# Supplementary material for: Spatiotemporal transformation of dissolved organic matter along an alpine stream flowpath on the Qinghai-Tibetan Plateau: importance of source and permafrost degradation
Source: Copernicus journal article supplement (doi:10.5194/bg-2018-182), 2018-05-28
Supplement: Supplementary file 1 [file DATA.xlsx]

## Sheet: suppl. mateiral 
Bulk characteristics
Sample	Discharge	pH	Conductivity	DOC
	m3/min		μS/cm	μg/ml
	2015	2015	2015	2015	2016	Avg	SD
AL	--	--	--	10.8044	12.34	11.5722	1.08583
PL	--	--	--	141.203	111.6	126.401	20.9323
Q-1	0.15	7.42	38	12.2929	11.0856	11.6892	0.853669
Q-2	--	7.6	36	9.13068	11.3093	10.22	1.54051
Q-3	--	7.95	38	5.84255	4.52064	5.18159	0.934732
Q-4	--	8.19	35	4.79735	3.99957	4.39846	0.564116
Q-5	1.49	8.14	36	4.0478	2.54084	3.29432	1.06558
Q-6	--	8.08	37	3.61127	2.52075	3.06601	0.771114
Q-7	--	7.94	46	3.37947	2.92394	3.1517	0.322108
Q-8	--	7.88	48	3.52833	3.22265	3.37549	0.216148
Q-9	10.07	8.12	53	3.73932	3.82008	3.7797	0.0571059
Q-10	--	8.23	55	4.02991	3.87768	3.95379	0.107643
Q-11	--	8.3	56	3.9302	4.91982	4.42501	0.699767
Q-12	--	8.25	58	4.01264	4.97072	4.49168	0.677465
Q-13	--	8.36	56	4.2602	3.88571	4.07296	0.264804
Q-14	--	8.29	58	4.12441	4.55547	4.33994	0.304805
Q-15	--	8.39	58	4.06129	4.39875	4.23002	0.23862
Q-16	28.28	8.38	60	4.065	3.7022	3.8836	0.256538
Q-17	--	8.35	60	3.96774	4.35052	4.15913	0.270666
Q-18	--	8.37	59	4.11439	3.96206	4.03823	0.107714
Q-19	24.14	8.42	59	3.89248	4.10003	3.99626	0.14676
Q-20		8.31	53	4.5159	4.93991	4.7279	0.29982
Optical properties
Sample	S(275-295)		SUVA254
	×10-3 nm-1		L mgC-1m-1
	2015	2016	2015	2016
AL	14.83	14.15	3.34727	3.6872
PL	17.1	18.99	1.04757	0.85305
Q-1	16.33	15.76	2.78879	3.05802
Q-2	16.6	16.29	2.60974	2.73227
Q-3	16.92	16.5	2.54738	2.72085
Q-4	16.95	17.42	2.54859	2.22524
Q-5	16.96	18.2	2.10713	2.24335
Q-6	17.04	17.48	2.13486	2.45959
Q-7	17.72	18.64	2.31382	2.35983
Q-8	17.81	18.16	1.9886	2.14109
Q-9	18.74	18.84	1.88132	1.64918
Q-10	18.4	18.19	2.30343	1.75363
Q-11	20.85	18.95	1.69134	1.62608
Q-12	20.43	18.11	1.77341	1.58931
Q-13	18.56	20.25	1.90596	1.69853
Q-14	20.51	21.21	1.72664	1.27319
Q-15	20.99	20.62	1.93043	1.5459
Q-16	19.45	19.04	1.67003	1.94479
Q-17	20.41	19.5	1.78941	1.4481
Q-18	21.75	22.37	1.68068	1.46388
Q-19	22.55	21.04	1.55116	1.51218
Q-20	18.37	17.71	1.90773	2.00409
Radiocarbon data
Spatial change at Aug.1/2015
Sample	fraction	±	D14C	±	14C age	±
	Modern		(‰)		(BP)
AL	0.935831	0.00152071	-64.169	1.52071	535	15
PL	0.597063	0.00100006	-402.937	1.00006	4145	15
Q-1	0.911565	0.00147518	-88.4351	1.47518	745	15
Q-5	0.930717	0.00150882	-69.2835	1.50882	575	15
Q-16	0.976424	0.00159192	-23.5761	1.59192	190	15
Q-19	0.980121	0.00158614	-19.8792	1.58614	160	15
Temporal change at Q-1
Time	fraction	±	D14C	±	14C age	±	DOC (μg/ml)	Relative abundance of AL leachate %	Relative abundance of PL leachate %
	Modern		(‰)		(BP)
Aug. 1	0.911565	0.00147518	-88.4351	1.47518	745	15	13.8734	94.1828	5.81717
Aug. 11	0.881557	0.0014273	-118.443	1.4273	1015	15	13.2356	86.7036	13.2964
Sep.5	0.82328	0.00143646	-176.72	1.43646	1560	15	13.0439	71.6066	28.3934
Sep. 20							12.208
Oct. 15							10.223
Relative abundance of AL leachate
1.0 = fAL + fPL
Δ14CDOM = fAL × Δ14CAL + fPL × Δ14CPL

## Sheet: Bulk character
Sample	Discharge	pH	Conductivity	DOC
	m3/min		μS/cm	μg/ml
	2015	2015	2015	2015	2016	Avg	SD
AL	--	--	--	10.8044	12.34	11.5722	1.08583
PL	--	--	--	141.203	111.6	126.401	20.9323
Q-1	0.15	7.42	38	12.2929	11.0856	11.6892	0.853669
Q-2	--	7.6	36	9.13068	11.3093	10.22	1.54051
Q-3	--	7.95	38	5.84255	4.52064	5.18159	0.934732
Q-4	--	8.19	35	4.79735	3.99957	4.39846	0.564116
Q-5	1.49	8.14	36	4.0478	2.54084	3.29432	1.06558
Q-6	--	8.08	37	3.61127	2.52075	3.06601	0.771114
Q-7	--	7.94	46	3.37947	2.92394	3.1517	0.322108
Q-8	--	7.88	48	3.52833	3.22265	3.37549	0.216148
Q-9	10.07	8.12	53	3.73932	3.82008	3.7797	0.0571059
Q-10	--	8.23	55	4.02991	3.87768	3.95379	0.107643
Q-11	--	8.3	56	3.9302	4.91982	4.42501	0.699767
Q-12	--	8.25	58	4.01264	4.97072	4.49168	0.677465
Q-13	--	8.36	56	4.2602	3.88571	4.07296	0.264804
Q-14	--	8.29	58	4.12441	4.55547	4.33994	0.304805
Q-15	--	8.39	58	4.06129	4.39875	4.23002	0.23862
Q-16	28.28	8.38	60	4.065	3.7022	3.8836	0.256538
Q-17	--	8.35	60	3.96774	4.35052	4.15913	0.270666
Q-18	--	8.37	59	4.11439	3.96206	4.03823	0.107714
Q-19	24.14	8.42	59	3.89248	4.10003	3.99626	0.14676
Q-20		8.31	53	4.5159	4.93991	4.7279	0.29982

## Sheet: Optical character
Sample	S(275-295)		SUVA254
	×10-3 nm-1		L mgC-1m-1
	2015	2016	2015	2016
AL	14.83	14.15	3.34727	3.6872
PL	17.1	18.99	1.04757	0.85305
Q-1	16.33	15.76	2.78879	3.05802
Q-2	16.6	16.29	2.60974	2.73227
Q-3	16.92	16.5	2.54738	2.72085
Q-4	16.95	17.42	2.54859	2.22524
Q-5	16.96	18.2	2.10713	2.24335
Q-6	17.04	17.48	2.13486	2.45959
Q-7	17.72	18.64	2.31382	2.35983
Q-8	17.81	18.16	1.9886	2.14109
Q-9	18.74	18.84	1.88132	1.64918
Q-10	18.4	18.19	2.30343	1.75363
Q-11	20.85	18.95	1.69134	1.62608
Q-12	20.43	18.11	1.77341	1.58931
Q-13	18.56	20.25	1.90596	1.69853
Q-14	20.51	21.21	1.72664	1.27319
Q-15	20.99	20.62	1.93043	1.5459
Q-16	19.45	19.04	1.67003	1.94479
Q-17	20.41	19.5	1.78941	1.4481
Q-18	21.75	22.37	1.68068	1.46388
Q-19	22.55	21.04	1.55116	1.51218
Q-20	18.37	17.71	1.90773	2.00409

## Sheet: Radio carbon related data
Spatial change at Aug.1/2015								Temporal change at Q-1
Sample	fraction	±	D14C	±	14C age	±		Time	fraction	±	D14C	±	14C age	±	DOC (μg/ml)	Relative abundance of AL leachate %	Relative abundance of PL leachate %
	Modern		(‰)		(BP)				Modern		(‰)		(BP)
AL	0.935831	0.00152071	-64.169	1.52071	535	15		Aug. 1	0.911565	0.00147518	-88.4351	1.47518	745	15	13.8734	94.1828	5.81717
PL	0.597063	0.00100006	-402.937	1.00006	4145	15		Aug. 11	0.881557	0.0014273	-118.443	1.4273	1015	15	13.2356	86.7036	13.2964
Q-1	0.911565	0.00147518	-88.4351	1.47518	745	15		Sep.5	0.82328	0.00143646	-176.72	1.43646	1560	15	13.0439	71.6066	28.3934
Q-5	0.930717	0.00150882	-69.2835	1.50882	575	15		Sep. 20							12.208
Q-16	0.976424	0.00159192	-23.5761	1.59192	190	15		Oct. 15							10.223
Q-19	0.980121	0.00158614	-19.8792	1.58614	160	15
															Relative abundance of AL leachate
															1.0 = fAL + fPL
															Δ14CDOM = fAL × Δ14CAL + fPL × Δ14CPL

## Sheet: FT-ICR MS data
Bulk characteristics
Sample	Discharge	pH	Conductivity	DOC
	m3/min		μS/cm	μg/ml
	2015	2015	2015	2015	2016	Avg	SD
AL	--	--	--	10.8044	12.34	11.5722	1.08583
PL	--	--	--	141.203	111.6	126.401	20.9323
Q-1	0.15	7.42	38	12.2929	11.0856	11.6892	0.853669
Q-2	--	7.6	36	9.13068	11.3093	10.22	1.54051
Q-3	--	7.95	38	5.84255	4.52064	5.18159	0.934732
Q-4	--	8.19	35	4.79735	3.99957	4.39846	0.564116
Q-5	1.49	8.14	36	4.0478	2.54084	3.29432	1.06558
Q-6	--	8.08	37	3.61127	2.52075	3.06601	0.771114
Q-7	--	7.94	46	3.37947	2.92394	3.1517	0.322108
Q-8	--	7.88	48	3.52833	3.22265	3.37549	0.216148
Q-9	10.07	8.12	53	3.73932	3.82008	3.7797	0.0571059
Q-10	--	8.23	55	4.02991	3.87768	3.95379	0.107643
Q-11	--	8.3	56	3.9302	4.91982	4.42501	0.699767
Q-12	--	8.25	58	4.01264	4.97072	4.49168	0.677465
Q-13	--	8.36	56	4.2602	3.88571	4.07296	0.264804
Q-14	--	8.29	58	4.12441	4.55547	4.33994	0.304805
Q-15	--	8.39	58	4.06129	4.39875	4.23002	0.23862
Q-16	28.28	8.38	60	4.065	3.7022	3.8836	0.256538
Q-17	--	8.35	60	3.96774	4.35052	4.15913	0.270666
Q-18	--	8.37	59	4.11439	3.96206	4.03823	0.107714
Q-19	24.14	8.42	59	3.89248	4.10003	3.99626	0.14676
Q-20		8.31	53	4.5159	4.93991	4.7279	0.29982
Optical properties
Sample	S(275-295)		SUVA254
	×10-3 nm-1		L mgC-1m-1
	2015	2016	2015	2016
AL	14.83	14.15	3.34727	3.6872
PL	17.1	18.99	1.04757	0.85305
Q-1	16.33	15.76	2.78879	3.05802
Q-2	16.6	16.29	2.60974	2.73227
Q-3	16.92	16.5	2.54738	2.72085
Q-4	16.95	17.42	2.54859	2.22524
Q-5	16.96	18.2	2.10713	2.24335
Q-6	17.04	17.48	2.13486	2.45959
Q-7	17.72	18.64	2.31382	2.35983
Q-8	17.81	18.16	1.9886	2.14109
Q-9	18.74	18.84	1.88132	1.64918
Q-10	18.4	18.19	2.30343	1.75363
Q-11	20.85	18.95	1.69134	1.62608
Q-12	20.43	18.11	1.77341	1.58931
Q-13	18.56	20.25	1.90596	1.69853
Q-14	20.51	21.21	1.72664	1.27319
Q-15	20.99	20.62	1.93043	1.5459
Q-16	19.45	19.04	1.67003	1.94479
Q-17	20.41	19.5	1.78941	1.4481
Q-18	21.75	22.37	1.68068	1.46388
Q-19	22.55	21.04	1.55116	1.51218
Q-20	18.37	17.71	1.90773	2.00409
Radiocarbon data
Spatial change at Aug.1/2015
Sample	fraction	±	D14C	±	14C age	±
	Modern		(‰)		(BP)
AL	0.935831	0.00152071	-64.169	1.52071	535	15
PL	0.597063	0.00100006	-402.937	1.00006	4145	15
Q-1	0.911565	0.00147518	-88.4351	1.47518	745	15
Q-5	0.930717	0.00150882	-69.2835	1.50882	575	15
Q-16	0.976424	0.00159192	-23.5761	1.59192	190	15
Q-19	0.980121	0.00158614	-19.8792	1.58614	160	15
Temporal change at Q-1
Time	fraction	±	D14C	±	14C age	±	DOC (μg/ml)	Relative abundance of AL leachate %	Relative abundance of PL leachate %
	Modern		(‰)		(BP)
Aug. 1	0.911565	0.00147518	-88.4351	1.47518	745	15	13.8734	94.1828	5.81717
Aug. 11	0.881557	0.0014273	-118.443	1.4273	1015	15	13.2356	86.7036	13.2964
Sep.5	0.82328	0.00143646	-176.72	1.43646	1560	15	13.0439	71.6066	28.3934
Sep. 20							12.208
Oct. 15							10.223
Relative abundance of AL leachate
1.0 = fAL + fPL
Δ14CDOM = fAL × Δ14CAL + fPL × Δ14CPL
FT-ICR MS data
	Molecular.Formula	DBE	OC	HC	Theor_mz	NC	C	H	N	O	S	AI	AImod	NOSC	Count	Compound.category	Class	AL	PL	Q-1	Q-5	Q-9	Q-17
1	C10H10O10N0S0	6	1	1	289.02	0	10	10	0	10	0	0	0.2	1	5	Sugars_wo_X	CHO	0	0	0.0862745	0	0	0
2	C10H10O2N2S0	7	0.2	1	189.067	0.2	10	10	2	2	0	0.5	0.571429	0	8	Polyphenolic_LowOC	CHON	0.151529	0	0	0	0	0
3	C10H10O3N0S0	6	0.3	1	177.056	0	10	10	0	3	0	0.428571	0.529412	-0.4	64	Polyphenolic_LowOC	CHO	0.103697	0.783454	0	0.743514	0.478313	0.677277
4	C10H10O3N2S0	7	0.3	1	205.062	0.2	10	10	2	3	0	0.4	0.538462	0.2	52	Polyphenolic_LowOC	CHON	0.342873	0	0.301769	0	0.171912	0.228652
5	C10H10O4N0S0	6	0.4	1	193.051	0	10	10	0	4	0	0.333333	0.5	-0.2	71	Highly_Unsaturated_and_Phenolic_LowOC	CHO	0.943197	1.0656	1.12312	1.09223	0.572141	0.692687
6	C10H10O4N2S0	7	0.4	1	221.057	0.2	10	10	2	4	0	0.25	0.5	0.4	74	Highly_Unsaturated_and_Phenolic_LowOC	CHON	0.418479	0.29948	0.372258	0.338872	0.201894	0.31908
7	C10H10O5N0S0	6	0.5	1	209.046	0	10	10	0	5	0	0.2	0.466667	0	75	Highly_Unsaturated_and_Phenolic_HighOC	CHO	1.12425	0.948807	1.21892	1.02521	0.568068	0.781675
8	C10H10O5N0S1	6	0.5	1	241.018	0	10	10	0	5	1	0	0.384615	0.2	51	Highly_Unsaturated_and_Phenolic_HighOC	CHOS	0.213415	0.453689	0.176256	0	0	0
9	C10H10O5N2S0	7	0.5	1	237.052	0.2	10	10	2	5	0	0	0.454545	0.6	78	Highly_Unsaturated_and_Phenolic_HighOC	CHON	0.49165	0.345613	0.423661	0.294969	0.184738	0.302527
10	C10H10O6N0S0	6	0.6	1	225.04	0	10	10	0	6	0	0	0.428571	0.2	77	Highly_Unsaturated_and_Phenolic_HighOC	CHO	1.06102	0.986039	1.18571	0.840251	0.553478	0.71123
11	C10H10O6N0S1	6	0.6	1	257.013	0	10	10	0	6	1	0	0.333333	0.4	66	Highly_Unsaturated_and_Phenolic_HighOC	CHOS	0.280882	0.809976	0.24487	0	0	0
12	C10H10O6N2S0	7	0.6	1	253.047	0.2	10	10	2	6	0	0	0.4	0.8	78	Highly_Unsaturated_and_Phenolic_HighOC	CHON	0.362554	0.3518	0.327715	0.241467	0.140871	0.216925
13	C10H10O7N0S0	6	0.7	1	241.035	0	10	10	0	7	0	0	0.384615	0.4	78	Highly_Unsaturated_and_Phenolic_HighOC	CHO	0.876077	0.891711	1.0681	0.518323	0.43794	0.5526
14	C10H10O7N0S1	6	0.7	1	273.007	0	10	10	0	7	1	0	0.272727	0.6	73	Highly_Unsaturated_and_Phenolic_HighOC	CHOS	0.249145	0.480066	0.182881	0	0	0.0844585
15	C10H10O7N2S0	7	0.7	1	269.042	0.2	10	10	2	7	0	0	0.333333	1	78	Highly_Unsaturated_and_Phenolic_HighOC	CHON	0.214322	0.312687	0.230939	0.129289	0.0972595	0.134795
16	C10H10O8N0S0	6	0.8	1	257.03	0	10	10	0	8	0	0	0.333333	0.6	78	Highly_Unsaturated_and_Phenolic_HighOC	CHO	0.595256	0.56343	0.784587	0.384611	0.268049	0.359171
17	C10H10O8N0S1	6	0.8	1	289.002	0	10	10	0	8	1	0	0.2	0.8	71	Highly_Unsaturated_and_Phenolic_HighOC	CHOS	0.199513	0.389574	0.173571	0	0	0.0782776
18	C10H10O8N2S0	7	0.8	1	285.036	0.2	10	10	2	8	0	0	0.25	1.2	59	Highly_Unsaturated_and_Phenolic_HighOC	CHON	0.101927	0	0.0893207	0	0	0
19	C10H10O9N0S0	6	0.9	1	273.025	0	10	10	0	9	0	0	0.272727	0.8	76	Highly_Unsaturated_and_Phenolic_HighOC	CHO	0.221311	0.17382	0.327545	0.160672	0.131924	0.180983
20	C10H10O9N0S1	6	0.9	1	304.997	0	10	10	0	9	1	0	0.111111	1	53	Highly_Unsaturated_and_Phenolic_HighOC	CHOS	0.08621	0	0.111411	0	0	0
21	C10H11O2N1S0	6	0.2	1.1	176.072	0.1	10	11	1	2	0	0.428571	0.5	-0.4	7	Highly_Unsaturated_and_Phenolic_LowOC	CHON	0	0	0	0	0.141672	0.143601
22	C10H11O3N1S0	6	0.3	1.1	192.067	0.1	10	11	1	3	0	0.333333	0.466667	-0.2	61	Highly_Unsaturated_and_Phenolic_LowOC	CHON	0.342752	0.368263	0.326118	3.20392	0.182879	0.260954
23	C10H11O4N1S0	6	0.4	1.1	208.062	0.1	10	11	1	4	0	0.2	0.428571	0	76	Highly_Unsaturated_and_Phenolic_LowOC	CHON	0.476901	0.585972	0.471655	0.80169	0.243582	0.346851
24	C10H11O5N1S0	6	0.5	1.1	224.056	0.1	10	11	1	5	0	0	0.384615	0.2	77	Highly_Unsaturated_and_Phenolic_HighOC	CHON	0.613545	0.864828	0.57887	0.470581	0.277605	0.382455
25	C10H11O6N1S0	6	0.6	1.1	240.051	0.1	10	11	1	6	0	0	0.333333	0.4	78	Highly_Unsaturated_and_Phenolic_HighOC	CHON	0.653541	1.09118	0.650531	0.354897	0.272217	0.355953
26	C10H11O6N1S1	6	0.6	1.1	272.023	0.1	10	11	1	6	1	0	0.2	0.6	37	Highly_Unsaturated_and_Phenolic_HighOC	CHONS	0.171467	0	0.106512	0	0	0
27	C10H11O7N1S0	6	0.7	1.1	256.046	0.1	10	11	1	7	0	0	0.272727	0.6	78	Highly_Unsaturated_and_Phenolic_HighOC	CHON	0.485659	0.890119	0.485544	0.24973	0.176241	0.277422
28	C10H11O7N1S1	6	0.7	1.1	288.018	0.1	10	11	1	7	1	0	0.111111	0.8	47	Highly_Unsaturated_and_Phenolic_HighOC	CHONS	0.163298	0	0.125471	0	0	0
29	C10H11O8N1S0	6	0.8	1.1	272.041	0.1	10	11	1	8	0	0	0.2	0.8	73	Highly_Unsaturated_and_Phenolic_HighOC	CHON	0.192554	0.33114	0.208273	0	0	0.105668
30	C10H11O8N1S1	6	0.8	1.1	304.013	0.1	10	11	1	8	1	0	0	1	45	Highly_Unsaturated_and_Phenolic_HighOC	CHONS	0.134163	0	0.125897	0	0	0
31	C10H11O9N1S0	6	0.9	1.1	288.036	0.1	10	11	1	9	0	0	0.111111	1	8	Highly_Unsaturated_and_Phenolic_HighOC	CHON	0	0	0.0656325	0	0	0
32	C10H11O9N1S1	6	0.9	1.1	320.008	0.1	10	11	1	9	1	0	0	1.2	6	Highly_Unsaturated_and_Phenolic_HighOC	CHONS	0.0638822	0	0	0	0	0
33	C10H12O10N0S0	5	1	1.2	291.036	0	10	12	0	10	0	0	0	0.8	10	Sugars_wo_X	CHO	0	0	0.0935386	0	0	0
34	C10H12O10N0S1	5	1	1.2	323.008	0	10	12	0	10	1	0	0	1	3	Sugars_w_X	CHOS	0	0	0.0672302	0	0	0
35	C10H12O3N0S0	5	0.3	1.2	179.071	0	10	12	0	3	0	0.285714	0.411765	-0.6	56	Highly_Unsaturated_and_Phenolic_LowOC	CHO	0.0787371	0.751759	0	0.83324	0.396766	0.526352
36	C10H12O3N2S0	6	0.3	1.2	207.078	0.2	10	12	2	3	0	0.2	0.384615	0	53	Highly_Unsaturated_and_Phenolic_LowOC	CHON	0.224034	0	0.186033	0	0.124741	0.190466
37	C10H12O4N0S0	5	0.4	1.2	195.066	0	10	12	0	4	0	0.166667	0.375	-0.4	71	Highly_Unsaturated_and_Phenolic_LowOC	CHO	0.761519	1.16322	0.904966	0.98014	0.456443	0.664068
38	C10H12O4N2S0	6	0.4	1.2	223.072	0.2	10	12	2	4	0	0	0.333333	0.2	75	Highly_Unsaturated_and_Phenolic_LowOC	CHON	0.342117	0.366526	0.264809	0.254654	0.152287	0.217983
39	C10H12O5N0S0	5	0.5	1.2	211.061	0	10	12	0	5	0	0	0.333333	-0.2	75	Highly_Unsaturated_and_Phenolic_HighOC	CHO	0.917012	1.29543	1.11017	1.05868	0.521731	0.72791
40	C10H12O5N0S1	5	0.5	1.2	243.033	0	10	12	0	5	1	0	0.230769	0	51	Highly_Unsaturated_and_Phenolic_HighOC	CHOS	0.135298	0.397896	0.0980334	0	0	0
41	C10H12O5N2S0	6	0.5	1.2	239.067	0.2	10	12	2	5	0	0	0.272727	0.4	78	Highly_Unsaturated_and_Phenolic_HighOC	CHON	0.397104	0.844204	0.375773	0.249897	0.150876	0.215486
42	C10H12O6N0S0	5	0.6	1.2	227.056	0	10	12	0	6	0	0	0.285714	0	77	Highly_Unsaturated_and_Phenolic_HighOC	CHO	0.879723	1.97067	1.04117	0.815295	0.504415	0.670419
43	C10H12O6N0S1	5	0.6	1.2	259.028	0	10	12	0	6	1	0	0.166667	0.2	67	Highly_Unsaturated_and_Phenolic_HighOC	CHOS	0.183659	1.10443	0.174083	0	0	0.105076
44	C10H12O6N2S0	6	0.6	1.2	255.062	0.2	10	12	2	6	0	0	0.2	0.6	78	Highly_Unsaturated_and_Phenolic_HighOC	CHON	0.392415	0.982312	0.352213	0.161757	0.109156	0.147326
45	C10H12O7N0S0	5	0.7	1.2	243.051	0	10	12	0	7	0	0	0.230769	0.2	78	Highly_Unsaturated_and_Phenolic_HighOC	CHO	0.991014	2.75416	1.31482	0.588685	0.463979	0.717241
46	C10H12O7N0S1	5	0.7	1.2	275.023	0	10	12	0	7	1	0	0.0909091	0.4	72	Highly_Unsaturated_and_Phenolic_HighOC	CHOS	0.228905	0.954886	0.215154	0	0	0.0905124
47	C10H12O7N2S0	6	0.7	1.2	271.057	0.2	10	12	2	7	0	0	0.111111	0.8	76	Highly_Unsaturated_and_Phenolic_HighOC	CHON	0.201071	0.428796	0.17894	0.13872	0	0.128318
48	C10H12O8N0S0	5	0.8	1.2	259.046	0	10	12	0	8	0	0	0.166667	0.4	78	Highly_Unsaturated_and_Phenolic_HighOC	CHO	0.634405	1.94888	0.896573	0.375096	0.353123	0.490579
49	C10H12O8N0S1	5	0.8	1.2	291.018	0	10	12	0	8	1	0	0	0.6	72	Highly_Unsaturated_and_Phenolic_HighOC	CHOS	0.215487	0.557134	0.214174	0	0	0.102874
50	C10H12O8N2S0	6	0.8	1.2	287.052	0.2	10	12	2	8	0	0	0	1	62	Highly_Unsaturated_and_Phenolic_HighOC	CHON	0.0837896	0.308381	0.08293	0	0	0
51	C10H12O9N0S0	5	0.9	1.2	275.041	0	10	12	0	9	0	0	0.0909091	0.6	78	Highly_Unsaturated_and_Phenolic_HighOC	CHO	0.210026	0.246401	0.299234	0.173359	0.145328	0.160281
52	C10H12O9N0S1	5	0.9	1.2	307.013	0	10	12	0	9	1	0	0	0.8	60	Highly_Unsaturated_and_Phenolic_HighOC	CHOS	0.130593	0.244158	0.139679	0	0	0
53	C10H13O2N1S0	5	0.2	1.3	178.087	0.1	10	13	1	2	0	0.285714	0.375	-0.6	2	Highly_Unsaturated_and_Phenolic_LowOC	CHON	0	0	0	0	0	0.0982174
54	C10H13O3N1S0	5	0.3	1.3	194.082	0.1	10	13	1	3	0	0.166667	0.333333	-0.4	46	Highly_Unsaturated_and_Phenolic_LowOC	CHON	0.196775	0.370687	0.178727	0.215592	0.117109	0.15846
55	C10H13O4N1S0	5	0.4	1.3	210.077	0.1	10	13	1	4	0	0	0.285714	-0.2	75	Highly_Unsaturated_and_Phenolic_LowOC	CHON	0.297719	0.579712	0.29851	0.251065	0.143308	0.2143
56	C10H13O5N1S0	5	0.5	1.3	226.072	0.1	10	13	1	5	0	0	0.230769	0	77	Highly_Unsaturated_and_Phenolic_HighOC	CHON	0.369497	1.14043	0.342925	0.271515	0.136253	0.215105
57	C10H13O6N1S0	5	0.6	1.3	242.067	0.1	10	13	1	6	0	0	0.166667	0.2	78	Highly_Unsaturated_and_Phenolic_HighOC	CHON	0.527335	2.02834	0.555033	0.218013	0.163029	0.244909
58	C10H13O6N1S1	5	0.6	1.3	274.039	0.1	10	13	1	6	1	0	0	0.4	23	Highly_Unsaturated_and_Phenolic_HighOC	CHONS	0.134859	0	0.132117	0	0	0
59	C10H13O7N1S0	5	0.7	1.3	258.062	0.1	10	13	1	7	0	0	0.0909091	0.4	78	Highly_Unsaturated_and_Phenolic_HighOC	CHON	0.387075	1.50073	0.408238	0.164511	0.111048	0.185893
60	C10H13O7N1S1	5	0.7	1.3	290.034	0.1	10	13	1	7	1	0	0	0.6	31	Highly_Unsaturated_and_Phenolic_HighOC	CHONS	0.173539	0	0.11663	0	0	0
61	C10H13O8N1S0	5	0.8	1.3	274.057	0.1	10	13	1	8	0	0	0	0.6	72	Highly_Unsaturated_and_Phenolic_HighOC	CHON	0.158866	0.496493	0.181304	0	0	0
62	C10H13O8N1S1	5	0.8	1.3	306.029	0.1	10	13	1	8	1	0	0	0.8	32	Highly_Unsaturated_and_Phenolic_HighOC	CHONS	0.103727	0	0.100888	0	0	0
63	C10H14O10N0S0	4	1	1.4	293.051	0	10	14	0	10	0	0	0	0.6	17	Sugars_wo_X	CHO	0	0	0.0626715	0	0	0
64	C10H14O3N0S0	4	0.3	1.4	181.087	0	10	14	0	3	0	0.142857	0.294118	-0.8	48	Highly_Unsaturated_and_Phenolic_LowOC	CHO	0	0.634202	0.0616703	0.546034	0.223379	0.310401
65	C10H14O3N2S0	5	0.3	1.4	209.093	0.2	10	14	2	3	0	0	0.230769	-0.2	40	Highly_Unsaturated_and_Phenolic_LowOC	CHON	0.118098	0	0.119187	0	0	0
66	C10H14O4N0S0	4	0.4	1.4	197.082	0	10	14	0	4	0	0	0.25	-0.6	71	Highly_Unsaturated_and_Phenolic_LowOC	CHO	0.37998	0.829189	0.432928	0.583927	0.225977	0.342322
67	C10H14O4N2S0	5	0.4	1.4	225.088	0.2	10	14	2	4	0	0	0.166667	0	71	Highly_Unsaturated_and_Phenolic_LowOC	CHON	0.182177	0.56115	0.141661	0	0	0.0977094
68	C10H14O5N0S0	4	0.5	1.4	213.077	0	10	14	0	5	0	0	0.2	-0.4	76	Highly_Unsaturated_and_Phenolic_HighOC	CHO	0.496233	1.55385	0.587263	0.717556	0.28498	0.385207
69	C10H14O5N0S1	4	0.5	1.4	245.049	0	10	14	0	5	1	0	0.0769231	-0.2	49	Highly_Unsaturated_and_Phenolic_HighOC	CHOS	0.139549	0.410632	0.0738339	0	0	0
70	C10H14O5N2S0	5	0.5	1.4	241.083	0.2	10	14	2	5	0	0	0.0909091	0.2	75	Highly_Unsaturated_and_Phenolic_HighOC	CHON	0.255574	0.901589	0.183605	0	0	0.112781
71	C10H14O6N0S0	4	0.6	1.4	229.072	0	10	14	0	6	0	0	0.142857	-0.2	77	Highly_Unsaturated_and_Phenolic_HighOC	CHO	0.540919	2.86534	0.666316	0.514317	0.312814	0.429617
72	C10H14O6N0S1	4	0.6	1.4	261.044	0	10	14	0	6	1	0	0	0	58	Highly_Unsaturated_and_Phenolic_HighOC	CHOS	0.188288	1.08626	0.127686	0	0	0
73	C10H14O6N2S0	5	0.6	1.4	257.078	0.2	10	14	2	6	0	0	0	0.4	74	Highly_Unsaturated_and_Phenolic_HighOC	CHON	0.272275	1.65483	0.211937	0.146817	0	0.0767535
74	C10H14O7N0S0	4	0.7	1.4	245.067	0	10	14	0	7	0	0	0.0769231	0	78	Highly_Unsaturated_and_Phenolic_HighOC	CHO	0.507851	2.51329	0.614487	0.309575	0.226426	0.393251
75	C10H14O7N0S1	4	0.7	1.4	277.039	0	10	14	0	7	1	0	0	0.2	70	Highly_Unsaturated_and_Phenolic_HighOC	CHOS	0.241914	1.1536	0.212832	0.119022	0.0879921	0.0987678
76	C10H14O7N2S0	5	0.7	1.4	273.073	0.2	10	14	2	7	0	0	0	0.6	72	Highly_Unsaturated_and_Phenolic_HighOC	CHON	0.14631	0.49396	0.11974	0	0	0.080225
77	C10H14O8N0S0	4	0.8	1.4	261.062	0	10	14	0	8	0	0	0	0.2	78	Highly_Unsaturated_and_Phenolic_HighOC	CHO	0.251974	1.02899	0.341604	0.242719	0.149208	0.228991
78	C10H14O8N0S1	4	0.8	1.4	293.034	0	10	14	0	8	1	0	0	0.4	64	Highly_Unsaturated_and_Phenolic_HighOC	CHOS	0.189453	0.794526	0.179728	0	0	0.0823418
79	C10H14O8N2S0	5	0.8	1.4	289.068	0.2	10	14	2	8	0	0	0	0.8	32	Highly_Unsaturated_and_Phenolic_HighOC	CHON	0	0.130473	0	0	0	0
80	C10H14O9N0S0	4	0.9	1.4	277.057	0	10	14	0	9	0	0	0	0.4	75	Highly_Unsaturated_and_Phenolic_HighOC	CHO	0.119021	0.346662	0.151438	0.118772	0	0
81	C10H14O9N0S1	4	0.9	1.4	309.029	0	10	14	0	9	1	0	0	0.6	50	Highly_Unsaturated_and_Phenolic_HighOC	CHOS	0.103954	0.1867	0.100568	0	0	0
82	C10H15O4N1S0	4	0.4	1.5	212.093	0.1	10	15	1	4	0	0	0.142857	-0.4	40	Peptide_like	CHON	0	0.289603	0	0	0	0
83	C10H15O5N1S0	4	0.5	1.5	228.088	0.1	10	15	1	5	0	0	0.0769231	-0.2	62	Peptide_like	CHON	0.149109	0.918703	0.146667	0	0	0
84	C10H15O6N1S0	4	0.6	1.5	244.083	0.1	10	15	1	6	0	0	0	0	70	Peptide_like	CHON	0.227831	1.84605	0.196237	0	0	0
85	C10H15O6N1S1	4	0.6	1.5	276.055	0.1	10	15	1	6	1	0	0	0.2	16	Peptide_like	CHONS	0.0784043	0	0	0	0	0
86	C10H15O7N1S0	4	0.7	1.5	260.078	0.1	10	15	1	7	0	0	0	0.2	68	Peptide_like	CHON	0.151212	0.828175	0.128453	0	0	0
87	C10H15O7N1S1	4	0.7	1.5	292.05	0.1	10	15	1	7	1	0	0	0.4	28	Peptide_like	CHONS	0.10462	0	0.0804803	0	0	0
88	C10H15O8N1S0	4	0.8	1.5	276.072	0.1	10	15	1	8	0	0	0	0.4	62	Peptide_like	CHON	0.0706895	0.374884	0.0798838	0	0	0
89	C10H15O8N1S1	4	0.8	1.5	308.045	0.1	10	15	1	8	1	0	0	0.6	22	Peptide_like	CHONS	0.0676338	0	0.0631614	0	0	0
90	C10H15O9N1S0	4	0.9	1.5	292.067	0.1	10	15	1	9	0	0	0	0.6	31	Peptide_like	CHON	0	0.156018	0	0	0	0
91	C10H16O10N0S0	3	1	1.6	295.067	0	10	16	0	10	0	0	0	0.4	40	Sugars_wo_X	CHO	0	0.192092	0	0	0	0
92	C10H16O3N0S0	3	0.3	1.6	183.103	0	10	16	0	3	0	0	0.176471	-1	32	Aliphatic_LowOC	CHO	0	0.272669	0	0	0	0
93	C10H16O4N0S0	3	0.4	1.6	199.098	0	10	16	0	4	0	0	0.125	-0.8	48	Aliphatic_LowOC	CHO	0.120155	0.438493	0.0952002	0.218263	0	0
94	C10H16O4N2S0	4	0.4	1.6	227.104	0.2	10	16	2	4	0	0	0	-0.2	53	Peptide_like	CHON	0	0.563213	0.0596892	0	0	0
95	C10H16O5N0S0	3	0.5	1.6	215.092	0	10	16	0	5	0	0	0.0666667	-0.6	65	Aliphatic_HighOC	CHO	0.135071	0.776073	0.149223	0.338454	0	0.0880993
96	C10H16O5N0S1	3	0.5	1.6	247.065	0	10	16	0	5	1	0	0	-0.4	40	Aliphatic_HighOC	CHOS	0	0.448732	0	0	0	0
97	C10H16O5N2S0	4	0.5	1.6	243.099	0.2	10	16	2	5	0	0	0	0	62	Peptide_like	CHON	0.108765	0.739746	0	0	0	0
98	C10H16O6N0S0	3	0.6	1.6	231.087	0	10	16	0	6	0	0	0	-0.4	71	Aliphatic_HighOC	CHO	0.15516	1.78317	0.164198	0	0	0.118284
99	C10H16O6N0S1	3	0.6	1.6	263.059	0	10	16	0	6	1	0	0	-0.2	54	Aliphatic_HighOC	CHOS	0.176277	1.20588	0.149628	0	0	0
100	C10H16O6N2S0	4	0.6	1.6	259.094	0.2	10	16	2	6	0	0	0	0.2	58	Peptide_like	CHON	0.0780413	0.467836	0	0	0	0
101	C10H16O7N0S0	3	0.7	1.6	247.082	0	10	16	0	7	0	0	0	-0.2	70	Aliphatic_HighOC	CHO	0.115436	0.657866	0.154591	0	0	0
102	C10H16O7N0S1	3	0.7	1.6	279.054	0	10	16	0	7	1	0	0	0	65	Aliphatic_HighOC	CHOS	0.207167	1.08731	0.187162	0	0	0
103	C10H16O7N2S0	4	0.7	1.6	275.088	0.2	10	16	2	7	0	0	0	0.4	70	Peptide_like	CHON	0.121593	0.935528	0.0834626	0	0	0
104	C10H16O8N0S0	3	0.8	1.6	263.077	0	10	16	0	8	0	0	0	0	68	Aliphatic_HighOC	CHO	0.0972226	0.484914	0.0867644	0	0	0
105	C10H16O8N0S1	3	0.8	1.6	295.049	0	10	16	0	8	1	0	0	0.2	51	Aliphatic_HighOC	CHOS	0.0916255	0.524172	0.119485	0	0	0.0827228
106	C10H16O8N2S0	4	0.8	1.6	291.083	0.2	10	16	2	8	0	0	0	0.6	25	Peptide_like	CHON	0	0.130075	0	0	0	0
107	C10H16O9N0S0	3	0.9	1.6	279.072	0	10	16	0	9	0	0	0	0.2	48	Aliphatic_HighOC	CHO	0.0704777	0.28034	0	0	0	0
108	C10H16O9N0S1	3	0.9	1.6	311.044	0	10	16	0	9	1	0	0	0.4	26	Aliphatic_HighOC	CHOS	0	0.162314	0	0	0	0
109	C10H17O4N1S0	3	0.4	1.7	214.108	0.1	10	17	1	4	0	0	0	-0.6	26	Peptide_like	CHON	0	0.154715	0	0	0	0
110	C10H17O5N1S0	3	0.5	1.7	230.103	0.1	10	17	1	5	0	0	0	-0.4	32	Peptide_like	CHON	0	0.324772	0	0	0	0
111	C10H17O6N1S0	3	0.6	1.7	246.098	0.1	10	17	1	6	0	0	0	-0.2	31	Peptide_like	CHON	0	0.445874	0	0	0	0
112	C10H17O7N1S0	3	0.7	1.7	262.093	0.1	10	17	1	7	0	0	0	0	49	Peptide_like	CHON	0	0.583801	0	0	0	0
113	C10H17O8N1S0	3	0.8	1.7	278.088	0.1	10	17	1	8	0	0	0	0.2	26	Peptide_like	CHON	0	0.200377	0	0	0	0
114	C10H18O5N0S0	2	0.5	1.8	217.108	0	10	18	0	5	0	0	0	-0.8	24	Aliphatic_HighOC	CHO	0	0.226573	0	0	0	0
115	C10H18O5N0S1	2	0.5	1.8	249.08	0	10	18	0	5	1	0	0	-0.6	28	Aliphatic_HighOC	CHOS	0	0.39341	0	0	0	0
116	C10H18O6N0S0	2	0.6	1.8	233.103	0	10	18	0	6	0	0	0	-0.6	28	Aliphatic_HighOC	CHO	0	0.214054	0	0	0	0
117	C10H18O6N0S1	2	0.6	1.8	265.075	0	10	18	0	6	1	0	0	-0.4	54	Aliphatic_HighOC	CHOS	0.0775421	0.839971	0	0	0	0
118	C10H18O7N0S0	2	0.7	1.8	249.098	0	10	18	0	7	0	0	0	-0.4	24	Aliphatic_HighOC	CHO	0	0.181454	0	0	0	0
119	C10H18O7N0S1	2	0.7	1.8	281.07	0	10	18	0	7	1	0	0	-0.2	52	Aliphatic_HighOC	CHOS	0.0959217	0.550621	0.0633106	0	0	0
120	C10H18O8N0S0	2	0.8	1.8	265.093	0	10	18	0	8	0	0	0	-0.2	29	Aliphatic_HighOC	CHO	0	0.256749	0	0	0	0
121	C10H18O8N0S1	2	0.8	1.8	297.065	0	10	18	0	8	1	0	0	0	24	Aliphatic_HighOC	CHOS	0	0.192345	0	0	0	0
122	C10H18O9N0S0	2	0.9	1.8	281.088	0	10	18	0	9	0	0	0	0	36	Aliphatic_HighOC	CHO	0	0.216334	0	0	0	0
123	C10H20O6N0S1	1	0.6	2	267.091	0	10	20	0	6	1	0	0	-0.6	31	Aliphatic_HighOC	CHOS	0	0.296767	0	0	0	0
124	C10H5O3N1S0	9	0.3	0.5	186.02	0.1	10	5	1	3	0	0.833333	0.866667	0.4	44	Condensed_aromatics.X	CHON	0.146386	0	0	0	0	0.09627
125	C10H5O4N1S0	9	0.4	0.5	202.015	0.1	10	5	1	4	0	0.8	0.857143	0.6	68	Condensed_aromatics.X	CHON	0.264469	0.136479	0.246404	0	0.104058	0.146903
126	C10H5O5N1S0	9	0.5	0.5	218.009	0.1	10	5	1	5	0	0.75	0.846154	0.8	66	Condensed_aromatics.X	CHON	0.264318	0	0.238373	0.120692	0.124773	0.144236
127	C10H5O6N1S0	9	0.6	0.5	234.004	0.1	10	5	1	6	0	0.666667	0.833333	1	78	Condensed_aromatics.X	CHON	0.389405	0.174905	0.326565	0.136634	0.130256	0.19254
128	C10H5O6N1S1	9	0.6	0.5	265.976	0.1	10	5	1	6	1	0.5	0.8	1.2	39	Condensed_aromatics.X	CHONS	0.118522	0	0.0832922	0	0	0
129	C10H5O7N1S0	9	0.7	0.5	249.999	0.1	10	5	1	7	0	0.5	0.818182	1.2	65	Condensed_aromatics.X	CHON	0.2301	0	0.161195	0	0	0.109225
130	C10H5O7N1S1	9	0.7	0.5	281.971	0.1	10	5	1	7	1	0	0.777778	1.4	43	Condensed_aromatics.X	CHONS	0.0906423	0	0.0787335	0	0	0
131	C10H5O8N1S0	9	0.8	0.5	265.994	0.1	10	5	1	8	0	0	0.8	1.4	40	Condensed_aromatics.X	CHON	0	0	0.068977	0	0	0
132	C10H6O3N0S0	8	0.3	0.6	173.024	0	10	6	0	3	0	0.714286	0.764706	0	62	Condensed_aromatics	CHO	0	0.181743	0	0.164595	0.202568	0.182041
133	C10H6O3N2S0	9	0.3	0.6	201.031	0.2	10	6	2	3	0	0.8	0.846154	0.6	51	Condensed_aromatics.X	CHON	0.219814	0	0.130498	0	0	0.15393
134	C10H6O4N0S0	8	0.4	0.6	189.019	0	10	6	0	4	0	0.666667	0.75	0.2	64	Condensed_aromatics	CHO	0.931579	0.56144	0	0.487858	0.334941	0.402141
135	C10H6O4N2S0	9	0.4	0.6	217.025	0.2	10	6	2	4	0	0.75	0.833333	0.8	66	Condensed_aromatics.X	CHON	0.316809	0	0.174892	0.136884	0.105533	0.161
136	C10H6O5N0S0	8	0.5	0.6	205.014	0	10	6	0	5	0	0.6	0.733333	0.4	73	Condensed_aromatics	CHO	1.31109	0.571426	1.21549	0.670482	0.491941	0.553531
137	C10H6O5N0S1	8	0.5	0.6	236.986	0	10	6	0	5	1	0.5	0.692308	0.6	51	Condensed_aromatics.X	CHOS	0.235667	0.182974	0.154762	0	0	0
138	C10H6O5N2S0	9	0.5	0.6	233.02	0.2	10	6	2	5	0	0.666667	0.818182	1	77	Condensed_aromatics.X	CHON	0.375488	0.140242	0.235178	0	0.128236	0.181914
139	C10H6O6N0S0	8	0.6	0.6	221.009	0	10	6	0	6	0	0.5	0.714286	0.6	76	Condensed_aromatics	CHO	1.38948	0.995699	1.29382	0.578502	0.533115	0.577959
140	C10H6O6N0S1	8	0.6	0.6	252.981	0	10	6	0	6	1	0.333333	0.666667	0.8	53	Condensed_aromatics.X	CHOS	0.164947	0	0.114543	0	0	0
141	C10H6O6N2S0	9	0.6	0.6	249.015	0.2	10	6	2	6	0	0.5	0.8	1.2	78	Condensed_aromatics.X	CHON	0.348803	0.209568	0.255096	0.12787	0.139812	0.21701
142	C10H6O7N0S0	8	0.7	0.6	237.004	0	10	6	0	7	0	0.333333	0.692308	0.8	78	Condensed_aromatics	CHO	0.702629	0.338413	0.633106	0.291296	0.267888	0.375809
143	C10H6O7N0S1	8	0.7	0.6	268.976	0	10	6	0	7	1	0	0.636364	1	55	Polyphenolic_HighOC	CHOS	0.113787	0	0.0758363	0	0	0
144	C10H6O7N2S0	9	0.7	0.6	265.01	0.2	10	6	2	7	0	0	0.777778	1.4	59	Condensed_aromatics.X	CHON	0.197108	0	0.100313	0	0	0.0955926
145	C10H6O8N0S1	8	0.8	0.6	284.971	0	10	6	0	8	1	0	0.6	1.2	50	Polyphenolic_HighOC	CHOS	0.0984782	0	0	0	0	0
146	C10H6O9N0S0	8	0.9	0.6	268.994	0	10	6	0	9	0	0	0.636364	1.2	62	Polyphenolic_HighOC	CHO	0.0896439	0	0.103018	0	0	0.113035
147	C10H7O2N1S0	8	0.2	0.7	172.04	0.1	10	7	1	2	0	0.714286	0.75	0	8	Condensed_aromatics.X	CHON	0	0	0	0	0	0.0764995
148	C10H7O3N1S0	8	0.3	0.7	188.035	0.1	10	7	1	3	0	0.666667	0.733333	0.2	58	Condensed_aromatics.X	CHON	0.396666	0.398113	0.331102	0.27043	0.172585	0.225815
149	C10H7O4N1S0	8	0.4	0.7	204.03	0.1	10	7	1	4	0	0.6	0.714286	0.4	75	Condensed_aromatics.X	CHON	0.713732	0.319489	0.609737	0.57917	0.27815	0.36188
150	C10H7O5N1S0	8	0.5	0.7	220.025	0.1	10	7	1	5	0	0.5	0.692308	0.6	77	Condensed_aromatics.X	CHON	0.641091	0.377381	0.56055	0.371841	0.301912	0.360695
151	C10H7O6N1S0	8	0.6	0.7	236.02	0.1	10	7	1	6	0	0.333333	0.666667	0.8	78	Condensed_aromatics.X	CHON	0.540783	0.260946	0.477428	0.230533	0.244351	0.280258
152	C10H7O6N1S1	8	0.6	0.7	267.992	0.1	10	7	1	6	1	0	0.6	1	39	Polyphenolic_HighOC	CHONS	0.148307	0	0.121019	0	0	0
153	C10H7O7N1S0	8	0.7	0.7	252.015	0.1	10	7	1	7	0	0	0.636364	1	77	Polyphenolic_HighOC	CHON	0.273349	0.145814	0.256033	0	0.0983497	0.180178
154	C10H7O7N1S1	8	0.7	0.7	283.987	0.1	10	7	1	7	1	0	0.555556	1.2	47	Polyphenolic_HighOC	CHONS	0.123816	0	0.0984381	0	0	0
155	C10H7O8N1S0	8	0.8	0.7	268.01	0.1	10	7	1	8	0	0	0.6	1.2	68	Polyphenolic_HighOC	CHON	0.139337	0	0.125982	0	0	0.102959
156	C10H8O2N2S0	8	0.2	0.8	187.051	0.2	10	8	2	2	0	0.666667	0.714286	0.2	7	Condensed_aromatics.X	CHON	0.14808	0	0	0	0	0
157	C10H8O3N0S0	7	0.3	0.8	175.04	0	10	8	0	3	0	0.571429	0.647059	-0.2	68	Polyphenolic_LowOC	CHO	0.131334	0.690647	0	0.739007	0.577239	0.636339
158	C10H8O3N2S0	8	0.3	0.8	203.046	0.2	10	8	2	3	0	0.6	0.692308	0.4	52	Condensed_aromatics.X	CHON	0.451184	0	0.311185	0	0.137504	0.252825
159	C10H8O4N0S0	7	0.4	0.8	191.035	0	10	8	0	4	0	0.5	0.625	0	72	Polyphenolic_LowOC	CHO	1.1548	1.0347	1.09185	0.82456	0.538342	0.700519
160	C10H8O4N2S0	8	0.4	0.8	219.041	0.2	10	8	2	4	0	0.5	0.666667	0.6	74	Condensed_aromatics.X	CHON	0.556303	0.24177	0.4122	0.290795	0.24464	0.332246
161	C10H8O5N0S0	7	0.5	0.8	207.03	0	10	8	0	5	0	0.4	0.6	0.2	73	Polyphenolic_HighOC	CHO	1.24505	0.785734	1.23475	0.857195	0.59074	0.678378
162	C10H8O5N0S1	7	0.5	0.8	239.002	0	10	8	0	5	1	0.25	0.538462	0.4	51	Polyphenolic_HighOC	CHOS	0.228602	0.213946	0.179877	0	0	0
163	C10H8O5N2S0	8	0.5	0.8	235.036	0.2	10	8	2	5	0	0.333333	0.636364	0.8	78	Polyphenolic_HighOC	CHON	0.496778	0.245352	0.382931	0.259412	0.214272	0.27268
164	C10H8O6N0S0	7	0.6	0.8	223.025	0	10	8	0	6	0	0.25	0.571429	0.4	77	Polyphenolic_HighOC	CHO	1.20086	0.904701	1.19726	0.695021	0.524938	0.673594
165	C10H8O6N0S1	7	0.6	0.8	254.997	0	10	8	0	6	1	0	0.5	0.6	67	Highly_Unsaturated_and_Phenolic_HighOC	CHOS	0.260506	0.294451	0.215601	0	0	0.122645
166	C10H8O6N2S0	8	0.6	0.8	251.031	0.2	10	8	2	6	0	0	0.6	1	78	Polyphenolic_HighOC	CHON	0.310289	0.187786	0.254733	0.177532	0.172072	0.183692
167	C10H8O7N0S0	7	0.7	0.8	239.02	0	10	8	0	7	0	0	0.538462	0.6	78	Polyphenolic_HighOC	CHO	0.87399	0.527175	0.889714	0.463236	0.414178	0.491976
168	C10H8O7N0S1	7	0.7	0.8	270.992	0	10	8	0	7	1	0	0.454545	0.8	72	Highly_Unsaturated_and_Phenolic_HighOC	CHOS	0.253925	0.40032	0.158681	0	0	0.0896234
169	C10H8O7N2S0	8	0.7	0.8	267.026	0.2	10	8	2	7	0	0	0.555556	1.2	62	Polyphenolic_HighOC	CHON	0.155447	0	0.134013	0	0	0.0952116
170	C10H8O8N0S0	7	0.8	0.8	255.015	0	10	8	0	8	0	0	0.5	0.8	76	Highly_Unsaturated_and_Phenolic_HighOC	CHO	0.33655	0	0.393476	0.142977	0.177652	0.215782
171	C10H8O8N0S1	7	0.8	0.8	286.987	0	10	8	0	8	1	0	0.4	1	71	Highly_Unsaturated_and_Phenolic_HighOC	CHOS	0.16115	0.191476	0.148009	0	0	0.0862366
172	C10H8O8N2S0	8	0.8	0.8	283.021	0.2	10	8	2	8	0	0	0.5	1.4	35	Highly_Unsaturated_and_Phenolic_HighOC	CHON	0.0709164	0	0	0	0	0
173	C10H8O9N0S0	7	0.9	0.8	271.01	0	10	8	0	9	0	0	0.454545	1	42	Highly_Unsaturated_and_Phenolic_HighOC	CHO	0.0772093	0	0.119804	0	0	0.1066
174	C10H8O9N0S1	7	0.9	0.8	302.982	0	10	8	0	9	1	0	0.333333	1.2	42	Highly_Unsaturated_and_Phenolic_HighOC	CHOS	0.0925785	0	0.0650148	0	0	0
175	C10H9O2N1S0	7	0.2	0.9	174.056	0.1	10	9	1	2	0	0.571429	0.625	-0.2	9	Polyphenolic_LowOC	CHON	0	0	0	0	0.14924	0.239701
176	C10H9O3N1S0	7	0.3	0.9	190.051	0.1	10	9	1	3	0	0.5	0.6	0	59	Polyphenolic_LowOC	CHON	0.402112	0.458646	0.390855	0.328271	0.261571	0.30621
177	C10H9O4N1S0	7	0.4	0.9	206.046	0.1	10	9	1	4	0	0.4	0.571429	0.2	75	Polyphenolic_LowOC	CHON	0.657323	0.471129	0.615041	0.46407	0.343438	0.417212
178	C10H9O5N1S0	7	0.5	0.9	222.041	0.1	10	9	1	5	0	0.25	0.538462	0.4	77	Polyphenolic_HighOC	CHON	0.689846	0.594511	0.618748	0.445958	0.325192	0.428389
179	C10H9O6N1S0	7	0.6	0.9	238.036	0.1	10	9	1	6	0	0	0.5	0.6	78	Highly_Unsaturated_and_Phenolic_HighOC	CHON	0.615708	0.5258	0.584025	0.32752	0.271255	0.404385
180	C10H9O6N1S1	7	0.6	0.9	270.008	0.1	10	9	1	6	1	0	0.4	0.8	39	Highly_Unsaturated_and_Phenolic_HighOC	CHONS	0.139654	0	0.0952002	0	0	0
181	C10H9O7N1S0	7	0.7	0.9	254.031	0.1	10	9	1	7	0	0	0.454545	0.8	78	Highly_Unsaturated_and_Phenolic_HighOC	CHON	0.366411	0.363125	0.403019	0.193891	0.158508	0.23695
182	C10H9O7N1S1	7	0.7	0.9	286.003	0.1	10	9	1	7	1	0	0.333333	1	48	Highly_Unsaturated_and_Phenolic_HighOC	CHONS	0.147021	0	0.126131	0	0	0
183	C10H9O8N1S0	7	0.8	0.9	270.026	0.1	10	9	1	8	0	0	0.4	1	67	Highly_Unsaturated_and_Phenolic_HighOC	CHON	0.140698	0	0.176085	0	0	0.112611
184	C10H9O8N1S1	7	0.8	0.9	301.998	0.1	10	9	1	8	1	0	0.25	1.2	46	Highly_Unsaturated_and_Phenolic_HighOC	CHONS	0.0949384	0	0.0745795	0	0	0
185	C11H10O10N0S0	7	0.909091	0.909091	301.02	0	11	10	0	10	0	0	0.333333	0.909091	74	Sugars_wo_X	CHO	0.255241	0	0.377797	0.119774	0.14924	0.172007
186	C11H10O10N0S1	7	0.909091	0.909091	332.992	0	11	10	0	10	1	0	0.2	1.09091	35	Sugars_w_X	CHOS	0.116827	0	0.118441	0	0	0
187	C11H10O11N0S0	7	1	0.909091	317.015	0	11	10	0	11	0	0	0.272727	1.09091	3	Sugars_wo_X	CHO	0	0	0.082717	0	0	0
188	C11H10O2N0S0	7	0.181818	0.909091	173.061	0	11	10	0	2	0	0.555556	0.6	-0.545455	55	Polyphenolic_LowOC	CHO	0.106889	0.615351	0	0.539691	0.513683	0.63871
189	C11H10O2N2S0	8	0.181818	0.909091	201.067	0.181818	11	10	2	2	0	0.571429	0.625	0	12	Polyphenolic_LowOC	CHON	0.291577	0	0	0	0	0
190	C11H10O3N0S0	7	0.272727	0.909091	189.056	0	11	10	0	3	0	0.5	0.578947	-0.363636	67	Polyphenolic_LowOC	CHO	1.26353	1.32054	1.30121	1.25441	0.869371	1.09593
191	C11H10O3N2S0	8	0.272727	0.909091	217.062	0.181818	11	10	2	3	0	0.5	0.6	0.181818	55	Polyphenolic_LowOC	CHON	0.599098	0	0.462218	0	0.286583	0.46141
192	C11H10O4N0S0	7	0.363636	0.909091	205.051	0	11	10	0	4	0	0.428571	0.555556	-0.181818	76	Polyphenolic_LowOC	CHO	2.07651	2.32305	2.2419	1.74569	1.12418	1.41014
193	C11H10O4N2S0	8	0.363636	0.909091	233.057	0.181818	11	10	2	4	0	0.4	0.571429	0.363636	76	Polyphenolic_LowOC	CHON	0.751051	0.311023	0.592205	0.503633	0.34206	0.525802
194	C11H10O5N0S0	7	0.454545	0.909091	221.046	0	11	10	0	5	0	0.333333	0.529412	0	77	Polyphenolic_LowOC	CHO	2.12999	1.79363	2.33808	1.54512	1.09714	1.37276
195	C11H10O5N0S1	7	0.454545	0.909091	253.018	0	11	10	0	5	1	0.2	0.466667	0.181818	51	Highly_Unsaturated_and_Phenolic_LowOC	CHOS	0.299791	0.401008	0.242016	0	0	0
196	C11H10O5N2S0	8	0.454545	0.909091	249.052	0.181818	11	10	2	5	0	0.25	0.538462	0.545455	78	Polyphenolic_LowOC	CHON	0.697712	0.52978	0.588648	0.385446	0.322242	0.442783
197	C11H10O6N0S0	7	0.545455	0.909091	237.04	0	11	10	0	6	0	0.2	0.5	0.181818	78	Highly_Unsaturated_and_Phenolic_HighOC	CHO	2.23084	2.06716	2.41741	1.35098	1.04991	1.2938
198	C11H10O6N0S1	7	0.545455	0.909091	269.013	0	11	10	0	6	1	0	0.428571	0.363636	67	Highly_Unsaturated_and_Phenolic_HighOC	CHOS	0.338411	0.589698	0.250792	0	0	0.129122
199	C11H10O6N2S0	8	0.545455	0.909091	265.047	0.181818	11	10	2	6	0	0	0.5	0.727273	78	Highly_Unsaturated_and_Phenolic_HighOC	CHON	0.662209	0.44269	0.569731	0.376431	0.286551	0.331018
200	C11H10O7N0S0	7	0.636364	0.909091	253.035	0	11	10	0	7	0	0	0.466667	0.363636	78	Highly_Unsaturated_and_Phenolic_HighOC	CHO	1.709	1.80893	1.87194	0.926388	0.735042	0.938908
201	C11H10O7N0S1	7	0.636364	0.909091	285.007	0	11	10	0	7	1	0	0.384615	0.545455	75	Highly_Unsaturated_and_Phenolic_HighOC	CHOS	0.403125	0.812943	0.343372	0.135966	0.0981573	0.134287
202	C11H10O7N2S0	8	0.636364	0.909091	281.042	0.181818	11	10	2	7	0	0	0.454545	0.909091	78	Highly_Unsaturated_and_Phenolic_HighOC	CHON	0.489411	0.250236	0.425323	0.238128	0.21129	0.260403
203	C11H10O8N0S0	7	0.727273	0.909091	269.03	0	11	10	0	8	0	0	0.428571	0.545455	78	Highly_Unsaturated_and_Phenolic_HighOC	CHO	1.15325	1.01802	1.45425	0.630501	0.516985	0.676642
204	C11H10O8N0S1	7	0.727273	0.909091	301.002	0	11	10	0	8	1	0	0.333333	0.727273	74	Highly_Unsaturated_and_Phenolic_HighOC	CHOS	0.375231	0.570124	0.320962	0	0.0875431	0.142796
205	C11H10O8N2S0	8	0.727273	0.909091	297.036	0.181818	11	10	2	8	0	0	0.4	1.09091	74	Highly_Unsaturated_and_Phenolic_HighOC	CHON	0.21762	0.124648	0.184137	0	0.0876073	0.102578
206	C11H10O9N0S0	7	0.818182	0.909091	285.025	0	11	10	0	9	0	0	0.384615	0.727273	78	Highly_Unsaturated_and_Phenolic_HighOC	CHO	0.68021	0.478221	0.96572	0.350891	0.350397	0.370051
207	C11H10O9N0S1	7	0.818182	0.909091	316.997	0	11	10	0	9	1	0	0.272727	0.909091	69	Highly_Unsaturated_and_Phenolic_HighOC	CHOS	0.232853	0.218794	0.199006	0	0.105693	0.0932642
208	C11H10O9N2S0	8	0.818182	0.909091	313.031	0.181818	11	10	2	9	0	0	0.333333	1.27273	37	Highly_Unsaturated_and_Phenolic_HighOC	CHON	0	0	0.0779879	0	0	0
209	C11H11O10N1S0	7	0.909091	1	316.031	0.0909091	11	11	1	10	0	0	0.2	1.09091	8	Sugars_w_X	CHON	0	0	0.0736422	0	0	0
210	C11H11O2N1S0	7	0.181818	1	188.072	0.0909091	11	11	1	2	0	0.5	0.555556	-0.363636	14	Polyphenolic_LowOC	CHON	0	0	0	0	0.216036	0.253841
211	C11H11O3N1S0	7	0.272727	1	204.067	0.0909091	11	11	1	3	0	0.428571	0.529412	-0.181818	65	Polyphenolic_LowOC	CHON	0.655099	0.643827	0.632126	0.657211	0.358253	0.526522
212	C11H11O4N1S0	7	0.363636	1	220.062	0.0909091	11	11	1	4	0	0.333333	0.5	0	76	Highly_Unsaturated_and_Phenolic_LowOC	CHON	0.871781	0.871015	0.88556	0.710629	0.512592	0.650775
213	C11H11O5N1S0	7	0.454545	1	236.056	0.0909091	11	11	1	5	0	0.2	0.466667	0.181818	78	Highly_Unsaturated_and_Phenolic_LowOC	CHON	1.06155	1.03438	1.07973	0.759456	0.532153	0.695693
214	C11H11O6N1S0	7	0.545455	1	252.051	0.0909091	11	11	1	6	0	0	0.428571	0.363636	78	Highly_Unsaturated_and_Phenolic_HighOC	CHON	1.00198	1.259	0.947997	0.557886	0.425947	0.569322
215	C11H11O6N1S1	7	0.545455	1	284.023	0.0909091	11	11	1	6	1	0	0.333333	0.545455	39	Highly_Unsaturated_and_Phenolic_HighOC	CHONS	0.228481	0	0.161898	0	0	0
216	C11H11O7N1S0	7	0.636364	1	268.046	0.0909091	11	11	1	7	0	0	0.384615	0.545455	78	Highly_Unsaturated_and_Phenolic_HighOC	CHON	0.946858	1.40449	0.999123	0.512898	0.38551	0.489394
217	C11H11O7N1S1	7	0.636364	1	300.018	0.0909091	11	11	1	7	1	0	0.272727	0.727273	48	Highly_Unsaturated_and_Phenolic_HighOC	CHONS	0.223036	0	0.189761	0	0	0
218	C11H11O8N1S0	7	0.727273	1	284.041	0.0909091	11	11	1	8	0	0	0.333333	0.727273	78	Highly_Unsaturated_and_Phenolic_HighOC	CHON	0.680346	0.668648	0.728476	0.324682	0.281068	0.351593
219	C11H11O8N1S1	7	0.727273	1	316.013	0.0909091	11	11	1	8	1	0	0.2	0.909091	48	Highly_Unsaturated_and_Phenolic_HighOC	CHONS	0.235243	0	0.18484	0	0	0
220	C11H11O9N1S0	7	0.818182	1	300.036	0.0909091	11	11	1	9	0	0	0.272727	0.909091	74	Highly_Unsaturated_and_Phenolic_HighOC	CHON	0.249675	0.23352	0.278954	0	0	0.0926292
221	C11H11O9N1S1	7	0.818182	1	332.008	0.0909091	11	11	1	9	1	0	0.111111	1.09091	37	Highly_Unsaturated_and_Phenolic_HighOC	CHONS	0.135056	0	0.10076	0	0	0
222	C11H12O10N0S0	6	0.909091	1.09091	303.036	0	11	12	0	10	0	0	0.166667	0.727273	78	Sugars_wo_X	CHO	0.327065	0.390479	0.544104	0.128371	0.140165	0.220905
223	C11H12O10N0S1	6	0.909091	1.09091	335.008	0	11	12	0	10	1	0	0	0.909091	46	Sugars_w_X	CHOS	0.12669	0.156343	0.132266	0	0	0
224	C11H12O11N0S0	6	1	1.09091	319.031	0	11	12	0	11	0	0	0.0909091	0.909091	8	Sugars_wo_X	CHO	0.0643209	0	0.103977	0	0	0
225	C11H12O2N0S0	6	0.181818	1.09091	175.076	0	11	12	0	2	0	0.444444	0.5	-0.727273	49	Highly_Unsaturated_and_Phenolic_LowOC	CHO	0.0954376	0.793223	0	0.95702	0.619857	0.778077
226	C11H12O2N2S0	7	0.181818	1.09091	203.083	0.181818	11	12	2	2	0	0.428571	0.5	-0.181818	13	Highly_Unsaturated_and_Phenolic_LowOC	CHON	0.200345	0	0	0	0	0
227	C11H12O3N0S0	6	0.272727	1.09091	191.071	0	11	12	0	3	0	0.375	0.473684	-0.545455	67	Highly_Unsaturated_and_Phenolic_LowOC	CHO	1.03726	1.28284	1.14117	1.44096	0.776633	1.17565
228	C11H12O3N2S0	7	0.272727	1.09091	219.078	0.181818	11	12	2	3	0	0.333333	0.466667	0	55	Highly_Unsaturated_and_Phenolic_LowOC	CHON	0.417163	0	0.335959	0	0.274719	0.369077
229	C11H12O4N0S0	6	0.363636	1.09091	207.066	0	11	12	0	4	0	0.285714	0.444444	-0.363636	75	Highly_Unsaturated_and_Phenolic_LowOC	CHO	1.50849	1.77242	1.80205	1.73726	1.01354	1.41056
230	C11H12O4N2S0	7	0.363636	1.09091	235.072	0.181818	11	12	2	4	0	0.2	0.428571	0.181818	76	Highly_Unsaturated_and_Phenolic_LowOC	CHON	0.635721	0.529998	0.568197	0.602791	0.332151	0.443672
231	C11H12O5N0S0	6	0.454545	1.09091	223.061	0	11	12	0	5	0	0.166667	0.411765	-0.181818	77	Highly_Unsaturated_and_Phenolic_LowOC	CHO	1.75131	1.95865	2.06656	1.59462	1.05462	1.42627
232	C11H12O5N0S1	6	0.454545	1.09091	255.033	0	11	12	0	5	1	0	0.333333	0	51	Highly_Unsaturated_and_Phenolic_LowOC	CHOS	0.189015	0.520482	0.187397	0	0	0
233	C11H12O5N2S0	7	0.454545	1.09091	251.067	0.181818	11	12	2	5	0	0	0.384615	0.363636	78	Highly_Unsaturated_and_Phenolic_LowOC	CHON	0.636523	0.687571	0.531195	0.441869	0.303964	0.405147
234	C11H12O6N0S0	6	0.545455	1.09091	239.056	0	11	12	0	6	0	0	0.375	0	78	Highly_Unsaturated_and_Phenolic_HighOC	CHO	1.98294	2.80101	2.34816	1.55322	1.04083	1.31061
235	C11H12O6N0S1	6	0.545455	1.09091	271.028	0	11	12	0	6	1	0	0.285714	0.181818	67	Highly_Unsaturated_and_Phenolic_HighOC	CHOS	0.262563	0.959589	0.240461	0	0	0.126624
236	C11H12O6N2S0	7	0.545455	1.09091	267.062	0.181818	11	12	2	6	0	0	0.333333	0.545455	78	Highly_Unsaturated_and_Phenolic_HighOC	CHON	0.704202	0.859726	0.628866	0.482099	0.328752	0.422039
237	C11H12O7N0S0	6	0.636364	1.09091	255.051	0	11	12	0	7	0	0	0.333333	0.181818	78	Highly_Unsaturated_and_Phenolic_HighOC	CHO	2.11758	3.18161	2.50552	1.11919	0.883288	1.14216
238	C11H12O7N0S1	6	0.636364	1.09091	287.023	0	11	12	0	7	1	0	0.230769	0.363636	74	Highly_Unsaturated_and_Phenolic_HighOC	CHOS	0.35797	0.981624	0.322177	0	0.137504	0.13217
239	C11H12O7N2S0	7	0.636364	1.09091	283.057	0.181818	11	12	2	7	0	0	0.272727	0.727273	78	Highly_Unsaturated_and_Phenolic_HighOC	CHON	0.569706	0.793043	0.570285	0.354814	0.249097	0.346047
240	C11H12O8N0S0	6	0.727273	1.09091	271.046	0	11	12	0	8	0	0	0.285714	0.363636	78	Highly_Unsaturated_and_Phenolic_HighOC	CHO	1.80679	3.34346	2.29584	0.812374	0.697876	0.885735
241	C11H12O8N0S1	6	0.727273	1.09091	303.018	0	11	12	0	8	1	0	0.166667	0.545455	73	Highly_Unsaturated_and_Phenolic_HighOC	CHOS	0.436299	0.950291	0.336705	0	0	0.139155
242	C11H12O8N2S0	7	0.727273	1.09091	299.052	0.181818	11	12	2	8	0	0	0.2	0.909091	77	Highly_Unsaturated_and_Phenolic_HighOC	CHON	0.304949	0.353537	0.303005	0.157917	0.0978046	0.148173
243	C11H12O9N0S0	6	0.818182	1.09091	287.041	0	11	12	0	9	0	0	0.230769	0.545455	78	Highly_Unsaturated_and_Phenolic_HighOC	CHO	1.10858	1.42815	1.6236	0.473669	0.458206	0.655051
244	C11H12O9N0S1	6	0.818182	1.09091	319.013	0	11	12	0	9	1	0	0.0909091	0.727273	68	Highly_Unsaturated_and_Phenolic_HighOC	CHOS	0.290821	0.388416	0.286282	0	0	0.0852629
245	C11H12O9N2S0	7	0.818182	1.09091	315.047	0.181818	11	12	2	9	0	0	0.111111	1.09091	55	Highly_Unsaturated_and_Phenolic_HighOC	CHON	0.0916407	0.12595	0.113563	0	0	0.0814951
246	C11H13O10N1S0	6	0.909091	1.18182	318.047	0.0909091	11	13	1	10	0	0	0	0.909091	26	Sugars_w_X	CHON	0	0	0.0675497	0	0	0
247	C11H13O2N1S0	6	0.181818	1.18182	190.087	0.0909091	11	13	1	2	0	0.375	0.444444	-0.545455	15	Highly_Unsaturated_and_Phenolic_LowOC	CHON	0.1849	0	0.160726	0	0.16553	0.243257
248	C11H13O3N1S0	6	0.272727	1.18182	206.082	0.0909091	11	13	1	3	0	0.285714	0.411765	-0.363636	64	Highly_Unsaturated_and_Phenolic_LowOC	CHON	0.420552	0.530034	0.414437	0.496121	0.280619	0.422843
249	C11H13O4N1S0	6	0.363636	1.18182	222.077	0.0909091	11	13	1	4	0	0.166667	0.375	-0.181818	77	Highly_Unsaturated_and_Phenolic_LowOC	CHON	0.605315	0.859075	0.620985	0.666559	0.378584	0.550229
250	C11H13O5N1S0	6	0.454545	1.18182	238.072	0.0909091	11	13	1	5	0	0	0.333333	0	78	Highly_Unsaturated_and_Phenolic_LowOC	CHON	0.822451	1.46086	0.802481	0.659381	0.458431	0.588797
251	C11H13O6N1S0	6	0.545455	1.18182	254.067	0.0909091	11	13	1	6	0	0	0.285714	0.181818	78	Highly_Unsaturated_and_Phenolic_HighOC	CHON	1.01774	2.06879	0.990048	0.538939	0.372844	0.550653
252	C11H13O6N1S1	6	0.545455	1.18182	286.039	0.0909091	11	13	1	6	1	0	0.166667	0.363636	37	Highly_Unsaturated_and_Phenolic_HighOC	CHONS	0.198363	0	0.157531	0	0	0
253	C11H13O7N1S0	6	0.636364	1.18182	270.062	0.0909091	11	13	1	7	0	0	0.230769	0.363636	78	Highly_Unsaturated_and_Phenolic_HighOC	CHON	0.921338	2.61598	0.894869	0.476173	0.304156	0.461241
254	C11H13O7N1S1	6	0.636364	1.18182	302.034	0.0909091	11	13	1	7	1	0	0.0909091	0.545455	47	Highly_Unsaturated_and_Phenolic_HighOC	CHONS	0.236544	0	0.209956	0	0	0
255	C11H13O8N1S0	6	0.727273	1.18182	286.057	0.0909091	11	13	1	8	0	0	0.166667	0.545455	78	Highly_Unsaturated_and_Phenolic_HighOC	CHON	0.601776	1.79558	0.646824	0.305903	0.236559	0.3024
256	C11H13O8N1S1	6	0.727273	1.18182	318.029	0.0909091	11	13	1	8	1	0	0	0.727273	46	Highly_Unsaturated_and_Phenolic_HighOC	CHONS	0.253305	0	0.189378	0	0	0
257	C11H13O9N1S0	6	0.818182	1.18182	302.052	0.0909091	11	13	1	9	0	0	0.0909091	0.727273	74	Highly_Unsaturated_and_Phenolic_HighOC	CHON	0.208256	0.28385	0.252965	0	0	0.146606
258	C11H13O9N1S1	6	0.818182	1.18182	334.024	0.0909091	11	13	1	9	1	0	0	0.909091	33	Highly_Unsaturated_and_Phenolic_HighOC	CHONS	0.13678	0	0.135291	0	0	0
259	C11H14O10N0S0	5	0.909091	1.27273	305.051	0	11	14	0	10	0	0	0	0.545455	76	Sugars_wo_X	CHO	0.215154	0.231675	0.279231	0	0.140358	0.133144
260	C11H14O10N0S1	5	0.909091	1.27273	337.023	0	11	14	0	10	1	0	0	0.727273	50	Sugars_w_X	CHOS	0.105679	0.18102	0.142619	0	0	0.0776002
261	C11H14O11N0S0	5	1	1.27273	321.046	0	11	14	0	11	0	0	0	0.727273	15	Sugars_wo_X	CHO	0	0	0.0685722	0	0	0
262	C11H14O11N2S0	6	1	1.27273	349.052	0.181818	11	14	2	11	0	0	0	1.27273	10	Sugars_w_X	CHON	0	0	0.0710433	0	0	0
263	C11H14O2N0S0	5	0.181818	1.27273	177.092	0	11	14	0	2	0	0.333333	0.4	-0.909091	45	Highly_Unsaturated_and_Phenolic_LowOC	CHO	0	0.700524	0	0.813626	0.493384	0.642181
264	C11H14O3N0S0	5	0.272727	1.27273	193.087	0	11	14	0	3	0	0.25	0.368421	-0.727273	70	Highly_Unsaturated_and_Phenolic_LowOC	CHO	0.708271	1.3124	0.897851	1.35999	0.587597	0.827016
265	C11H14O3N2S0	6	0.272727	1.27273	221.093	0.181818	11	14	2	3	0	0.166667	0.333333	-0.181818	54	Highly_Unsaturated_and_Phenolic_LowOC	CHON	0.226122	0	0.205525	0	0.163382	0.21447
266	C11H14O4N0S0	5	0.363636	1.27273	209.082	0	11	14	0	4	0	0.142857	0.333333	-0.545455	75	Highly_Unsaturated_and_Phenolic_LowOC	CHO	0.972392	1.61774	1.10657	1.35332	0.644997	0.931541
267	C11H14O4N2S0	6	0.363636	1.27273	237.088	0.181818	11	14	2	4	0	0	0.285714	0	76	Highly_Unsaturated_and_Phenolic_LowOC	CHON	0.385033	0.64039	0.360585	0.34196	0.229376	0.306591
268	C11H14O5N0S0	5	0.454545	1.27273	225.077	0	11	14	0	5	0	0	0.294118	-0.363636	77	Highly_Unsaturated_and_Phenolic_LowOC	CHO	1.19107	2.41958	1.43831	1.3559	0.752101	1.08975
269	C11H14O5N0S1	5	0.454545	1.27273	257.049	0	11	14	0	5	1	0	0.2	-0.181818	50	Highly_Unsaturated_and_Phenolic_LowOC	CHOS	0.131728	0.470659	0.111198	0	0	0
270	C11H14O5N2S0	6	0.454545	1.27273	253.083	0.181818	11	14	2	5	0	0	0.230769	0.181818	78	Highly_Unsaturated_and_Phenolic_LowOC	CHON	0.458037	1.10179	0.385636	0.370338	0.227356	0.287921
271	C11H14O6N0S0	5	0.545455	1.27273	241.072	0	11	14	0	6	0	0	0.25	-0.181818	78	Highly_Unsaturated_and_Phenolic_HighOC	CHO	1.6246	5.02264	1.91154	1.25015	0.773458	1.04987
272	C11H14O6N0S1	5	0.545455	1.27273	273.044	0	11	14	0	6	1	0	0.142857	0	67	Highly_Unsaturated_and_Phenolic_HighOC	CHOS	0.224866	0.816272	0.191465	0	0	0.111849
273	C11H14O6N2S0	6	0.545455	1.27273	269.078	0.181818	11	14	2	6	0	0	0.166667	0.363636	78	Highly_Unsaturated_and_Phenolic_HighOC	CHON	0.558376	2.05229	0.478472	0.436694	0.204941	0.286397
274	C11H14O7N0S0	5	0.636364	1.27273	257.067	0	11	14	0	7	0	0	0.2	0	78	Highly_Unsaturated_and_Phenolic_HighOC	CHO	2.02228	8.25777	2.43959	1.05634	0.724235	1.04894
275	C11H14O7N0S1	5	0.636364	1.27273	289.039	0	11	14	0	7	1	0	0.0769231	0.181818	75	Highly_Unsaturated_and_Phenolic_HighOC	CHOS	0.416588	1.48915	0.327502	0.174444	0.120252	0.166673
276	C11H14O7N2S0	6	0.636364	1.27273	285.073	0.181818	11	14	2	7	0	0	0.0909091	0.545455	78	Highly_Unsaturated_and_Phenolic_HighOC	CHON	0.437993	1.39504	0.388683	0.324933	0.194583	0.258117
277	C11H14O8N0S0	5	0.727273	1.27273	273.062	0	11	14	0	8	0	0	0.142857	0.181818	78	Highly_Unsaturated_and_Phenolic_HighOC	CHO	1.44893	5.66317	1.89455	0.696356	0.537701	0.808558
278	C11H14O8N0S1	5	0.727273	1.27273	305.034	0	11	14	0	8	1	0	0	0.363636	75	Highly_Unsaturated_and_Phenolic_HighOC	CHOS	0.444029	1.08319	0.373345	0.15316	0.10983	0.147241
279	C11H14O8N2S0	6	0.727273	1.27273	301.068	0.181818	11	14	2	8	0	0	0	0.727273	75	Highly_Unsaturated_and_Phenolic_HighOC	CHON	0.224548	0.71232	0.212214	0.122027	0	0.115829
280	C11H14O9N0S0	5	0.818182	1.27273	289.057	0	11	14	0	9	0	0	0.0769231	0.363636	78	Highly_Unsaturated_and_Phenolic_HighOC	CHO	0.614346	1.19752	0.904093	0.32944	0.315027	0.415138
281	C11H14O9N0S1	5	0.818182	1.27273	321.029	0	11	14	0	9	1	0	0	0.545455	66	Highly_Unsaturated_and_Phenolic_HighOC	CHOS	0.291743	0.602941	0.319109	0	0	0.107404
282	C11H14O9N2S0	6	0.818182	1.27273	317.063	0.181818	11	14	2	9	0	0	0	0.909091	55	Highly_Unsaturated_and_Phenolic_HighOC	CHON	0	0	0.0826531	0	0	0
283	C11H15O10N1S0	5	0.909091	1.36364	320.062	0.0909091	11	15	1	10	0	0	0	0.727273	40	Sugars_w_X	CHON	0	0.155656	0.0608821	0.14089	0	0
284	C11H15O2N1S0	5	0.181818	1.36364	192.103	0.0909091	11	15	1	2	0	0.25	0.333333	-0.727273	2	Highly_Unsaturated_and_Phenolic_LowOC	CHON	0	0	0	0	0	0.097159
285	C11H15O3N1S0	5	0.272727	1.36364	208.098	0.0909091	11	15	1	3	0	0.142857	0.294118	-0.545455	46	Highly_Unsaturated_and_Phenolic_LowOC	CHON	0.187971	0.396702	0.160258	0.198899	0.135259	0.180983
286	C11H15O4N1S0	5	0.363636	1.36364	224.093	0.0909091	11	15	1	4	0	0	0.25	-0.363636	75	Highly_Unsaturated_and_Phenolic_LowOC	CHON	0.296024	0.675016	0.280786	0.262584	0.163895	0.215147
287	C11H15O5N1S0	5	0.454545	1.36364	240.088	0.0909091	11	15	1	5	0	0	0.2	-0.181818	77	Highly_Unsaturated_and_Phenolic_LowOC	CHON	0.397755	1.47884	0.380417	0.252067	0.217383	0.261504
288	C11H15O6N1S0	5	0.545455	1.36364	256.083	0.0909091	11	15	1	6	0	0	0.142857	0	78	Highly_Unsaturated_and_Phenolic_HighOC	CHON	0.550721	2.55899	0.527169	0.301145	0.160111	0.267812
289	C11H15O6N1S1	5	0.545455	1.36364	288.055	0.0909091	11	15	1	6	1	0	0	0.181818	23	Highly_Unsaturated_and_Phenolic_HighOC	CHONS	0.154358	0	0.0954771	0	0	0
290	C11H15O7N1S0	5	0.636364	1.36364	272.078	0.0909091	11	15	1	7	0	0	0.0769231	0.181818	78	Highly_Unsaturated_and_Phenolic_HighOC	CHON	0.518515	2.91604	0.497111	0.267926	0.193044	0.244739
291	C11H15O7N1S1	5	0.636364	1.36364	304.05	0.0909091	11	15	1	7	1	0	0	0.363636	31	Highly_Unsaturated_and_Phenolic_HighOC	CHONS	0.215865	0	0.156082	0	0	0
292	C11H15O8N1S0	5	0.727273	1.36364	288.072	0.0909091	11	15	1	8	0	0	0	0.363636	77	Highly_Unsaturated_and_Phenolic_HighOC	CHON	0.314419	1.15411	0.328141	0	0.143404	0.154565
293	C11H15O8N1S1	5	0.727273	1.36364	320.045	0.0909091	11	15	1	8	1	0	0	0.545455	33	Highly_Unsaturated_and_Phenolic_HighOC	CHONS	0.171391	0	0.149947	0	0	0
294	C11H15O9N1S0	5	0.818182	1.36364	304.067	0.0909091	11	15	1	9	0	0	0	0.545455	70	Highly_Unsaturated_and_Phenolic_HighOC	CHON	0.173418	0.746042	0.161237	0	0	0
295	C11H15O9N1S1	5	0.818182	1.36364	336.039	0.0909091	11	15	1	9	1	0	0	0.727273	27	Highly_Unsaturated_and_Phenolic_HighOC	CHONS	0.0986748	0	0.0974795	0	0	0
296	C11H16O10N0S0	4	0.909091	1.45455	307.067	0	11	16	0	10	0	0	0	0.363636	72	Sugars_wo_X	CHO	0.114331	0.248283	0.105404	0	0	0
297	C11H16O10N0S1	4	0.909091	1.45455	339.039	0	11	16	0	10	1	0	0	0.545455	37	Sugars_w_X	CHOS	0.0743805	0.213439	0.0871266	0	0	0
298	C11H16O2N0S0	4	0.181818	1.45455	179.108	0	11	16	0	2	0	0.222222	0.3	-1.09091	44	Highly_Unsaturated_and_Phenolic_LowOC	CHO	0	0.49548	0	0.418665	0.198014	0.265314
299	C11H16O3N0S0	4	0.272727	1.45455	195.103	0	11	16	0	3	0	0.125	0.263158	-0.909091	66	Highly_Unsaturated_and_Phenolic_LowOC	CHO	0.322331	0.775964	0.371662	0.613975	0.258621	0.333135
300	C11H16O3N2S0	5	0.272727	1.45455	223.109	0.181818	11	16	2	3	0	0	0.2	-0.363636	40	Highly_Unsaturated_and_Phenolic_LowOC	CHON	0.126342	0	0.0888947	0	0	0
301	C11H16O4N0S0	4	0.363636	1.45455	211.098	0	11	16	0	4	0	0	0.222222	-0.727273	76	Highly_Unsaturated_and_Phenolic_LowOC	CHO	0.451532	1.08822	0.520608	0.592608	0.306593	0.407264
302	C11H16O4N2S0	5	0.363636	1.45455	239.104	0.181818	11	16	2	4	0	0	0.142857	-0.181818	71	Highly_Unsaturated_and_Phenolic_LowOC	CHON	0.168668	0.668612	0.148456	0	0	0.0973284
303	C11H16O5N0S0	4	0.454545	1.45455	227.092	0	11	16	0	5	0	0	0.176471	-0.545455	77	Highly_Unsaturated_and_Phenolic_LowOC	CHO	0.542931	2.30333	0.618428	0.58134	0.27427	0.446847
304	C11H16O5N0S1	4	0.454545	1.45455	259.065	0	11	16	0	5	1	0	0.0666667	-0.363636	44	Highly_Unsaturated_and_Phenolic_LowOC	CHOS	0.0953166	0.431509	0.11614	0	0	0
305	C11H16O5N2S0	5	0.454545	1.45455	255.099	0.181818	11	16	2	5	0	0	0.0769231	0	75	Highly_Unsaturated_and_Phenolic_LowOC	CHON	0.249644	1.05554	0.206995	0	0	0.138309
306	C11H16O6N0S0	4	0.545455	1.45455	243.087	0	11	16	0	6	0	0	0.125	-0.363636	78	Highly_Unsaturated_and_Phenolic_HighOC	CHO	0.892687	4.70384	0.947848	0.720561	0.374576	0.522881
307	C11H16O6N0S1	4	0.545455	1.45455	275.059	0	11	16	0	6	1	0	0	-0.181818	62	Highly_Unsaturated_and_Phenolic_HighOC	CHOS	0.272108	1.14882	0.224825	0	0	0.101647
308	C11H16O6N2S0	5	0.545455	1.45455	271.094	0.181818	11	16	2	6	0	0	0	0.181818	75	Highly_Unsaturated_and_Phenolic_HighOC	CHON	0.261988	1.7907	0.211767	0.199734	0	0.14631
309	C11H16O7N0S0	4	0.636364	1.45455	259.082	0	11	16	0	7	0	0	0.0666667	-0.181818	78	Highly_Unsaturated_and_Phenolic_HighOC	CHO	0.765422	5.53661	0.830238	0.550207	0.295979	0.43313
310	C11H16O7N0S1	4	0.636364	1.45455	291.054	0	11	16	0	7	1	0	0	0	75	Highly_Unsaturated_and_Phenolic_HighOC	CHOS	0.429295	1.82398	0.352	0.178283	0.131667	0.201642
311	C11H16O7N2S0	5	0.636364	1.45455	287.088	0.181818	11	16	2	7	0	0	0	0.363636	75	Highly_Unsaturated_and_Phenolic_HighOC	CHON	0.214095	1.08018	0.209274	0	0	0.0998685
312	C11H16O8N0S0	4	0.727273	1.45455	275.077	0	11	16	0	8	0	0	0	0	78	Highly_Unsaturated_and_Phenolic_HighOC	CHO	0.422276	2.37844	0.565364	0.281614	0.198944	0.303797
313	C11H16O8N0S1	4	0.727273	1.45455	307.049	0	11	16	0	8	1	0	0	0.181818	75	Highly_Unsaturated_and_Phenolic_HighOC	CHOS	0.444619	1.54961	0.374516	0.17628	0.105244	0.154142
314	C11H16O8N2S0	5	0.727273	1.45455	303.083	0.181818	11	16	2	8	0	0	0	0.545455	73	Highly_Unsaturated_and_Phenolic_HighOC	CHON	0.124058	0.337182	0.0917279	0	0	0.0982598
315	C11H16O9N0S0	4	0.818182	1.45455	291.072	0	11	16	0	9	0	0	0	0.181818	76	Highly_Unsaturated_and_Phenolic_HighOC	CHO	0.228239	0.598201	0.238203	0.145481	0.110054	0.154989
316	C11H16O9N0S1	4	0.818182	1.45455	323.044	0	11	16	0	9	1	0	0	0.363636	62	Highly_Unsaturated_and_Phenolic_HighOC	CHOS	0.227967	0.588975	0.192488	0	0	0.107827
317	C11H16O9N2S0	5	0.818182	1.45455	319.078	0.181818	11	16	2	9	0	0	0	0.727273	32	Highly_Unsaturated_and_Phenolic_HighOC	CHON	0	0	0.0620963	0	0	0
318	C11H17O10N1S0	4	0.909091	1.54545	322.078	0.0909091	11	17	1	10	0	0	0	0.545455	36	Sugars_w_X	CHON	0	0.211341	0	0	0	0
319	C11H17O4N1S0	4	0.363636	1.54545	226.108	0.0909091	11	17	1	4	0	0	0.125	-0.545455	40	Peptide_like	CHON	0	0.260114	0	0	0	0
320	C11H17O5N1S0	4	0.454545	1.54545	242.103	0.0909091	11	17	1	5	0	0	0.0666667	-0.363636	62	Peptide_like	CHON	0.117357	0.874742	0.111901	0	0	0
321	C11H17O6N1S0	4	0.545455	1.54545	258.098	0.0909091	11	17	1	6	0	0	0	-0.181818	69	Peptide_like	CHON	0.156899	1.59296	0.148818	0	0	0
322	C11H17O6N1S1	4	0.545455	1.54545	290.07	0.0909091	11	17	1	6	1	0	0	0	16	Peptide_like	CHONS	0.0795389	0	0	0	0	0
323	C11H17O7N1S0	4	0.636364	1.54545	274.093	0.0909091	11	17	1	7	0	0	0	0	68	Peptide_like	CHON	0.183372	1.18786	0.136143	0	0	0
324	C11H17O7N1S1	4	0.636364	1.54545	306.065	0.0909091	11	17	1	7	1	0	0	0.181818	28	Peptide_like	CHONS	0.126418	0	0.104488	0	0	0
325	C11H17O8N1S0	4	0.727273	1.54545	290.088	0.0909091	11	17	1	8	0	0	0	0.181818	69	Peptide_like	CHON	0.130699	1.30759	0.109963	0	0	0
326	C11H17O8N1S1	4	0.727273	1.54545	322.06	0.0909091	11	17	1	8	1	0	0	0.363636	28	Peptide_like	CHONS	0.0899313	0	0.0807572	0	0	0
327	C11H17O9N1S0	4	0.818182	1.54545	306.083	0.0909091	11	17	1	9	0	0	0	0.363636	59	Peptide_like	CHON	0	0.293619	0.070319	0	0	0
328	C11H18O10N0S0	3	0.909091	1.63636	309.083	0	11	18	0	10	0	0	0	0.181818	60	Sugars_wo_X	CHO	0	0.315256	0	0	0	0
329	C11H18O10N0S1	3	0.909091	1.63636	341.055	0	11	18	0	10	1	0	0	0.363636	12	Sugars_w_X	CHOS	0	0.153159	0	0	0	0
330	C11H18O11N0S0	3	1	1.63636	325.078	0	11	18	0	11	0	0	0	0.363636	50	Sugars_wo_X	CHO	0	0.186085	0	0	0	0
331	C11H18O3N0S0	3	0.272727	1.63636	197.118	0	11	18	0	3	0	0	0.157895	-1.09091	36	Aliphatic_LowOC	CHO	0	0.264637	0	0	0	0
332	C11H18O4N0S0	3	0.363636	1.63636	213.113	0	11	18	0	4	0	0	0.111111	-0.909091	48	Aliphatic_LowOC	CHO	0.0966478	0.403866	0.11516	0.135966	0	0
333	C11H18O4N2S0	4	0.363636	1.63636	241.119	0.181818	11	18	2	4	0	0	0	-0.363636	53	Peptide_like	CHON	0	0.555976	0.0661225	0	0	0
334	C11H18O5N0S0	3	0.454545	1.63636	229.108	0	11	18	0	5	0	0	0.0588235	-0.727273	63	Aliphatic_LowOC	CHO	0.12545	0.880748	0.126855	0.137468	0	0
335	C11H18O5N0S1	3	0.454545	1.63636	261.08	0	11	18	0	5	1	0	0	-0.545455	40	Aliphatic_LowOC	CHOS	0	0.468524	0	0	0	0
336	C11H18O5N2S0	4	0.454545	1.63636	257.114	0.181818	11	18	2	5	0	0	0	-0.181818	62	Peptide_like	CHON	0.0864218	0.685871	0	0	0	0
337	C11H18O6N0S0	3	0.545455	1.63636	245.103	0	11	18	0	6	0	0	0	-0.545455	74	Aliphatic_HighOC	CHO	0.143073	1.95547	0.166137	0.169686	0	0.102155
338	C11H18O6N0S1	3	0.545455	1.63636	277.075	0	11	18	0	6	1	0	0	-0.363636	55	Aliphatic_HighOC	CHOS	0.189241	1.11286	0.138742	0	0	0.108293
339	C11H18O6N2S0	4	0.545455	1.63636	273.109	0.181818	11	18	2	6	0	0	0	0	59	Peptide_like	CHON	0.100732	0.928436	0	0	0	0
340	C11H18O7N0S0	3	0.636364	1.63636	261.098	0	11	18	0	7	0	0	0	-0.363636	70	Aliphatic_HighOC	CHO	0.125828	1.1684	0.135952	0.123029	0	0
341	C11H18O7N0S1	3	0.636364	1.63636	293.07	0	11	18	0	7	1	0	0	-0.181818	73	Aliphatic_HighOC	CHOS	0.324585	1.7544	0.21624	0.159837	0	0.113289
342	C11H18O7N2S0	4	0.636364	1.63636	289.104	0.181818	11	18	2	7	0	0	0	0.181818	69	Peptide_like	CHON	0.0722627	0.735477	0.0927717	0	0	0
343	C11H18O8N0S0	3	0.727273	1.63636	277.093	0	11	18	0	8	0	0	0	-0.181818	66	Aliphatic_HighOC	CHO	0.0883581	0.521712	0.0907267	0	0	0
344	C11H18O8N0S1	3	0.727273	1.63636	309.065	0	11	18	0	8	1	0	0	0	68	Aliphatic_HighOC	CHOS	0.216546	1.52038	0.168629	0	0	0.0825958
345	C11H18O8N2S0	4	0.727273	1.63636	305.099	0.181818	11	18	2	8	0	0	0	0.363636	44	Peptide_like	CHON	0	0.176895	0	0	0	0
346	C11H18O9N0S0	3	0.818182	1.63636	293.088	0	11	18	0	9	0	0	0	0	54	Aliphatic_HighOC	CHO	0.0676035	0.391854	0	0	0	0
347	C11H18O9N0S1	3	0.818182	1.63636	325.06	0	11	18	0	9	1	0	0	0.181818	45	Aliphatic_HighOC	CHOS	0.0774362	0.433102	0.0986938	0	0	0
348	C11H19O4N1S0	3	0.363636	1.72727	228.124	0.0909091	11	19	1	4	0	0	0	-0.727273	25	Peptide_like	CHON	0	0.207578	0	0	0	0
349	C11H19O5N1S0	3	0.454545	1.72727	244.119	0.0909091	11	19	1	5	0	0	0	-0.545455	31	Peptide_like	CHON	0	0.233231	0	0	0	0
350	C11H19O6N1S0	3	0.545455	1.72727	260.114	0.0909091	11	19	1	6	0	0	0	-0.363636	31	Peptide_like	CHON	0	0.346336	0	0	0	0
351	C11H19O7N1S0	3	0.636364	1.72727	276.109	0.0909091	11	19	1	7	0	0	0	-0.181818	48	Peptide_like	CHON	0	0.404011	0	0	0	0
352	C11H19O8N1S0	3	0.727273	1.72727	292.104	0.0909091	11	19	1	8	0	0	0	0	28	Peptide_like	CHON	0	0.386354	0	0	0	0
353	C11H19O9N1S0	3	0.818182	1.72727	308.099	0.0909091	11	19	1	9	0	0	0	0.181818	32	Peptide_like	CHON	0	0.251503	0	0	0	0
354	C11H20O10N0S0	2	0.909091	1.81818	311.098	0	11	20	0	10	0	0	0	0	31	Sugars_wo_X	CHO	0	0.17277	0	0	0	0
355	C11H20O5N0S0	2	0.454545	1.81818	231.124	0	11	20	0	5	0	0	0	-0.909091	23	Aliphatic_LowOC	CHO	0	0.178523	0	0	0	0
356	C11H20O5N0S1	2	0.454545	1.81818	263.096	0	11	20	0	5	1	0	0	-0.727273	28	Aliphatic_LowOC	CHOS	0	0.301434	0	0	0	0
357	C11H20O6N0S0	2	0.545455	1.81818	247.119	0	11	20	0	6	0	0	0	-0.727273	28	Aliphatic_HighOC	CHO	0	0.199581	0	0	0	0
358	C11H20O6N0S1	2	0.545455	1.81818	279.091	0	11	20	0	6	1	0	0	-0.545455	54	Aliphatic_HighOC	CHOS	0.105694	0.871449	0	0	0	0
359	C11H20O7N0S0	2	0.636364	1.81818	263.114	0	11	20	0	7	0	0	0	-0.545455	16	Aliphatic_HighOC	CHO	0	0.166221	0	0	0	0
360	C11H20O7N0S1	2	0.636364	1.81818	295.086	0	11	20	0	7	1	0	0	-0.363636	61	Aliphatic_HighOC	CHOS	0.113696	1.10479	0.0683805	0	0	0
361	C11H20O7N2S0	3	0.636364	1.81818	291.12	0.181818	11	20	2	7	0	0	0	0	10	Peptide_like	CHON	0	0.132282	0	0	0	0
362	C11H20O8N0S0	2	0.727273	1.81818	279.109	0	11	20	0	8	0	0	0	-0.363636	25	Aliphatic_HighOC	CHO	0	0.26612	0	0	0	0
363	C11H20O8N0S1	2	0.727273	1.81818	311.081	0	11	20	0	8	1	0	0	-0.181818	35	Aliphatic_HighOC	CHOS	0	0.445295	0	0	0	0
364	C11H20O9N0S0	2	0.818182	1.81818	295.103	0	11	20	0	9	0	0	0	-0.181818	37	Aliphatic_HighOC	CHO	0	0.250598	0	0	0	0
365	C11H20O9N0S1	2	0.818182	1.81818	327.076	0	11	20	0	9	1	0	0	0	28	Aliphatic_HighOC	CHOS	0	0.252914	0	0	0	0
366	C11H22O6N0S1	1	0.545455	2	281.106	0	11	22	0	6	1	0	0	-0.727273	32	Aliphatic_HighOC	CHOS	0	0.327268	0	0	0	0
367	C11H22O7N0S1	1	0.636364	2	297.101	0	11	22	0	7	1	0	0	-0.545455	29	Aliphatic_HighOC	CHOS	0	0.189161	0	0	0	0
368	C11H5O3N1S0	10	0.272727	0.454545	198.02	0.0909091	11	5	1	3	0	0.857143	0.882353	0.363636	49	Condensed_aromatics.X	CHON	0.122788	0	0.0803524	0	0	0.0770499
369	C11H5O4N1S0	10	0.363636	0.454545	214.015	0.0909091	11	5	1	4	0	0.833333	0.875	0.545455	73	Condensed_aromatics.X	CHON	0.384261	0	0.26564	0.148319	0.139524	0.177045
370	C11H5O5N1S0	10	0.454545	0.454545	230.009	0.0909091	11	5	1	5	0	0.8	0.866667	0.727273	70	Condensed_aromatics.X	CHON	0.422337	0	0.315488	0.16568	0.144238	0.161889
371	C11H5O6N1S0	10	0.545455	0.454545	246.004	0.0909091	11	5	1	6	0	0.75	0.857143	0.909091	76	Condensed_aromatics.X	CHON	0.377787	0.151314	0.28215	0.145314	0.117622	0.124889
372	C11H5O6N1S1	10	0.545455	0.454545	277.976	0.0909091	11	5	1	6	1	0.666667	0.833333	1.09091	35	Condensed_aromatics.X	CHONS	0.0681027	0	0	0	0	0
373	C11H5O7N1S0	10	0.636364	0.454545	261.999	0.0909091	11	5	1	7	0	0.666667	0.846154	1.09091	61	Condensed_aromatics.X	CHON	0.175067	0	0.142044	0	0	0.10025
374	C11H5O8N1S0	10	0.727273	0.454545	277.994	0.0909091	11	5	1	8	0	0.5	0.833333	1.27273	75	Condensed_aromatics.X	CHON	0.270535	0.198279	0.213726	0	0.106238	0.157825
375	C11H5O8N1S1	10	0.727273	0.454545	309.966	0.0909091	11	5	1	8	1	0	0.8	1.45455	28	Condensed_aromatics.X	CHONS	0	0	0.0702338	0	0	0
376	C11H6O2N2S0	10	0.181818	0.545455	197.036	0.181818	11	6	2	2	0	0.857143	0.875	0.363636	11	Condensed_aromatics.X	CHON	0.138111	0	0	0	0	0
377	C11H6O3N0S0	9	0.272727	0.545455	185.024	0	11	6	0	3	0	0.75	0.789474	0	67	Condensed_aromatics	CHO	0.469443	0.253312	0.0743452	0.231117	0.262661	0.252444
378	C11H6O3N2S0	10	0.272727	0.545455	213.031	0.181818	11	6	2	3	0	0.833333	0.866667	0.545455	55	Condensed_aromatics.X	CHON	0.448522	0	0.232707	0	0.161201	0.191312
379	C11H6O4N0S0	9	0.363636	0.545455	201.019	0	11	6	0	4	0	0.714286	0.777778	0.181818	73	Condensed_aromatics	CHO	1.14412	0.50742	1.05617	0.448713	0.385126	0.504338
380	C11H6O4N2S0	10	0.363636	0.545455	229.025	0.181818	11	6	2	4	0	0.8	0.857143	0.727273	74	Condensed_aromatics.X	CHON	0.62374	0.168609	0.33794	0.179201	0.225913	0.256085
381	C11H6O5N0S0	9	0.454545	0.545455	217.014	0	11	6	0	5	0	0.666667	0.764706	0.363636	76	Condensed_aromatics	CHO	1.63968	0.851983	1.5497	0.762294	0.579837	0.682272
382	C11H6O5N0S1	9	0.454545	0.545455	248.986	0	11	6	0	5	1	0.6	0.733333	0.545455	45	Condensed_aromatics.X	CHOS	0.190905	0	0.109324	0	0	0
383	C11H6O5N2S0	10	0.454545	0.545455	245.02	0.181818	11	6	2	5	0	0.75	0.846154	0.909091	73	Condensed_aromatics.X	CHON	0.47569	0.144222	0.263446	0.159837	0.153794	0.22154
384	C11H6O6N0S0	9	0.545455	0.545455	233.009	0	11	6	0	6	0	0.6	0.75	0.545455	77	Condensed_aromatics	CHO	1.73063	0.714057	1.46914	0.662385	0.561206	0.612335
385	C11H6O6N0S1	9	0.545455	0.545455	264.981	0	11	6	0	6	1	0.5	0.714286	0.727273	60	Condensed_aromatics.X	CHOS	0.196881	0	0.125215	0	0	0
386	C11H6O6N2S0	10	0.545455	0.545455	261.015	0.181818	11	6	2	6	0	0.666667	0.833333	1.09091	72	Condensed_aromatics.X	CHON	0.308716	0	0.148648	0.120274	0.103224	0.1182
387	C11H6O7N0S0	9	0.636364	0.545455	249.004	0	11	6	0	7	0	0.5	0.733333	0.727273	78	Condensed_aromatics	CHO	1.35933	0.592484	1.26666	0.462485	0.468404	0.596671
388	C11H6O7N0S1	9	0.636364	0.545455	280.976	0	11	6	0	7	1	0.333333	0.692308	0.909091	71	Condensed_aromatics.X	CHOS	0.221069	0.207976	0.154549	0	0	0
389	C11H6O7N2S0	10	0.636364	0.545455	277.01	0.181818	11	6	2	7	0	0.5	0.818182	1.27273	72	Condensed_aromatics.X	CHON	0.259886	0	0.190507	0	0	0.110833
390	C11H6O8N0S0	9	0.727273	0.545455	264.999	0	11	6	0	8	0	0.333333	0.714286	0.909091	78	Condensed_aromatics	CHO	0.843024	0.757656	0.78955	0.265338	0.316919	0.392235
391	C11H6O8N0S1	9	0.727273	0.545455	296.971	0	11	6	0	8	1	0	0.666667	1.09091	55	Condensed_aromatics.X	CHOS	0.100793	0	0.0676349	0	0	0
392	C11H6O8N2S0	10	0.727273	0.545455	293.005	0.181818	11	6	2	8	0	0	0.8	1.45455	65	Condensed_aromatics.X	CHON	0.142619	0	0.111049	0	0.0897237	0.12781
393	C11H6O9N0S0	9	0.818182	0.545455	280.994	0	11	6	0	9	0	0	0.692308	1.09091	68	Condensed_aromatics	CHO	0.18965	0	0.181602	0	0.114544	0.135049
394	C11H7O2N1S0	9	0.181818	0.636364	184.04	0.0909091	11	7	1	2	0	0.75	0.777778	0	12	Condensed_aromatics.X	CHON	0	0	0	0	0.153633	0.154989
395	C11H7O3N1S0	9	0.272727	0.636364	200.035	0.0909091	11	7	1	3	0	0.714286	0.764706	0.181818	64	Condensed_aromatics.X	CHON	0.573548	0.218903	0.469355	0.23095	0.256152	0.240379
396	C11H7O4N1S0	9	0.363636	0.636364	216.03	0.0909091	11	7	1	4	0	0.666667	0.75	0.363636	76	Condensed_aromatics.X	CHON	0.809397	0.349448	0.676562	0.343212	0.322755	0.41717
397	C11H7O5N1S0	9	0.454545	0.636364	232.025	0.0909091	11	7	1	5	0	0.6	0.733333	0.545455	78	Condensed_aromatics.X	CHON	0.899177	0.463929	0.756681	0.381606	0.35463	0.450953
398	C11H7O6N1S0	9	0.545455	0.636364	248.02	0.0909091	11	7	1	6	0	0.5	0.714286	0.727273	78	Condensed_aromatics.X	CHON	0.882733	0.350353	0.727305	0.356316	0.329008	0.399432
399	C11H7O6N1S1	9	0.545455	0.636364	279.992	0.0909091	11	7	1	6	1	0.333333	0.666667	0.909091	39	Condensed_aromatics.X	CHONS	0.24016	0	0.173891	0	0	0
400	C11H7O7N1S0	9	0.636364	0.636364	264.015	0.0909091	11	7	1	7	0	0.333333	0.692308	0.909091	78	Condensed_aromatics.X	CHON	0.522857	0.3209	0.407897	0.227361	0.21998	0.285085
401	C11H7O7N1S1	9	0.636364	0.636364	295.987	0.0909091	11	7	1	7	1	0	0.636364	1.09091	48	Polyphenolic_HighOC	CHONS	0.16652	0	0.126621	0	0	0
402	C11H7O8N1S0	9	0.727273	0.636364	280.01	0.0909091	11	7	1	8	0	0	0.666667	1.09091	78	Condensed_aromatics.X	CHON	0.249644	0.137601	0.256161	0.143561	0.11108	0.152533
403	C11H7O8N1S1	9	0.727273	0.636364	311.982	0.0909091	11	7	1	8	1	0	0.6	1.27273	40	Polyphenolic_HighOC	CHONS	0.101488	0	0	0	0	0
404	C11H7O9N1S0	9	0.818182	0.636364	296.005	0.0909091	11	7	1	9	0	0	0.636364	1.27273	51	Polyphenolic_HighOC	CHON	0.0845006	0	0.0968618	0	0	0
405	C11H8O10N0S0	8	0.909091	0.727273	299.004	0	11	8	0	10	0	0	0.5	1.09091	41	Sugars_wo_X	CHO	0.0706743	0	0.101761	0	0	0
406	C11H8O10N0S1	8	0.909091	0.727273	330.977	0	11	8	0	10	1	0	0.4	1.27273	19	Sugars_w_X	CHOS	0.0859226	0	0	0	0	0
407	C11H8O2N0S0	8	0.181818	0.727273	171.045	0	11	8	0	2	0	0.666667	0.7	-0.363636	61	Condensed_aromatics	CHO	0.0918071	0.30053	0.0849964	0.261248	0.27645	0.25672
408	C11H8O2N2S0	9	0.181818	0.727273	199.051	0.181818	11	8	2	2	0	0.714286	0.75	0.181818	11	Condensed_aromatics.X	CHON	0.328306	0	0	0	0	0
409	C11H8O3N0S0	8	0.272727	0.727273	187.04	0	11	8	0	3	0	0.625	0.684211	-0.181818	66	Condensed_aromatics	CHO	1.14707	0.97247	0	0.695772	0.550047	0.691036
410	C11H8O3N2S0	9	0.272727	0.727273	215.046	0.181818	11	8	2	3	0	0.666667	0.733333	0.363636	55	Condensed_aromatics.X	CHON	0.516609	0	0.387	0	0.235084	0.307226
411	C11H8O4N0S0	8	0.363636	0.727273	203.035	0	11	8	0	4	0	0.571429	0.666667	0	74	Condensed_aromatics	CHO	2.25492	1.44443	2.12046	1.25908	0.940207	1.12065
412	C11H8O4N2S0	9	0.363636	0.727273	231.041	0.181818	11	8	2	4	0	0.6	0.714286	0.545455	75	Condensed_aromatics.X	CHON	0.66714	0.222557	0.504035	0.254821	0.263431	0.421446
413	C11H8O5N0S0	8	0.454545	0.727273	219.03	0	11	8	0	5	0	0.5	0.647059	0.181818	76	Polyphenolic_LowOC	CHO	2.47967	1.48025	2.48113	1.49596	1.08691	1.31819
414	C11H8O5N0S1	8	0.454545	0.727273	251.002	0	11	8	0	5	1	0.4	0.6	0.363636	51	Polyphenolic_LowOC	CHOS	0.280685	0.281968	0.22638	0	0	0
415	C11H8O5N2S0	9	0.454545	0.727273	247.036	0.181818	11	8	2	5	0	0.5	0.692308	0.727273	78	Condensed_aromatics.X	CHON	0.87877	0.324338	0.58215	0.348721	0.304637	0.40684
416	C11H8O6N0S0	8	0.545455	0.727273	235.025	0	11	8	0	6	0	0.4	0.625	0.363636	77	Polyphenolic_HighOC	CHO	2.4659	1.88759	2.3861	1.08539	0.976956	1.14737
417	C11H8O6N0S1	8	0.545455	0.727273	266.997	0	11	8	0	6	1	0.25	0.571429	0.545455	67	Polyphenolic_HighOC	CHOS	0.295677	0.298106	0.207911	0	0	0.0853476
418	C11H8O6N2S0	9	0.545455	0.727273	263.031	0.181818	11	8	2	6	0	0.333333	0.666667	0.909091	78	Condensed_aromatics.X	CHON	0.674749	0.289494	0.436123	0.292047	0.244511	0.283518
419	C11H8O7N0S0	8	0.636364	0.727273	251.02	0	11	8	0	7	0	0.25	0.6	0.545455	78	Polyphenolic_HighOC	CHO	1.59712	1.38553	1.45052	0.667226	0.6348	0.810082
420	C11H8O7N0S1	8	0.636364	0.727273	282.992	0	11	8	0	7	1	0	0.538462	0.727273	74	Polyphenolic_HighOC	CHOS	0.326097	0.343587	0.227999	0	0.0929945	0.114093
421	C11H8O7N2S0	9	0.636364	0.727273	279.026	0.181818	11	8	2	7	0	0	0.636364	1.09091	77	Polyphenolic_HighOC	CHON	0.416997	0.189125	0.284471	0.155914	0.162356	0.196858
422	C11H8O8N0S0	8	0.727273	0.727273	267.015	0	11	8	0	8	0	0	0.571429	0.727273	78	Polyphenolic_HighOC	CHO	1.0845	0.932272	1.05385	0.429015	0.421939	0.577154
423	C11H8O8N0S1	8	0.727273	0.727273	298.987	0	11	8	0	8	1	0	0.5	0.909091	71	Highly_Unsaturated_and_Phenolic_HighOC	CHOS	0.29604	0.141436	0.204971	0	0	0.0902584
424	C11H8O8N2S0	9	0.727273	0.727273	295.021	0.181818	11	8	2	8	0	0	0.6	1.27273	61	Polyphenolic_HighOC	CHON	0.143739	0	0.135376	0	0	0.0805637
425	C11H8O9N0S0	8	0.818182	0.727273	283.01	0	11	8	0	9	0	0	0.538462	0.909091	78	Polyphenolic_HighOC	CHO	0.46203	0.16633	0.503076	0.214007	0.280266	0.331738
426	C11H8O9N0S1	8	0.818182	0.727273	314.982	0	11	8	0	9	1	0	0.454545	1.09091	54	Highly_Unsaturated_and_Phenolic_HighOC	CHOS	0.155704	0	0.117738	0	0	0
427	C11H9O10N1S0	8	0.909091	0.818182	314.015	0.0909091	11	9	1	10	0	0	0.4	1.27273	1	Sugars_w_X	CHON	0	0	0.0584749	0	0	0
428	C11H9O2N1S0	8	0.181818	0.818182	186.056	0.0909091	11	9	1	2	0	0.625	0.666667	-0.181818	15	Condensed_aromatics.X	CHON	0	0	0	0	0.187721	0.234071
429	C11H9O3N1S0	8	0.272727	0.818182	202.051	0.0909091	11	9	1	3	0	0.571429	0.647059	0	65	Polyphenolic_LowOC	CHON	0.803663	0.600589	0.714417	0.43853	0.359183	0.497099
430	C11H9O4N1S0	8	0.363636	0.818182	218.046	0.0909091	11	9	1	4	0	0.5	0.625	0.181818	76	Polyphenolic_LowOC	CHON	1.08982	0.596573	0.975541	0.635259	0.544339	0.676049
431	C11H9O5N1S0	8	0.454545	0.818182	234.041	0.0909091	11	9	1	5	0	0.4	0.6	0.363636	78	Polyphenolic_LowOC	CHON	1.12351	0.9411	1.06693	0.61506	0.480012	0.649209
432	C11H9O6N1S0	8	0.545455	0.818182	250.036	0.0909091	11	9	1	6	0	0.25	0.571429	0.545455	78	Polyphenolic_HighOC	CHON	1.00003	0.791487	0.8921	0.50547	0.421137	0.511577
433	C11H9O6N1S1	8	0.545455	0.818182	282.008	0.0909091	11	9	1	6	1	0	0.5	0.727273	39	Highly_Unsaturated_and_Phenolic_HighOC	CHONS	0.277403	0	0.215963	0	0	0
434	C11H9O7N1S0	8	0.636364	0.818182	266.031	0.0909091	11	9	1	7	0	0	0.538462	0.727273	78	Polyphenolic_HighOC	CHON	0.766708	0.625265	0.746967	0.315668	0.325898	0.370644
435	C11H9O7N1S1	8	0.636364	0.818182	298.003	0.0909091	11	9	1	7	1	0	0.454545	0.909091	48	Highly_Unsaturated_and_Phenolic_HighOC	CHONS	0.224458	0	0.179281	0	0	0
436	C11H9O8N1S0	8	0.727273	0.818182	282.026	0.0909091	11	9	1	8	0	0	0.5	0.909091	78	Highly_Unsaturated_and_Phenolic_HighOC	CHON	0.434635	0.20642	0.38881	0.222353	0.185091	0.233055
437	C11H9O8N1S1	8	0.727273	0.818182	313.998	0.0909091	11	9	1	8	1	0	0.4	1.09091	48	Highly_Unsaturated_and_Phenolic_HighOC	CHONS	0.17782	0	0.117355	0	0	0
438	C11H9O9N1S0	8	0.818182	0.818182	298.02	0.0909091	11	9	1	9	0	0	0.454545	1.09091	56	Highly_Unsaturated_and_Phenolic_HighOC	CHON	0.118628	0	0.138423	0	0	0.079336
439	C11H9O9N1S1	8	0.818182	0.818182	329.993	0.0909091	11	9	1	9	1	0	0.333333	1.27273	29	Highly_Unsaturated_and_Phenolic_HighOC	CHONS	0.0899615	0	0.0651426	0	0	0
440	C12H10O10N0S0	8	0.833333	0.833333	313.02	0	12	10	0	10	0	0	0.428571	0.833333	78	Highly_Unsaturated_and_Phenolic_HighOC	CHO	0.706259	0.292968	1.01861	0.284953	0.345074	0.352016
441	C12H10O10N0S1	8	0.833333	0.833333	344.992	0	12	10	0	10	1	0	0.333333	1	51	Highly_Unsaturated_and_Phenolic_HighOC	CHOS	0.225002	0	0.190038	0	0	0.115363
442	C12H10O11N0S0	8	0.916667	0.833333	329.015	0	12	10	0	11	0	0	0.384615	1	65	Sugars_wo_X	CHO	0.262911	0	0.379139	0.124281	0.148406	0.117311
443	C12H10O11N0S1	8	0.916667	0.833333	360.987	0	12	10	0	11	1	0	0.272727	1.16667	7	Sugars_w_X	CHOS	0	0	0.0720019	0	0	0
444	C12H10O12N0S0	8	1	0.833333	345.01	0	12	10	0	12	0	0	0.333333	1.16667	10	Sugars_wo_X	CHO	0.0883127	0	0.117568	0	0	0
445	C12H10O2N0S0	8	0.166667	0.833333	185.061	0	12	10	0	2	0	0.6	0.636364	-0.5	67	Polyphenolic_LowOC	CHO	0.904244	0.856904	0.128922	0.650283	0.720804	0.829556
446	C12H10O2N2S0	9	0.166667	0.833333	213.067	0.166667	12	10	2	2	0	0.625	0.666667	0	14	Condensed_aromatics.X	CHON	0.404411	0	0	0	0	0
447	C12H10O3N0S0	8	0.25	0.833333	201.056	0	12	10	0	3	0	0.555556	0.619048	-0.333333	72	Polyphenolic_LowOC	CHO	2.29819	1.86472	2.32579	1.51916	1.28823	1.65264
448	C12H10O3N2S0	9	0.25	0.833333	229.062	0.166667	12	10	2	3	0	0.571429	0.647059	0.166667	56	Polyphenolic_LowOC	CHON	0.69449	0	0.542379	0	0.391635	0.463188
449	C12H10O4N0S0	8	0.333333	0.833333	217.051	0	12	10	0	4	0	0.5	0.6	-0.166667	76	Polyphenolic_LowOC	CHO	3.3022	2.36715	3.39936	2.40515	1.65068	2.20621
450	C12H10O4N2S0	9	0.333333	0.833333	245.057	0.166667	12	10	2	4	0	0.5	0.625	0.333333	76	Polyphenolic_LowOC	CHON	1.01072	0.490885	0.784352	0.618482	0.491652	0.658184
451	C12H10O5N0S0	8	0.416667	0.833333	233.046	0	12	10	0	5	0	0.428571	0.578947	0	78	Polyphenolic_LowOC	CHO	3.64523	2.57817	3.8953	2.14057	1.69131	2.0494
452	C12H10O5N0S1	8	0.416667	0.833333	265.018	0	12	10	0	5	1	0.333333	0.529412	0.166667	51	Polyphenolic_LowOC	CHOS	0.355036	0.392216	0.289776	0	0	0
453	C12H10O5N2S0	9	0.416667	0.833333	261.052	0.166667	12	10	2	5	0	0.4	0.6	0.5	78	Polyphenolic_LowOC	CHON	1.01331	0.584995	0.760728	0.584512	0.524136	0.613605
454	C12H10O6N0S0	8	0.5	0.833333	249.04	0	12	10	0	6	0	0.333333	0.555556	0.166667	78	Polyphenolic_HighOC	CHO	3.55981	3.90519	3.67001	1.8143	1.53037	1.7694
455	C12H10O6N0S1	8	0.5	0.833333	281.013	0	12	10	0	6	1	0.2	0.5	0.333333	67	Highly_Unsaturated_and_Phenolic_HighOC	CHOS	0.454497	0.51462	0.360542	0	0	0.154481
456	C12H10O6N2S0	9	0.5	0.833333	277.047	0.166667	12	10	2	6	0	0.25	0.571429	0.666667	78	Polyphenolic_HighOC	CHON	0.993465	0.491283	0.780411	0.555633	0.478377	0.526225
457	C12H10O7N0S0	8	0.583333	0.833333	265.035	0	12	10	0	7	0	0.2	0.529412	0.333333	78	Polyphenolic_HighOC	CHO	3.16455	3.51948	3.11063	1.27043	1.20896	1.43105
458	C12H10O7N0S1	8	0.583333	0.833333	297.007	0	12	10	0	7	1	0	0.466667	0.5	75	Highly_Unsaturated_and_Phenolic_HighOC	CHOS	0.505672	0.612421	0.364781	0.159086	0.146418	0.162059
459	C12H10O7N2S0	9	0.583333	0.833333	293.042	0.166667	12	10	2	7	0	0	0.538462	0.833333	78	Polyphenolic_HighOC	CHON	0.842752	0.50221	0.685509	0.504885	0.447496	0.464966
460	C12H10O8N0S0	8	0.666667	0.833333	281.03	0	12	10	0	8	0	0	0.5	0.5	78	Highly_Unsaturated_and_Phenolic_HighOC	CHO	2.67116	2.88966	2.86073	1.15316	1.09214	1.29274
461	C12H10O8N0S1	8	0.666667	0.833333	313.002	0	12	10	0	8	1	0	0.428571	0.666667	75	Highly_Unsaturated_and_Phenolic_HighOC	CHOS	0.55712	0.578301	0.427559	0.132711	0.178838	0.19652
462	C12H10O8N2S0	9	0.666667	0.833333	309.036	0.166667	12	10	2	8	0	0	0.5	1	78	Highly_Unsaturated_and_Phenolic_HighOC	CHON	0.636462	0.258124	0.521801	0.262918	0.278471	0.267007
463	C12H10O9N0S0	8	0.75	0.833333	297.025	0	12	10	0	9	0	0	0.466667	0.666667	78	Highly_Unsaturated_and_Phenolic_HighOC	CHO	1.48106	0.849089	1.85083	0.602958	0.670875	0.811267
464	C12H10O9N0S1	8	0.75	0.833333	328.997	0	12	10	0	9	1	0	0.384615	0.833333	70	Highly_Unsaturated_and_Phenolic_HighOC	CHOS	0.459262	0.412948	0.358944	0	0.130545	0.161889
465	C12H10O9N2S0	9	0.75	0.833333	325.031	0.166667	12	10	2	9	0	0	0.454545	1.16667	71	Highly_Unsaturated_and_Phenolic_HighOC	CHON	0.229329	0.132391	0.249706	0.129873	0.129134	0.165234
466	C12H11O10N1S0	8	0.833333	0.916667	328.031	0.0833333	12	11	1	10	0	0	0.333333	1	75	Highly_Unsaturated_and_Phenolic_HighOC	CHON	0.239358	0.139736	0.315317	0.118522	0.138947	0.155285
467	C12H11O10N1S1	8	0.833333	0.916667	360.003	0.0833333	12	11	1	10	1	0	0.2	1.16667	12	Highly_Unsaturated_and_Phenolic_HighOC	CHONS	0.0804011	0	0.0824614	0	0	0
468	C12H11O11N1S0	8	0.916667	0.916667	344.026	0.0833333	12	11	1	11	0	0	0.272727	1.16667	3	Sugars_w_X	CHON	0	0	0.0790104	0	0	0
469	C12H11O2N1S0	8	0.166667	0.916667	200.072	0.0833333	12	11	1	2	0	0.555556	0.6	-0.333333	28	Polyphenolic_LowOC	CHON	0.492043	0	0.425642	0	0.295113	0.388679
470	C12H11O3N1S0	8	0.25	0.916667	216.067	0.0833333	12	11	1	3	0	0.5	0.578947	-0.166667	68	Polyphenolic_LowOC	CHON	0.992421	0.772346	0.893356	0.704202	0.569768	0.813638
471	C12H11O4N1S0	8	0.333333	0.916667	232.062	0.0833333	12	11	1	4	0	0.428571	0.555556	0	77	Polyphenolic_LowOC	CHON	1.30288	0.820324	1.24148	0.901181	0.672735	0.923286
472	C12H11O5N1S0	8	0.416667	0.916667	248.056	0.0833333	12	11	1	5	0	0.333333	0.529412	0.166667	78	Polyphenolic_LowOC	CHON	1.49531	1.53699	1.42536	0.916456	0.731675	0.95961
473	C12H11O6N1S0	8	0.5	0.916667	264.051	0.0833333	12	11	1	6	0	0.2	0.5	0.333333	78	Highly_Unsaturated_and_Phenolic_HighOC	CHON	1.51125	1.59477	1.4237	0.845927	0.687101	0.823375
474	C12H11O6N1S1	8	0.5	0.916667	296.023	0.0833333	12	11	1	6	1	0	0.428571	0.5	39	Highly_Unsaturated_and_Phenolic_HighOC	CHONS	0.26695	0	0.203565	0	0	0
475	C12H11O7N1S0	8	0.583333	0.916667	280.046	0.0833333	12	11	1	7	0	0	0.466667	0.5	78	Highly_Unsaturated_and_Phenolic_HighOC	CHON	1.50165	1.4957	1.41151	0.804111	0.644644	0.753903
476	C12H11O7N1S1	8	0.583333	0.916667	312.018	0.0833333	12	11	1	7	1	0	0.384615	0.666667	48	Highly_Unsaturated_and_Phenolic_HighOC	CHONS	0.349363	0	0.265938	0	0	0
477	C12H11O8N1S0	8	0.666667	0.916667	296.041	0.0833333	12	11	1	8	0	0	0.428571	0.666667	78	Highly_Unsaturated_and_Phenolic_HighOC	CHON	1.153	1.06159	1.15101	0.591022	0.519711	0.607509
478	C12H11O8N1S1	8	0.666667	0.916667	328.013	0.0833333	12	11	1	8	1	0	0.333333	0.833333	48	Highly_Unsaturated_and_Phenolic_HighOC	CHONS	0.300744	0	0.256949	0	0	0
479	C12H11O9N1S0	8	0.75	0.916667	312.036	0.0833333	12	11	1	9	0	0	0.384615	0.833333	78	Highly_Unsaturated_and_Phenolic_HighOC	CHON	0.669697	0.420184	0.823101	0.305318	0.316246	0.352651
480	C12H11O9N1S1	8	0.75	0.916667	344.008	0.0833333	12	11	1	9	1	0	0.272727	1	43	Highly_Unsaturated_and_Phenolic_HighOC	CHONS	0.214262	0	0.159597	0	0	0
481	C12H12O10N0S0	7	0.833333	1	315.036	0	12	12	0	10	0	0	0.285714	0.666667	78	Highly_Unsaturated_and_Phenolic_HighOC	CHO	1.74396	1.4762	2.66558	0.62132	0.652918	0.836372
482	C12H12O10N0S1	7	0.833333	1	347.008	0	12	12	0	10	1	0	0.166667	0.833333	58	Highly_Unsaturated_and_Phenolic_HighOC	CHOS	0.277917	0.194733	0.302706	0	0	0.147411
483	C12H12O10N2S0	8	0.833333	1	343.042	0.166667	12	12	2	10	0	0	0.2	1.16667	26	Highly_Unsaturated_and_Phenolic_HighOC	CHON	0.095362	0	0.100377	0	0	0
484	C12H12O11N0S0	7	0.916667	1	331.031	0	12	12	0	11	0	0	0.230769	0.833333	78	Sugars_wo_X	CHO	0.461531	0.301217	0.814474	0.166848	0.241882	0.207908
485	C12H12O11N0S1	7	0.916667	1	363.003	0	12	12	0	11	1	0	0.0909091	1	8	Sugars_w_X	CHOS	0.0683447	0	0.0864023	0	0	0
486	C12H12O12N0S0	7	1	1	347.026	0	12	12	0	12	0	0	0.166667	1	13	Sugars_wo_X	CHO	0.0879647	0	0.125897	0	0	0
487	C12H12O2N0S0	7	0.166667	1	187.076	0	12	12	0	2	0	0.5	0.545455	-0.666667	69	Polyphenolic_LowOC	CHO	0.797582	1.10783	0.855694	1.08497	0.799528	1.14529
488	C12H12O2N2S0	8	0.166667	1	215.083	0.166667	12	12	2	2	0	0.5	0.555556	-0.166667	14	Polyphenolic_LowOC	CHON	0.348803	0	0	0	0	0
489	C12H12O3N0S0	7	0.25	1	203.071	0	12	12	0	3	0	0.444444	0.52381	-0.5	72	Polyphenolic_LowOC	CHO	1.8207	1.92356	2.0005	2.25491	1.40778	1.94178
490	C12H12O3N2S0	8	0.25	1	231.078	0.166667	12	12	2	3	0	0.428571	0.529412	0	57	Polyphenolic_LowOC	CHON	0.592412	0	0.516901	0	0.388589	0.542694
491	C12H12O4N0S0	7	0.333333	1	219.066	0	12	12	0	4	0	0.375	0.5	-0.333333	76	Highly_Unsaturated_and_Phenolic_LowOC	CHO	2.5336	3.09358	2.86825	2.69094	1.80919	2.36962
492	C12H12O4N2S0	8	0.333333	1	247.072	0.166667	12	12	2	4	0	0.333333	0.5	0.166667	76	Highly_Unsaturated_and_Phenolic_LowOC	CHON	0.823147	0.620779	0.76616	0.752111	0.532538	0.696751
493	C12H12O5N0S0	7	0.416667	1	235.061	0	12	12	0	5	0	0.285714	0.473684	-0.166667	78	Highly_Unsaturated_and_Phenolic_LowOC	CHO	3.25778	3.15513	3.77277	2.61933	1.79803	2.39278
494	C12H12O5N0S1	7	0.416667	1	267.033	0	12	12	0	5	1	0.166667	0.411765	0	51	Highly_Unsaturated_and_Phenolic_LowOC	CHOS	0.275436	0.511183	0.284578	0	0	0
495	C12H12O5N2S0	8	0.416667	1	263.067	0.166667	12	12	2	5	0	0.2	0.466667	0.333333	78	Highly_Unsaturated_and_Phenolic_LowOC	CHON	0.870949	0.827922	0.775171	0.75979	0.535937	0.692814
496	C12H12O6N0S0	7	0.5	1	251.056	0	12	12	0	6	0	0.166667	0.444444	0	78	Highly_Unsaturated_and_Phenolic_HighOC	CHO	3.05066	4.32128	3.43752	2.12738	1.60358	1.98069
497	C12H12O6N0S1	7	0.5	1	283.028	0	12	12	0	6	1	0	0.375	0.166667	67	Highly_Unsaturated_and_Phenolic_HighOC	CHOS	0.402792	0.801364	0.343181	0	0	0.160238
498	C12H12O6N2S0	8	0.5	1	279.062	0.166667	12	12	2	6	0	0	0.428571	0.5	78	Highly_Unsaturated_and_Phenolic_HighOC	CHON	1.05124	0.967622	0.908779	0.847763	0.600713	0.68278
499	C12H12O7N0S0	7	0.583333	1	267.051	0	12	12	0	7	0	0	0.411765	0.166667	78	Highly_Unsaturated_and_Phenolic_HighOC	CHO	3.34491	4.83862	3.80023	1.89568	1.45671	1.80868
500	C12H12O7N0S1	7	0.583333	1	299.023	0	12	12	0	7	1	0	0.333333	0.333333	75	Highly_Unsaturated_and_Phenolic_HighOC	CHOS	0.533234	1.07971	0.45063	0.173192	0.162612	0.203166
501	C12H12O7N2S0	8	0.583333	1	295.057	0.166667	12	12	2	7	0	0	0.384615	0.666667	78	Highly_Unsaturated_and_Phenolic_HighOC	CHON	0.991392	0.884945	0.838844	0.773896	0.598019	0.736969
502	C12H12O8N0S0	7	0.666667	1	283.046	0	12	12	0	8	0	0	0.375	0.333333	78	Highly_Unsaturated_and_Phenolic_HighOC	CHO	3.92355	4.2601	4.61692	1.72282	1.47435	1.65568
503	C12H12O8N0S1	7	0.666667	1	315.018	0	12	12	0	8	1	0	0.285714	0.5	75	Highly_Unsaturated_and_Phenolic_HighOC	CHOS	0.651968	1.26598	0.572863	0.145314	0.188683	0.231192
504	C12H12O8N2S0	8	0.666667	1	311.052	0.166667	12	12	2	8	0	0	0.333333	0.833333	78	Highly_Unsaturated_and_Phenolic_HighOC	CHON	0.799307	0.625953	0.747371	0.409066	0.371305	0.427754
505	C12H12O9N0S0	7	0.75	1	299.041	0	12	12	0	9	0	0	0.333333	0.5	78	Highly_Unsaturated_and_Phenolic_HighOC	CHO	3.12386	2.7865	4.09045	1.10826	1.0519	1.32737
506	C12H12O9N0S1	7	0.75	1	331.013	0	12	12	0	9	1	0	0.230769	0.666667	71	Highly_Unsaturated_and_Phenolic_HighOC	CHOS	0.535428	0.631018	0.502139	0	0.166428	0.199187
507	C12H12O9N2S0	8	0.75	1	327.047	0.166667	12	12	2	9	0	0	0.272727	1	78	Highly_Unsaturated_and_Phenolic_HighOC	CHON	0.341451	0.311131	0.319237	0.152743	0.175535	0.224588
508	C12H13O10N1S0	7	0.833333	1.08333	330.047	0.0833333	12	13	1	10	0	0	0.166667	0.833333	78	Highly_Unsaturated_and_Phenolic_HighOC	CHON	0.252791	0.347567	0.313954	0.14473	0.142025	0.159138
509	C12H13O10N1S1	7	0.833333	1.08333	362.019	0.0833333	12	13	1	10	1	0	0	1	13	Highly_Unsaturated_and_Phenolic_HighOC	CHONS	0.0891598	0	0.0886391	0	0	0
510	C12H13O11N1S0	7	0.916667	1.08333	346.042	0.0833333	12	13	1	11	0	0	0.0909091	1	9	Sugars_w_X	CHON	0.0836232	0	0.0962227	0	0	0
511	C12H13O2N1S0	7	0.166667	1.08333	202.087	0.0833333	12	13	1	2	0	0.444444	0.5	-0.5	25	Highly_Unsaturated_and_Phenolic_LowOC	CHON	0.340725	0	0.321985	0	0.294696	0.428601
512	C12H13O3N1S0	7	0.25	1.08333	218.082	0.0833333	12	13	1	3	0	0.375	0.473684	-0.333333	69	Highly_Unsaturated_and_Phenolic_LowOC	CHON	0.652891	0.76985	0.634064	0.735919	0.504319	0.758603
513	C12H13O4N1S0	7	0.333333	1.08333	234.077	0.0833333	12	13	1	4	0	0.285714	0.444444	-0.166667	78	Highly_Unsaturated_and_Phenolic_LowOC	CHON	1.03511	1.09708	1.04068	0.883069	0.655579	0.926969
514	C12H13O5N1S0	7	0.416667	1.08333	250.072	0.0833333	12	13	1	5	0	0.166667	0.411765	0	78	Highly_Unsaturated_and_Phenolic_LowOC	CHON	1.16663	1.58391	1.18937	0.991825	0.685434	0.959271
515	C12H13O6N1S0	7	0.5	1.08333	266.067	0.0833333	12	13	1	6	0	0	0.375	0.166667	78	Highly_Unsaturated_and_Phenolic_HighOC	CHON	1.42964	2.34602	1.36797	0.958606	0.680752	0.878453
516	C12H13O6N1S1	7	0.5	1.08333	298.039	0.0833333	12	13	1	6	1	0	0.285714	0.333333	39	Highly_Unsaturated_and_Phenolic_HighOC	CHONS	0.215775	0	0.172741	0	0	0
517	C12H13O7N1S0	7	0.583333	1.08333	282.062	0.0833333	12	13	1	7	0	0	0.333333	0.333333	78	Highly_Unsaturated_and_Phenolic_HighOC	CHON	1.75709	3.01507	1.74598	1.08881	0.802863	0.961345
518	C12H13O7N1S1	7	0.583333	1.08333	314.034	0.0833333	12	13	1	7	1	0	0.230769	0.5	48	Highly_Unsaturated_and_Phenolic_HighOC	CHONS	0.317263	0	0.267323	0	0	0
519	C12H13O8N1S0	7	0.666667	1.08333	298.057	0.0833333	12	13	1	8	0	0	0.285714	0.5	78	Highly_Unsaturated_and_Phenolic_HighOC	CHON	1.54205	2.16297	1.57601	0.817966	0.634126	0.827355
520	C12H13O8N1S1	7	0.666667	1.08333	330.029	0.0833333	12	13	1	8	1	0	0.166667	0.666667	48	Highly_Unsaturated_and_Phenolic_HighOC	CHONS	0.346564	0	0.265449	0	0	0
521	C12H13O9N1S0	7	0.75	1.08333	314.052	0.0833333	12	13	1	9	0	0	0.230769	0.666667	78	Highly_Unsaturated_and_Phenolic_HighOC	CHON	0.817928	1.10602	0.98468	0.401304	0.392982	0.51217
522	C12H13O9N1S1	7	0.75	1.08333	346.024	0.0833333	12	13	1	9	1	0	0.0909091	0.833333	40	Highly_Unsaturated_and_Phenolic_HighOC	CHONS	0.225713	0	0.185117	0	0	0
523	C12H14O10N0S0	6	0.833333	1.16667	317.051	0	12	14	0	10	0	0	0.142857	0.5	78	Highly_Unsaturated_and_Phenolic_HighOC	CHO	1.3469	2.09271	2.27692	0.577334	0.574963	0.772531
524	C12H14O10N0S1	6	0.833333	1.16667	349.023	0	12	14	0	10	1	0	0	0.666667	60	Highly_Unsaturated_and_Phenolic_HighOC	CHOS	0.303724	0.380022	0.317128	0	0.121823	0.175013
525	C12H14O10N2S0	7	0.833333	1.16667	345.058	0.166667	12	14	2	10	0	0	0	1	47	Highly_Unsaturated_and_Phenolic_HighOC	CHON	0.0834871	0	0.103231	0	0	0
526	C12H14O11N0S0	6	0.916667	1.16667	333.046	0	12	14	0	11	0	0	0.0769231	0.666667	78	Sugars_wo_X	CHO	0.320636	0.268581	0.50069	0.138637	0.150811	0.169425
527	C12H14O11N0S1	6	0.916667	1.16667	365.018	0	12	14	0	11	1	0	0	0.833333	14	Sugars_w_X	CHOS	0.0820954	0	0.079756	0	0	0
528	C12H14O12N0S0	6	1	1.16667	349.041	0	12	14	0	12	0	0	0	0.833333	1	Sugars_wo_X	CHO	0	0	0.0877444	0	0	0
529	C12H14O2N0S0	6	0.166667	1.16667	189.092	0	12	14	0	2	0	0.4	0.454545	-0.833333	68	Highly_Unsaturated_and_Phenolic_LowOC	CHO	0.688893	1.10772	0.789614	1.40924	0.864689	1.09991
530	C12H14O2N2S0	7	0.166667	1.16667	217.098	0.166667	12	14	2	2	0	0.375	0.444444	-0.333333	13	Highly_Unsaturated_and_Phenolic_LowOC	CHON	0.20157	0	0	0	0	0
531	C12H14O3N0S0	6	0.25	1.16667	205.087	0	12	14	0	3	0	0.333333	0.428571	-0.666667	72	Highly_Unsaturated_and_Phenolic_LowOC	CHO	1.40878	1.86972	1.65549	2.5584	1.37834	1.97341
532	C12H14O3N2S0	7	0.25	1.16667	233.093	0.166667	12	14	2	3	0	0.285714	0.411765	-0.166667	57	Highly_Unsaturated_and_Phenolic_LowOC	CHON	0.438402	0	0.411732	0	0.284756	0.468777
533	C12H14O4N0S0	6	0.333333	1.16667	221.082	0	12	14	0	4	0	0.25	0.4	-0.5	76	Highly_Unsaturated_and_Phenolic_LowOC	CHO	1.85071	2.60346	2.24235	2.77366	1.71027	2.23673
534	C12H14O4N2S0	7	0.333333	1.16667	249.088	0.166667	12	14	2	4	0	0.166667	0.375	0	76	Highly_Unsaturated_and_Phenolic_LowOC	CHON	0.624376	0.719882	0.571691	0.77231	0.399171	0.606323
535	C12H14O5N0S0	6	0.416667	1.16667	237.077	0	12	14	0	5	0	0.142857	0.368421	-0.333333	78	Highly_Unsaturated_and_Phenolic_LowOC	CHO	2.45965	3.805	2.95736	2.84026	1.78075	2.37703
536	C12H14O5N0S1	6	0.416667	1.16667	269.049	0	12	14	0	5	1	0	0.294118	-0.166667	51	Highly_Unsaturated_and_Phenolic_LowOC	CHOS	0.183191	0.563792	0.15327	0	0	0
537	C12H14O5N2S0	7	0.416667	1.16667	265.083	0.166667	12	14	2	5	0	0	0.333333	0.166667	78	Highly_Unsaturated_and_Phenolic_LowOC	CHON	0.696275	1.08337	0.654642	0.672401	0.473246	0.607128
538	C12H14O6N0S0	6	0.5	1.16667	253.072	0	12	14	0	6	0	0	0.333333	-0.166667	78	Highly_Unsaturated_and_Phenolic_HighOC	CHO	2.86219	5.63882	3.30016	2.44947	1.61246	2.11921
539	C12H14O6N0S1	6	0.5	1.16667	285.044	0	12	14	0	6	1	0	0.25	0	67	Highly_Unsaturated_and_Phenolic_HighOC	CHOS	0.306856	1.05837	0.269475	0	0	0.157444
540	C12H14O6N2S0	7	0.5	1.16667	281.078	0.166667	12	14	2	6	0	0	0.285714	0.333333	78	Highly_Unsaturated_and_Phenolic_HighOC	CHON	0.967612	1.67433	0.839547	0.955184	0.588912	0.685702
541	C12H14O7N0S0	6	0.583333	1.16667	269.067	0	12	14	0	7	0	0	0.294118	0	78	Highly_Unsaturated_and_Phenolic_HighOC	CHO	3.78678	8.87001	4.18107	3.69812	1.61503	2.13695
542	C12H14O7N0S1	6	0.583333	1.16667	301.039	0	12	14	0	7	1	0	0.2	0.166667	75	Highly_Unsaturated_and_Phenolic_HighOC	CHOS	0.490364	1.26052	0.395308	0.191805	0.16258	0.258159
543	C12H14O7N2S0	7	0.583333	1.16667	297.073	0.166667	12	14	2	7	0	0	0.230769	0.5	78	Highly_Unsaturated_and_Phenolic_HighOC	CHON	0.952712	1.70697	0.826233	0.822723	0.47687	0.681934
544	C12H14O8N0S0	6	0.666667	1.16667	285.062	0	12	14	0	8	0	0	0.25	0.166667	78	Highly_Unsaturated_and_Phenolic_HighOC	CHO	4.90498	10.8338	5.73747	6.10578	1.81926	2.25189
545	C12H14O8N0S1	6	0.666667	1.16667	317.034	0	12	14	0	8	1	0	0.142857	0.333333	75	Highly_Unsaturated_and_Phenolic_HighOC	CHOS	0.651514	1.86458	0.55156	0.254321	0.221936	0.292874
546	C12H14O8N2S0	7	0.666667	1.16667	313.068	0.166667	12	14	2	8	0	0	0.166667	0.666667	78	Highly_Unsaturated_and_Phenolic_HighOC	CHON	0.740265	1.30759	0.710582	0.452719	0.386857	0.525506
547	C12H14O9N0S0	6	0.75	1.16667	301.057	0	12	14	0	9	0	0	0.2	0.333333	78	Highly_Unsaturated_and_Phenolic_HighOC	CHO	3.41347	5.56754	4.9676	1.28504	1.18347	1.52897
548	C12H14O9N0S1	6	0.75	1.16667	333.029	0	12	14	0	9	1	0	0.0769231	0.5	72	Highly_Unsaturated_and_Phenolic_HighOC	CHOS	0.606284	1.00199	0.558505	0.195227	0.192114	0.300918
549	C12H14O9N2S0	7	0.75	1.16667	329.063	0.166667	12	14	2	9	0	0	0.0909091	0.833333	78	Highly_Unsaturated_and_Phenolic_HighOC	CHON	0.314646	0.476195	0.302174	0.195477	0.160977	0.212311
550	C12H15O10N1S0	6	0.833333	1.25	332.062	0.0833333	12	15	1	10	0	0	0	0.666667	73	Highly_Unsaturated_and_Phenolic_HighOC	CHON	0.179121	0.242457	0.202308	0	0.106046	0.134202
551	C12H15O10N1S1	6	0.833333	1.25	364.034	0.0833333	12	15	1	10	1	0	0	0.833333	10	Highly_Unsaturated_and_Phenolic_HighOC	CHONS	0.0912927	0	0.0702977	0	0	0
552	C12H15O2N1S0	6	0.166667	1.25	204.103	0.0833333	12	15	1	2	0	0.333333	0.4	-0.666667	15	Highly_Unsaturated_and_Phenolic_LowOC	CHON	0.182631	0	0.18925	0	0.151228	0.279369
553	C12H15O3N1S0	6	0.25	1.25	220.098	0.0833333	12	15	1	3	0	0.25	0.368421	-0.5	65	Highly_Unsaturated_and_Phenolic_LowOC	CHON	0.349106	0.525149	0.36444	0.483268	0.303451	0.475465
554	C12H15O4N1S0	6	0.333333	1.25	236.093	0.0833333	12	15	1	4	0	0.142857	0.333333	-0.333333	78	Highly_Unsaturated_and_Phenolic_LowOC	CHON	0.574698	0.904809	0.616319	0.700863	0.432585	0.636974
555	C12H15O5N1S0	6	0.416667	1.25	252.088	0.0833333	12	15	1	5	0	0	0.294118	-0.166667	78	Highly_Unsaturated_and_Phenolic_LowOC	CHON	0.70219	1.85358	0.72886	0.71355	0.445989	0.621987
556	C12H15O6N1S0	6	0.5	1.25	268.083	0.0833333	12	15	1	6	0	0	0.25	0	78	Highly_Unsaturated_and_Phenolic_HighOC	CHON	1.02727	2.90171	0.998143	0.79543	0.520481	0.644467
557	C12H15O6N1S1	6	0.5	1.25	300.055	0.0833333	12	15	1	6	1	0	0.142857	0.166667	37	Highly_Unsaturated_and_Phenolic_HighOC	CHONS	0.167246	0	0.133566	0	0	0
558	C12H15O7N1S0	6	0.583333	1.25	284.078	0.0833333	12	15	1	7	0	0	0.2	0.166667	78	Highly_Unsaturated_and_Phenolic_HighOC	CHON	1.39471	4.17424	1.28704	0.962112	0.629188	0.801954
559	C12H15O7N1S1	6	0.583333	1.25	316.05	0.0833333	12	15	1	7	1	0	0.0769231	0.333333	47	Highly_Unsaturated_and_Phenolic_HighOC	CHONS	0.261413	0	0.209487	0	0	0
560	C12H15O8N1S0	6	0.666667	1.25	300.072	0.0833333	12	15	1	8	0	0	0.142857	0.333333	78	Highly_Unsaturated_and_Phenolic_HighOC	CHON	1.12708	3.51706	1.16811	0.569321	0.431142	0.578678
561	C12H15O8N1S1	6	0.666667	1.25	332.045	0.0833333	12	15	1	8	1	0	0	0.5	46	Highly_Unsaturated_and_Phenolic_HighOC	CHONS	0.316779	0	0.297828	0	0	0
562	C12H15O9N1S0	6	0.75	1.25	316.067	0.0833333	12	15	1	9	0	0	0.0769231	0.5	78	Highly_Unsaturated_and_Phenolic_HighOC	CHON	0.476916	1.17118	0.588158	0.276439	0.249674	0.351254
563	C12H15O9N1S1	6	0.75	1.25	348.039	0.0833333	12	15	1	9	1	0	0	0.666667	33	Highly_Unsaturated_and_Phenolic_HighOC	CHONS	0.240508	0	0.195257	0	0	0
564	C12H16O10N0S0	5	0.833333	1.33333	319.067	0	12	16	0	10	0	0	0	0.333333	78	Highly_Unsaturated_and_Phenolic_HighOC	CHO	0.482634	0.888962	0.718187	0.236459	0.204299	0.331187
565	C12H16O10N0S1	5	0.833333	1.33333	351.039	0	12	16	0	10	1	0	0	0.5	57	Highly_Unsaturated_and_Phenolic_HighOC	CHOS	0.220812	0.445693	0.264916	0	0.112459	0.227339
566	C12H16O10N2S0	6	0.833333	1.33333	347.073	0.166667	12	16	2	10	0	0	0	0.833333	35	Highly_Unsaturated_and_Phenolic_HighOC	CHON	0	0	0.0739191	0	0	0
567	C12H16O11N0S0	5	0.916667	1.33333	335.062	0	12	16	0	11	0	0	0	0.5	73	Sugars_wo_X	CHO	0.154494	0.32394	0.208145	0	0	0.112019
568	C12H16O11N0S1	5	0.916667	1.33333	367.034	0	12	16	0	11	1	0	0	0.666667	9	Sugars_w_X	CHOS	0.0716576	0	0.0780305	0	0	0
569	C12H16O12N0S0	5	1	1.33333	351.057	0	12	16	0	12	0	0	0	0.666667	17	Sugars_wo_X	CHO	0	0	0.0768589	0	0	0
570	C12H16O2N0S0	5	0.166667	1.33333	191.108	0	12	16	0	2	0	0.3	0.363636	-1	70	Highly_Unsaturated_and_Phenolic_LowOC	CHO	0.46787	0.888021	0.512343	1.19081	0.558416	0.879977
571	C12H16O3N0S0	5	0.25	1.33333	207.103	0	12	16	0	3	0	0.222222	0.333333	-0.833333	73	Highly_Unsaturated_and_Phenolic_LowOC	CHO	0.76639	1.48116	0.917151	1.77165	0.837079	1.20659
572	C12H16O3N2S0	6	0.25	1.33333	235.109	0.166667	12	16	2	3	0	0.142857	0.294118	-0.333333	54	Highly_Unsaturated_and_Phenolic_LowOC	CHON	0.216501	0	0.193148	0	0.166588	0.226408
573	C12H16O4N0S0	5	0.333333	1.33333	223.098	0	12	16	0	4	0	0.125	0.3	-0.666667	77	Highly_Unsaturated_and_Phenolic_LowOC	CHO	1.10798	2.09864	1.26329	1.87231	0.974519	1.41323
574	C12H16O4N2S0	6	0.333333	1.33333	251.104	0.166667	12	16	2	4	0	0	0.25	-0.166667	76	Highly_Unsaturated_and_Phenolic_LowOC	CHON	0.305842	0.711379	0.258802	0.312914	0.219275	0.2908
575	C12H16O5N0S0	5	0.416667	1.33333	239.092	0	12	16	0	5	0	0	0.263158	-0.5	78	Highly_Unsaturated_and_Phenolic_LowOC	CHO	1.5278	4.13487	1.7463	1.95335	1.04651	1.4338
576	C12H16O5N2S0	6	0.416667	1.33333	267.099	0.166667	12	16	2	5	0	0	0.2	0	78	Highly_Unsaturated_and_Phenolic_LowOC	CHON	0.402732	1.21869	0.382824	0.444039	0.23829	0.335548
577	C12H16O6N0S0	5	0.5	1.33333	255.087	0	12	16	0	6	0	0	0.222222	-0.333333	78	Highly_Unsaturated_and_Phenolic_HighOC	CHO	2.28059	7.89062	2.43168	1.82398	1.00508	1.37102
578	C12H16O6N0S1	5	0.5	1.33333	287.059	0	12	16	0	6	1	0	0.125	-0.166667	67	Highly_Unsaturated_and_Phenolic_HighOC	CHOS	0.268402	0.901625	0.210382	0	0	0.176834
579	C12H16O6N2S0	6	0.5	1.33333	283.094	0.166667	12	16	2	6	0	0	0.142857	0.166667	78	Highly_Unsaturated_and_Phenolic_HighOC	CHON	0.655129	2.50113	0.573161	0.589019	0.325417	0.443164
580	C12H16O7N0S0	5	0.583333	1.33333	271.082	0	12	16	0	7	0	0	0.176471	-0.166667	78	Highly_Unsaturated_and_Phenolic_HighOC	CHO	2.78575	13.9683	2.96079	1.71088	0.994304	1.32966
581	C12H16O7N0S1	5	0.583333	1.33333	303.054	0	12	16	0	7	1	0	0.0666667	0	75	Highly_Unsaturated_and_Phenolic_HighOC	CHOS	0.536411	1.60078	0.416248	0.349388	0.205871	0.341306
582	C12H16O7N2S0	6	0.583333	1.33333	299.088	0.166667	12	16	2	7	0	0	0.0769231	0.333333	78	Highly_Unsaturated_and_Phenolic_HighOC	CHON	0.585711	2.07223	0.523548	0.397632	0.27164	0.411158
583	C12H16O8N0S0	5	0.666667	1.33333	287.077	0	12	16	0	8	0	0	0.125	0	78	Highly_Unsaturated_and_Phenolic_HighOC	CHO	2.77533	11.6986	3.30702	1.41174	1.07008	1.36387
584	C12H16O8N0S1	5	0.666667	1.33333	319.049	0	12	16	0	8	1	0	0	0.166667	75	Highly_Unsaturated_and_Phenolic_HighOC	CHOS	0.69325	2.03286	0.573843	0.313414	0.26465	0.39397
585	C12H16O8N2S0	6	0.666667	1.33333	315.083	0.166667	12	16	2	8	0	0	0	0.5	78	Highly_Unsaturated_and_Phenolic_HighOC	CHON	0.410341	1.81856	0.39567	0.286038	0.187496	0.266415
586	C12H16O9N0S0	5	0.75	1.33333	303.072	0	12	16	0	9	0	0	0.0666667	0.166667	78	Highly_Unsaturated_and_Phenolic_HighOC	CHO	1.36783	3.28343	1.87401	0.647028	0.538021	0.778712
587	C12H16O9N0S1	5	0.75	1.33333	335.044	0	12	16	0	9	1	0	0	0.333333	72	Highly_Unsaturated_and_Phenolic_HighOC	CHOS	0.56007	1.32514	0.506548	0.226443	0.26404	0.354726
588	C12H16O9N2S0	6	0.75	1.33333	331.078	0.166667	12	16	2	9	0	0	0	0.666667	73	Highly_Unsaturated_and_Phenolic_HighOC	CHON	0.192539	0.480536	0.16799	0	0	0.110622
589	C12H17O10N1S0	5	0.833333	1.41667	334.078	0.0833333	12	17	1	10	0	0	0	0.5	70	Highly_Unsaturated_and_Phenolic_HighOC	CHON	0.124391	0.456367	0.120443	0.322846	0	0.0825958
590	C12H17O11N1S0	5	0.916667	1.41667	350.073	0.0833333	12	17	1	11	0	0	0	0.666667	34	Sugars_w_X	CHON	0	0.227261	0	0	0	0
591	C12H17O2N1S0	5	0.166667	1.41667	206.119	0.0833333	12	17	1	2	0	0.222222	0.3	-0.833333	2	Highly_Unsaturated_and_Phenolic_LowOC	CHON	0	0	0	0	0	0.122645
592	C12H17O3N1S0	5	0.25	1.41667	222.114	0.0833333	12	17	1	3	0	0.125	0.263158	-0.666667	43	Highly_Unsaturated_and_Phenolic_LowOC	CHON	0.12421	0.294849	0.110091	0.209666	0.0990231	0.158545
593	C12H17O4N1S0	5	0.333333	1.41667	238.108	0.0833333	12	17	1	4	0	0	0.222222	-0.5	75	Highly_Unsaturated_and_Phenolic_LowOC	CHON	0.207364	0.609309	0.220351	0.923717	0.149016	0.248422
594	C12H17O5N1S0	5	0.416667	1.41667	254.103	0.0833333	12	17	1	5	0	0	0.176471	-0.333333	77	Highly_Unsaturated_and_Phenolic_LowOC	CHON	0.278144	1.11485	0.300044	0.304317	0.160816	0.236018
595	C12H17O6N1S0	5	0.5	1.41667	270.098	0.0833333	12	17	1	6	0	0	0.125	-0.166667	78	Highly_Unsaturated_and_Phenolic_HighOC	CHON	0.413351	2.29272	0.374516	0.347719	0.160367	0.249608
596	C12H17O6N1S1	5	0.5	1.41667	302.07	0.0833333	12	17	1	6	1	0	0	0	22	Highly_Unsaturated_and_Phenolic_HighOC	CHONS	0.111457	0	0.0833561	0	0	0
597	C12H17O7N1S0	5	0.583333	1.41667	286.093	0.0833333	12	17	1	7	0	0	0.0666667	0	78	Highly_Unsaturated_and_Phenolic_HighOC	CHON	0.523689	3.38145	0.498517	0.372091	0.2583	0.331314
598	C12H17O7N1S1	5	0.583333	1.41667	318.065	0.0833333	12	17	1	7	1	0	0	0.166667	31	Highly_Unsaturated_and_Phenolic_HighOC	CHONS	0.191253	0	0.145175	0	0	0
599	C12H17O8N1S0	5	0.666667	1.41667	302.088	0.0833333	12	17	1	8	0	0	0	0.166667	78	Highly_Unsaturated_and_Phenolic_HighOC	CHON	0.421807	1.82854	0.422511	0.199233	0.17313	0.219465
600	C12H17O8N1S1	5	0.666667	1.41667	334.06	0.0833333	12	17	1	8	1	0	0	0.333333	33	Highly_Unsaturated_and_Phenolic_HighOC	CHONS	0.243049	0	0.193894	0	0	0
601	C12H17O9N1S0	5	0.75	1.41667	318.083	0.0833333	12	17	1	9	0	0	0	0.333333	76	Highly_Unsaturated_and_Phenolic_HighOC	CHON	0.252715	1.27076	0.278677	0.132127	0.0894672	0.104737
602	C12H17O9N1S1	5	0.75	1.41667	350.055	0.0833333	12	17	1	9	1	0	0	0.5	28	Highly_Unsaturated_and_Phenolic_HighOC	CHONS	0.132424	0	0.128581	0	0	0
603	C12H18O10N0S0	4	0.833333	1.5	321.083	0	12	18	0	10	0	0	0	0.166667	73	Aliphatic_HighOC	CHO	0.198272	0.720497	0.206739	0	0	0.0828498
604	C12H18O10N0S1	4	0.833333	1.5	353.055	0	12	18	0	10	1	0	0	0.333333	46	Aliphatic_HighOC	CHOS	0.144525	0.353066	0.14771	0	0	0
605	C12H18O11N0S0	4	0.916667	1.5	337.078	0	12	18	0	11	0	0	0	0.333333	56	Sugars_wo_X	CHO	0	0.408172	0.0952215	0	0	0
606	C12H18O12N0S0	4	1	1.5	353.073	0	12	18	0	12	0	0	0	0.5	17	Sugars_wo_X	CHO	0.0667413	0	0	0	0	0
607	C12H18O2N0S0	4	0.166667	1.5	193.123	0	12	18	0	2	0	0.2	0.272727	-1.16667	56	Aliphatic_LowOC	CHO	0.191435	0.463856	0.225997	0.477342	0.217832	0.280851
608	C12H18O3N0S0	4	0.25	1.5	209.118	0	12	18	0	3	0	0.111111	0.238095	-1	70	Aliphatic_LowOC	CHO	0.302499	0.72777	0.32878	0.649949	0.273981	0.379534
609	C12H18O3N2S0	5	0.25	1.5	237.124	0.166667	12	18	2	3	0	0	0.176471	-0.5	38	Peptide_like	CHON	0.0738511	0	0.0806294	0	0	0
610	C12H18O4N0S0	4	0.333333	1.5	225.113	0	12	18	0	4	0	0	0.2	-0.833333	77	Aliphatic_LowOC	CHO	0.410038	1.21113	0.460109	0.666726	0.333049	0.419075
611	C12H18O4N2S0	5	0.333333	1.5	253.119	0.166667	12	18	2	4	0	0	0.125	-0.333333	70	Peptide_like	CHON	0.114301	0.533833	0.0872757	0	0	0.111934
612	C12H18O5N0S0	4	0.416667	1.5	241.108	0	12	18	0	5	0	0	0.157895	-0.666667	78	Aliphatic_LowOC	CHO	0.63861	2.87768	0.673708	0.676491	0.342316	0.433384
613	C12H18O5N0S1	4	0.416667	1.5	273.08	0	12	18	0	5	1	0	0.0588235	-0.5	44	Aliphatic_LowOC	CHOS	0.10108	0.373582	0.0862958	0	0	0
614	C12H18O5N2S0	5	0.416667	1.5	269.114	0.166667	12	18	2	5	0	0	0.0666667	-0.166667	74	Peptide_like	CHON	0.201918	0.972072	0.163495	0	0	0
615	C12H18O6N0S0	4	0.5	1.5	257.103	0	12	18	0	6	0	0	0.111111	-0.5	78	Aliphatic_HighOC	CHO	0.979381	5.31922	0.951277	0.755867	0.337185	0.499469
616	C12H18O6N0S1	4	0.5	1.5	289.075	0	12	18	0	6	1	0	0	-0.333333	61	Aliphatic_HighOC	CHOS	0.270989	1.06904	0.205589	0	0	0.202362
617	C12H18O6N2S0	5	0.5	1.5	285.109	0.166667	12	18	2	6	0	0	0	0	75	Peptide_like	CHON	0.266133	1.6117	0.221161	0.232119	0	0.16807
618	C12H18O7N0S0	4	0.583333	1.5	273.098	0	12	18	0	7	0	0	0.0588235	-0.333333	78	Aliphatic_HighOC	CHO	0.86384	6.12942	0.887307	0.581424	0.303034	0.447778
619	C12H18O7N0S1	4	0.583333	1.5	305.07	0	12	18	0	7	1	0	0	-0.166667	75	Aliphatic_HighOC	CHOS	0.603394	2.04129	0.430733	0.376097	0.19872	0.28119
620	C12H18O7N2S0	5	0.583333	1.5	301.104	0.166667	12	18	2	7	0	0	0	0.166667	75	Peptide_like	CHON	0.26226	1.37493	0.22687	0	0	0.164768
621	C12H18O8N0S0	4	0.666667	1.5	289.093	0	12	18	0	8	0	0	0	-0.166667	78	Aliphatic_HighOC	CHO	0.619807	4.36709	0.792277	0.42843	0.266477	0.383598
622	C12H18O8N0S1	4	0.666667	1.5	321.065	0	12	18	0	8	1	0	0	0	75	Aliphatic_HighOC	CHOS	0.693416	2.65422	0.558952	0.316837	0.249899	0.350535
623	C12H18O8N2S0	5	0.666667	1.5	317.099	0.166667	12	18	2	8	0	0	0	0.333333	74	Peptide_like	CHON	0.186655	1.08033	0.170397	0	0	0.0989371
624	C12H18O9N0S0	4	0.75	1.5	305.088	0	12	18	0	9	0	0	0	0	78	Aliphatic_HighOC	CHO	0.321771	1.0431	0.376753	0.188633	0.116628	0.202785
625	C12H18O9N0S1	4	0.75	1.5	337.06	0	12	18	0	9	1	0	0	0.166667	71	Aliphatic_HighOC	CHOS	0.42335	1.26338	0.324051	0.179535	0.194166	0.217518
626	C12H18O9N2S0	5	0.75	1.5	333.094	0.166667	12	18	2	9	0	0	0	0.5	61	Peptide_like	CHON	0.0715971	0.304148	0.0948593	0	0	0
627	C12H19O10N1S0	4	0.833333	1.58333	336.094	0.0833333	12	19	1	10	0	0	0	0.333333	48	Peptide_like	CHON	0	0.560644	0	0	0	0
628	C12H19O11N1S0	4	0.916667	1.58333	352.089	0.0833333	12	19	1	11	0	0	0	0.5	29	Sugars_w_X	CHON	0	0.183263	0	0	0	0
629	C12H19O4N1S0	4	0.333333	1.58333	240.124	0.0833333	12	19	1	4	0	0	0.111111	-0.666667	31	Peptide_like	CHON	0	0.202331	0	0	0	0
630	C12H19O5N1S0	4	0.416667	1.58333	256.119	0.0833333	12	19	1	5	0	0	0.0588235	-0.5	46	Peptide_like	CHON	0.076105	0.480175	0.0630336	0.581674	0	0
631	C12H19O6N1S0	4	0.5	1.58333	272.114	0.0833333	12	19	1	6	0	0	0	-0.333333	60	Peptide_like	CHON	0.100808	1.14499	0.0968192	0	0	0
632	C12H19O7N1S0	4	0.583333	1.58333	288.109	0.0833333	12	19	1	7	0	0	0	-0.166667	69	Peptide_like	CHON	0.11893	1.26283	0.125833	0	0	0
633	C12H19O7N1S1	4	0.583333	1.58333	320.081	0.0833333	12	19	1	7	1	0	0	0	28	Peptide_like	CHONS	0.0985689	0	0.0694669	0	0	0
634	C12H19O8N1S0	4	0.666667	1.58333	304.104	0.0833333	12	19	1	8	0	0	0	0	69	Peptide_like	CHON	0.154812	0.816959	0.132948	0	0	0
635	C12H19O8N1S1	4	0.666667	1.58333	336.076	0.0833333	12	19	1	8	1	0	0	0.166667	28	Peptide_like	CHONS	0.0994766	0	0.0837395	0	0	0
636	C12H19O9N1S0	4	0.75	1.58333	320.099	0.0833333	12	19	1	9	0	0	0	0.166667	60	Peptide_like	CHON	0	0.590494	0.0919835	0	0	0
637	C12H20O10N0S0	3	0.833333	1.66667	323.098	0	12	20	0	10	0	0	0	0	61	Aliphatic_HighOC	CHO	0	0.786421	0	0	0	0
638	C12H20O10N0S1	3	0.833333	1.66667	355.07	0	12	20	0	10	1	0	0	0.166667	28	Aliphatic_HighOC	CHOS	0	0.231711	0	0	0	0
639	C12H20O11N0S0	3	0.916667	1.66667	339.093	0	12	20	0	11	0	0	0	0.166667	52	Sugars_wo_X	CHO	0	0.476665	0	0	0	0
640	C12H20O12N0S0	3	1	1.66667	355.088	0	12	20	0	12	0	0	0	0.333333	35	Sugars_wo_X	CHO	0	0.199256	0	0	0	0
641	C12H20O3N0S0	3	0.25	1.66667	211.134	0	12	20	0	3	0	0	0.142857	-1.16667	36	Aliphatic_LowOC	CHO	0	0.171576	0	0	0	0
642	C12H20O4N0S0	3	0.333333	1.66667	227.129	0	12	20	0	4	0	0	0.1	-1	46	Aliphatic_LowOC	CHO	0.0884186	0.33664	0.0953706	0.135131	0	0
643	C12H20O4N2S0	4	0.333333	1.66667	255.135	0.166667	12	20	2	4	0	0	0	-0.5	46	Peptide_like	CHON	0	0.270498	0	0	0	0
644	C12H20O5N0S0	3	0.416667	1.66667	243.124	0	12	20	0	5	0	0	0.0526316	-0.833333	63	Aliphatic_LowOC	CHO	0.110187	0.836787	0.123745	0.144313	0	0
645	C12H20O5N0S1	3	0.416667	1.66667	275.096	0	12	20	0	5	1	0	0	-0.666667	40	Aliphatic_LowOC	CHOS	0	0.302628	0	0	0	0
646	C12H20O5N2S0	4	0.416667	1.66667	271.13	0.166667	12	20	2	5	0	0	0	-0.333333	57	Peptide_like	CHON	0.0707954	0.550043	0	0	0	0
647	C12H20O6N0S0	3	0.5	1.66667	259.119	0	12	20	0	6	0	0	0	-0.666667	73	Aliphatic_HighOC	CHO	0.125359	1.79522	0.107279	0.195894	0	0
648	C12H20O6N0S1	3	0.5	1.66667	291.091	0	12	20	0	6	1	0	0	-0.5	54	Aliphatic_HighOC	CHOS	0.18369	0.93039	0.124853	0	0	0.0817491
649	C12H20O6N2S0	4	0.5	1.66667	287.125	0.166667	12	20	2	6	0	0	0	-0.166667	59	Peptide_like	CHON	0.0760142	1.06242	0	0	0	0
650	C12H20O7N0S0	3	0.583333	1.66667	275.114	0	12	20	0	7	0	0	0	-0.5	68	Aliphatic_HighOC	CHO	0.122304	0.988137	0.125066	0.129789	0	0
651	C12H20O7N0S1	3	0.583333	1.66667	307.086	0	12	20	0	7	1	0	0	-0.333333	75	Aliphatic_HighOC	CHOS	0.348107	2.00182	0.27005	0.159503	0.118071	0.169298
652	C12H20O7N2S0	4	0.583333	1.66667	303.12	0.166667	12	20	2	7	0	0	0	0	70	Peptide_like	CHON	0.108356	0.717205	0.0870414	0	0	0
653	C12H20O8N0S0	3	0.666667	1.66667	291.109	0	12	20	0	8	0	0	0	-0.333333	66	Aliphatic_HighOC	CHO	0.0954678	0.637965	0.0927078	0.170938	0	0
654	C12H20O8N0S1	3	0.666667	1.66667	323.081	0	12	20	0	8	1	0	0	-0.166667	73	Aliphatic_HighOC	CHOS	0.333177	2.35058	0.239353	0.17027	0	0.107616
655	C12H20O8N2S0	4	0.666667	1.66667	319.115	0.166667	12	20	2	8	0	0	0	0.166667	45	Peptide_like	CHON	0	0.442075	0	0	0	0
656	C12H20O9N0S0	3	0.75	1.66667	307.103	0	12	20	0	9	0	0	0	-0.166667	53	Aliphatic_HighOC	CHO	0	0.441423	0	0.120024	0	0
657	C12H20O9N0S1	3	0.75	1.66667	339.076	0	12	20	0	9	1	0	0	0	47	Aliphatic_HighOC	CHOS	0.157066	0.983289	0.111475	0	0	0
658	C12H20O9N2S0	4	0.75	1.66667	335.11	0.166667	12	20	2	9	0	0	0	0.333333	29	Peptide_like	CHON	0	0.268906	0	0	0	0
659	C12H21O10N1S0	3	0.833333	1.75	338.109	0.0833333	12	21	1	10	0	0	0	0.166667	28	Peptide_like	CHON	0	0.197338	0	0	0	0
660	C12H21O4N1S0	3	0.333333	1.75	242.14	0.0833333	12	21	1	4	0	0	0	-0.833333	25	Peptide_like	CHON	0	0.150482	0	0	0	0
661	C12H21O5N1S0	3	0.416667	1.75	258.135	0.0833333	12	21	1	5	0	0	0	-0.666667	25	Peptide_like	CHON	0	0.172879	0	0	0	0
662	C12H21O6N1S0	3	0.5	1.75	274.13	0.0833333	12	21	1	6	0	0	0	-0.5	28	Peptide_like	CHON	0	0.184529	0	0	0	0
663	C12H21O7N1S0	3	0.583333	1.75	290.125	0.0833333	12	21	1	7	0	0	0	-0.333333	34	Peptide_like	CHON	0	0.334867	0	0	0	0
664	C12H21O8N1S0	3	0.666667	1.75	306.119	0.0833333	12	21	1	8	0	0	0	-0.166667	28	Peptide_like	CHON	0	0.470044	0	0	0	0
665	C12H21O9N1S0	3	0.75	1.75	322.114	0.0833333	12	21	1	9	0	0	0	0	32	Peptide_like	CHON	0	0.337472	0	0	0	0
666	C12H22O10N0S0	2	0.833333	1.83333	325.114	0	12	22	0	10	0	0	0	-0.166667	31	Aliphatic_HighOC	CHO	0	0.312144	0	0	0	0
667	C12H22O5N0S1	2	0.416667	1.83333	277.112	0	12	22	0	5	1	0	0	-0.833333	28	Aliphatic_LowOC	CHOS	0	0.254144	0	0	0	0
668	C12H22O6N0S0	2	0.5	1.83333	261.134	0	12	22	0	6	0	0	0	-0.833333	24	Aliphatic_HighOC	CHO	0	0.166728	0	0	0	0
669	C12H22O6N0S1	2	0.5	1.83333	293.106	0	12	22	0	6	1	0	0	-0.666667	49	Aliphatic_HighOC	CHOS	0.0719753	0.698607	0	0	0	0
670	C12H22O7N0S0	2	0.583333	1.83333	277.129	0	12	22	0	7	0	0	0	-0.666667	16	Aliphatic_HighOC	CHO	0	0.137058	0	0	0	0
671	C12H22O7N0S1	2	0.583333	1.83333	309.101	0	12	22	0	7	1	0	0	-0.5	63	Aliphatic_HighOC	CHOS	0.125722	1.13934	0.0800755	0	0	0
672	C12H22O7N2S0	3	0.583333	1.83333	305.135	0.166667	12	22	2	7	0	0	0	-0.166667	10	Peptide_like	CHON	0	0.161662	0	0	0	0
673	C12H22O8N0S0	2	0.666667	1.83333	293.124	0	12	22	0	8	0	0	0	-0.5	28	Aliphatic_HighOC	CHO	0	0.377019	0	0	0	0
674	C12H22O8N0S1	2	0.666667	1.83333	325.096	0	12	22	0	8	1	0	0	-0.333333	40	Aliphatic_HighOC	CHOS	0	0.934189	0	0	0	0
675	C12H22O9N0S0	2	0.75	1.83333	309.119	0	12	22	0	9	0	0	0	-0.333333	37	Aliphatic_HighOC	CHO	0	0.210146	0	0	0	0
676	C12H22O9N0S1	2	0.75	1.83333	341.091	0	12	22	0	9	1	0	0	-0.166667	31	Aliphatic_HighOC	CHOS	0	0.553263	0	0	0	0
677	C12H24O6N0S1	1	0.5	2	295.122	0	12	24	0	6	1	0	0	-0.833333	32	Aliphatic_HighOC	CHOS	0	0.233158	0	0	0	0
678	C12H24O7N0S1	1	0.583333	2	311.117	0	12	24	0	7	1	0	0	-0.666667	28	Aliphatic_HighOC	CHOS	0	0.192128	0	0	0	0
679	C12H28O12N2S0	0	1	2.33333	391.157	0.166667	12	28	2	12	0	0	0	0.166667	1	Sugars_w_X	CHON	0	0	0	0.173526	0	0
680	C12H5O2N1S0	11	0.166667	0.416667	194.025	0.0833333	12	5	1	2	0	0.888889	0.9	0.166667	17	Condensed_aromatics.X	CHON	0	0	0.0639709	0	0	0
681	C12H5O3N1S0	11	0.25	0.416667	210.02	0.0833333	12	5	1	3	0	0.875	0.894737	0.333333	45	Condensed_aromatics.X	CHON	0.124784	0	0.0918344	0	0	0
682	C12H5O4N1S0	11	0.333333	0.416667	226.015	0.0833333	12	5	1	4	0	0.857143	0.888889	0.5	59	Condensed_aromatics.X	CHON	0.163389	0	0.109537	0	0	0
683	C12H5O5N1S0	11	0.416667	0.416667	242.009	0.0833333	12	5	1	5	0	0.833333	0.882353	0.666667	62	Condensed_aromatics.X	CHON	0.28831	0	0.214067	0	0	0.129588
684	C12H5O6N1S0	11	0.5	0.416667	258.004	0.0833333	12	5	1	6	0	0.8	0.875	0.833333	75	Condensed_aromatics.X	CHON	0.365322	0.153775	0.284983	0	0.13311	0.171838
685	C12H5O6N1S1	11	0.5	0.416667	289.976	0.0833333	12	5	1	6	1	0.75	0.857143	1	39	Condensed_aromatics.X	CHONS	0.271352	0	0.107769	0	0	0
686	C12H5O7N1S0	11	0.583333	0.416667	273.999	0.0833333	12	5	1	7	0	0.75	0.866667	1	65	Condensed_aromatics.X	CHON	0.288143	0	0.231961	0	0.109124	0.139155
687	C12H5O7N1S1	11	0.583333	0.416667	305.971	0.0833333	12	5	1	7	1	0.666667	0.846154	1.16667	43	Condensed_aromatics.X	CHONS	0.107222	0	0	0	0	0
688	C12H5O8N1S0	11	0.666667	0.416667	289.994	0.0833333	12	5	1	8	0	0.666667	0.857143	1.16667	64	Condensed_aromatics.X	CHON	0.191178	0	0.129987	0	0	0
689	C12H6O10N0S0	10	0.833333	0.5	308.989	0	12	6	0	10	0	0	0.714286	1.16667	73	Condensed_aromatics	CHO	0.260718	0.14292	0.243038	0	0	0.109352
690	C12H6O2N2S0	11	0.166667	0.5	209.036	0.166667	12	6	2	2	0	0.875	0.888889	0.333333	14	Condensed_aromatics.X	CHON	0.124421	0	0	0	0	0
691	C12H6O3N0S0	10	0.25	0.5	197.024	0	12	6	0	3	0	0.777778	0.809524	0	69	Condensed_aromatics	CHO	0.547136	0.218324	0.408025	0.181121	0.203273	0.189365
692	C12H6O3N2S0	11	0.25	0.5	225.031	0.166667	12	6	2	3	0	0.857143	0.882353	0.5	54	Condensed_aromatics.X	CHON	0.186549	0	0.102464	0	0.0991514	0.0885227
693	C12H6O4N0S0	10	0.333333	0.5	213.019	0	12	6	0	4	0	0.75	0.8	0.166667	76	Condensed_aromatics	CHO	1.54202	0.405422	1.3615	0.555132	0.524874	0.595485
694	C12H6O4N2S0	11	0.333333	0.5	241.025	0.166667	12	6	2	4	0	0.833333	0.875	0.666667	70	Condensed_aromatics.X	CHON	0.330832	0.159708	0.192658	0	0.121598	0.185004
695	C12H6O5N0S0	10	0.416667	0.5	229.014	0	12	6	0	5	0	0.714286	0.789474	0.333333	77	Condensed_aromatics	CHO	1.80844	0.507311	1.56366	0.7451	0.649711	0.675964
696	C12H6O5N0S1	10	0.416667	0.5	260.986	0	12	6	0	5	1	0.666667	0.764706	0.5	48	Condensed_aromatics.X	CHOS	0.288809	0.138831	0.166137	0	0	0
697	C12H6O5N2S0	11	0.416667	0.5	257.02	0.166667	12	6	2	5	0	0.8	0.866667	0.833333	78	Condensed_aromatics.X	CHON	0.722718	0.214271	0.333382	0.202071	0.181468	0.214554
698	C12H6O6N0S0	10	0.5	0.5	245.009	0	12	6	0	6	0	0.666667	0.777778	0.5	78	Condensed_aromatics	CHO	1.83278	0.636229	1.57789	0.701614	0.585962	0.649293
699	C12H6O6N0S1	10	0.5	0.5	276.981	0	12	6	0	6	1	0.6	0.75	0.666667	59	Condensed_aromatics.X	CHOS	0.242686	0.152508	0.125471	0	0	0
700	C12H6O6N2S0	11	0.5	0.5	273.015	0.166667	12	6	2	6	0	0.75	0.857143	1	78	Condensed_aromatics.X	CHON	0.686261	0.215682	0.330485	0.148653	0.191088	0.22861
701	C12H6O7N0S0	10	0.583333	0.5	261.004	0	12	6	0	7	0	0.6	0.764706	0.666667	78	Condensed_aromatics	CHO	1.42985	0.821337	1.25908	0.600621	0.55351	0.517674
702	C12H6O7N0S1	10	0.583333	0.5	292.976	0	12	6	0	7	1	0.5	0.733333	0.833333	59	Condensed_aromatics.X	CHOS	0.177442	0	0.097586	0	0	0.0819607
703	C12H6O7N2S0	11	0.583333	0.5	289.01	0.166667	12	6	2	7	0	0.666667	0.846154	1.16667	68	Condensed_aromatics.X	CHON	0.346595	0.130039	0.179046	0	0.101556	0.147114
704	C12H6O8N0S0	10	0.666667	0.5	276.999	0	12	6	0	8	0	0.5	0.75	0.833333	78	Condensed_aromatics	CHO	1.06308	0.636518	0.912805	0.34605	0.36255	0.39596
705	C12H6O8N0S1	10	0.666667	0.5	308.971	0	12	6	0	8	1	0.333333	0.714286	1	60	Condensed_aromatics.X	CHOS	0.169667	0	0.104744	0	0	0
706	C12H6O8N2S0	11	0.666667	0.5	305.005	0.166667	12	6	2	8	0	0.5	0.833333	1.33333	59	Condensed_aromatics.X	CHON	0.224019	0	0.123426	0	0	0.080479
707	C12H6O9N0S0	10	0.75	0.5	292.994	0	12	6	0	9	0	0.333333	0.733333	1	78	Condensed_aromatics	CHO	0.533204	0.175412	0.53961	0.204491	0.251727	0.27539
708	C12H6O9N0S1	10	0.75	0.5	324.966	0	12	6	0	9	1	0	0.692308	1.16667	51	Condensed_aromatics.X	CHOS	0.125601	0	0.0689344	0	0	0
709	C12H6O9N2S0	11	0.75	0.5	321	0.166667	12	6	2	9	0	0	0.818182	1.5	44	Condensed_aromatics.X	CHON	0.0686624	0	0	0	0	0
710	C12H7O10N1S0	10	0.833333	0.583333	324	0.0833333	12	7	1	10	0	0	0.666667	1.33333	39	Condensed_aromatics.X	CHON	0	0	0	0	0	0.0928409
711	C12H7O2N1S0	10	0.166667	0.583333	196.04	0.0833333	12	7	1	2	0	0.777778	0.8	0	27	Condensed_aromatics.X	CHON	0.419417	0	0.275972	0	0.171912	0.177723
712	C12H7O3N1S0	10	0.25	0.583333	212.035	0.0833333	12	7	1	3	0	0.75	0.789474	0.166667	68	Condensed_aromatics.X	CHON	0.986839	0.324989	0.686191	0.273935	0.347928	0.43059
713	C12H7O4N1S0	10	0.333333	0.583333	228.03	0.0833333	12	7	1	4	0	0.714286	0.777778	0.333333	77	Condensed_aromatics.X	CHON	1.10333	0.398801	0.799094	0.402055	0.43871	0.44998
714	C12H7O5N1S0	10	0.416667	0.583333	244.025	0.0833333	12	7	1	5	0	0.666667	0.764706	0.5	78	Condensed_aromatics.X	CHON	1.18033	0.453906	0.88066	0.426093	0.395932	0.503068
715	C12H7O6N1S0	10	0.5	0.583333	260.02	0.0833333	12	7	1	6	0	0.6	0.75	0.666667	78	Condensed_aromatics.X	CHON	0.940958	0.500654	0.69369	0.405144	0.352225	0.447609
716	C12H7O6N1S1	10	0.5	0.583333	291.992	0.0833333	12	7	1	6	1	0.5	0.714286	0.833333	39	Condensed_aromatics.X	CHONS	0.237482	0	0.176	0	0	0
717	C12H7O7N1S0	10	0.583333	0.583333	276.015	0.0833333	12	7	1	7	0	0.5	0.733333	0.833333	78	Condensed_aromatics.X	CHON	0.786434	0.486905	0.650062	0.310744	0.321665	0.401845
718	C12H7O7N1S1	10	0.583333	0.583333	307.987	0.0833333	12	7	1	7	1	0.333333	0.692308	1	48	Condensed_aromatics.X	CHONS	0.238738	0	0.165157	0	0	0
719	C12H7O8N1S0	10	0.666667	0.583333	292.01	0.0833333	12	7	1	8	0	0.333333	0.714286	1	78	Condensed_aromatics.X	CHON	0.537954	0.203778	0.443195	0.205243	0.260545	0.303416
720	C12H7O8N1S1	10	0.666667	0.583333	323.982	0.0833333	12	7	1	8	1	0	0.666667	1.16667	48	Condensed_aromatics.X	CHONS	0.192887	0	0.145495	0	0	0
721	C12H7O9N1S0	10	0.75	0.583333	308.005	0.0833333	12	7	1	9	0	0	0.692308	1.16667	69	Condensed_aromatics.X	CHON	0.20092	0	0.187098	0	0.101589	0.0935606
722	C12H7O9N1S1	10	0.75	0.583333	339.977	0.0833333	12	7	1	9	1	0	0.636364	1.33333	22	Polyphenolic_HighOC	CHONS	0.0764076	0	0	0	0	0
723	C12H8O10N0S0	9	0.833333	0.666667	311.004	0	12	8	0	10	0	0	0.571429	1	77	Polyphenolic_HighOC	CHO	0.465706	0.33067	0.494363	0.16977	0.185797	0.292663
724	C12H8O10N0S1	9	0.833333	0.666667	342.977	0	12	8	0	10	1	0	0.5	1.16667	30	Highly_Unsaturated_and_Phenolic_HighOC	CHOS	0.100626	0	0.0808424	0	0	0
725	C12H8O11N0S0	9	0.916667	0.666667	326.999	0	12	8	0	11	0	0	0.538462	1.16667	56	Sugars_wo_X	CHO	0.0897195	0	0.12055	0	0	0
726	C12H8O2N0S0	9	0.166667	0.666667	183.045	0	12	8	0	2	0	0.7	0.727273	-0.333333	60	Condensed_aromatics	CHO	0.0903851	0.549934	0.0866792	0.339623	0.381951	0.399262
727	C12H8O2N2S0	10	0.166667	0.666667	211.051	0.166667	12	8	2	2	0	0.75	0.777778	0.166667	14	Condensed_aromatics.X	CHON	0.449974	0	0	0	0	0
728	C12H8O3N0S0	9	0.25	0.666667	199.04	0	12	8	0	3	0	0.666667	0.714286	-0.166667	71	Condensed_aromatics	CHO	1.91677	1.06133	1.73897	0.91946	0.84128	0.946062
729	C12H8O3N2S0	10	0.25	0.666667	227.046	0.166667	12	8	2	3	0	0.714286	0.764706	0.333333	56	Condensed_aromatics.X	CHON	0.694339	0	0.43412	0	0.28963	0.429066
730	C12H8O4N0S0	9	0.333333	0.666667	215.035	0	12	8	0	4	0	0.625	0.7	0	76	Condensed_aromatics	CHO	2.72552	1.22719	2.48884	1.38119	1.13229	1.35917
731	C12H8O4N2S0	10	0.333333	0.666667	243.041	0.166667	12	8	2	4	0	0.666667	0.75	0.5	76	Condensed_aromatics.X	CHON	0.951623	0.337327	0.632403	0.343128	0.372363	0.485711
732	C12H8O5N0S0	9	0.416667	0.666667	231.03	0	12	8	0	5	0	0.571429	0.684211	0.166667	77	Condensed_aromatics	CHO	3.02777	1.61112	2.94869	1.41074	1.15499	1.20562
733	C12H8O5N0S1	9	0.416667	0.666667	263.002	0	12	8	0	5	1	0.5	0.647059	0.333333	51	Polyphenolic_LowOC	CHOS	0.347427	0.288698	0.211426	0	0	0
734	C12H8O5N2S0	10	0.416667	0.666667	259.036	0.166667	12	8	2	5	0	0.6	0.733333	0.666667	78	Condensed_aromatics.X	CHON	0.793922	0.338413	0.538182	0.357067	0.317913	0.424663
735	C12H8O6N0S0	9	0.5	0.666667	247.025	0	12	8	0	6	0	0.5	0.666667	0.333333	78	Condensed_aromatics	CHO	3.39878	1.944	2.98344	1.39088	1.16654	1.36112
736	C12H8O6N0S1	9	0.5	0.666667	278.997	0	12	8	0	6	1	0.4	0.625	0.5	67	Polyphenolic_HighOC	CHOS	0.429083	0.306934	0.271371	0	0	0.105372
737	C12H8O6N2S0	10	0.5	0.666667	275.031	0.166667	12	8	2	6	0	0.5	0.714286	0.833333	78	Condensed_aromatics.X	CHON	0.884549	0.297635	0.573544	0.381189	0.298288	0.367638
738	C12H8O7N0S0	9	0.583333	0.666667	263.02	0	12	8	0	7	0	0.4	0.647059	0.5	78	Polyphenolic_HighOC	CHO	2.48655	1.76975	2.30304	1.0268	0.994272	1.05419
739	C12H8O7N0S1	9	0.583333	0.666667	294.992	0	12	8	0	7	1	0.25	0.6	0.666667	74	Polyphenolic_HighOC	CHOS	0.378543	0.380891	0.232941	0	0.114063	0.124635
740	C12H8O7N2S0	10	0.583333	0.666667	291.026	0.166667	12	8	2	7	0	0.333333	0.692308	1	78	Condensed_aromatics.X	CHON	0.838229	0.293438	0.571542	0.290211	0.287032	0.379492
741	C12H8O8N0S0	9	0.666667	0.666667	279.015	0	12	8	0	8	0	0.25	0.625	0.666667	78	Polyphenolic_HighOC	CHO	1.90942	1.99191	1.9033	0.754448	0.800747	0.966087
742	C12H8O8N0S1	9	0.666667	0.666667	310.987	0	12	8	0	8	1	0	0.571429	0.833333	72	Polyphenolic_HighOC	CHOS	0.33947	0.180079	0.255692	0	0.105597	0.0989795
743	C12H8O8N2S0	10	0.666667	0.666667	307.021	0.166667	12	8	2	8	0	0	0.666667	1.16667	77	Condensed_aromatics.X	CHON	0.426118	0.137746	0.325223	0	0.21812	0.192709
744	C12H8O9N0S0	9	0.75	0.666667	295.01	0	12	8	0	9	0	0	0.6	0.833333	78	Polyphenolic_HighOC	CHO	1.10317	0.978259	1.1375	0.353812	0.534751	0.781633
745	C12H8O9N0S1	9	0.75	0.666667	326.982	0	12	8	0	9	1	0	0.538462	1	57	Polyphenolic_HighOC	CHOS	0.225895	0	0.173785	0	0	0.0840775
746	C12H8O9N2S0	10	0.75	0.666667	323.016	0.166667	12	8	2	9	0	0	0.636364	1.33333	59	Polyphenolic_HighOC	CHON	0.147037	0	0.109302	0	0	0.0829768
747	C12H9O10N1S0	9	0.833333	0.75	326.015	0.0833333	12	9	1	10	0	0	0.5	1.16667	57	Highly_Unsaturated_and_Phenolic_HighOC	CHON	0.12306	0	0.121743	0	0	0.0839928
748	C12H9O2N1S0	9	0.166667	0.75	198.056	0.0833333	12	9	1	2	0	0.666667	0.7	-0.166667	28	Condensed_aromatics.X	CHON	0.53744	0	0.466798	0	0.280427	0.331484
749	C12H9O3N1S0	9	0.25	0.75	214.051	0.0833333	12	9	1	3	0	0.625	0.684211	0	68	Condensed_aromatics.X	CHON	1.0583	0.526307	0.905222	0.444957	0.517499	0.658819
750	C12H9O4N1S0	9	0.333333	0.75	230.046	0.0833333	12	9	1	4	0	0.571429	0.666667	0.166667	77	Condensed_aromatics.X	CHON	1.3876	0.744812	1.23718	0.622489	0.626495	0.721221
751	C12H9O5N1S0	9	0.416667	0.75	246.041	0.0833333	12	9	1	5	0	0.5	0.647059	0.333333	78	Polyphenolic_LowOC	CHON	1.65964	0.960494	1.39068	0.732831	0.619344	0.807584
752	C12H9O6N1S0	9	0.5	0.75	262.036	0.0833333	12	9	1	6	0	0.4	0.625	0.5	78	Polyphenolic_HighOC	CHON	1.39875	0.786204	1.11886	0.677743	0.562489	0.604122
753	C12H9O6N1S1	9	0.5	0.75	294.008	0.0833333	12	9	1	6	1	0.25	0.571429	0.666667	39	Polyphenolic_HighOC	CHONS	0.309457	0	0.241483	0	0	0
754	C12H9O7N1S0	9	0.583333	0.75	278.031	0.0833333	12	9	1	7	0	0.25	0.6	0.666667	78	Polyphenolic_HighOC	CHON	1.13203	1.04625	0.950511	0.512731	0.494603	0.592395
755	C12H9O7N1S1	9	0.583333	0.75	310.003	0.0833333	12	9	1	7	1	0	0.538462	0.833333	48	Polyphenolic_HighOC	CHONS	0.300124	0	0.252305	0	0	0
756	C12H9O8N1S0	9	0.666667	0.75	294.026	0.0833333	12	9	1	8	0	0	0.571429	0.833333	78	Polyphenolic_HighOC	CHON	0.81932	0.55225	0.748926	0.343295	0.398145	0.454933
757	C12H9O8N1S1	9	0.666667	0.75	325.998	0.0833333	12	9	1	8	1	0	0.5	1	48	Highly_Unsaturated_and_Phenolic_HighOC	CHONS	0.292031	0	0.196748	0	0	0
758	C12H9O9N1S0	9	0.75	0.75	310.02	0.0833333	12	9	1	9	0	0	0.538462	1	77	Polyphenolic_HighOC	CHON	0.383324	0	0.397672	0.142393	0.153217	0.23424
759	C12H9O9N1S1	9	0.75	0.75	341.993	0.0833333	12	9	1	9	1	0	0.454545	1.16667	36	Highly_Unsaturated_and_Phenolic_HighOC	CHONS	0.135525	0	0.0984807	0	0	0
760	C13H10O10N0S0	9	0.769231	0.769231	325.02	0	13	10	0	10	0	0	0.5	0.769231	78	Highly_Unsaturated_and_Phenolic_HighOC	CHO	1.92857	0.963352	2.35355	0.645525	0.888386	1.02989
761	C13H10O10N0S1	9	0.769231	0.769231	356.992	0	13	10	0	10	1	0	0.428571	0.923077	55	Highly_Unsaturated_and_Phenolic_HighOC	CHOS	0.317187	0.178704	0.259484	0	0.0939565	0.111638
762	C13H10O10N2S0	10	0.769231	0.769231	353.026	0.153846	13	10	2	10	0	0	0.5	1.23077	53	Highly_Unsaturated_and_Phenolic_HighOC	CHON	0.120791	0	0.145261	0	0	0.104779
763	C13H10O11N0S0	9	0.846154	0.769231	341.015	0	13	10	0	11	0	0	0.466667	0.923077	78	Highly_Unsaturated_and_Phenolic_HighOC	CHO	0.587072	0.196723	0.898299	0.304317	0.318554	0.346513
764	C13H10O11N0S1	9	0.846154	0.769231	372.987	0	13	10	0	11	1	0	0.384615	1.07692	24	Highly_Unsaturated_and_Phenolic_HighOC	CHOS	0.116888	0	0.0859976	0	0	0.0902584
765	C13H10O12N0S0	9	0.923077	0.769231	357.01	0	13	10	0	12	0	0	0.428571	1.07692	48	Sugars_wo_X	CHO	0.186171	0	0.312079	0	0.107264	0.104822
766	C13H10O13N0S0	9	1	0.769231	373.005	0	13	10	0	13	0	0	0.384615	1.23077	8	Sugars_wo_X	CHO	0.111896	0	0.16324	0.11535	0	0
767	C13H10O2N0S0	9	0.153846	0.769231	197.061	0	13	10	0	2	0	0.636364	0.666667	-0.461538	71	Condensed_aromatics	CHO	1.47935	1.00619	1.38114	0.728741	0.794943	0.909019
768	C13H10O2N2S0	10	0.153846	0.769231	225.067	0.153846	13	10	2	2	0	0.666667	0.7	0	14	Condensed_aromatics.X	CHON	0.467007	0	0	0	0	0
769	C13H10O3N0S0	9	0.230769	0.769231	213.056	0	13	10	0	3	0	0.6	0.652174	-0.307692	76	Polyphenolic_LowOC	CHO	2.95902	1.52005	2.82328	1.48244	1.46803	1.74184
770	C13H10O3N2S0	10	0.230769	0.769231	241.062	0.153846	13	10	2	3	0	0.625	0.684211	0.153846	57	Condensed_aromatics.X	CHON	0.837155	0	0.674027	0	0.508616	0.692898
771	C13H10O4N0S0	9	0.307692	0.769231	229.051	0	13	10	0	4	0	0.555556	0.636364	-0.153846	77	Polyphenolic_LowOC	CHO	3.77123	2.29215	3.77948	2.16377	1.81631	2.18153
772	C13H10O4N2S0	10	0.307692	0.769231	257.057	0.153846	13	10	2	4	0	0.571429	0.666667	0.307692	76	Condensed_aromatics.X	CHON	1.17629	0.51538	0.89178	0.643188	0.574834	0.742007
773	C13H10O5N0S0	9	0.384615	0.769231	245.046	0	13	10	0	5	0	0.5	0.619048	0	78	Polyphenolic_LowOC	CHO	4.72335	3.22778	4.7392	2.60405	2.04492	2.40692
774	C13H10O5N0S1	9	0.384615	0.769231	277.018	0	13	10	0	5	1	0.428571	0.578947	0.153846	51	Polyphenolic_LowOC	CHOS	0.465979	0.324519	0.338239	0	0	0
775	C13H10O5N2S0	10	0.384615	0.769231	273.052	0.153846	13	10	2	5	0	0.5	0.647059	0.461538	78	Polyphenolic_LowOC	CHON	1.18172	0.444571	0.861616	0.67816	0.606356	0.686379
776	C13H10O6N0S0	9	0.461538	0.769231	261.04	0	13	10	0	6	0	0.428571	0.6	0.153846	78	Polyphenolic_LowOC	CHO	4.65776	3.85185	4.56094	2.59345	2.01176	2.15807
777	C13H10O6N0S1	9	0.461538	0.769231	293.013	0	13	10	0	6	1	0.333333	0.555556	0.307692	67	Polyphenolic_LowOC	CHOS	0.524052	0.380275	0.399909	0	0	0.195165
778	C13H10O6N2S0	10	0.461538	0.769231	289.047	0.153846	13	10	2	6	0	0.4	0.625	0.615385	78	Polyphenolic_LowOC	CHON	1.3952	0.507637	1.03065	0.819886	0.708137	0.78612
779	C13H10O7N0S0	9	0.538462	0.769231	277.035	0	13	10	0	7	0	0.333333	0.578947	0.307692	78	Polyphenolic_HighOC	CHO	4.56025	3.72276	4.56413	2.07346	1.81593	1.99072
780	C13H10O7N0S1	9	0.538462	0.769231	309.007	0	13	10	0	7	1	0.2	0.529412	0.461538	75	Polyphenolic_HighOC	CHOS	0.693084	0.603846	0.441981	0.139722	0.220237	0.199144
781	C13H10O7N2S0	10	0.538462	0.769231	305.042	0.153846	13	10	2	7	0	0.25	0.6	0.769231	78	Polyphenolic_HighOC	CHON	1.39058	0.501088	0.995267	0.674154	0.629573	0.709621
782	C13H10O8N0S0	9	0.615385	0.769231	293.03	0	13	10	0	8	0	0.2	0.555556	0.461538	78	Polyphenolic_HighOC	CHO	4.34482	5.80204	4.53823	1.73759	1.85575	1.90957
783	C13H10O8N0S1	9	0.615385	0.769231	325.002	0	13	10	0	8	1	0	0.5	0.615385	75	Highly_Unsaturated_and_Phenolic_HighOC	CHOS	0.746936	0.569436	0.49381	0.196729	0.258268	0.236865
784	C13H10O8N2S0	10	0.615385	0.769231	321.036	0.153846	13	10	2	8	0	0	0.571429	0.923077	78	Polyphenolic_HighOC	CHON	0.975751	0.362184	0.810874	0.476924	0.485784	0.516912
785	C13H10O9N0S0	9	0.692308	0.769231	309.025	0	13	10	0	9	0	0	0.529412	0.615385	78	Polyphenolic_HighOC	CHO	3.83308	3.34899	4.12886	1.09866	1.39024	1.54337
786	C13H10O9N0S1	9	0.692308	0.769231	340.997	0	13	10	0	9	1	0	0.466667	0.769231	71	Highly_Unsaturated_and_Phenolic_HighOC	CHOS	0.522736	0.328752	0.424194	0	0.159758	0.176199
787	C13H10O9N2S0	10	0.692308	0.769231	337.031	0.153846	13	10	2	9	0	0	0.538462	1.07692	78	Polyphenolic_HighOC	CHON	0.440535	0.176425	0.413244	0.245473	0.250155	0.315269
788	C13H11O10N1S0	9	0.769231	0.846154	340.031	0.0769231	13	11	1	10	0	0	0.428571	0.923077	78	Highly_Unsaturated_and_Phenolic_HighOC	CHON	0.524476	0.227514	0.662545	0.313665	0.323653	0.406629
789	C13H11O10N1S1	9	0.769231	0.846154	372.003	0.0769231	13	11	1	10	1	0	0.333333	1.07692	28	Highly_Unsaturated_and_Phenolic_HighOC	CHONS	0.130623	0	0.122531	0	0	0
790	C13H11O11N1S0	9	0.846154	0.846154	356.026	0.0769231	13	11	1	11	0	0	0.384615	1.07692	46	Highly_Unsaturated_and_Phenolic_HighOC	CHON	0.164206	0	0.2038	0	0.102294	0.162016
791	C13H11O12N1S0	9	0.923077	0.846154	372.021	0.0769231	13	11	1	12	0	0	0.333333	1.23077	3	Sugars_w_X	CHON	0	0	0.0650787	0	0	0
792	C13H11O2N1S0	9	0.153846	0.846154	212.072	0.0769231	13	11	1	2	0	0.6	0.636364	-0.307692	31	Polyphenolic_LowOC	CHON	0.615088	0	0.581341	0	0.349724	0.47809
793	C13H11O3N1S0	9	0.230769	0.846154	228.067	0.0769231	13	11	1	3	0	0.555556	0.619048	-0.153846	69	Polyphenolic_LowOC	CHON	1.08211	0.677259	0.984573	0.663053	0.633421	0.810929
794	C13H11O4N1S0	9	0.307692	0.846154	244.062	0.0769231	13	11	1	4	0	0.5	0.6	0	78	Polyphenolic_LowOC	CHON	1.70836	1.1562	1.5065	1.01853	0.923853	1.1433
795	C13H11O5N1S0	9	0.384615	0.846154	260.056	0.0769231	13	11	1	5	0	0.428571	0.578947	0.153846	78	Polyphenolic_LowOC	CHON	1.89334	1.64702	1.69735	1.16894	1.01973	1.18619
796	C13H11O6N1S0	9	0.461538	0.846154	276.051	0.0769231	13	11	1	6	0	0.333333	0.555556	0.307692	78	Polyphenolic_LowOC	CHON	1.99926	1.30712	1.78177	1.22661	0.945754	1.10329
797	C13H11O6N1S1	9	0.461538	0.846154	308.023	0.0769231	13	11	1	6	1	0.2	0.5	0.461538	39	Highly_Unsaturated_and_Phenolic_LowOC	CHONS	0.339379	0	0.282086	0	0	0
798	C13H11O7N1S0	9	0.538462	0.846154	292.046	0.0769231	13	11	1	7	0	0.2	0.529412	0.461538	78	Polyphenolic_HighOC	CHON	2.13468	2.42501	2.03414	1.11377	1.03067	1.17687
799	C13H11O7N1S1	9	0.538462	0.846154	324.018	0.0769231	13	11	1	7	1	0	0.466667	0.615385	48	Highly_Unsaturated_and_Phenolic_HighOC	CHONS	0.470668	0	0.359988	0	0	0
800	C13H11O8N1S0	9	0.615385	0.846154	308.041	0.0769231	13	11	1	8	0	0	0.5	0.615385	78	Highly_Unsaturated_and_Phenolic_HighOC	CHON	2.10763	1.47823	1.93434	0.971126	0.956176	1.01786
801	C13H11O8N1S1	9	0.615385	0.846154	340.013	0.0769231	13	11	1	8	1	0	0.428571	0.769231	48	Highly_Unsaturated_and_Phenolic_HighOC	CHONS	0.40196	0	0.30179	0	0	0
802	C13H11O9N1S0	9	0.692308	0.846154	324.036	0.0769231	13	11	1	9	0	0	0.466667	0.769231	78	Highly_Unsaturated_and_Phenolic_HighOC	CHON	1.31383	0.788954	1.40728	0.599118	0.701916	0.788999
803	C13H11O9N1S1	9	0.692308	0.846154	356.008	0.0769231	13	11	1	9	1	0	0.384615	0.923077	43	Highly_Unsaturated_and_Phenolic_HighOC	CHONS	0.259144	0	0.228063	0	0	0
804	C13H12O10N0S0	8	0.769231	0.923077	327.036	0	13	12	0	10	0	0	0.375	0.615385	78	Highly_Unsaturated_and_Phenolic_HighOC	CHO	4.07441	2.87522	5.85851	1.78634	1.86201	2.06206
805	C13H12O10N0S1	8	0.769231	0.923077	359.008	0	13	12	0	10	1	0	0.285714	0.769231	61	Highly_Unsaturated_and_Phenolic_HighOC	CHOS	0.461531	0.343189	0.417952	0	0.175567	0.174336
806	C13H12O10N2S0	9	0.769231	0.923077	355.042	0.153846	13	12	2	10	0	0	0.333333	1.07692	68	Highly_Unsaturated_and_Phenolic_HighOC	CHON	0.241718	0	0.299617	0.151324	0.171719	0.198298
807	C13H12O11N0S0	8	0.846154	0.923077	343.031	0	13	12	0	11	0	0	0.333333	0.769231	78	Highly_Unsaturated_and_Phenolic_HighOC	CHO	1.62371	0.911576	2.5402	0.751527	0.80498	0.938781
808	C13H12O11N0S1	8	0.846154	0.923077	375.003	0	13	12	0	11	1	0	0.230769	0.923077	36	Highly_Unsaturated_and_Phenolic_HighOC	CHOS	0.160076	0	0.148136	0	0	0.110664
809	C13H12O11N2S0	9	0.846154	0.923077	371.037	0.153846	13	12	2	11	0	0	0.272727	1.23077	5	Highly_Unsaturated_and_Phenolic_HighOC	CHON	0.069449	0	0.0704682	0	0	0
810	C13H12O12N0S0	8	0.923077	0.923077	359.026	0	13	12	0	12	0	0	0.285714	0.923077	77	Sugars_wo_X	CHO	0.447115	0.25693	0.755019	0.234205	0.248905	0.288598
811	C13H12O13N0S0	8	1	0.923077	375.021	0	13	12	0	13	0	0	0.230769	1.07692	19	Sugars_wo_X	CHO	0.0960124	0	0.173848	0	0	0
812	C13H12O2N0S0	8	0.153846	0.923077	199.076	0	13	12	0	2	0	0.545455	0.583333	-0.615385	72	Polyphenolic_LowOC	CHO	1.37136	1.32185	1.48179	1.10475	1.16455	1.47292
813	C13H12O2N2S0	9	0.153846	0.923077	227.083	0.153846	13	12	2	2	0	0.555556	0.6	-0.153846	14	Polyphenolic_LowOC	CHON	0.363038	0	0	0	0	0
814	C13H12O3N0S0	8	0.230769	0.923077	215.071	0	13	12	0	3	0	0.5	0.565217	-0.461538	76	Polyphenolic_LowOC	CHO	2.55803	2.02816	2.68448	2.29131	1.94743	2.5534
815	C13H12O3N2S0	9	0.230769	0.923077	243.078	0.153846	13	12	2	3	0	0.5	0.578947	0	57	Polyphenolic_LowOC	CHON	0.75981	0	0.68421	0	0.573135	0.722914
816	C13H12O4N0S0	8	0.307692	0.923077	231.066	0	13	12	0	4	0	0.444444	0.545455	-0.307692	77	Polyphenolic_LowOC	CHO	3.48536	2.84823	3.89773	2.85295	2.24149	2.85487
817	C13H12O4N2S0	9	0.307692	0.923077	259.072	0.153846	13	12	2	4	0	0.428571	0.555556	0.153846	76	Polyphenolic_LowOC	CHON	1.06542	0.714201	0.919473	0.928391	0.693354	0.935902
818	C13H12O5N0S0	8	0.384615	0.923077	247.061	0	13	12	0	5	0	0.375	0.52381	-0.153846	78	Polyphenolic_LowOC	CHO	4.26845	4.3368	4.73123	3.36526	2.48026	3.01231
819	C13H12O5N0S1	8	0.384615	0.923077	279.033	0	13	12	0	5	1	0.285714	0.473684	0	51	Highly_Unsaturated_and_Phenolic_LowOC	CHOS	0.392884	0.475145	0.324179	0	0	0
820	C13H12O5N2S0	9	0.384615	0.923077	275.067	0.153846	13	12	2	5	0	0.333333	0.529412	0.307692	78	Polyphenolic_LowOC	CHON	1.22369	0.73175	1.0161	1.04875	0.747676	0.989752
821	C13H12O6N0S0	8	0.461538	0.923077	263.056	0	13	12	0	6	0	0.285714	0.5	0	78	Highly_Unsaturated_and_Phenolic_LowOC	CHO	4.46396	6.38074	4.84899	3.05569	2.26987	2.6498
822	C13H12O6N0S1	8	0.461538	0.923077	295.028	0	13	12	0	6	1	0.166667	0.444444	0.153846	67	Highly_Unsaturated_and_Phenolic_LowOC	CHOS	0.501528	0.643863	0.365122	0	0	0.247872
823	C13H12O6N2S0	9	0.461538	0.923077	291.062	0.153846	13	12	2	6	0	0.2	0.5	0.461538	78	Highly_Unsaturated_and_Phenolic_LowOC	CHON	1.49064	0.88187	1.25665	1.25132	0.920742	1.1364
824	C13H12O7N0S0	8	0.538462	0.923077	279.051	0	13	12	0	7	0	0.166667	0.473684	0.153846	78	Highly_Unsaturated_and_Phenolic_HighOC	CHO	5.18425	6.304	5.58241	2.91914	2.4412	2.67414
825	C13H12O7N0S1	8	0.538462	0.923077	311.023	0	13	12	0	7	1	0	0.411765	0.307692	75	Highly_Unsaturated_and_Phenolic_HighOC	CHOS	0.755045	1.01274	0.535434	0.208832	0.298288	0.278311
826	C13H12O7N2S0	9	0.538462	0.923077	307.057	0.153846	13	12	2	7	0	0	0.466667	0.615385	78	Highly_Unsaturated_and_Phenolic_HighOC	CHON	1.61253	0.978332	1.324	1.18538	0.946652	1.14766
827	C13H12O8N0S0	8	0.615385	0.923077	295.046	0	13	12	0	8	0	0	0.444444	0.307692	78	Highly_Unsaturated_and_Phenolic_HighOC	CHO	5.70653	6.10811	6.10325	2.78492	2.61295	2.83179
828	C13H12O8N0S1	8	0.615385	0.923077	327.018	0	13	12	0	8	1	0	0.375	0.461538	75	Highly_Unsaturated_and_Phenolic_HighOC	CHOS	0.874202	1.25097	0.630507	0.292381	0.293799	0.306464
829	C13H12O8N2S0	9	0.615385	0.923077	323.052	0.153846	13	12	2	8	0	0	0.428571	0.769231	78	Highly_Unsaturated_and_Phenolic_HighOC	CHON	1.35038	0.809614	1.24966	0.946503	0.850483	1.05452
830	C13H12O9N0S0	8	0.692308	0.923077	311.041	0	13	12	0	9	0	0	0.411765	0.461538	78	Highly_Unsaturated_and_Phenolic_HighOC	CHO	6.0727	4.37338	7.35195	2.18589	2.33259	2.55945
831	C13H12O9N0S1	8	0.692308	0.923077	343.013	0	13	12	0	9	1	0	0.333333	0.615385	72	Highly_Unsaturated_and_Phenolic_HighOC	CHOS	0.752927	0.921345	0.681164	0.191972	0.203915	0.267134
832	C13H12O9N2S0	9	0.692308	0.923077	339.047	0.153846	13	12	2	9	0	0	0.384615	0.923077	78	Highly_Unsaturated_and_Phenolic_HighOC	CHON	0.684446	0.440845	0.716675	0.535935	0.482353	0.603275
833	C13H13O10N1S0	8	0.769231	1	342.047	0.0769231	13	13	1	10	0	0	0.285714	0.769231	78	Highly_Unsaturated_and_Phenolic_HighOC	CHON	0.807627	0.691732	1.06791	0.559472	0.535328	0.682061
834	C13H13O10N1S1	8	0.769231	1	374.019	0.0769231	13	13	1	10	1	0	0.166667	0.923077	30	Highly_Unsaturated_and_Phenolic_HighOC	CHONS	0.120957	0	0.164092	0	0	0
835	C13H13O11N1S0	8	0.846154	1	358.042	0.0769231	13	13	1	11	0	0	0.230769	0.923077	65	Highly_Unsaturated_and_Phenolic_HighOC	CHON	0.205443	0	0.301982	0	0.177331	0.243088
836	C13H13O12N1S0	8	0.923077	1	374.036	0.0769231	13	13	1	12	0	0	0.166667	1.07692	1	Sugars_w_X	CHON	0	0	0.0635449	0	0	0
837	C13H13O2N1S0	8	0.153846	1	214.087	0.0769231	13	13	1	2	0	0.5	0.545455	-0.461538	30	Polyphenolic_LowOC	CHON	0.467854	0	0.429136	0	0.382913	0.553785
838	C13H13O3N1S0	8	0.230769	1	230.082	0.0769231	13	13	1	3	0	0.444444	0.52381	-0.307692	70	Polyphenolic_LowOC	CHON	0.865519	0.729651	0.875249	0.775899	0.609499	0.863467
839	C13H13O4N1S0	8	0.307692	1	246.077	0.0769231	13	13	1	4	0	0.375	0.5	-0.153846	78	Highly_Unsaturated_and_Phenolic_LowOC	CHON	1.29968	1.27112	1.2775	1.18196	0.840254	1.21116
840	C13H13O5N1S0	8	0.384615	1	262.072	0.0769231	13	13	1	5	0	0.285714	0.473684	0	78	Highly_Unsaturated_and_Phenolic_LowOC	CHON	1.50076	2.17296	1.45325	1.37777	0.995875	1.28508
841	C13H13O6N1S0	8	0.461538	1	278.067	0.0769231	13	13	1	6	0	0.166667	0.444444	0.153846	78	Highly_Unsaturated_and_Phenolic_LowOC	CHON	1.86239	2.34226	1.83164	1.59712	1.15143	1.3974
842	C13H13O6N1S1	8	0.461538	1	310.039	0.0769231	13	13	1	6	1	0	0.375	0.307692	39	Highly_Unsaturated_and_Phenolic_LowOC	CHONS	0.326022	0	0.231429	0	0	0
843	C13H13O7N1S0	8	0.538462	1	294.062	0.0769231	13	13	1	7	0	0	0.411765	0.307692	78	Highly_Unsaturated_and_Phenolic_HighOC	CHON	2.27648	2.78187	2.1765	1.78283	1.34563	1.63684
844	C13H13O7N1S1	8	0.538462	1	326.034	0.0769231	13	13	1	7	1	0	0.333333	0.461538	48	Highly_Unsaturated_and_Phenolic_HighOC	CHONS	0.40134	0	0.323923	0	0	0
845	C13H13O8N1S0	8	0.615385	1	310.057	0.0769231	13	13	1	8	0	0	0.375	0.461538	78	Highly_Unsaturated_and_Phenolic_HighOC	CHON	2.60837	2.85923	2.61827	1.6038	1.36308	1.63811
846	C13H13O8N1S1	8	0.615385	1	342.029	0.0769231	13	13	1	8	1	0	0.285714	0.615385	48	Highly_Unsaturated_and_Phenolic_HighOC	CHONS	0.389465	0	0.294697	0	0	0
847	C13H13O9N1S0	8	0.692308	1	326.052	0.0769231	13	13	1	9	0	0	0.333333	0.615385	78	Highly_Unsaturated_and_Phenolic_HighOC	CHON	1.99451	2.0981	2.19137	1.28487	1.17539	1.5266
848	C13H13O9N1S1	8	0.692308	1	358.024	0.0769231	13	13	1	9	1	0	0.230769	0.769231	43	Highly_Unsaturated_and_Phenolic_HighOC	CHONS	0.306795	0	0.294761	0	0	0
849	C13H14O10N0S0	7	0.769231	1.07692	329.051	0	13	14	0	10	0	0	0.25	0.461538	78	Highly_Unsaturated_and_Phenolic_HighOC	CHO	5.70949	6.57482	8.89622	2.78576	2.6363	3.38164
850	C13H14O10N0S1	7	0.769231	1.07692	361.023	0	13	14	0	10	1	0	0.142857	0.615385	61	Highly_Unsaturated_and_Phenolic_HighOC	CHOS	0.452047	0.533471	0.483627	0	0.236495	0.329325
851	C13H14O10N2S0	8	0.769231	1.07692	357.058	0.153846	13	14	2	10	0	0	0.166667	0.923077	78	Highly_Unsaturated_and_Phenolic_HighOC	CHON	0.268735	0.236017	0.338324	0.175779	0.201285	0.244782
852	C13H14O11N0S0	7	0.846154	1.07692	345.046	0	13	14	0	11	0	0	0.2	0.615385	78	Highly_Unsaturated_and_Phenolic_HighOC	CHO	1.82997	1.43318	3.27138	0.851519	0.878478	1.22124
853	C13H14O11N0S1	7	0.846154	1.07692	377.018	0	13	14	0	11	1	0	0.0769231	0.769231	47	Highly_Unsaturated_and_Phenolic_HighOC	CHOS	0.15336	0.162096	0.147114	0	0.114512	0.136573
854	C13H14O11N2S0	8	0.846154	1.07692	373.052	0.153846	13	14	2	11	0	0	0.0909091	1.07692	12	Highly_Unsaturated_and_Phenolic_HighOC	CHON	0.087163	0	0.0871479	0	0	0
855	C13H14O12N0S0	7	0.923077	1.07692	361.041	0	13	14	0	12	0	0	0.142857	0.769231	77	Sugars_wo_X	CHO	0.360512	0.210074	0.545851	0.21	0.216838	0.225985
856	C13H14O13N0S0	7	1	1.07692	377.036	0	13	14	0	13	0	0	0.0769231	0.923077	3	Sugars_wo_X	CHO	0	0	0.068977	0	0	0
857	C13H14O2N0S0	7	0.153846	1.07692	201.092	0	13	14	0	2	0	0.454545	0.5	-0.769231	72	Highly_Unsaturated_and_Phenolic_LowOC	CHO	1.08203	1.36324	1.16607	1.58276	1.1456	1.72329
858	C13H14O2N2S0	8	0.153846	1.07692	229.098	0.153846	13	14	2	2	0	0.444444	0.5	-0.307692	14	Highly_Unsaturated_and_Phenolic_LowOC	CHON	0.293861	0	0	0	0	0
859	C13H14O3N0S0	7	0.230769	1.07692	217.087	0	13	14	0	3	0	0.4	0.478261	-0.615385	76	Highly_Unsaturated_and_Phenolic_LowOC	CHO	1.95344	2.39975	2.20665	3.17379	2.09087	3.032
860	C13H14O3N2S0	8	0.230769	1.07692	245.093	0.153846	13	14	2	3	0	0.375	0.473684	-0.153846	57	Highly_Unsaturated_and_Phenolic_LowOC	CHON	0.645887	0	0.585495	0	0.47982	0.719316
861	C13H14O4N0S0	7	0.307692	1.07692	233.082	0	13	14	0	4	0	0.333333	0.454545	-0.461538	77	Highly_Unsaturated_and_Phenolic_LowOC	CHO	2.71615	3.4499	3.24648	3.66591	2.47263	3.41911
862	C13H14O4N2S0	8	0.307692	1.07692	261.088	0.153846	13	14	2	4	0	0.285714	0.444444	0	76	Highly_Unsaturated_and_Phenolic_LowOC	CHON	0.799473	0.891784	0.732396	0.99675	0.677481	0.899832
863	C13H14O5N0S0	7	0.384615	1.07692	249.077	0	13	14	0	5	0	0.25	0.428571	-0.307692	78	Highly_Unsaturated_and_Phenolic_LowOC	CHO	3.37131	4.59945	3.90696	3.92766	2.6278	3.50573
864	C13H14O5N0S1	7	0.384615	1.07692	281.049	0	13	14	0	5	1	0.142857	0.368421	-0.153846	51	Highly_Unsaturated_and_Phenolic_LowOC	CHOS	0.266194	0.498374	0.223739	0	0	0
865	C13H14O5N2S0	8	0.384615	1.07692	277.083	0.153846	13	14	2	5	0	0.166667	0.411765	0.153846	78	Highly_Unsaturated_and_Phenolic_LowOC	CHON	1.11268	1.13717	1.00076	1.26267	0.827876	1.06062
866	C13H14O6N0S0	7	0.461538	1.07692	265.072	0	13	14	0	6	0	0.142857	0.4	-0.153846	78	Highly_Unsaturated_and_Phenolic_LowOC	CHO	3.90641	6.05481	4.51331	4.13023	2.61959	3.3805
867	C13H14O6N0S1	7	0.461538	1.07692	297.044	0	13	14	0	6	1	0	0.333333	0	67	Highly_Unsaturated_and_Phenolic_LowOC	CHOS	0.336944	0.733595	0.309267	0	0	0.231954
868	C13H14O6N2S0	8	0.461538	1.07692	293.078	0.153846	13	14	2	6	0	0	0.375	0.307692	78	Highly_Unsaturated_and_Phenolic_LowOC	CHON	1.4495	1.57599	1.27829	1.57191	1.11565	1.45176
869	C13H14O7N0S0	7	0.538462	1.07692	281.067	0	13	14	0	7	0	0	0.368421	0	78	Highly_Unsaturated_and_Phenolic_HighOC	CHO	5.79734	8.96256	6.36719	4.44481	3.28453	3.81325
870	C13H14O7N0S1	7	0.538462	1.07692	313.039	0	13	14	0	7	1	0	0.294118	0.153846	75	Highly_Unsaturated_and_Phenolic_HighOC	CHOS	0.632212	1.54589	0.527403	0.29163	0.282286	0.351508
871	C13H14O7N2S0	8	0.538462	1.07692	309.073	0.153846	13	14	2	7	0	0	0.333333	0.461538	78	Highly_Unsaturated_and_Phenolic_HighOC	CHON	1.71833	1.87674	1.47293	1.56524	1.18671	1.55641
872	C13H14O8N0S0	7	0.615385	1.07692	297.062	0	13	14	0	8	0	0	0.333333	0.153846	78	Highly_Unsaturated_and_Phenolic_HighOC	CHO	7.45701	11.2237	8.41866	4.73911	3.51702	4.04038
873	C13H14O8N0S1	7	0.615385	1.07692	329.034	0	13	14	0	8	1	0	0.25	0.307692	75	Highly_Unsaturated_and_Phenolic_HighOC	CHOS	0.841239	2.00204	0.69386	0.349138	0.353155	0.422462
874	C13H14O8N2S0	8	0.615385	1.07692	325.068	0.153846	13	14	2	8	0	0	0.285714	0.615385	78	Highly_Unsaturated_and_Phenolic_HighOC	CHON	1.52685	1.97334	1.48948	1.25733	1.09718	1.53918
875	C13H14O9N0S0	7	0.692308	1.07692	313.057	0	13	14	0	9	0	0	0.294118	0.307692	78	Highly_Unsaturated_and_Phenolic_HighOC	CHO	9.09997	11.9234	10.7605	4.57318	3.83426	4.47656
876	C13H14O9N0S1	7	0.692308	1.07692	345.029	0	13	14	0	9	1	0	0.2	0.461538	72	Highly_Unsaturated_and_Phenolic_HighOC	CHOS	0.806054	1.29999	0.701294	0.342043	0.315027	0.45053
877	C13H14O9N2S0	8	0.692308	1.07692	341.063	0.153846	13	14	2	9	0	0	0.230769	0.769231	78	Highly_Unsaturated_and_Phenolic_HighOC	CHON	0.809775	0.937591	0.851007	0.629249	0.53055	0.765503
878	C13H15O10N1S0	7	0.769231	1.15385	344.062	0.0769231	13	15	1	10	0	0	0.142857	0.615385	78	Highly_Unsaturated_and_Phenolic_HighOC	CHON	0.661997	1.02139	0.930039	0.439198	0.442943	0.631809
879	C13H15O10N1S1	7	0.769231	1.15385	376.034	0.0769231	13	15	1	10	1	0	0	0.769231	25	Highly_Unsaturated_and_Phenolic_HighOC	CHONS	0.132424	0	0.134801	0	0	0
880	C13H15O11N1S0	7	0.846154	1.15385	360.057	0.0769231	13	15	1	11	0	0	0.0769231	0.769231	65	Highly_Unsaturated_and_Phenolic_HighOC	CHON	0.172178	0.174109	0.227147	0.131125	0.116788	0.179458
881	C13H15O11N1S1	7	0.846154	1.15385	392.029	0.0769231	13	15	1	11	1	0	0	0.923077	1	Highly_Unsaturated_and_Phenolic_HighOC	CHONS	0	0	0.0589862	0	0	0
882	C13H15O2N1S0	7	0.153846	1.15385	216.103	0.0769231	13	15	1	2	0	0.4	0.454545	-0.615385	25	Highly_Unsaturated_and_Phenolic_LowOC	CHON	0.310879	0	0.281063	0	0.297166	0.50129
883	C13H15O3N1S0	7	0.230769	1.15385	232.098	0.0769231	13	15	1	3	0	0.333333	0.428571	-0.461538	69	Highly_Unsaturated_and_Phenolic_LowOC	CHON	0.533249	0.662244	0.565961	0.661968	0.505409	0.77905
884	C13H15O4N1S0	7	0.307692	1.15385	248.093	0.0769231	13	15	1	4	0	0.25	0.4	-0.307692	78	Highly_Unsaturated_and_Phenolic_LowOC	CHON	0.890358	1.32499	0.870073	1.00151	0.69515	1.02531
885	C13H15O5N1S0	7	0.384615	1.15385	264.088	0.0769231	13	15	1	5	0	0.142857	0.368421	-0.153846	78	Highly_Unsaturated_and_Phenolic_LowOC	CHON	1.03779	1.85608	1.0632	1.36008	0.776312	1.10859
886	C13H15O6N1S0	7	0.461538	1.15385	280.083	0.0769231	13	15	1	6	0	0	0.333333	0	78	Highly_Unsaturated_and_Phenolic_LowOC	CHON	1.43285	2.90724	1.48927	1.59094	1.04106	1.35811
887	C13H15O6N1S1	7	0.461538	1.15385	312.055	0.0769231	13	15	1	6	1	0	0.25	0.153846	39	Highly_Unsaturated_and_Phenolic_LowOC	CHONS	0.178819	0	0.175872	0	0	0
888	C13H15O7N1S0	7	0.538462	1.15385	296.078	0.0769231	13	15	1	7	0	0	0.294118	0.153846	78	Highly_Unsaturated_and_Phenolic_HighOC	CHON	2.02886	4.52582	1.99273	1.83441	1.37035	1.59777
889	C13H15O7N1S1	7	0.538462	1.15385	328.05	0.0769231	13	15	1	7	1	0	0.2	0.307692	48	Highly_Unsaturated_and_Phenolic_HighOC	CHONS	0.297734	0	0.25026	0	0	0
890	C13H15O8N1S0	7	0.615385	1.15385	312.072	0.0769231	13	15	1	8	0	0	0.25	0.307692	78	Highly_Unsaturated_and_Phenolic_HighOC	CHON	2.64797	4.96486	2.71155	1.81246	1.49805	1.93471
891	C13H15O8N1S1	7	0.615385	1.15385	344.045	0.0769231	13	15	1	8	1	0	0.142857	0.461538	48	Highly_Unsaturated_and_Phenolic_HighOC	CHONS	0.398874	0	0.322517	0	0	0
892	C13H15O9N1S0	7	0.692308	1.15385	328.067	0.0769231	13	15	1	9	0	0	0.2	0.461538	78	Highly_Unsaturated_and_Phenolic_HighOC	CHON	1.78229	3.24721	2.01345	1.309	1.07617	1.46065
893	C13H15O9N1S1	7	0.692308	1.15385	360.039	0.0769231	13	15	1	9	1	0	0.0769231	0.615385	40	Highly_Unsaturated_and_Phenolic_HighOC	CHONS	0.267449	0	0.266791	0	0	0
894	C13H16O10N0S0	6	0.769231	1.23077	331.067	0	13	16	0	10	0	0	0.125	0.307692	78	Highly_Unsaturated_and_Phenolic_HighOC	CHO	3.17578	6.1241	5.28494	1.70095	1.59274	2.23673
895	C13H16O10N0S1	6	0.769231	1.23077	363.039	0	13	16	0	10	1	0	0	0.461538	60	Highly_Unsaturated_and_Phenolic_HighOC	CHOS	0.424636	0.766629	0.426707	0	0.279785	0.474576
896	C13H16O10N2S0	7	0.769231	1.23077	359.073	0.153846	13	16	2	10	0	0	0	0.769231	76	Highly_Unsaturated_and_Phenolic_HighOC	CHON	0.171255	0.326436	0.218328	0	0.150459	0.179035
897	C13H16O11N0S0	6	0.846154	1.23077	347.062	0	13	16	0	11	0	0	0.0666667	0.461538	78	Highly_Unsaturated_and_Phenolic_HighOC	CHO	0.831558	0.953438	1.33764	0.414826	0.451312	0.627406
898	C13H16O11N0S1	6	0.846154	1.23077	379.034	0	13	16	0	11	1	0	0	0.615385	47	Highly_Unsaturated_and_Phenolic_HighOC	CHOS	0.15938	0.194552	0.193447	0	0.101107	0.174971
899	C13H16O11N2S0	7	0.846154	1.23077	375.068	0.153846	13	16	2	11	0	0	0	0.923077	14	Highly_Unsaturated_and_Phenolic_HighOC	CHON	0.0758932	0	0.0750695	0	0	0.0788279
900	C13H16O12N0S0	6	0.923077	1.23077	363.057	0	13	16	0	12	0	0	0	0.615385	55	Sugars_wo_X	CHO	0.139957	0.124467	0.21624	0	0.107585	0.132213
901	C13H16O2N0S0	6	0.153846	1.23077	203.108	0	13	16	0	2	0	0.363636	0.416667	-0.923077	75	Highly_Unsaturated_and_Phenolic_LowOC	CHO	0.847426	1.2497	0.909717	2.09032	1.04042	1.68316
902	C13H16O2N2S0	7	0.153846	1.23077	231.114	0.153846	13	16	2	2	0	0.333333	0.4	-0.461538	13	Highly_Unsaturated_and_Phenolic_LowOC	CHON	0.185762	0	0	0	0	0
903	C13H16O3N0S0	6	0.230769	1.23077	219.103	0	13	16	0	3	0	0.3	0.391304	-0.769231	77	Highly_Unsaturated_and_Phenolic_LowOC	CHO	1.28513	2.17741	1.50439	3.28038	1.78732	2.61381
904	C13H16O3N2S0	7	0.230769	1.23077	247.109	0.153846	13	16	2	3	0	0.25	0.368421	-0.307692	57	Highly_Unsaturated_and_Phenolic_LowOC	CHON	0.406862	0	0.299234	0	0.342989	0.454891
905	C13H16O4N0S0	6	0.307692	1.23077	235.098	0	13	16	0	4	0	0.222222	0.363636	-0.615385	78	Highly_Unsaturated_and_Phenolic_LowOC	CHO	2.00714	3.0798	2.47915	3.88442	2.15128	3.13462
906	C13H16O4N2S0	7	0.307692	1.23077	263.104	0.153846	13	16	2	4	0	0.142857	0.333333	-0.153846	76	Highly_Unsaturated_and_Phenolic_LowOC	CHON	0.483254	0.777737	0.428156	1.13681	0.395387	0.555648
907	C13H16O5N0S0	6	0.384615	1.23077	251.092	0	13	16	0	5	0	0.125	0.333333	-0.461538	78	Highly_Unsaturated_and_Phenolic_LowOC	CHO	2.39412	5.11356	2.84276	3.9274	2.2969	3.14393
908	C13H16O5N0S1	6	0.384615	1.23077	283.065	0	13	16	0	5	1	0	0.263158	-0.307692	51	Highly_Unsaturated_and_Phenolic_LowOC	CHOS	0.174069	0.502463	0.157233	0	0	0
909	C13H16O5N2S0	7	0.384615	1.23077	279.099	0.153846	13	16	2	5	0	0	0.294118	0	78	Highly_Unsaturated_and_Phenolic_LowOC	CHON	0.7301	1.26222	0.64495	1.02646	0.567363	0.794164
910	C13H16O6N0S0	6	0.461538	1.23077	267.087	0	13	16	0	6	0	0	0.3	-0.307692	78	Highly_Unsaturated_and_Phenolic_LowOC	CHO	3.61711	8.538	3.98145	4.24074	2.54965	3.29359
911	C13H16O6N0S1	6	0.461538	1.23077	299.059	0	13	16	0	6	1	0	0.222222	-0.153846	67	Highly_Unsaturated_and_Phenolic_LowOC	CHOS	0.273122	0.851368	0.236264	0	0	0.227339
912	C13H16O6N2S0	7	0.461538	1.23077	295.094	0.153846	13	16	2	6	0	0	0.25	0.153846	78	Highly_Unsaturated_and_Phenolic_LowOC	CHON	1.00729	2.34917	0.879744	1.34964	0.822424	1.0828
913	C13H16O7N0S1	6	0.538462	1.23077	315.054	0	13	16	0	7	1	0	0.176471	0	75	Highly_Unsaturated_and_Phenolic_HighOC	CHOS	0.558618	1.7061	0.444239	0.454722	0.371369	0.49676
914	C13H16O7N2S0	7	0.538462	1.23077	311.088	0.153846	13	16	2	7	0	0	0.2	0.307692	78	Highly_Unsaturated_and_Phenolic_HighOC	CHON	1.35379	3.12969	1.20774	1.35357	0.92164	1.23462
915	C13H16O8N0S0	6	0.615385	1.23077	299.077	0	13	16	0	8	0	0	0.222222	0	78	Highly_Unsaturated_and_Phenolic_HighOC	CHO	8.04772	19.4051	8.65455	10.3666	3.28316	4.06188
916	C13H16O8N0S1	6	0.615385	1.23077	331.049	0	13	16	0	8	1	0	0.125	0.153846	75	Highly_Unsaturated_and_Phenolic_HighOC	CHOS	0.860179	2.40427	0.693519	0.621738	0.476741	0.725878
917	C13H16O8N2S0	7	0.615385	1.23077	327.083	0.153846	13	16	2	8	0	0	0.142857	0.461538	78	Highly_Unsaturated_and_Phenolic_HighOC	CHON	1.16955	2.91785	1.11183	1.06519	0.85369	1.17844
918	C13H16O9N0S0	6	0.692308	1.23077	315.072	0	13	16	0	9	0	0	0.176471	0.153846	78	Highly_Unsaturated_and_Phenolic_HighOC	CHO	6.78882	16.4309	9.13142	3.69946	3.10429	3.89093
919	C13H16O9N0S1	6	0.692308	1.23077	347.044	0	13	16	0	9	1	0	0.0666667	0.307692	72	Highly_Unsaturated_and_Phenolic_HighOC	CHOS	0.814192	1.63334	0.727858	0.535601	0.512272	0.766689
920	C13H16O9N2S0	7	0.692308	1.23077	343.078	0.153846	13	16	2	9	0	0	0.0769231	0.615385	78	Highly_Unsaturated_and_Phenolic_HighOC	CHON	0.558951	1.09817	0.575632	0.437528	0.38535	0.57381
921	C13H17O10N1S0	6	0.769231	1.30769	346.078	0.0769231	13	17	1	10	0	0	0	0.461538	77	Highly_Unsaturated_and_Phenolic_HighOC	CHON	0.349726	0.785046	0.4171	0.206077	0.182494	0.286439
922	C13H17O10N1S1	6	0.769231	1.30769	378.05	0.0769231	13	17	1	10	1	0	0	0.615385	22	Highly_Unsaturated_and_Phenolic_HighOC	CHONS	0.0900977	0	0.0822057	0	0	0
923	C13H17O11N1S0	6	0.846154	1.30769	362.073	0.0769231	13	17	1	11	0	0	0	0.615385	56	Highly_Unsaturated_and_Phenolic_HighOC	CHON	0.0881614	0.209821	0.126557	0	0	0.0886497
924	C13H17O2N1S0	6	0.153846	1.30769	218.119	0.0769231	13	17	1	2	0	0.3	0.363636	-0.769231	15	Highly_Unsaturated_and_Phenolic_LowOC	CHON	0.158775	0	0.129838	0	0.159181	0.286693
925	C13H17O3N1S0	6	0.230769	1.30769	234.114	0.0769231	13	17	1	3	0	0.222222	0.333333	-0.615385	65	Highly_Unsaturated_and_Phenolic_LowOC	CHON	0.286933	0.462626	0.301364	0.520243	0.280459	0.441047
926	C13H17O4N1S0	6	0.307692	1.30769	250.108	0.0769231	13	17	1	4	0	0.125	0.3	-0.461538	78	Highly_Unsaturated_and_Phenolic_LowOC	CHON	0.397513	0.895872	0.413947	0.621404	0.385029	0.500909
927	C13H17O5N1S0	6	0.384615	1.30769	266.103	0.0769231	13	17	1	5	0	0	0.263158	-0.307692	78	Highly_Unsaturated_and_Phenolic_LowOC	CHON	0.570417	1.58467	0.577464	0.7239	0.461189	0.666651
928	C13H17O6N1S0	6	0.461538	1.30769	282.098	0.0769231	13	17	1	6	0	0	0.222222	-0.153846	78	Highly_Unsaturated_and_Phenolic_LowOC	CHON	0.899691	2.62571	0.880937	1.16485	0.666065	0.835695
929	C13H17O6N1S1	6	0.461538	1.30769	314.07	0.0769231	13	17	1	6	1	0	0.125	0	28	Highly_Unsaturated_and_Phenolic_LowOC	CHONS	0.127749	0	0.10142	0	0	0
930	C13H17O7N1S0	6	0.538462	1.30769	298.093	0.0769231	13	17	1	7	0	0	0.176471	0	78	Highly_Unsaturated_and_Phenolic_HighOC	CHON	1.13319	4.24038	1.11865	1.17862	0.745079	0.95889
931	C13H17O7N1S1	6	0.538462	1.30769	330.065	0.0769231	13	17	1	7	1	0	0.0666667	0.153846	46	Highly_Unsaturated_and_Phenolic_HighOC	CHONS	0.250628	0	0.206143	0	0	0
932	C13H17O8N1S0	6	0.615385	1.30769	314.088	0.0769231	13	17	1	8	0	0	0.125	0.153846	78	Highly_Unsaturated_and_Phenolic_HighOC	CHON	1.42507	5.62269	1.42939	1.1116	0.782212	1.03221
933	C13H17O8N1S1	6	0.615385	1.30769	346.06	0.0769231	13	17	1	8	1	0	0	0.307692	46	Highly_Unsaturated_and_Phenolic_HighOC	CHONS	0.343161	0	0.229746	0	0	0
934	C13H17O9N1S0	6	0.692308	1.30769	330.083	0.0769231	13	17	1	9	0	0	0.0666667	0.307692	78	Highly_Unsaturated_and_Phenolic_HighOC	CHON	0.886243	2.67897	1.01523	0.59002	0.529171	0.72537
935	C13H17O9N1S1	6	0.692308	1.30769	362.055	0.0769231	13	17	1	9	1	0	0	0.461538	33	Highly_Unsaturated_and_Phenolic_HighOC	CHONS	0.233973	0	0.194703	0	0	0
936	C13H18O10N0S0	5	0.769231	1.38462	333.083	0	13	18	0	10	0	0	0	0.153846	78	Highly_Unsaturated_and_Phenolic_HighOC	CHO	0.836308	1.9529	1.19902	0.456725	0.482898	0.61877
937	C13H18O10N0S1	5	0.769231	1.38462	365.055	0	13	18	0	10	1	0	0	0.307692	56	Highly_Unsaturated_and_Phenolic_HighOC	CHOS	0.375715	0.828175	0.374261	0	0.244544	0.43965
938	C13H18O10N2S0	6	0.769231	1.38462	361.089	0.153846	13	18	2	10	0	0	0	0.615385	63	Highly_Unsaturated_and_Phenolic_HighOC	CHON	0.0981151	0.315075	0.0930912	0	0	0
939	C13H18O11N0S0	5	0.846154	1.38462	349.078	0	13	18	0	11	0	0	0	0.307692	78	Highly_Unsaturated_and_Phenolic_HighOC	CHO	0.282395	0.584162	0.320771	0.12378	0.13295	0.198298
940	C13H18O11N0S1	5	0.846154	1.38462	381.05	0	13	18	0	11	1	0	0	0.461538	45	Highly_Unsaturated_and_Phenolic_HighOC	CHOS	0.0910507	0.244303	0.110282	0	0	0.114051
941	C13H18O12N0S0	5	0.923077	1.38462	365.073	0	13	18	0	12	0	0	0	0.461538	57	Sugars_wo_X	CHO	0.0771488	0.185072	0.0850177	0	0	0
942	C13H18O2N0S0	5	0.153846	1.38462	205.123	0	13	18	0	2	0	0.272727	0.333333	-1.07692	74	Highly_Unsaturated_and_Phenolic_LowOC	CHO	0.5583	0.897537	0.601024	1.50397	0.689025	1.03192
943	C13H18O3N0S0	5	0.230769	1.38462	221.118	0	13	18	0	3	0	0.2	0.304348	-0.923077	77	Highly_Unsaturated_and_Phenolic_LowOC	CHO	0.748752	1.50562	0.874397	1.96504	1.00123	1.37534
944	C13H18O3N2S0	6	0.230769	1.38462	249.124	0.153846	13	18	2	3	0	0.125	0.263158	-0.461538	51	Highly_Unsaturated_and_Phenolic_LowOC	CHON	0.138157	0	0.136527	0	0.13218	0.181575
945	C13H18O4N0S0	5	0.307692	1.38462	237.113	0	13	18	0	4	0	0.111111	0.272727	-0.769231	78	Highly_Unsaturated_and_Phenolic_LowOC	CHO	1.13884	2.6391	1.29831	2.59011	1.22881	1.74996
946	C13H18O4N2S0	6	0.307692	1.38462	265.119	0.153846	13	18	2	4	0	0	0.222222	-0.307692	76	Highly_Unsaturated_and_Phenolic_LowOC	CHON	0.214549	0.585248	0.192296	0.290211	0.16614	0.235002
947	C13H18O5N0S0	5	0.384615	1.38462	253.108	0	13	18	0	5	0	0	0.238095	-0.615385	78	Highly_Unsaturated_and_Phenolic_LowOC	CHO	1.51914	4.70434	1.67862	2.52551	1.28448	1.71749
948	C13H18O5N2S0	6	0.384615	1.38462	281.114	0.153846	13	18	2	5	0	0	0.176471	-0.153846	78	Highly_Unsaturated_and_Phenolic_LowOC	CHON	0.368106	1.02801	0.321495	0.457894	0.26388	0.359975
949	C13H18O6N0S0	5	0.461538	1.38462	269.103	0	13	18	0	6	0	0	0.2	-0.461538	78	Highly_Unsaturated_and_Phenolic_LowOC	CHO	2.41759	10.0746	2.35046	2.90762	1.40409	1.79772
950	C13H18O6N0S1	5	0.461538	1.38462	301.075	0	13	18	0	6	1	0	0.111111	-0.307692	67	Highly_Unsaturated_and_Phenolic_LowOC	CHOS	0.297643	0.904339	0.239225	0	0	0.322932
951	C13H18O6N2S0	6	0.461538	1.38462	297.109	0.153846	13	18	2	6	0	0	0.125	0	78	Highly_Unsaturated_and_Phenolic_LowOC	CHON	0.496263	2.24232	0.43018	0.618315	0.327052	0.407729
952	C13H18O7N0S0	5	0.538462	1.38462	285.098	0	13	18	0	7	0	0	0.157895	-0.307692	78	Highly_Unsaturated_and_Phenolic_HighOC	CHO	3.914	18.1309	3.85127	3.25333	1.77305	2.16032
953	C13H18O7N0S1	5	0.538462	1.38462	317.07	0	13	18	0	7	1	0	0.0588235	-0.153846	75	Highly_Unsaturated_and_Phenolic_HighOC	CHOS	0.63377	2.01361	0.49087	0.662886	0.436241	0.606281
954	C13H18O7N2S0	6	0.538462	1.38462	313.104	0.153846	13	18	2	7	0	0	0.0666667	0.153846	78	Highly_Unsaturated_and_Phenolic_HighOC	CHON	0.703582	2.91499	0.574354	0.612222	0.378327	0.54951
955	C13H18O8N0S0	5	0.615385	1.38462	301.093	0	13	18	0	8	0	0	0.111111	-0.153846	78	Highly_Unsaturated_and_Phenolic_HighOC	CHO	3.76022	14.6232	4.29466	2.28855	1.49336	1.9138
956	C13H18O8N0S1	5	0.615385	1.38462	333.065	0	13	18	0	8	1	0	0	0	75	Highly_Unsaturated_and_Phenolic_HighOC	CHOS	0.975055	3.09221	0.807444	0.805947	0.593305	0.890984
957	C13H18O8N2S0	6	0.615385	1.38462	329.099	0.153846	13	18	2	8	0	0	0	0.307692	78	Highly_Unsaturated_and_Phenolic_HighOC	CHON	0.595301	2.87891	0.529086	0.451801	0.319933	0.452901
958	C13H18O9N0S0	5	0.692308	1.38462	317.088	0	13	18	0	9	0	0	0.0588235	0	78	Highly_Unsaturated_and_Phenolic_HighOC	CHO	2.04934	7.57837	2.72135	1.3418	1.04991	1.35604
959	C13H18O9N0S1	5	0.692308	1.38462	349.06	0	13	18	0	9	1	0	0	0.153846	72	Highly_Unsaturated_and_Phenolic_HighOC	CHOS	0.887226	2.08012	0.74767	0.557803	0.50977	0.808685
960	C13H18O9N2S0	6	0.692308	1.38462	345.094	0.153846	13	18	2	9	0	0	0	0.461538	77	Highly_Unsaturated_and_Phenolic_HighOC	CHON	0.293271	0.883932	0.277825	0.177198	0.153024	0.205029
961	C13H19O10N1S0	5	0.769231	1.46154	348.094	0.0769231	13	19	1	10	0	0	0	0.307692	70	Highly_Unsaturated_and_Phenolic_HighOC	CHON	0.178199	0.723645	0.152717	0.122611	0	0.0993181
962	C13H19O11N1S0	5	0.846154	1.46154	364.089	0.0769231	13	19	1	11	0	0	0	0.461538	49	Highly_Unsaturated_and_Phenolic_HighOC	CHON	0.0866336	0.354007	0.111731	0	0	0
963	C13H19O2N1S0	5	0.153846	1.46154	220.134	0.0769231	13	19	1	2	0	0.2	0.272727	-0.923077	2	Highly_Unsaturated_and_Phenolic_LowOC	CHON	0	0	0	0	0	0.0871256
964	C13H19O3N1S0	5	0.230769	1.46154	236.129	0.0769231	13	19	1	3	0	0.111111	0.238095	-0.769231	39	Highly_Unsaturated_and_Phenolic_LowOC	CHON	0.0908389	0.202259	0.103572	0.148736	0	0.104652
965	C13H19O4N1S0	5	0.307692	1.46154	252.124	0.0769231	13	19	1	4	0	0	0.2	-0.615385	65	Highly_Unsaturated_and_Phenolic_LowOC	CHON	0.125979	0.405458	0.10975	0.225358	0.128204	0.165149
966	C13H19O5N1S0	5	0.384615	1.46154	268.119	0.0769231	13	19	1	5	0	0	0.157895	-0.461538	73	Highly_Unsaturated_and_Phenolic_LowOC	CHON	0.181496	0.943488	0.182114	0.319424	0.131218	0.225138
967	C13H19O6N1S0	5	0.461538	1.46154	284.114	0.0769231	13	19	1	6	0	0	0.111111	-0.307692	78	Highly_Unsaturated_and_Phenolic_LowOC	CHON	0.312014	1.73342	0.277506	0.421753	0.193942	0.270945
968	C13H19O6N1S1	5	0.461538	1.46154	316.086	0.0769231	13	19	1	6	1	0	0	-0.153846	22	Highly_Unsaturated_and_Phenolic_LowOC	CHONS	0.0759084	0	0.0723002	0	0	0
969	C13H19O7N1S0	5	0.538462	1.46154	300.109	0.0769231	13	19	1	7	0	0	0.0588235	-0.153846	78	Highly_Unsaturated_and_Phenolic_HighOC	CHON	0.392491	2.34179	0.364632	0.339706	0.197277	0.283645
970	C13H19O7N1S1	5	0.538462	1.46154	332.081	0.0769231	13	19	1	7	1	0	0	0	29	Highly_Unsaturated_and_Phenolic_HighOC	CHONS	0.141439	0	0.130328	0	0	0
971	C13H19O8N1S0	5	0.615385	1.46154	316.104	0.0769231	13	19	1	8	0	0	0	0	78	Highly_Unsaturated_and_Phenolic_HighOC	CHON	0.443121	2.49006	0.386638	0.313081	0.22665	0.269632
972	C13H19O8N1S1	5	0.615385	1.46154	348.076	0.0769231	13	19	1	8	1	0	0	0.153846	33	Highly_Unsaturated_and_Phenolic_HighOC	CHONS	0.208967	0	0.185096	0	0	0
973	C13H19O9N1S0	5	0.692308	1.46154	332.099	0.0769231	13	19	1	9	0	0	0	0.153846	77	Highly_Unsaturated_and_Phenolic_HighOC	CHON	0.351829	1.82221	0.325436	0.210251	0.145264	0.224842
974	C13H19O9N1S1	5	0.692308	1.46154	364.071	0.0769231	13	19	1	9	1	0	0	0.307692	28	Highly_Unsaturated_and_Phenolic_HighOC	CHONS	0.138822	0	0.124406	0	0	0
975	C13H20O10N0S0	4	0.769231	1.53846	335.098	0	13	20	0	10	0	0	0	0	76	Aliphatic_HighOC	CHO	0.224442	1.00127	0.194916	0.204325	0	0.12527
976	C13H20O10N0S1	4	0.769231	1.53846	367.07	0	13	20	0	10	1	0	0	0.153846	46	Aliphatic_HighOC	CHOS	0.199452	0.569979	0.17862	0	0.104122	0.135853
977	C13H20O10N2S0	5	0.769231	1.53846	363.105	0.153846	13	20	2	10	0	0	0	0.461538	34	Peptide_like	CHON	0	0.210472	0	0	0	0
978	C13H20O11N0S0	4	0.846154	1.53846	351.093	0	13	20	0	11	0	0	0	0.153846	56	Aliphatic_HighOC	CHO	0	0.699837	0.134652	0	0	0
979	C13H20O11N0S1	4	0.846154	1.53846	383.065	0	13	20	0	11	1	0	0	0.307692	17	Aliphatic_HighOC	CHOS	0	0.147841	0	0	0	0
980	C13H20O12N0S0	4	0.923077	1.53846	367.088	0	13	20	0	12	0	0	0	0.307692	47	Sugars_wo_X	CHO	0.0801137	0.287938	0	0	0	0
981	C13H20O2N0S0	4	0.153846	1.53846	207.139	0	13	20	0	2	0	0.181818	0.25	-1.23077	58	Aliphatic_LowOC	CHO	0.170363	0.393048	0.190251	0.558637	0.175118	0.311205
982	C13H20O3N0S0	4	0.230769	1.53846	223.134	0	13	20	0	3	0	0.1	0.217391	-1.07692	69	Aliphatic_LowOC	CHO	0.259795	0.691009	0.282789	0.682083	0.269524	0.419287
983	C13H20O4N0S0	4	0.307692	1.53846	239.129	0	13	20	0	4	0	0	0.181818	-0.923077	77	Aliphatic_LowOC	CHO	0.363189	1.35568	0.443387	0.81204	0.331253	0.460902
984	C13H20O4N2S0	5	0.307692	1.53846	267.135	0.153846	13	20	2	4	0	0	0.111111	-0.461538	55	Peptide_like	CHON	0.0956796	0.34185	0.0692113	0	0	0
985	C13H20O5N0S0	4	0.384615	1.53846	255.124	0	13	20	0	5	0	0	0.142857	-0.769231	78	Aliphatic_LowOC	CHO	0.55656	2.41176	0.545489	0.804528	0.322402	0.437957
986	C13H20O5N0S1	4	0.384615	1.53846	287.096	0	13	20	0	5	1	0	0.0526316	-0.615385	45	Aliphatic_LowOC	CHOS	0.101912	0.402166	0.0947315	0	0	0
987	C13H20O5N2S0	5	0.384615	1.53846	283.13	0.153846	13	20	2	5	0	0	0.0588235	-0.307692	74	Peptide_like	CHON	0.128264	0.694301	0.0952428	0	0	0.0955503
988	C13H20O6N0S0	4	0.461538	1.53846	271.119	0	13	20	0	6	0	0	0.1	-0.615385	78	Aliphatic_LowOC	CHO	0.729691	4.67095	0.746008	0.899178	0.346549	0.47682
989	C13H20O6N0S1	4	0.461538	1.53846	303.091	0	13	20	0	6	1	0	0	-0.461538	61	Aliphatic_LowOC	CHOS	0.305797	1.01383	0.233921	0	0	0.219253
990	C13H20O6N2S0	5	0.461538	1.53846	299.125	0.153846	13	20	2	6	0	0	0	-0.153846	75	Peptide_like	CHON	0.182464	1.3009	0.146581	0.174694	0	0.109182
991	C13H20O7N0S0	4	0.538462	1.53846	287.114	0	13	20	0	7	0	0	0.0526316	-0.461538	78	Aliphatic_HighOC	CHO	0.854098	6.64646	0.878232	0.743598	0.393623	0.473179
992	C13H20O7N0S1	4	0.538462	1.53846	319.086	0	13	20	0	7	1	0	0	-0.307692	75	Aliphatic_HighOC	CHOS	0.621986	2.61145	0.502011	0.614977	0.349531	0.485118
993	C13H20O7N2S0	5	0.538462	1.53846	315.12	0.153846	13	20	2	7	0	0	0	0	75	Peptide_like	CHON	0.293302	2.86111	0.252241	0	0	0.144532
994	C13H20O8N0S0	4	0.615385	1.53846	303.109	0	13	20	0	8	0	0	0	-0.307692	78	Aliphatic_HighOC	CHO	0.734653	6.21354	0.816647	0.538689	0.311019	0.392743
995	C13H20O8N0S1	4	0.615385	1.53846	335.081	0	13	20	0	8	1	0	0	-0.153846	75	Aliphatic_HighOC	CHOS	0.870374	3.80974	0.668744	0.686757	0.406675	0.594977
996	C13H20O8N2S0	5	0.615385	1.53846	331.115	0.153846	13	20	2	8	0	0	0	0.153846	74	Peptide_like	CHON	0.249236	1.61416	0.20872	0	0	0.159222
997	C13H20O9N0S0	4	0.692308	1.53846	319.103	0	13	20	0	9	0	0	0	-0.153846	78	Aliphatic_HighOC	CHO	0.325477	1.62382	0.435249	0.321928	0.156038	0.261758
998	C13H20O9N0S1	4	0.692308	1.53846	351.076	0	13	20	0	9	1	0	0	0	71	Aliphatic_HighOC	CHOS	0.564064	2.36914	0.470334	0.313999	0.260577	0.396341
999	C13H20O9N2S0	5	0.692308	1.53846	347.11	0.153846	13	20	2	9	0	0	0	0.307692	62	Peptide_like	CHON	0.135842	0.470767	0.117419	0	0	0
1000	C13H21O10N1S0	4	0.769231	1.61538	350.109	0.0769231	13	21	1	10	0	0	0	0.153846	48	Peptide_like	CHON	0	0.907957	0	0	0	0
1001	C13H21O11N1S0	4	0.846154	1.61538	366.104	0.0769231	13	21	1	11	0	0	0	0.307692	40	Peptide_like	CHON	0	0.302411	0	0	0	0
1002	C13H21O5N1S0	4	0.384615	1.61538	270.135	0.0769231	13	21	1	5	0	0	0.0526316	-0.615385	31	Peptide_like	CHON	0	0.264384	0	1.0924	0	0
1003	C13H21O6N1S0	4	0.461538	1.61538	286.13	0.0769231	13	21	1	6	0	0	0	-0.461538	49	Peptide_like	CHON	0.0876622	0.803282	0.0649721	0.152242	0	0
1004	C13H21O7N1S0	4	0.538462	1.61538	302.125	0.0769231	13	21	1	7	0	0	0	-0.307692	66	Peptide_like	CHON	0.110671	0.848655	0.0851242	0	0	0
1005	C13H21O7N1S1	4	0.538462	1.61538	334.097	0.0769231	13	21	1	7	1	0	0	-0.153846	27	Peptide_like	CHONS	0.104953	0	0.08293	0	0	0
1006	C13H21O8N1S0	4	0.615385	1.61538	318.119	0.0769231	13	21	1	8	0	0	0	-0.153846	68	Peptide_like	CHON	0.122939	0.847388	0.0937516	0	0	0
1007	C13H21O8N1S1	4	0.615385	1.61538	350.092	0.0769231	13	21	1	8	1	0	0	0	27	Peptide_like	CHONS	0.103984	0	0.0855289	0	0	0
1008	C13H21O9N1S0	4	0.692308	1.61538	334.114	0.0769231	13	21	1	9	0	0	0	0	60	Peptide_like	CHON	0	0.885669	0.112498	0	0	0
1009	C13H22O10N0S0	3	0.769231	1.69231	337.114	0	13	22	0	10	0	0	0	-0.153846	61	Aliphatic_HighOC	CHO	0	0.639159	0	0	0	0
1010	C13H22O10N0S1	3	0.769231	1.69231	369.086	0	13	22	0	10	1	0	0	0	34	Aliphatic_HighOC	CHOS	0	0.405929	0	0	0	0
1011	C13H22O11N0S0	3	0.846154	1.69231	353.109	0	13	22	0	11	0	0	0	0	52	Aliphatic_HighOC	CHO	0	0.775241	0	0	0	0
1012	C13H22O12N0S0	3	0.923077	1.69231	369.104	0	13	22	0	12	0	0	0	0.153846	38	Sugars_wo_X	CHO	0	0.351185	0	0	0	0
1013	C13H22O3N0S0	3	0.230769	1.69231	225.15	0	13	22	0	3	0	0	0.130435	-1.23077	36	Aliphatic_LowOC	CHO	0	0.181454	0	0	0	0
1014	C13H22O4N0S0	3	0.307692	1.69231	241.145	0	13	22	0	4	0	0	0.0909091	-1.07692	48	Aliphatic_LowOC	CHO	0.0695095	0.314351	0.0757298	0.230199	0	0
1015	C13H22O4N2S0	4	0.307692	1.69231	269.151	0.153846	13	22	2	4	0	0	0	-0.615385	35	Peptide_like	CHON	0	0.151748	0	0	0	0
1016	C13H22O5N0S0	3	0.384615	1.69231	257.139	0	13	22	0	5	0	0	0.047619	-0.923077	61	Aliphatic_LowOC	CHO	0.0981	0.651244	0.0796495	0.12403	0	0
1017	C13H22O5N0S1	3	0.384615	1.69231	289.112	0	13	22	0	5	1	0	0	-0.769231	40	Aliphatic_LowOC	CHOS	0	0.238152	0	0	0	0
1018	C13H22O5N2S0	4	0.384615	1.69231	285.146	0.153846	13	22	2	5	0	0	0	-0.461538	44	Peptide_like	CHON	0	0.387114	0	0	0	0
1019	C13H22O6N0S0	3	0.461538	1.69231	273.134	0	13	22	0	6	0	0	0	-0.769231	70	Aliphatic_LowOC	CHO	0.117357	1.36758	0.0947528	0.133045	0	0
1020	C13H22O6N0S1	3	0.461538	1.69231	305.106	0	13	22	0	6	1	0	0	-0.615385	52	Aliphatic_LowOC	CHOS	0.170211	0.910924	0.140638	0	0	0.0882687
1021	C13H22O6N2S0	4	0.461538	1.69231	301.141	0.153846	13	22	2	6	0	0	0	-0.307692	57	Peptide_like	CHON	0.0656672	0.644623	0	0	0	0
1022	C13H22O7N0S0	3	0.538462	1.69231	289.129	0	13	22	0	7	0	0	0	-0.615385	67	Aliphatic_HighOC	CHO	0.102048	1.26164	0.105937	0	0	0
1023	C13H22O7N0S1	3	0.538462	1.69231	321.101	0	13	22	0	7	1	0	0	-0.461538	75	Aliphatic_HighOC	CHOS	0.392309	2.2187	0.262637	0.263585	0.140422	0.163498
1024	C13H22O7N2S0	4	0.538462	1.69231	317.135	0.153846	13	22	2	7	0	0	0	-0.153846	70	Peptide_like	CHON	0.0843493	1.05848	0.0732162	0	0	0
1025	C13H22O8N0S0	3	0.615385	1.69231	305.124	0	13	22	0	8	0	0	0	-0.461538	58	Aliphatic_HighOC	CHO	0.0818685	0.730592	0.0789039	0	0	0
1026	C13H22O8N0S1	3	0.615385	1.69231	337.096	0	13	22	0	8	1	0	0	-0.307692	73	Aliphatic_HighOC	CHOS	0.372931	3.04437	0.272627	0.239631	0	0.19
1027	C13H22O8N2S0	4	0.615385	1.69231	333.13	0.153846	13	22	2	8	0	0	0	0	45	Peptide_like	CHON	0	1.39906	0	0	0	0
1028	C13H22O9N0S0	3	0.692308	1.69231	321.119	0	13	22	0	9	0	0	0	-0.307692	51	Aliphatic_HighOC	CHO	0.0676035	0.48846	0	0.126785	0	0
1029	C13H22O9N0S1	3	0.692308	1.69231	353.091	0	13	22	0	9	1	0	0	-0.153846	48	Aliphatic_HighOC	CHOS	0.211463	1.63037	0.182369	0	0	0.104779
1030	C13H22O9N2S0	4	0.692308	1.69231	349.125	0.153846	13	22	2	9	0	0	0	0.153846	31	Peptide_like	CHON	0	0.466606	0	0	0	0
1031	C13H23O10N1S0	3	0.769231	1.76923	352.125	0.0769231	13	23	1	10	0	0	0	0	29	Peptide_like	CHON	0	0.283054	0	0	0	0
1032	C13H23O11N1S0	3	0.846154	1.76923	368.12	0.0769231	13	23	1	11	0	0	0	0.153846	18	Peptide_like	CHON	0	0.149722	0	0	0	0
1033	C13H23O6N1S0	3	0.461538	1.76923	288.145	0.0769231	13	23	1	6	0	0	0	-0.615385	22	Peptide_like	CHON	0	0.126131	0	0	0	0
1034	C13H23O7N1S0	3	0.538462	1.76923	304.14	0.0769231	13	23	1	7	0	0	0	-0.461538	29	Peptide_like	CHON	0	0.303099	0	0	0	0
1035	C13H23O8N1S0	3	0.615385	1.76923	320.135	0.0769231	13	23	1	8	0	0	0	-0.307692	28	Peptide_like	CHON	0	0.403794	0	0	0	0
1036	C13H23O9N1S0	3	0.692308	1.76923	336.13	0.0769231	13	23	1	9	0	0	0	-0.153846	31	Peptide_like	CHON	0	0.438131	0	0	0	0
1037	C13H24O10N0S0	2	0.769231	1.84615	339.13	0	13	24	0	10	0	0	0	-0.307692	31	Aliphatic_HighOC	CHO	0	0.337978	0	0	0	0
1038	C13H24O5N0S0	2	0.384615	1.84615	259.155	0	13	24	0	5	0	0	0	-1.07692	21	Aliphatic_LowOC	CHO	0	0.133404	0	0	0	0
1039	C13H24O5N0S1	2	0.384615	1.84615	291.127	0	13	24	0	5	1	0	0	-0.923077	28	Aliphatic_LowOC	CHOS	0	0.142667	0	0	0	0
1040	C13H24O6N0S1	2	0.461538	1.84615	307.122	0	13	24	0	6	1	0	0	-0.769231	44	Aliphatic_LowOC	CHOS	0	0.613615	0	0	0	0
1041	C13H24O7N0S1	2	0.538462	1.84615	323.117	0	13	24	0	7	1	0	0	-0.615385	63	Aliphatic_HighOC	CHOS	0.11657	1.3547	0.0803524	0	0	0
1042	C13H24O7N2S0	3	0.538462	1.84615	319.151	0.153846	13	24	2	7	0	0	0	-0.307692	10	Peptide_like	CHON	0	0.271403	0	0	0	0
1043	C13H24O8N0S0	2	0.615385	1.84615	307.14	0	13	24	0	8	0	0	0	-0.615385	26	Aliphatic_HighOC	CHO	0	0.217021	0	0	0	0
1044	C13H24O8N0S1	2	0.615385	1.84615	339.112	0	13	24	0	8	1	0	0	-0.461538	40	Aliphatic_HighOC	CHOS	0	1.10801	0	0	0	0
1045	C13H24O9N0S0	2	0.692308	1.84615	323.135	0	13	24	0	9	0	0	0	-0.461538	31	Aliphatic_HighOC	CHO	0	0.239092	0	0	0	0
1046	C13H24O9N0S1	2	0.692308	1.84615	355.107	0	13	24	0	9	1	0	0	-0.307692	33	Aliphatic_HighOC	CHOS	0	0.54201	0	0	0	0
1047	C13H26O13N2S0	2	1	2	417.136	0.153846	13	26	2	13	0	0	0	0.461538	2	Sugars_w_X	CHON	0	0	0	0.186379	0	0
1048	C13H26O6N0S1	1	0.461538	2	309.138	0	13	26	0	6	1	0	0	-0.923077	32	Aliphatic_LowOC	CHOS	0	0.17382	0	0	0	0
1049	C13H26O7N0S1	1	0.538462	2	325.133	0	13	26	0	7	1	0	0	-0.769231	29	Aliphatic_HighOC	CHOS	0	0.321009	0	0	0	0
1050	C13H26O8N0S1	1	0.615385	2	341.128	0	13	26	0	8	1	0	0	-0.615385	14	Aliphatic_HighOC	CHOS	0	0.149143	0	0	0	0
1051	C13H28O13N2S0	1	1	2.15385	419.152	0.153846	13	28	2	13	0	0	0	0.307692	1	Sugars_w_X	CHON	0	0	0	0.23721	0	0
1052	C13H30O12N2S0	0	0.923077	2.30769	405.173	0.153846	13	30	2	12	0	0	0	0	1	Sugars_w_X	CHON	0	0	0	0.129122	0	0
1053	C13H30O13N2S0	0	1	2.30769	421.168	0.153846	13	30	2	13	0	0	0	0.153846	4	Sugars_w_X	CHON	0	0	0	0.179535	0.116756	0
1054	C13H5O3N1S0	12	0.230769	0.384615	222.02	0.0769231	13	5	1	3	0	0.888889	0.904762	0.307692	34	Condensed_aromatics.X	CHON	0.0917919	0	0	0	0	0
1055	C13H5O4N1S0	12	0.307692	0.384615	238.015	0.0769231	13	5	1	4	0	0.875	0.9	0.461538	59	Condensed_aromatics.X	CHON	0.25447	0	0.1688	0	0	0.125905
1056	C13H5O5N1S0	12	0.384615	0.384615	254.009	0.0769231	13	5	1	5	0	0.857143	0.894737	0.615385	61	Condensed_aromatics.X	CHON	0.286116	0	0.214131	0	0.108964	0.107489
1057	C13H5O6N1S0	12	0.461538	0.384615	270.004	0.0769231	13	5	1	6	0	0.833333	0.888889	0.769231	60	Condensed_aromatics.X	CHON	0.253214	0	0.182007	0	0.107617	0.10152
1058	C13H5O6N1S1	12	0.461538	0.384615	301.976	0.0769231	13	5	1	6	1	0.8	0.875	0.923077	36	Condensed_aromatics.X	CHONS	0.0894623	0	0.0672941	0	0	0
1059	C13H5O7N1S0	12	0.538462	0.384615	285.999	0.0769231	13	5	1	7	0	0.8	0.882353	0.923077	61	Condensed_aromatics.X	CHON	0.206744	0	0.142406	0	0.120572	0.0844585
1060	C13H5O7N1S1	12	0.538462	0.384615	317.971	0.0769231	13	5	1	7	1	0.75	0.866667	1.07692	46	Condensed_aromatics.X	CHONS	0.130729	0	0	0	0	0
1061	C13H5O8N1S0	12	0.615385	0.384615	301.994	0.0769231	13	5	1	8	0	0.75	0.875	1.07692	65	Condensed_aromatics.X	CHON	0.215472	0	0.170568	0	0.0871904	0.138986
1062	C13H5O8N1S1	12	0.615385	0.384615	333.966	0.0769231	13	5	1	8	1	0.666667	0.857143	1.23077	48	Condensed_aromatics.X	CHONS	0.228118	0	0.0843573	0	0	0
1063	C13H5O9N1S0	12	0.692308	0.384615	317.989	0.0769231	13	5	1	9	0	0.666667	0.866667	1.23077	59	Condensed_aromatics.X	CHON	0.117296	0	0.100717	0	0	0.0977094
1064	C13H6O10N0S0	11	0.769231	0.461538	320.989	0	13	6	0	10	0	0.333333	0.75	1.07692	67	Condensed_aromatics	CHO	0.340075	0	0.317916	0.12595	0.142121	0.17188
1065	C13H6O11N0S0	11	0.846154	0.461538	336.984	0	13	6	0	11	0	0	0.733333	1.23077	57	Condensed_aromatics	CHO	0.107509	0	0.189591	0	0	0
1066	C13H6O2N0S0	11	0.153846	0.461538	193.03	0	13	6	0	2	0	0.818182	0.833333	-0.153846	47	Condensed_aromatics	CHO	0.175824	0	0.147987	0	0	0.0801827
1067	C13H6O2N2S0	12	0.153846	0.461538	221.036	0.153846	13	6	2	2	0	0.888889	0.9	0.307692	14	Condensed_aromatics.X	CHON	0.120201	0	0	0	0	0
1068	C13H6O3N0S0	11	0.230769	0.461538	209.024	0	13	6	0	3	0	0.8	0.826087	0	62	Condensed_aromatics	CHO	0.372659	0.132934	0.307798	0	0.0879921	0.131027
1069	C13H6O3N2S0	12	0.230769	0.461538	237.031	0.153846	13	6	2	3	0	0.875	0.894737	0.461538	57	Condensed_aromatics.X	CHON	0.33717	0	0.174296	0	0.137568	0.164684
1070	C13H6O4N0S0	11	0.307692	0.461538	225.019	0	13	6	0	4	0	0.777778	0.818182	0.153846	77	Condensed_aromatics	CHO	0.795782	0.196542	0.573012	0.225859	0.264265	0.287709
1071	C13H6O4N2S0	12	0.307692	0.461538	253.025	0.153846	13	6	2	4	0	0.857143	0.888889	0.615385	64	Condensed_aromatics.X	CHON	0.352994	0	0.209061	0.124698	0.133656	0.166377
1072	C13H6O5N0S0	11	0.384615	0.461538	241.014	0	13	6	0	5	0	0.75	0.809524	0.307692	78	Condensed_aromatics	CHO	1.3759	0.464616	1.24785	0.548121	0.511213	0.493204
1073	C13H6O5N0S1	11	0.384615	0.461538	272.986	0	13	6	0	5	1	0.714286	0.789474	0.461538	49	Condensed_aromatics.X	CHOS	0.408026	0.182431	0.176021	0	0	0
1074	C13H6O5N2S0	12	0.384615	0.461538	269.02	0.153846	13	6	2	5	0	0.833333	0.882353	0.769231	66	Condensed_aromatics.X	CHON	0.333449	0.124756	0.182646	0	0.115826	0.117438
1075	C13H6O6N0S0	11	0.461538	0.461538	257.009	0	13	6	0	6	0	0.714286	0.8	0.461538	78	Condensed_aromatics	CHO	1.7498	0.59082	1.47054	0.684838	0.560533	0.6186
1076	C13H6O6N0S1	11	0.461538	0.461538	288.981	0	13	6	0	6	1	0.666667	0.777778	0.615385	62	Condensed_aromatics.X	CHOS	0.366003	0.145959	0.200945	0	0	0.0779812
1077	C13H6O6N2S0	12	0.461538	0.461538	285.015	0.153846	13	6	2	6	0	0.8	0.875	0.923077	76	Condensed_aromatics.X	CHON	0.519166	0.174724	0.197047	0.161256	0.16258	0.171626
1078	C13H6O7N0S0	11	0.538462	0.461538	273.004	0	13	6	0	7	0	0.666667	0.789474	0.615385	78	Condensed_aromatics	CHO	1.42724	0.314749	1.17913	0.559305	0.518717	0.54735
1079	C13H6O7N0S1	11	0.538462	0.461538	304.976	0	13	6	0	7	1	0.6	0.764706	0.769231	58	Condensed_aromatics.X	CHOS	0.32109	0	0.161493	0	0	0
1080	C13H6O7N2S0	12	0.538462	0.461538	301.01	0.153846	13	6	2	7	0	0.75	0.866667	1.07692	78	Condensed_aromatics.X	CHON	0.678713	0.152327	0.316105	0.139555	0.176209	0.211464
1081	C13H6O8N0S0	11	0.615385	0.461538	288.999	0	13	6	0	8	0	0.6	0.777778	0.769231	78	Condensed_aromatics	CHO	0.989864	0.296586	0.916768	0.346884	0.406931	0.340501
1082	C13H6O8N0S1	11	0.615385	0.461538	320.971	0	13	6	0	8	1	0.5	0.75	0.923077	56	Condensed_aromatics.X	CHOS	0.22234	0	0.10059	0	0	0
1083	C13H6O8N2S0	12	0.615385	0.461538	317.005	0.153846	13	6	2	8	0	0.666667	0.857143	1.23077	74	Condensed_aromatics.X	CHON	0.500877	0.128013	0.24781	0	0.146162	0.210786
1084	C13H6O9N0S0	11	0.692308	0.461538	304.994	0	13	6	0	9	0	0.5	0.764706	0.923077	78	Condensed_aromatics	CHO	0.728239	0.258197	0.739916	0.233037	0.282703	0.310697
1085	C13H6O9N0S1	11	0.692308	0.461538	336.966	0	13	6	0	9	1	0.333333	0.733333	1.07692	37	Condensed_aromatics.X	CHOS	0.0916255	0	0.0597531	0	0	0
1086	C13H6O9N2S0	12	0.692308	0.461538	333	0.153846	13	6	2	9	0	0.5	0.846154	1.38462	58	Condensed_aromatics.X	CHON	0.18903	0	0.0662929	0	0	0
1087	C13H7O10N1S0	11	0.769231	0.538462	336	0.0769231	13	7	1	10	0	0	0.714286	1.23077	60	Condensed_aromatics.X	CHON	0.158049	0	0.164965	0	0	0.112273
1088	C13H7O2N1S0	11	0.153846	0.538462	208.04	0.0769231	13	7	1	2	0	0.8	0.818182	0	30	Condensed_aromatics.X	CHON	0.282077	0	0.185991	0	0.102422	0.139409
1089	C13H7O3N1S0	11	0.230769	0.538462	224.035	0.0769231	13	7	1	3	0	0.777778	0.809524	0.153846	69	Condensed_aromatics.X	CHON	0.56538	0.199183	0.378053	0.171272	0.20664	0.256339
1090	C13H7O4N1S0	11	0.307692	0.538462	240.03	0.0769231	13	7	1	4	0	0.75	0.8	0.307692	78	Condensed_aromatics.X	CHON	1.03904	0.388742	0.743537	0.312496	0.392822	0.468819
1091	C13H7O5N1S0	11	0.384615	0.538462	256.025	0.0769231	13	7	1	5	0	0.714286	0.789474	0.461538	78	Condensed_aromatics.X	CHON	1.4315	0.547329	0.951853	0.424758	0.450959	0.538756
1092	C13H7O6N1S0	11	0.461538	0.538462	272.02	0.0769231	13	7	1	6	0	0.666667	0.777778	0.615385	78	Condensed_aromatics.X	CHON	1.25928	0.379805	0.880319	0.482516	0.400454	0.433808
1093	C13H7O6N1S1	11	0.461538	0.538462	303.992	0.0769231	13	7	1	6	1	0.6	0.75	0.769231	39	Condensed_aromatics.X	CHONS	0.359241	0	0.214323	0	0	0
1094	C13H7O7N1S0	11	0.538462	0.538462	288.015	0.0769231	13	7	1	7	0	0.6	0.764706	0.769231	78	Condensed_aromatics.X	CHON	1.07933	0.345975	0.660415	0.33136	0.338147	0.381566
1095	C13H7O7N1S1	11	0.538462	0.538462	319.987	0.0769231	13	7	1	7	1	0.5	0.733333	0.923077	48	Condensed_aromatics.X	CHONS	0.31628	0	0.157957	0	0	0
1096	C13H7O8N1S0	11	0.615385	0.538462	304.01	0.0769231	13	7	1	8	0	0.5	0.75	0.923077	78	Condensed_aromatics.X	CHON	0.811847	0.228889	0.577294	0.243303	0.26885	0.307099
1097	C13H7O8N1S1	11	0.615385	0.538462	335.982	0.0769231	13	7	1	8	1	0.333333	0.714286	1.07692	48	Condensed_aromatics.X	CHONS	0.212522	0	0.151587	0	0	0
1098	C13H7O9N1S0	11	0.692308	0.538462	320.005	0.0769231	13	7	1	9	0	0.333333	0.733333	1.07692	78	Condensed_aromatics.X	CHON	0.438341	0.131016	0.371811	0.135215	0.179223	0.268447
1099	C13H7O9N1S1	11	0.692308	0.538462	351.977	0.0769231	13	7	1	9	1	0	0.692308	1.23077	35	Condensed_aromatics.X	CHONS	0.104105	0	0.111305	0	0	0
1100	C13H8O10N0S0	10	0.769231	0.615385	323.004	0	13	8	0	10	0	0	0.625	0.923077	78	Polyphenolic_HighOC	CHO	0.971379	0.807117	1.13403	0.339372	0.367649	0.557003
1101	C13H8O10N0S1	10	0.769231	0.615385	354.977	0	13	8	0	10	1	0	0.571429	1.07692	35	Polyphenolic_HighOC	CHOS	0.12129	0	0.0937729	0	0	0
1102	C13H8O10N2S0	11	0.769231	0.615385	351.011	0.153846	13	8	2	10	0	0	0.666667	1.38462	44	Condensed_aromatics.X	CHON	0.0833963	0	0	0	0	0
1103	C13H8O11N0S0	10	0.846154	0.615385	338.999	0	13	8	0	11	0	0	0.6	1.07692	76	Polyphenolic_HighOC	CHO	0.360194	0.17675	0.341285	0.129623	0.152319	0.16426
1104	C13H8O12N0S0	10	0.923077	0.615385	354.994	0	13	8	0	12	0	0	0.571429	1.23077	36	Sugars_wo_X	CHO	0.0690255	0	0.0980121	0	0	0
1105	C13H8O2N0S0	10	0.153846	0.615385	195.045	0	13	8	0	2	0	0.727273	0.75	-0.307692	73	Condensed_aromatics	CHO	1.24824	0.699439	1.04967	0.378351	0.526477	0.565174
1106	C13H8O2N2S0	11	0.153846	0.615385	223.051	0.153846	13	8	2	2	0	0.777778	0.8	0.153846	14	Condensed_aromatics.X	CHON	0.294845	0	0	0	0	0
1107	C13H8O3N0S0	10	0.230769	0.615385	211.04	0	13	8	0	3	0	0.7	0.73913	-0.153846	76	Condensed_aromatics	CHO	2.63831	0.928762	2.21206	4.96614	1.0442	1.10918
1108	C13H8O3N2S0	11	0.230769	0.615385	239.046	0.153846	13	8	2	3	0	0.75	0.789474	0.307692	57	Condensed_aromatics.X	CHON	0.591519	0	0.403552	0	0.29274	0.328351
1109	C13H8O4N0S0	10	0.307692	0.615385	227.035	0	13	8	0	4	0	0.666667	0.727273	0	77	Condensed_aromatics	CHO	3.24783	1.37431	2.82073	2.83275	1.29359	1.4388
1110	C13H8O4N2S0	11	0.307692	0.615385	255.041	0.153846	13	8	2	4	0	0.714286	0.777778	0.461538	76	Condensed_aromatics.X	CHON	1.0285	0.31048	0.611889	0.312329	0.368836	0.457685
1111	C13H8O5N0S0	10	0.384615	0.615385	243.03	0	13	8	0	5	0	0.625	0.714286	0.153846	78	Condensed_aromatics	CHO	4.09725	1.64333	3.68275	2.16744	1.45652	1.55493
1112	C13H8O5N0S1	10	0.384615	0.615385	275.002	0	13	8	0	5	1	0.571429	0.684211	0.307692	51	Condensed_aromatics.X	CHOS	0.466811	0.215393	0.287241	0	0	0
1113	C13H8O5N2S0	11	0.384615	0.615385	271.036	0.153846	13	8	2	5	0	0.666667	0.764706	0.615385	78	Condensed_aromatics.X	CHON	1.06952	0.271005	0.643586	0.425843	0.376211	0.477328
1114	C13H8O6N0S0	10	0.461538	0.615385	259.025	0	13	8	0	6	0	0.571429	0.7	0.307692	78	Condensed_aromatics	CHO	3.67587	1.63247	3.28205	1.71856	1.32456	1.40421
1115	C13H8O6N0S1	10	0.461538	0.615385	290.997	0	13	8	0	6	1	0.5	0.666667	0.461538	67	Condensed_aromatics.X	CHOS	0.464526	0.293981	0.30211	0	0	0.117903
1116	C13H8O6N2S0	11	0.461538	0.615385	287.031	0.153846	13	8	2	6	0	0.6	0.75	0.769231	78	Condensed_aromatics.X	CHON	1.11212	0.313157	0.626907	0.431185	0.44724	0.469877
1117	C13H8O7N0S0	10	0.538462	0.615385	275.02	0	13	8	0	7	0	0.5	0.684211	0.461538	78	Condensed_aromatics	CHO	3.16322	1.73338	2.89614	1.34397	1.17221	1.1292
1118	C13H8O7N0S1	10	0.538462	0.615385	306.992	0	13	8	0	7	1	0.4	0.647059	0.615385	74	Polyphenolic_HighOC	CHOS	0.537727	0.325532	0.329206	0	0.121181	0.108251
1119	C13H8O7N2S0	11	0.538462	0.615385	303.026	0.153846	13	8	2	7	0	0.5	0.733333	0.923077	78	Condensed_aromatics.X	CHON	0.862221	0.223751	0.508487	0.304734	0.299539	0.321281
1120	C13H8O8N0S0	10	0.615385	0.615385	291.015	0	13	8	0	8	0	0.4	0.666667	0.615385	78	Condensed_aromatics	CHO	3.01357	1.36299	2.60106	0.939743	1.06075	1.09834
1121	C13H8O8N0S1	10	0.615385	0.615385	322.987	0	13	8	0	8	1	0.25	0.625	0.769231	74	Polyphenolic_HighOC	CHOS	0.443106	0.222376	0.309161	0.1257	0.120348	0.117988
1122	C13H8O8N2S0	11	0.615385	0.615385	319.021	0.153846	13	8	2	8	0	0.333333	0.714286	1.07692	78	Condensed_aromatics.X	CHON	0.723308	0.201463	0.463773	0.223856	0.271031	0.30422
1123	C13H8O9N0S0	10	0.692308	0.615385	307.01	0	13	8	0	9	0	0.25	0.647059	0.769231	78	Polyphenolic_HighOC	CHO	1.85266	0.896668	1.67511	0.535935	0.719329	0.76254
1124	C13H8O9N0S1	10	0.692308	0.615385	338.982	0	13	8	0	9	1	0	0.6	0.923077	67	Polyphenolic_HighOC	CHOS	0.2866	0.200269	0.200583	0	0.0875431	0.109055
1125	C13H8O9N2S0	11	0.692308	0.615385	335.016	0.153846	13	8	2	9	0	0	0.692308	1.23077	65	Condensed_aromatics.X	CHON	0.334856	0	0.276142	0.147067	0.164568	0.184369
1126	C13H9O10N1S0	10	0.769231	0.692308	338.015	0.0769231	13	9	1	10	0	0	0.571429	1.07692	76	Polyphenolic_HighOC	CHON	0.256497	0.178885	0.27103	0.124364	0.145328	0.168409
1127	C13H9O10N1S1	10	0.769231	0.692308	369.987	0.0769231	13	9	1	10	1	0	0.5	1.23077	18	Highly_Unsaturated_and_Phenolic_HighOC	CHONS	0.0841376	0	0.0724706	0	0	0
1128	C13H9O11N1S0	10	0.846154	0.692308	354.01	0.0769231	13	9	1	11	0	0	0.538462	1.23077	40	Polyphenolic_HighOC	CHON	0.0807188	0	0.0782009	0	0.0880241	0
1129	C13H9O2N1S0	10	0.153846	0.692308	210.056	0.0769231	13	9	1	2	0	0.7	0.727273	-0.153846	31	Condensed_aromatics.X	CHON	0.714322	0	0.585175	0	0.306914	0.425637
1130	C13H9O3N1S0	10	0.230769	0.692308	226.051	0.0769231	13	9	1	3	0	0.666667	0.714286	0	69	Condensed_aromatics.X	CHON	1.19499	0.528225	0.917726	0.545617	0.576919	0.708859
1131	C13H9O4N1S0	10	0.307692	0.692308	242.046	0.0769231	13	9	1	4	0	0.625	0.7	0.153846	78	Condensed_aromatics.X	CHON	1.79291	0.783237	1.43054	0.727906	0.721605	0.905844
1132	C13H9O5N1S0	10	0.384615	0.692308	258.041	0.0769231	13	9	1	5	0	0.571429	0.684211	0.307692	78	Condensed_aromatics.X	CHON	1.95011	0.98915	1.52787	0.829484	0.742096	0.904235
1133	C13H9O6N1S0	10	0.461538	0.692308	274.036	0.0769231	13	9	1	6	0	0.5	0.666667	0.461538	78	Condensed_aromatics.X	CHON	1.91821	0.86396	1.53413	0.761376	0.686845	0.760042
1134	C13H9O6N1S1	10	0.461538	0.692308	306.008	0.0769231	13	9	1	6	1	0.4	0.625	0.615385	39	Polyphenolic_LowOC	CHONS	0.408253	0	0.292162	0	0	0
1135	C13H9O7N1S0	10	0.538462	0.692308	290.031	0.0769231	13	9	1	7	0	0.4	0.647059	0.615385	78	Polyphenolic_HighOC	CHON	1.9725	0.900142	1.55024	0.729659	0.756719	0.790185
1136	C13H9O7N1S1	10	0.538462	0.692308	322.003	0.0769231	13	9	1	7	1	0.25	0.6	0.769231	48	Polyphenolic_HighOC	CHONS	0.378483	0	0.29295	0	0	0
1137	C13H9O8N1S0	10	0.615385	0.692308	306.026	0.0769231	13	9	1	8	0	0.25	0.625	0.769231	78	Polyphenolic_HighOC	CHON	1.45025	0.537596	1.18309	0.506137	0.551714	0.577366
1138	C13H9O8N1S1	10	0.615385	0.692308	337.998	0.0769231	13	9	1	8	1	0	0.571429	0.923077	48	Polyphenolic_HighOC	CHONS	0.29967	0	0.200157	0	0	0
1139	C13H9O9N1S0	10	0.692308	0.692308	322.02	0.0769231	13	9	1	9	0	0	0.6	0.923077	78	Polyphenolic_HighOC	CHON	0.758826	0.407231	0.718081	0.283367	0.302906	0.37873
1140	C13H9O9N1S1	10	0.692308	0.692308	353.993	0.0769231	13	9	1	9	1	0	0.538462	1.07692	43	Polyphenolic_HighOC	CHONS	0.190255	0	0.140127	0	0	0
1141	C14H10O10N0S0	10	0.714286	0.714286	337.02	0	14	10	0	10	0	0	0.555556	0.714286	78	Polyphenolic_HighOC	CHO	3.05039	2.79204	3.8413	1.1722	1.52434	1.67567
1142	C14H10O10N0S1	10	0.714286	0.714286	368.992	0	14	10	0	10	1	0	0.5	0.857143	57	Highly_Unsaturated_and_Phenolic_HighOC	CHOS	0.38939	0.221978	0.324136	0	0.161137	0.134033
1143	C14H10O10N2S0	11	0.714286	0.714286	365.026	0.142857	14	10	2	10	0	0	0.571429	1.14286	66	Polyphenolic_HighOC	CHON	0.243563	0	0.240802	0.163176	0.171687	0.156344
1144	C14H10O11N0S0	10	0.785714	0.714286	353.015	0	14	10	0	11	0	0	0.529412	0.857143	78	Polyphenolic_HighOC	CHO	1.48865	0.738588	1.94576	0.650867	0.843717	0.91084
1145	C14H10O11N0S1	10	0.785714	0.714286	384.987	0	14	10	0	11	1	0	0.466667	1	26	Highly_Unsaturated_and_Phenolic_HighOC	CHOS	0.157898	0	0.130796	0	0	0
1146	C14H10O11N2S0	11	0.785714	0.714286	381.021	0.142857	14	10	2	11	0	0	0.538462	1.28571	20	Polyphenolic_HighOC	CHON	0.0658488	0	0.0631401	0	0	0
1147	C14H10O12N0S0	10	0.857143	0.714286	369.01	0	14	10	0	12	0	0	0.5	1	73	Highly_Unsaturated_and_Phenolic_HighOC	CHO	0.398693	0	0.609524	0.300477	0.319773	0.254434
1148	C14H10O13N0S0	10	0.928571	0.714286	385.005	0	14	10	0	13	0	0	0.466667	1.14286	29	Sugars_wo_X	CHO	0.125783	0	0.189442	0	0.11278	0.100461
1149	C14H10O14N0S0	10	1	0.714286	401	0	14	10	0	14	0	0	0.428571	1.28571	4	Sugars_wo_X	CHO	0	0	0.0791595	0	0	0
1150	C14H10O2N0S0	10	0.142857	0.714286	209.061	0	14	10	0	2	0	0.666667	0.692308	-0.428571	76	Condensed_aromatics	CHO	1.80129	1.06571	1.59491	0.731746	0.959415	1.0958
1151	C14H10O2N2S0	11	0.142857	0.714286	237.067	0.142857	14	10	2	2	0	0.7	0.727273	0	14	Condensed_aromatics.X	CHON	0.45244	0	0	0	0	0
1152	C14H10O3N0S0	10	0.214286	0.714286	225.056	0	14	10	0	3	0	0.636364	0.68	-0.285714	77	Condensed_aromatics	CHO	3.2908	1.89617	2.9609	1.58118	1.75644	1.96409
1153	C14H10O3N2S0	11	0.214286	0.714286	253.062	0.142857	14	10	2	3	0	0.666667	0.714286	0.142857	57	Condensed_aromatics.X	CHON	0.86514	0	0.669426	0	0.472284	0.6117
1154	C14H10O4N0S0	10	0.285714	0.714286	241.051	0	14	10	0	4	0	0.6	0.666667	-0.142857	78	Condensed_aromatics	CHO	4.80111	2.54991	4.49173	2.31902	2.19025	2.44032
1155	C14H10O4N2S0	11	0.285714	0.714286	269.057	0.142857	14	10	2	4	0	0.625	0.7	0.285714	76	Condensed_aromatics.X	CHON	1.19024	0.493092	0.764967	0.595028	0.662762	0.728672
1156	C14H10O5N0S0	10	0.357143	0.714286	257.046	0	14	10	0	5	0	0.555556	0.652174	0	78	Polyphenolic_LowOC	CHO	5.74807	2.85232	5.31536	2.86755	2.27519	2.53879
1157	C14H10O5N0S1	10	0.357143	0.714286	289.018	0	14	10	0	5	1	0.5	0.619048	0.142857	51	Polyphenolic_LowOC	CHOS	0.549148	0.339679	0.402018	0	0	0
1158	C14H10O5N2S0	11	0.357143	0.714286	285.052	0.142857	14	10	2	5	0	0.571429	0.684211	0.428571	78	Condensed_aromatics.X	CHON	1.40145	0.444825	0.944375	0.804695	0.801805	0.871468
1159	C14H10O6N0S0	10	0.428571	0.714286	273.04	0	14	10	0	6	0	0.5	0.636364	0.142857	78	Polyphenolic_LowOC	CHO	5.86024	3.33456	5.41802	2.9067	2.28177	2.26844
1160	C14H10O6N0S1	10	0.428571	0.714286	305.013	0	14	10	0	6	1	0.428571	0.6	0.285714	67	Polyphenolic_LowOC	CHOS	0.726802	0.405675	0.447605	0	0	0.173955
1161	C14H10O6N2S0	11	0.428571	0.714286	301.047	0.142857	14	10	2	6	0	0.5	0.666667	0.571429	78	Condensed_aromatics.X	CHON	1.54496	0.413599	1.02322	0.745768	0.736677	0.768297
1162	C14H10O7N0S0	10	0.5	0.714286	289.035	0	14	10	0	7	0	0.428571	0.619048	0.285714	78	Polyphenolic_HighOC	CHO	6.58636	3.50139	6.13071	2.56691	2.44999	2.37483
1163	C14H10O7N0S1	10	0.5	0.714286	321.007	0	14	10	0	7	1	0.333333	0.578947	0.428571	75	Polyphenolic_HighOC	CHOS	0.771624	0.48922	0.485906	0.162091	0.239285	0.195419
1164	C14H10O7N2S0	11	0.5	0.714286	317.042	0.142857	14	10	2	7	0	0.4	0.647059	0.714286	78	Polyphenolic_HighOC	CHON	1.55434	0.498085	1.03336	0.820553	0.752614	0.788533
1165	C14H10O8N0S0	10	0.571429	0.714286	305.03	0	14	10	0	8	0	0.333333	0.6	0.428571	78	Polyphenolic_HighOC	CHO	6.94881	3.52878	6.13616	2.07446	2.18762	2.15088
1166	C14H10O8N0S1	10	0.571429	0.714286	337.002	0	14	10	0	8	1	0.2	0.555556	0.571429	75	Polyphenolic_HighOC	CHOS	0.690361	0.5749	0.501457	0.174193	0.230947	0.233859
1167	C14H10O8N2S0	11	0.571429	0.714286	333.036	0.142857	14	10	2	8	0	0.25	0.625	0.857143	78	Polyphenolic_HighOC	CHON	1.46348	0.40582	1.09839	0.672234	0.682323	0.687522
1168	C14H10O9N0S0	10	0.642857	0.714286	321.025	0	14	10	0	9	0	0.2	0.578947	0.571429	78	Polyphenolic_HighOC	CHO	5.12685	3.27844	5.27689	1.53177	1.89292	1.91232
1169	C14H10O9N0S1	10	0.642857	0.714286	352.997	0	14	10	0	9	1	0	0.529412	0.714286	72	Polyphenolic_HighOC	CHOS	0.639382	0.442147	0.476725	0.178116	0.278438	0.205791
1170	C14H10O9N2S0	11	0.642857	0.714286	349.031	0.142857	14	10	2	9	0	0	0.6	1	78	Polyphenolic_HighOC	CHON	0.834962	0.213403	0.682996	0.417914	0.42351	0.4935
1171	C14H11O10N1S0	10	0.714286	0.785714	352.031	0.0714286	14	11	1	10	0	0	0.5	0.857143	78	Highly_Unsaturated_and_Phenolic_HighOC	CHON	0.99472	0.525511	1.11469	0.557636	0.681778	0.807457
1172	C14H11O10N1S1	10	0.714286	0.785714	384.003	0.0714286	14	11	1	10	1	0	0.428571	1	32	Highly_Unsaturated_and_Phenolic_HighOC	CHONS	0.140244	0	0.147796	0	0	0
1173	C14H11O11N1S0	10	0.785714	0.785714	368.026	0.0714286	14	11	1	11	0	0	0.466667	1	73	Highly_Unsaturated_and_Phenolic_HighOC	CHON	0.284044	0.140351	0.380055	0.208915	0.247141	0.319418
1174	C14H11O12N1S0	10	0.857143	0.785714	384.021	0.0714286	14	11	1	12	0	0	0.428571	1.14286	13	Highly_Unsaturated_and_Phenolic_HighOC	CHON	0	0	0.107343	0	0.110535	0.0910628
1175	C14H11O2N1S0	10	0.142857	0.785714	224.072	0.0714286	14	11	1	2	0	0.636364	0.666667	-0.285714	32	Condensed_aromatics.X	CHON	0.721069	0	0.628483	0	0.446951	0.607593
1176	C14H11O3N1S0	10	0.214286	0.785714	240.067	0.0714286	14	11	1	3	0	0.6	0.652174	-0.142857	70	Polyphenolic_LowOC	CHON	1.2992	0.858424	1.15876	0.688677	0.733118	0.971506
1177	C14H11O4N1S0	10	0.285714	0.785714	256.062	0.0714286	14	11	1	4	0	0.555556	0.636364	0	78	Polyphenolic_LowOC	CHON	1.95766	1.12411	1.68088	1.03164	0.924398	1.15503
1178	C14H11O5N1S0	10	0.357143	0.785714	272.056	0.0714286	14	11	1	5	0	0.5	0.619048	0.142857	78	Polyphenolic_LowOC	CHON	2.13702	1.16941	1.82299	1.1984	1.07069	1.22945
1179	C14H11O6N1S0	10	0.428571	0.785714	288.051	0.0714286	14	11	1	6	0	0.428571	0.6	0.285714	78	Polyphenolic_LowOC	CHON	2.63454	1.25809	2.27381	1.45656	1.27884	1.30828
1180	C14H11O6N1S1	10	0.428571	0.785714	320.023	0.0714286	14	11	1	6	1	0.333333	0.555556	0.428571	39	Polyphenolic_LowOC	CHONS	0.463891	0	0.33204	0	0	0
1181	C14H11O7N1S0	10	0.5	0.785714	304.046	0.0714286	14	11	1	7	0	0.333333	0.578947	0.428571	78	Polyphenolic_HighOC	CHON	3.02275	1.50601	2.46134	1.27411	1.24314	1.3054
1182	C14H11O7N1S1	10	0.5	0.785714	336.018	0.0714286	14	11	1	7	1	0.2	0.529412	0.571429	48	Polyphenolic_HighOC	CHONS	0.484888	0	0.344139	0	0	0
1183	C14H11O8N1S0	10	0.571429	0.785714	320.041	0.0714286	14	11	1	8	0	0.2	0.555556	0.571429	78	Polyphenolic_HighOC	CHON	2.87413	1.54614	2.48765	1.16043	1.18735	1.31535
1184	C14H11O8N1S1	10	0.571429	0.785714	352.013	0.0714286	14	11	1	8	1	0	0.5	0.714286	48	Highly_Unsaturated_and_Phenolic_HighOC	CHONS	0.472377	0	0.349699	0	0	0
1185	C14H11O9N1S0	10	0.642857	0.785714	336.036	0.0714286	14	11	1	9	0	0	0.529412	0.714286	78	Polyphenolic_HighOC	CHON	2.08704	1.458	2.02074	1.02371	1.10942	1.27225
1186	C14H11O9N1S1	10	0.642857	0.785714	368.008	0.0714286	14	11	1	9	1	0	0.466667	0.857143	43	Highly_Unsaturated_and_Phenolic_HighOC	CHONS	0.336384	0	0.282725	0	0	0
1187	C14H12O10N0S0	9	0.714286	0.857143	339.036	0	14	12	0	10	0	0	0.444444	0.571429	78	Highly_Unsaturated_and_Phenolic_HighOC	CHO	6.31988	4.26871	7.97777	3.2838	3.53427	3.96561
1188	C14H12O10N0S1	9	0.714286	0.857143	371.008	0	14	12	0	10	1	0	0.375	0.714286	61	Highly_Unsaturated_and_Phenolic_HighOC	CHOS	0.634299	0.480934	0.600662	0	0.30297	0.287032
1189	C14H12O10N2S0	10	0.714286	0.857143	367.042	0.142857	14	12	2	10	0	0	0.428571	1	77	Highly_Unsaturated_and_Phenolic_HighOC	CHON	0.426512	0.199147	0.446114	0.344631	0.35572	0.507386
1190	C14H12O11N0S0	9	0.785714	0.857143	355.031	0	14	12	0	11	0	0	0.411765	0.714286	78	Highly_Unsaturated_and_Phenolic_HighOC	CHO	3.2452	1.47019	4.69864	1.93799	2.30793	2.53409
1191	C14H12O11N0S1	9	0.785714	0.857143	387.003	0	14	12	0	11	1	0	0.333333	0.857143	46	Highly_Unsaturated_and_Phenolic_HighOC	CHOS	0.284044	0.148745	0.251943	0	0.154916	0.160704
1192	C14H12O11N2S0	10	0.785714	0.857143	383.037	0.142857	14	12	2	11	0	0	0.384615	1.14286	40	Highly_Unsaturated_and_Phenolic_HighOC	CHON	0.13017	0	0.123383	0.141057	0.0924173	0.119766
1193	C14H12O12N0S0	9	0.857143	0.857143	371.026	0	14	12	0	12	0	0	0.375	0.857143	78	Highly_Unsaturated_and_Phenolic_HighOC	CHO	1.17118	0.559522	2.05263	0.950677	0.962333	1.01329
1194	C14H12O12N0S1	9	0.857143	0.857143	402.998	0	14	12	0	12	1	0	0.285714	1	13	Highly_Unsaturated_and_Phenolic_HighOC	CHOS	0.0799019	0	0.0746434	0	0	0.08086
1195	C14H12O13N0S0	9	0.928571	0.857143	387.021	0	14	12	0	13	0	0	0.333333	1	68	Sugars_wo_X	CHO	0.279233	0	0.530748	0.242719	0.253202	0.243046
1196	C14H12O14N0S0	9	1	0.857143	403.015	0	14	12	0	14	0	0	0.285714	1.14286	16	Sugars_wo_X	CHO	0.105074	0	0.145026	0	0	0
1197	C14H12O2N0S0	9	0.142857	0.857143	211.076	0	14	12	0	2	0	0.583333	0.615385	-0.571429	76	Polyphenolic_LowOC	CHO	1.63876	1.20762	1.56591	1.0626	1.13424	1.37809
1198	C14H12O2N2S0	10	0.142857	0.857143	239.083	0.142857	14	12	2	2	0	0.6	0.636364	-0.142857	14	Polyphenolic_LowOC	CHON	0.419387	0	0	0	0	0
1199	C14H12O3N0S0	9	0.214286	0.857143	227.071	0	14	12	0	3	0	0.545455	0.6	-0.428571	77	Polyphenolic_LowOC	CHO	2.64531	2.10461	2.68384	2.09641	1.88772	2.30421
1200	C14H12O3N2S0	10	0.214286	0.857143	255.078	0.142857	14	12	2	3	0	0.555556	0.619048	0	57	Polyphenolic_LowOC	CHON	0.833615	0	0.730819	0	0.568036	0.789041
1201	C14H12O4N0S0	9	0.285714	0.857143	243.066	0	14	12	0	4	0	0.5	0.583333	-0.285714	78	Polyphenolic_LowOC	CHO	4.40085	3.20217	4.57864	3.1591	2.5906	3.20714
1202	C14H12O4N2S0	10	0.285714	0.857143	271.072	0.142857	14	12	2	4	0	0.5	0.6	0.142857	76	Polyphenolic_LowOC	CHON	1.08429	0.578554	0.936217	0.869631	0.774067	0.966849
1203	C14H12O5N0S0	9	0.357143	0.857143	259.061	0	14	12	0	5	0	0.444444	0.565217	-0.142857	78	Polyphenolic_LowOC	CHO	5.29682	4.33547	5.50338	4.07823	2.92692	3.50369
1204	C14H12O5N0S1	9	0.357143	0.857143	291.033	0	14	12	0	5	1	0.375	0.52381	0	51	Polyphenolic_LowOC	CHOS	0.466901	0.448986	0.367316	0	0	0
1205	C14H12O5N2S0	10	0.357143	0.857143	287.067	0.142857	14	12	2	5	0	0.428571	0.578947	0.285714	78	Polyphenolic_LowOC	CHON	1.45153	0.648603	1.19427	1.18897	1.03901	1.19097
1206	C14H12O6N0S0	9	0.428571	0.857143	275.056	0	14	12	0	6	0	0.375	0.545455	0	78	Polyphenolic_LowOC	CHO	6.0578	4.51544	6.40323	4.02122	2.99183	3.37385
1207	C14H12O6N0S1	9	0.428571	0.857143	307.028	0	14	12	0	6	1	0.285714	0.5	0.142857	67	Highly_Unsaturated_and_Phenolic_LowOC	CHOS	0.648216	0.561331	0.450608	0	0	0.234875
1208	C14H12O6N2S0	10	0.428571	0.857143	303.062	0.142857	14	12	2	6	0	0.333333	0.555556	0.428571	78	Polyphenolic_LowOC	CHON	1.85585	0.696762	1.48486	1.32853	1.1269	1.2952
1209	C14H12O7N0S0	9	0.5	0.857143	291.051	0	14	12	0	7	0	0.285714	0.52381	0.142857	78	Polyphenolic_HighOC	CHO	7.56976	6.28663	7.93067	3.94343	3.54697	3.80669
1210	C14H12O7N0S1	9	0.5	0.857143	323.023	0	14	12	0	7	1	0.166667	0.473684	0.285714	75	Highly_Unsaturated_and_Phenolic_HighOC	CHOS	0.848833	0.839899	0.597914	0.293049	0.354726	0.316667
1211	C14H12O7N2S0	10	0.5	0.857143	319.057	0.142857	14	12	2	7	0	0.2	0.529412	0.571429	78	Polyphenolic_HighOC	CHON	1.97457	0.871992	1.6249	1.38445	1.26344	1.38571
1212	C14H12O8N0S0	9	0.571429	0.857143	307.046	0	14	12	0	8	0	0.166667	0.5	0.285714	78	Highly_Unsaturated_and_Phenolic_HighOC	CHO	8.60362	9.57636	9.08436	3.44405	3.66026	3.83412
1213	C14H12O8N0S1	9	0.571429	0.857143	339.018	0	14	12	0	8	1	0	0.444444	0.428571	75	Highly_Unsaturated_and_Phenolic_HighOC	CHOS	0.930399	0.948156	0.695394	0.298057	0.37387	0.344692
1214	C14H12O8N2S0	10	0.571429	0.857143	335.052	0.142857	14	12	2	8	0	0	0.5	0.714286	78	Highly_Unsaturated_and_Phenolic_HighOC	CHON	1.81174	0.846628	1.60711	1.40598	1.29689	1.47889
1215	C14H12O9N0S0	9	0.642857	0.857143	323.041	0	14	12	0	9	0	0	0.473684	0.428571	78	Highly_Unsaturated_and_Phenolic_HighOC	CHO	9.14023	8.69043	10.4358	3.52744	4.14784	4.35721
1216	C14H12O9N0S1	9	0.642857	0.857143	355.013	0	14	12	0	9	1	0	0.411765	0.571429	72	Highly_Unsaturated_and_Phenolic_HighOC	CHOS	0.950216	0.742387	0.726793	0.310827	0.366302	0.366199
1217	C14H12O9N2S0	10	0.642857	0.857143	351.047	0.142857	14	12	2	9	0	0	0.466667	0.857143	78	Highly_Unsaturated_and_Phenolic_HighOC	CHON	1.12704	0.526452	1.06763	0.88332	0.936872	1.09195
1218	C14H13O10N1S0	9	0.714286	0.928571	354.047	0.0714286	14	13	1	10	0	0	0.375	0.714286	78	Highly_Unsaturated_and_Phenolic_HighOC	CHON	1.53006	1.0558	1.885	1.32769	1.49102	1.88209
1219	C14H13O10N1S1	9	0.714286	0.928571	386.019	0.0714286	14	13	1	10	1	0	0.285714	0.857143	34	Highly_Unsaturated_and_Phenolic_HighOC	CHONS	0.182737	0	0.196748	0	0	0
1220	C14H13O11N1S0	9	0.785714	0.928571	370.042	0.0714286	14	13	1	11	0	0	0.333333	0.857143	78	Highly_Unsaturated_and_Phenolic_HighOC	CHON	0.489774	0.301507	0.758917	0.55171	0.551746	0.703271
1221	C14H13O11N1S1	9	0.785714	0.928571	402.014	0.0714286	14	13	1	11	1	0	0.230769	1	18	Highly_Unsaturated_and_Phenolic_HighOC	CHONS	0.0768614	0	0.0785204	0	0	0
1222	C14H13O12N1S0	9	0.857143	0.928571	386.036	0.0714286	14	13	1	12	0	0	0.285714	1	21	Highly_Unsaturated_and_Phenolic_HighOC	CHON	0.104272	0	0.144217	0	0.156904	0.203632
1223	C14H13O13N1S0	9	0.928571	0.928571	402.031	0.0714286	14	13	1	13	0	0	0.230769	1.14286	1	Sugars_w_X	CHON	0	0	0.0655473	0	0	0
1224	C14H13O2N1S0	9	0.142857	0.928571	226.087	0.0714286	14	13	1	2	0	0.545455	0.583333	-0.428571	32	Polyphenolic_LowOC	CHON	0.428115	0	0.420679	0	0.375441	0.545742
1225	C14H13O3N1S0	9	0.214286	0.928571	242.082	0.0714286	14	13	1	3	0	0.5	0.565217	-0.285714	70	Polyphenolic_LowOC	CHON	1.04642	0.873801	1.00764	0.736837	0.764191	1.04547
1226	C14H13O4N1S0	9	0.285714	0.928571	258.077	0.0714286	14	13	1	4	0	0.444444	0.545455	-0.142857	78	Polyphenolic_LowOC	CHON	1.5732	1.30502	1.48573	1.59361	1.06947	1.41018
1227	C14H13O5N1S0	9	0.357143	0.928571	274.072	0.0714286	14	13	1	5	0	0.375	0.52381	0	78	Polyphenolic_LowOC	CHON	1.93323	1.66475	1.88982	1.62299	1.26081	1.48846
1228	C14H13O6N1S0	9	0.428571	0.928571	290.067	0.0714286	14	13	1	6	0	0.285714	0.5	0.142857	78	Highly_Unsaturated_and_Phenolic_LowOC	CHON	2.491	1.95681	2.40442	1.98866	1.58293	1.81554
1229	C14H13O6N1S1	9	0.428571	0.928571	322.039	0.0714286	14	13	1	6	1	0.166667	0.444444	0.285714	39	Highly_Unsaturated_and_Phenolic_LowOC	CHONS	0.396439	0	0.294995	0	0	0
1230	C14H13O7N1S0	9	0.5	0.928571	306.062	0.0714286	14	13	1	7	0	0.166667	0.473684	0.285714	78	Highly_Unsaturated_and_Phenolic_HighOC	CHON	3.15298	3.03942	3.04606	2.1071	1.80769	2.10583
1231	C14H13O7N1S1	9	0.5	0.928571	338.034	0.0714286	14	13	1	7	1	0	0.411765	0.428571	48	Highly_Unsaturated_and_Phenolic_HighOC	CHONS	0.443379	0	0.337898	0	0	0
1232	C14H13O8N1S0	9	0.571429	0.928571	322.057	0.0714286	14	13	1	8	0	0	0.444444	0.428571	78	Highly_Unsaturated_and_Phenolic_HighOC	CHON	3.5774	3.05215	3.46091	2.1752	2.12678	2.50162
1233	C14H13O8N1S1	9	0.571429	0.928571	354.029	0.0714286	14	13	1	8	1	0	0.375	0.571429	48	Highly_Unsaturated_and_Phenolic_HighOC	CHONS	0.495689	0	0.392794	0	0	0
1234	C14H13O9N1S0	9	0.642857	0.928571	338.052	0.0714286	14	13	1	9	0	0	0.411765	0.571429	78	Highly_Unsaturated_and_Phenolic_HighOC	CHON	2.6097	2.34088	2.7793	2.27503	2.15683	2.6818
1235	C14H13O9N1S1	9	0.642857	0.928571	370.024	0.0714286	14	13	1	9	1	0	0.333333	0.714286	43	Highly_Unsaturated_and_Phenolic_HighOC	CHONS	0.407588	0	0.339581	0	0	0
1236	C14H14O10N0S0	8	0.714286	1	341.051	0	14	14	0	10	0	0	0.333333	0.428571	78	Highly_Unsaturated_and_Phenolic_HighOC	CHO	9.73297	9.59253	13.4431	6.36912	6.98203	8.57548
1237	C14H14O10N0S1	8	0.714286	1	373.023	0	14	14	0	10	1	0	0.25	0.571429	61	Highly_Unsaturated_and_Phenolic_HighOC	CHOS	0.685308	0.892978	0.694073	0	0.411004	0.506836
1238	C14H14O10N2S0	9	0.714286	1	369.058	0.142857	14	14	2	10	0	0	0.285714	0.857143	78	Highly_Unsaturated_and_Phenolic_HighOC	CHON	0.566786	0.386861	0.673644	0.603292	0.60238	0.815628
1239	C14H14O11N0S0	8	0.785714	1	357.046	0	14	14	0	11	0	0	0.294118	0.571429	78	Highly_Unsaturated_and_Phenolic_HighOC	CHO	5.33717	4.00092	8.97129	3.41058	4.10799	5.26102
1240	C14H14O11N0S1	8	0.785714	1	389.018	0	14	14	0	11	1	0	0.2	0.714286	51	Highly_Unsaturated_and_Phenolic_HighOC	CHOS	0.300079	0.279689	0.268899	0	0.166685	0.260361
1241	C14H14O11N2S0	9	0.785714	1	385.052	0.142857	14	14	2	11	0	0	0.230769	1	51	Highly_Unsaturated_and_Phenolic_HighOC	CHON	0.157323	0	0.186843	0.122111	0.218569	0.232589
1242	C14H14O12N0S0	8	0.857143	1	373.041	0	14	14	0	12	0	0	0.25	0.714286	78	Highly_Unsaturated_and_Phenolic_HighOC	CHO	1.68541	1.11709	3.1013	1.26785	1.34707	1.70475
1243	C14H14O12N0S1	8	0.857143	1	405.013	0	14	14	0	12	1	0	0.142857	0.857143	23	Highly_Unsaturated_and_Phenolic_HighOC	CHOS	0.0887816	0	0.105958	0	0	0.109944
1244	C14H14O12N2S0	9	0.857143	1	401.047	0.142857	14	14	2	12	0	0	0.166667	1.14286	3	Highly_Unsaturated_and_Phenolic_HighOC	CHON	0.065637	0	0	0	0	0
1245	C14H14O13N0S0	8	0.928571	1	389.036	0	14	14	0	13	0	0	0.2	0.857143	74	Sugars_wo_X	CHO	0.292802	0.224728	0.4809	0.29597	0.222898	0.203843
1246	C14H14O14N0S0	8	1	1	405.031	0	14	14	0	14	0	0	0.142857	1	7	Sugars_wo_X	CHO	0.070871	0	0.0998654	0	0	0
1247	C14H14O2N0S0	8	0.142857	1	213.092	0	14	14	0	2	0	0.5	0.538462	-0.714286	76	Polyphenolic_LowOC	CHO	1.29017	1.10707	1.39334	1.60029	1.40733	1.8169
1248	C14H14O2N2S0	9	0.142857	1	241.098	0.142857	14	14	2	2	0	0.5	0.545455	-0.285714	14	Polyphenolic_LowOC	CHON	0.377439	0	0	0	0	0
1249	C14H14O3N0S0	8	0.214286	1	229.087	0	14	14	0	3	0	0.454545	0.52	-0.571429	77	Polyphenolic_LowOC	CHO	2.27575	2.29352	2.44687	2.8931	2.19358	2.93162
1250	C14H14O3N2S0	9	0.214286	1	257.093	0.142857	14	14	2	3	0	0.444444	0.52381	-0.142857	57	Polyphenolic_LowOC	CHON	0.776359	0	0.647783	0	0.578009	0.820454
1251	C14H14O4N0S0	8	0.285714	1	245.082	0	14	14	0	4	0	0.4	0.5	-0.428571	78	Highly_Unsaturated_and_Phenolic_LowOC	CHO	3.39614	3.88843	3.80204	4.22329	2.93189	3.93666
1252	C14H14O4N2S0	9	0.285714	1	273.088	0.142857	14	14	2	4	0	0.375	0.5	0	76	Highly_Unsaturated_and_Phenolic_LowOC	CHON	1.01957	0.700307	0.903518	1.16243	0.893228	1.10008
1253	C14H14O5N0S0	8	0.357143	1	261.077	0	14	14	0	5	0	0.333333	0.478261	-0.285714	78	Highly_Unsaturated_and_Phenolic_LowOC	CHO	3.84975	5.89528	4.4753	5.10795	3.38991	4.17627
1254	C14H14O5N0S1	8	0.357143	1	293.049	0	14	14	0	5	1	0.25	0.428571	-0.142857	51	Highly_Unsaturated_and_Phenolic_LowOC	CHOS	0.308323	0.451012	0.291395	0	0	0
1255	C14H14O5N2S0	9	0.357143	1	289.083	0.142857	14	14	2	5	0	0.285714	0.473684	0.142857	78	Highly_Unsaturated_and_Phenolic_LowOC	CHON	1.45539	1.02548	1.29797	1.60872	1.23872	1.5371
1256	C14H14O6N0S0	8	0.428571	1	277.072	0	14	14	0	6	0	0.25	0.454545	-0.142857	78	Highly_Unsaturated_and_Phenolic_LowOC	CHO	5.28041	7.16882	6.06433	5.45809	3.88996	4.62562
1257	C14H14O6N0S1	8	0.428571	1	309.044	0	14	14	0	6	1	0.142857	0.4	0	67	Highly_Unsaturated_and_Phenolic_LowOC	CHOS	0.499531	0.716987	0.410432	0	0	0.276109
1258	C14H14O6N2S0	9	0.428571	1	305.078	0.142857	14	14	2	6	0	0.166667	0.444444	0.285714	78	Highly_Unsaturated_and_Phenolic_LowOC	CHON	1.99956	1.52031	1.69422	1.86989	1.47759	1.85961
1259	C14H14O7N0S0	8	0.5	1	293.067	0	14	14	0	7	0	0.142857	0.428571	0	78	Highly_Unsaturated_and_Phenolic_HighOC	CHO	7.39766	9.62292	8.2652	6.15352	5.1171	5.80647
1260	C14H14O7N0S1	8	0.5	1	325.039	0	14	14	0	7	1	0	0.368421	0.142857	75	Highly_Unsaturated_and_Phenolic_HighOC	CHOS	0.725426	1.32203	0.598958	0.41324	0.391282	0.387112
1261	C14H14O7N2S0	9	0.5	1	321.073	0.142857	14	14	2	7	0	0	0.411765	0.428571	78	Highly_Unsaturated_and_Phenolic_HighOC	CHON	2.37233	1.85282	2.08179	2.11845	1.79027	2.19215
1262	C14H14O8N0S0	8	0.571429	1	309.062	0	14	14	0	8	0	0	0.4	0.142857	78	Highly_Unsaturated_and_Phenolic_HighOC	CHO	10.0564	11.7125	10.8931	6.17606	6.05872	6.57468
1263	C14H14O8N0S1	8	0.571429	1	341.034	0	14	14	0	8	1	0	0.333333	0.285714	75	Highly_Unsaturated_and_Phenolic_HighOC	CHOS	0.854128	1.57378	0.689983	0.413073	0.408118	0.474153
1264	C14H14O8N2S0	9	0.571429	1	337.068	0.142857	14	14	2	8	0	0	0.375	0.571429	78	Highly_Unsaturated_and_Phenolic_HighOC	CHON	2.1702	1.85278	1.9923	2.33905	2.07779	2.75724
1265	C14H14O9N0S0	8	0.642857	1	325.057	0	14	14	0	9	0	0	0.368421	0.285714	78	Highly_Unsaturated_and_Phenolic_HighOC	CHO	11.9591	13.9736	14.1889	7.37647	8.10024	9.10408
1266	C14H14O9N0S1	8	0.642857	1	357.029	0	14	14	0	9	1	0	0.294118	0.428571	72	Highly_Unsaturated_and_Phenolic_HighOC	CHOS	0.954028	1.46715	0.818308	0.301145	0.487612	0.515472
1267	C14H14O9N2S0	9	0.642857	1	353.063	0.142857	14	14	2	9	0	0	0.333333	0.714286	78	Highly_Unsaturated_and_Phenolic_HighOC	CHON	1.47139	1.13316	1.48516	1.50764	1.48862	2.0055
1268	C14H15O10N1S0	8	0.714286	1.07143	356.062	0.0714286	14	15	1	10	0	0	0.25	0.571429	78	Highly_Unsaturated_and_Phenolic_HighOC	CHON	1.73223	2.01535	2.28067	1.52617	1.59056	2.34092
1269	C14H15O10N1S1	8	0.714286	1.07143	388.034	0.0714286	14	15	1	10	1	0	0.142857	0.714286	31	Highly_Unsaturated_and_Phenolic_HighOC	CHONS	0.218906	0	0.175659	0	0	0
1270	C14H15O11N1S0	8	0.785714	1.07143	372.057	0.0714286	14	15	1	11	0	0	0.2	0.714286	77	Highly_Unsaturated_and_Phenolic_HighOC	CHON	0.550812	0.59252	0.814964	0.525585	0.583204	0.830064
1271	C14H15O11N1S1	8	0.785714	1.07143	404.029	0.0714286	14	15	1	11	1	0	0.0769231	0.857143	14	Highly_Unsaturated_and_Phenolic_HighOC	CHONS	0.091202	0	0.082227	0	0	0
1272	C14H15O12N1S0	8	0.857143	1.07143	388.052	0.0714286	14	15	1	12	0	0	0.142857	0.857143	40	Highly_Unsaturated_and_Phenolic_HighOC	CHON	0.0867092	0.129677	0.142513	0.14089	0.128813	0.203335
1273	C14H15O2N1S0	8	0.142857	1.07143	228.103	0.0714286	14	15	1	2	0	0.454545	0.5	-0.571429	30	Highly_Unsaturated_and_Phenolic_LowOC	CHON	0.329667	0	0.344352	0	0.296428	0.520764
1274	C14H15O3N1S0	8	0.214286	1.07143	244.098	0.0714286	14	15	1	3	0	0.4	0.478261	-0.428571	70	Highly_Unsaturated_and_Phenolic_LowOC	CHON	0.716319	0.799917	0.709006	0.857612	0.67591	0.968204
1275	C14H15O4N1S0	8	0.285714	1.07143	260.093	0.0714286	14	15	1	4	0	0.333333	0.454545	-0.285714	78	Highly_Unsaturated_and_Phenolic_LowOC	CHON	1.01765	1.39012	1.01523	1.40941	0.955246	1.35409
1276	C14H15O5N1S0	8	0.357143	1.07143	276.088	0.0714286	14	15	1	5	0	0.25	0.428571	-0.142857	78	Highly_Unsaturated_and_Phenolic_LowOC	CHON	1.38373	1.95355	1.40067	2.04884	1.24282	1.55124
1277	C14H15O6N1S0	8	0.428571	1.07143	292.083	0.0714286	14	15	1	6	0	0.142857	0.4	0	78	Highly_Unsaturated_and_Phenolic_LowOC	CHON	2.00003	2.68219	2.01955	2.34222	1.70235	2.12992
1278	C14H15O6N1S1	8	0.428571	1.07143	324.055	0.0714286	14	15	1	6	1	0	0.333333	0.142857	39	Highly_Unsaturated_and_Phenolic_LowOC	CHONS	0.261353	0	0.224101	0	0	0
1279	C14H15O7N1S0	8	0.5	1.07143	308.078	0.0714286	14	15	1	7	0	0	0.368421	0.142857	78	Highly_Unsaturated_and_Phenolic_HighOC	CHON	2.75061	3.57517	2.72105	2.58285	2.12002	2.62262
1280	C14H15O7N1S1	8	0.5	1.07143	340.05	0.0714286	14	15	1	7	1	0	0.294118	0.285714	48	Highly_Unsaturated_and_Phenolic_HighOC	CHONS	0.347154	0	0.285366	0	0	0
1281	C14H15O8N1S0	8	0.571429	1.07143	324.072	0.0714286	14	15	1	8	0	0	0.333333	0.285714	78	Highly_Unsaturated_and_Phenolic_HighOC	CHON	3.46469	5.27476	3.67949	12.0239	2.94802	3.76744
1282	C14H15O8N1S1	8	0.571429	1.07143	356.045	0.0714286	14	15	1	8	1	0	0.25	0.428571	48	Highly_Unsaturated_and_Phenolic_HighOC	CHONS	0.437585	0	0.348016	0	0	0
1283	C14H15O9N1S0	8	0.642857	1.07143	340.067	0.0714286	14	15	1	9	0	0	0.294118	0.428571	78	Highly_Unsaturated_and_Phenolic_HighOC	CHON	2.8984	4.19468	3.436	3.06837	2.64438	3.65254
1284	C14H15O9N1S1	8	0.642857	1.07143	372.039	0.0714286	14	15	1	9	1	0	0.2	0.571429	43	Highly_Unsaturated_and_Phenolic_HighOC	CHONS	0.414349	0	0.339559	0	0	0
1285	C14H16O10N0S0	7	0.714286	1.14286	343.067	0	14	16	0	10	0	0	0.222222	0.285714	78	Highly_Unsaturated_and_Phenolic_HighOC	CHO	9.41309	13.959	14.3803	7.28766	7.32412	9.66544
1286	C14H16O10N0S1	7	0.714286	1.14286	375.039	0	14	16	0	10	1	0	0.125	0.428571	61	Highly_Unsaturated_and_Phenolic_HighOC	CHOS	0.595876	1.10996	0.579807	0	0.550015	0.875998
1287	C14H16O10N2S0	8	0.714286	1.14286	371.073	0.142857	14	16	2	10	0	0	0.142857	0.714286	78	Highly_Unsaturated_and_Phenolic_HighOC	CHON	0.531374	0.75487	0.650361	0.476757	0.531865	0.770202
1288	C14H16O11N0S0	7	0.785714	1.14286	359.062	0	14	16	0	11	0	0	0.176471	0.428571	78	Highly_Unsaturated_and_Phenolic_HighOC	CHO	3.71583	4.36419	6.95481	2.57492	3.07969	4.39455
1289	C14H16O11N0S1	7	0.785714	1.14286	391.034	0	14	16	0	11	1	0	0.0666667	0.571429	51	Highly_Unsaturated_and_Phenolic_HighOC	CHOS	0.267585	0.338593	0.287752	0	0.264072	0.443968
1290	C14H16O11N2S0	8	0.785714	1.14286	387.068	0.142857	14	16	2	11	0	0	0.0769231	0.857143	67	Highly_Unsaturated_and_Phenolic_HighOC	CHON	0.145599	0.13297	0.174764	0.125366	0.140422	0.198044
1291	C14H16O12N0S0	7	0.857143	1.14286	375.057	0	14	16	0	12	0	0	0.125	0.571429	78	Highly_Unsaturated_and_Phenolic_HighOC	CHO	0.810531	0.867867	1.55073	0.691265	0.719553	1.01024
1292	C14H16O12N0S1	7	0.857143	1.14286	407.029	0	14	16	0	12	1	0	0	0.714286	29	Highly_Unsaturated_and_Phenolic_HighOC	CHOS	0.118597	0	0.126621	0	0	0.138351
1293	C14H16O12N2S0	8	0.857143	1.14286	403.063	0.142857	14	16	2	12	0	0	0	1	5	Highly_Unsaturated_and_Phenolic_HighOC	CHON	0	0	0.0687853	0	0	0
1294	C14H16O13N0S0	7	0.928571	1.14286	391.052	0	14	16	0	13	0	0	0.0666667	0.714286	37	Sugars_wo_X	CHO	0.109158	0.127542	0.202457	0	0.0977405	0.14957
1295	C14H16O2N0S0	7	0.142857	1.14286	215.108	0	14	16	0	2	0	0.416667	0.461538	-0.857143	76	Highly_Unsaturated_and_Phenolic_LowOC	CHO	1.02027	1.27362	1.13013	1.91329	1.37401	2.08746
1296	C14H16O2N2S0	8	0.142857	1.14286	243.114	0.142857	14	16	2	2	0	0.4	0.454545	-0.428571	14	Highly_Unsaturated_and_Phenolic_LowOC	CHON	0.270096	0	0	0	0	0
1297	C14H16O3N0S0	7	0.214286	1.14286	231.103	0	14	16	0	3	0	0.363636	0.44	-0.714286	77	Highly_Unsaturated_and_Phenolic_LowOC	CHO	1.70453	2.23089	1.94424	3.40808	2.13512	3.09343
1298	C14H16O3N2S0	8	0.214286	1.14286	259.109	0.142857	14	16	2	3	0	0.333333	0.428571	-0.285714	57	Highly_Unsaturated_and_Phenolic_LowOC	CHON	0.504417	0	0.466095	0	0.44477	0.684474
1299	C14H16O4N0S0	7	0.285714	1.14286	247.098	0	14	16	0	4	0	0.3	0.416667	-0.571429	78	Highly_Unsaturated_and_Phenolic_LowOC	CHO	2.52535	3.87722	2.94145	4.89436	2.83184	4.15295
1300	C14H16O4N2S0	8	0.285714	1.14286	275.104	0.142857	14	16	2	4	0	0.25	0.4	-0.142857	76	Highly_Unsaturated_and_Phenolic_LowOC	CHON	0.775769	0.844385	0.705342	1.05434	0.662185	0.91084
1301	C14H16O5N0S0	7	0.357143	1.14286	263.092	0	14	16	0	5	0	0.222222	0.391304	-0.428571	78	Highly_Unsaturated_and_Phenolic_LowOC	CHO	2.93155	5.49207	3.49446	5.64789	3.47883	4.3592
1302	C14H16O5N0S1	7	0.357143	1.14286	295.065	0	14	16	0	5	1	0.125	0.333333	-0.285714	51	Highly_Unsaturated_and_Phenolic_LowOC	CHOS	0.185671	0.485276	0.171335	0	0	0
1303	C14H16O5N2S0	8	0.357143	1.14286	291.099	0.142857	14	16	2	5	0	0.142857	0.368421	0	78	Highly_Unsaturated_and_Phenolic_LowOC	CHON	1.21753	1.27579	1.0554	1.56682	1.08207	1.43939
1304	C14H16O6N0S0	7	0.428571	1.14286	279.087	0	14	16	0	6	0	0.125	0.363636	-0.285714	78	Highly_Unsaturated_and_Phenolic_LowOC	CHO	4.50373	7.70302	5.14501	7.36537	4.54083	5.59869
1305	C14H16O6N0S1	7	0.428571	1.14286	311.059	0	14	16	0	6	1	0	0.3	-0.142857	67	Highly_Unsaturated_and_Phenolic_LowOC	CHOS	0.360376	0.797891	0.301833	0	0	0.356631
1306	C14H16O6N2S0	8	0.428571	1.14286	307.094	0.142857	14	16	2	6	0	0	0.333333	0.142857	78	Highly_Unsaturated_and_Phenolic_LowOC	CHON	1.72874	2.12042	1.48115	2.0586	1.40271	1.84987
1307	C14H16O7N0S0	7	0.5	1.14286	295.082	0	14	16	0	7	0	0	0.333333	-0.142857	78	Highly_Unsaturated_and_Phenolic_HighOC	CHO	7.13048	14.9144	7.8075	9.46136	6.52539	7.59741
1308	C14H16O7N0S1	7	0.5	1.14286	327.054	0	14	16	0	7	1	0	0.263158	0	75	Highly_Unsaturated_and_Phenolic_HighOC	CHOS	0.569721	1.76909	0.471293	0.534098	0.428865	0.520595
1309	C14H16O7N2S0	8	0.5	1.14286	323.088	0.142857	14	16	2	7	0	0	0.294118	0.285714	78	Highly_Unsaturated_and_Phenolic_HighOC	CHON	2.11082	3.03536	1.81756	2.48077	1.89683	2.63646
1310	C14H16O8N0S0	7	0.571429	1.14286	311.077	0	14	16	0	8	0	0	0.3	0	78	Highly_Unsaturated_and_Phenolic_HighOC	CHO	11.9474	22.5187	13.34	10.3341	8.93331	10.1163
1311	C14H16O8N0S1	7	0.571429	1.14286	343.049	0	14	16	0	8	1	0	0.222222	0.142857	75	Highly_Unsaturated_and_Phenolic_HighOC	CHOS	0.794769	2.01626	0.686681	0.576165	0.49534	0.752083
1312	C14H16O8N2S0	8	0.571429	1.14286	339.083	0.142857	14	16	2	8	0	0	0.25	0.428571	78	Highly_Unsaturated_and_Phenolic_HighOC	CHON	2.02523	3.41539	1.92479	2.27303	1.86303	2.78307
1313	C14H16O9N0S0	7	0.642857	1.14286	327.072	0	14	16	0	9	0	0	0.263158	0.142857	78	Highly_Unsaturated_and_Phenolic_HighOC	CHO	13.1464	27.1679	16.3779	11.5347	10.9041	12.8295
1314	C14H16O9N0S1	7	0.642857	1.14286	359.044	0	14	16	0	9	1	0	0.176471	0.285714	72	Highly_Unsaturated_and_Phenolic_HighOC	CHOS	0.8472	1.79547	0.742983	0.635676	0.688544	0.940855
1315	C14H16O9N2S0	8	0.642857	1.14286	355.078	0.142857	14	16	2	9	0	0	0.2	0.571429	78	Highly_Unsaturated_and_Phenolic_HighOC	CHON	1.35806	2.11062	1.40178	1.37552	1.2663	1.91249
1316	C14H17O10N1S0	7	0.714286	1.21429	358.078	0.0714286	14	17	1	10	0	0	0.125	0.428571	78	Highly_Unsaturated_and_Phenolic_HighOC	CHON	1.01591	2.24688	1.37502	0.958272	0.97516	1.44405
1317	C14H17O10N1S1	7	0.714286	1.21429	390.05	0.0714286	14	17	1	10	1	0	0	0.571429	26	Highly_Unsaturated_and_Phenolic_HighOC	CHONS	0.176293	0	0.135866	0	0	0
1318	C14H17O11N1S0	7	0.785714	1.21429	374.073	0.0714286	14	17	1	11	0	0	0.0666667	0.571429	76	Highly_Unsaturated_and_Phenolic_HighOC	CHON	0.297265	0.57092	0.440937	0.401137	0.369413	0.49295
1319	C14H17O11N1S1	7	0.785714	1.21429	406.045	0.0714286	14	17	1	11	1	0	0	0.714286	13	Highly_Unsaturated_and_Phenolic_HighOC	CHONS	0.0980849	0	0.076305	0	0	0
1320	C14H17O12N1S0	7	0.857143	1.21429	390.068	0.0714286	14	17	1	12	0	0	0	0.714286	29	Highly_Unsaturated_and_Phenolic_HighOC	CHON	0.0645629	0.179717	0.080182	0	0	0.0873796
1321	C14H17O2N1S0	7	0.142857	1.21429	230.119	0.0714286	14	17	1	2	0	0.363636	0.416667	-0.714286	24	Highly_Unsaturated_and_Phenolic_LowOC	CHON	0.225032	0	0.207378	0	0.222706	0.355361
1322	C14H17O3N1S0	7	0.214286	1.21429	246.114	0.0714286	14	17	1	3	0	0.3	0.391304	-0.571429	69	Highly_Unsaturated_and_Phenolic_LowOC	CHON	0.379512	0.669299	0.405597	0.659631	0.425755	0.677743
1323	C14H17O4N1S0	7	0.285714	1.21429	262.108	0.0714286	14	17	1	4	0	0.222222	0.363636	-0.428571	78	Highly_Unsaturated_and_Phenolic_LowOC	CHON	0.553278	1.15063	0.591864	1.00184	0.611519	0.88002
1324	C14H17O5N1S0	7	0.357143	1.21429	278.103	0.0714286	14	17	1	5	0	0.125	0.333333	-0.285714	78	Highly_Unsaturated_and_Phenolic_LowOC	CHON	0.819002	1.56644	0.868688	1.52292	0.897878	1.18178
1325	C14H17O6N1S0	7	0.428571	1.21429	294.098	0.0714286	14	17	1	6	0	0	0.3	-0.142857	78	Highly_Unsaturated_and_Phenolic_LowOC	CHON	1.23797	2.8876	1.25513	2.07137	1.30923	1.69785
1326	C14H17O6N1S1	7	0.428571	1.21429	326.07	0.0714286	14	17	1	6	1	0	0.222222	0	35	Highly_Unsaturated_and_Phenolic_LowOC	CHONS	0.167594	0	0.135845	0	0	0
1327	C14H17O7N1S0	7	0.5	1.21429	310.093	0.0714286	14	17	1	7	0	0	0.263158	0	78	Highly_Unsaturated_and_Phenolic_HighOC	CHON	2.01573	4.8664	2.05602	2.37686	1.74541	2.20312
1328	C14H17O7N1S1	7	0.5	1.21429	342.065	0.0714286	14	17	1	7	1	0	0.176471	0.142857	46	Highly_Unsaturated_and_Phenolic_HighOC	CHONS	0.230569	0	0.21526	0	0	0
1329	C14H17O8N1S0	7	0.571429	1.21429	326.088	0.0714286	14	17	1	8	0	0	0.222222	0.142857	78	Highly_Unsaturated_and_Phenolic_HighOC	CHON	2.62242	6.90473	2.75028	3.36234	2.43351	3.22792
1330	C14H17O8N1S1	7	0.571429	1.21429	358.06	0.0714286	14	17	1	8	1	0	0.125	0.285714	47	Highly_Unsaturated_and_Phenolic_HighOC	CHONS	0.29849	0	0.280232	0	0	0
1331	C14H17O9N1S0	7	0.642857	1.21429	342.083	0.0714286	14	17	1	9	0	0	0.176471	0.285714	78	Highly_Unsaturated_and_Phenolic_HighOC	CHON	2.11793	4.80638	2.36213	2.09716	1.77552	2.58816
1332	C14H17O9N1S1	7	0.642857	1.21429	374.055	0.0714286	14	17	1	9	1	0	0.0666667	0.428571	40	Highly_Unsaturated_and_Phenolic_HighOC	CHONS	0.323556	0	0.23571	0	0	0
1333	C14H18O10N0S0	6	0.714286	1.28571	345.083	0	14	18	0	10	0	0	0.111111	0.142857	78	Highly_Unsaturated_and_Phenolic_HighOC	CHO	4.43695	9.82562	7.23042	3.27044	3.21145	4.42922
1334	C14H18O10N0S1	6	0.714286	1.28571	377.055	0	14	18	0	10	1	0	0	0.285714	58	Highly_Unsaturated_and_Phenolic_HighOC	CHOS	0.567739	1.31765	0.552498	0	0.653816	1.09538
1335	C14H18O10N2S0	7	0.714286	1.28571	373.089	0.142857	14	18	2	10	0	0	0	0.571429	78	Highly_Unsaturated_and_Phenolic_HighOC	CHON	0.295268	0.841961	0.33319	0.294384	0.278022	0.398712
1336	C14H18O11N0S0	6	0.785714	1.28571	361.078	0	14	18	0	11	0	0	0.0588235	0.285714	78	Highly_Unsaturated_and_Phenolic_HighOC	CHO	1.17171	1.9622	1.97867	0.823391	0.919588	1.36577
1337	C14H18O11N0S1	6	0.785714	1.28571	393.05	0	14	18	0	11	1	0	0	0.428571	50	Highly_Unsaturated_and_Phenolic_HighOC	CHOS	0.25745	0.408932	0.201968	0	0.222898	0.422504
1338	C14H18O11N2S0	7	0.785714	1.28571	389.084	0.142857	14	18	2	11	0	0	0	0.714286	55	Highly_Unsaturated_and_Phenolic_HighOC	CHON	0.0949384	0.15164	0.111539	0	0	0.096778
1339	C14H18O12N0S0	6	0.857143	1.28571	377.073	0	14	18	0	12	0	0	0	0.428571	77	Highly_Unsaturated_and_Phenolic_HighOC	CHO	0.231008	0.407593	0.394775	0.178116	0.196539	0.292493
1340	C14H18O12N0S1	6	0.857143	1.28571	409.045	0	14	18	0	12	1	0	0	0.571429	32	Highly_Unsaturated_and_Phenolic_HighOC	CHOS	0.104393	0	0.108045	0	0	0.115913
1341	C14H18O13N0S0	6	0.928571	1.28571	393.067	0	14	18	0	13	0	0	0	0.571429	5	Sugars_wo_X	CHO	0	0	0.0858271	0	0.0885372	0
1342	C14H18O2N0S0	6	0.142857	1.28571	217.123	0	14	18	0	2	0	0.333333	0.384615	-1	76	Highly_Unsaturated_and_Phenolic_LowOC	CHO	0.818624	1.25759	0.957732	2.21927	1.18414	1.9279
1343	C14H18O2N2S0	7	0.142857	1.28571	245.13	0.142857	14	18	2	2	0	0.3	0.363636	-0.571429	11	Highly_Unsaturated_and_Phenolic_LowOC	CHON	0.114452	0	0	0	0	0
1344	C14H18O3N0S0	6	0.214286	1.28571	233.118	0	14	18	0	3	0	0.272727	0.36	-0.857143	78	Highly_Unsaturated_and_Phenolic_LowOC	CHO	1.24364	1.99086	1.4538	3.34623	1.74762	2.61563
1345	C14H18O3N2S0	7	0.214286	1.28571	261.124	0.142857	14	18	2	3	0	0.222222	0.333333	-0.428571	57	Highly_Unsaturated_and_Phenolic_LowOC	CHON	0.224155	0	0.200285	0	0.224405	0.308623
1346	C14H18O4N0S0	6	0.285714	1.28571	249.113	0	14	18	0	4	0	0.2	0.333333	-0.714286	78	Highly_Unsaturated_and_Phenolic_LowOC	CHO	1.73772	3.48486	1.99211	4.39148	2.25585	3.18047
1347	C14H18O4N2S0	7	0.285714	1.28571	277.119	0.142857	14	18	2	4	0	0.125	0.3	-0.285714	76	Highly_Unsaturated_and_Phenolic_LowOC	CHON	0.359211	0.710366	0.317256	0.577751	0.361332	0.501586
1348	C14H18O5N0S0	6	0.357143	1.28571	265.108	0	14	18	0	5	0	0.111111	0.304348	-0.571429	78	Highly_Unsaturated_and_Phenolic_LowOC	CHO	2.32973	5.47141	2.74704	5.30417	2.71467	3.60234
1349	C14H18O5N0S1	6	0.357143	1.28571	297.08	0	14	18	0	5	1	0	0.238095	-0.428571	51	Highly_Unsaturated_and_Phenolic_LowOC	CHOS	0.145554	0.426408	0.139573	0	0	0
1350	C14H18O5N2S0	7	0.357143	1.28571	293.114	0.142857	14	18	2	5	0	0	0.263158	-0.142857	78	Highly_Unsaturated_and_Phenolic_LowOC	CHON	0.59807	1.18392	0.514345	1.15066	0.572814	0.789507
1351	C14H18O6N0S0	6	0.428571	1.28571	281.103	0	14	18	0	6	0	0	0.272727	-0.428571	78	Highly_Unsaturated_and_Phenolic_LowOC	CHO	4.12766	10.106	4.31127	7.54624	3.87111	4.79157
1352	C14H18O6N0S1	6	0.428571	1.28571	313.075	0	14	18	0	6	1	0	0.2	-0.285714	67	Highly_Unsaturated_and_Phenolic_LowOC	CHOS	0.311605	0.955392	0.247853	0	0	0.42733
1353	C14H18O6N2S0	7	0.428571	1.28571	309.109	0.142857	14	18	2	6	0	0	0.222222	0	78	Highly_Unsaturated_and_Phenolic_LowOC	CHON	0.946222	2.15201	0.798625	1.27494	0.789235	1.05131
1354	C14H18O7N0S0	6	0.5	1.28571	297.098	0	14	18	0	7	0	0	0.238095	-0.285714	78	Highly_Unsaturated_and_Phenolic_HighOC	CHO	6.79961	19.6317	6.84962	10.9915	5.05493	6.07576
1355	C14H18O7N2S0	7	0.5	1.28571	325.104	0.142857	14	18	2	7	0	0	0.176471	0.142857	78	Highly_Unsaturated_and_Phenolic_HighOC	CHON	1.29017	3.58986	1.15007	1.59286	1.11096	1.56221
1356	C14H18O8N0S0	6	0.571429	1.28571	313.093	0	14	18	0	8	0	0	0.2	-0.142857	78	Highly_Unsaturated_and_Phenolic_HighOC	CHO	10.1974	31.7842	11.1292	11.1995	7.08942	8.25458
1357	C14H18O8N0S1	6	0.571429	1.28571	345.065	0	14	18	0	8	1	0	0.111111	0	75	Highly_Unsaturated_and_Phenolic_HighOC	CHOS	0.889979	2.49502	0.80427	1.04466	0.857057	1.28457
1358	C14H18O8N2S0	7	0.571429	1.28571	341.099	0.142857	14	18	2	8	0	0	0.125	0.285714	78	Highly_Unsaturated_and_Phenolic_HighOC	CHON	1.23139	3.72008	1.14029	1.33412	1.01018	1.47055
1359	C14H18O9N0S0	6	0.642857	1.28571	329.088	0	14	18	0	9	0	0	0.157895	0	78	Highly_Unsaturated_and_Phenolic_HighOC	CHO	8.87862	26.9221	11.5026	7.58572	6.32196	8.12288
1360	C14H18O9N0S1	6	0.642857	1.28571	361.06	0	14	18	0	9	1	0	0.0588235	0.142857	72	Highly_Unsaturated_and_Phenolic_HighOC	CHOS	0.89482	2.27051	0.804568	1.00017	0.89977	1.4675
1361	C14H18O9N2S0	7	0.642857	1.28571	357.094	0.142857	14	18	2	9	0	0	0.0666667	0.428571	78	Highly_Unsaturated_and_Phenolic_HighOC	CHON	0.784089	2.05378	0.780944	0.716304	0.621139	0.951058
1362	C14H19O10N1S0	6	0.714286	1.35714	360.094	0.0714286	14	19	1	10	0	0	0	0.285714	77	Highly_Unsaturated_and_Phenolic_HighOC	CHON	0.403791	1.30538	0.470569	0.342628	0.332311	0.443206
1363	C14H19O10N1S1	6	0.714286	1.35714	392.066	0.0714286	14	19	1	10	1	0	0	0.428571	23	Highly_Unsaturated_and_Phenolic_HighOC	CHONS	0.11005	0	0.0928569	0	0	0
1364	C14H19O11N1S0	6	0.785714	1.35714	376.089	0.0714286	14	19	1	11	0	0	0	0.428571	62	Highly_Unsaturated_and_Phenolic_HighOC	CHON	0.136039	0.526416	0.139509	0.211169	0.124965	0.142373
1365	C14H19O12N1S0	6	0.857143	1.35714	392.083	0.0714286	14	19	1	12	0	0	0	0.571429	29	Highly_Unsaturated_and_Phenolic_HighOC	CHON	0	0.246763	0	0	0	0
1366	C14H19O2N1S0	6	0.142857	1.35714	232.134	0.0714286	14	19	1	2	0	0.272727	0.333333	-0.857143	14	Highly_Unsaturated_and_Phenolic_LowOC	CHON	0.0938946	0	0.07377	0	0.102583	0.165319
1367	C14H19O3N1S0	6	0.214286	1.35714	248.129	0.0714286	14	19	1	3	0	0.2	0.304348	-0.714286	61	Highly_Unsaturated_and_Phenolic_LowOC	CHON	0.193674	0.309467	0.167671	0.32727	0.183456	0.29914
1368	C14H19O4N1S0	6	0.285714	1.35714	264.124	0.0714286	14	19	1	4	0	0.111111	0.272727	-0.571429	78	Highly_Unsaturated_and_Phenolic_LowOC	CHON	0.246604	0.640136	0.263851	0.504635	0.290367	0.388933
1369	C14H19O5N1S0	6	0.357143	1.35714	280.119	0.0714286	14	19	1	5	0	0	0.238095	-0.428571	78	Highly_Unsaturated_and_Phenolic_LowOC	CHON	0.387574	1.17733	0.397289	0.773979	0.431591	0.550399
1370	C14H19O6N1S0	6	0.428571	1.35714	296.114	0.0714286	14	19	1	6	0	0	0.2	-0.285714	78	Highly_Unsaturated_and_Phenolic_LowOC	CHON	0.559359	2.00764	0.568751	1.15467	0.634094	0.835695
1371	C14H19O6N1S1	6	0.428571	1.35714	328.086	0.0714286	14	19	1	6	1	0	0.111111	-0.142857	23	Highly_Unsaturated_and_Phenolic_LowOC	CHONS	0.102699	0	0.0908971	0	0	0
1372	C14H19O7N1S0	6	0.5	1.35714	312.109	0.0714286	14	19	1	7	0	0	0.157895	-0.142857	78	Highly_Unsaturated_and_Phenolic_HighOC	CHON	0.993253	3.885	0.957881	1.34781	0.844775	1.07629
1373	C14H19O7N1S1	6	0.5	1.35714	344.081	0.0714286	14	19	1	7	1	0	0.0588235	0	34	Highly_Unsaturated_and_Phenolic_HighOC	CHONS	0.185596	0	0.173358	0	0	0
1374	C14H19O8N1S0	6	0.571429	1.35714	328.104	0.0714286	14	19	1	8	0	0	0.111111	0	78	Highly_Unsaturated_and_Phenolic_HighOC	CHON	1.16327	6.15825	1.16202	1.38103	0.936391	1.28775
1375	C14H19O8N1S1	6	0.571429	1.35714	360.076	0.0714286	14	19	1	8	1	0	0	0.142857	38	Highly_Unsaturated_and_Phenolic_HighOC	CHONS	0.233473	0	0.177214	0	0	0
1376	C14H19O9N1S0	6	0.642857	1.35714	344.099	0.0714286	14	19	1	9	0	0	0.0588235	0.142857	78	Highly_Unsaturated_and_Phenolic_HighOC	CHON	0.837382	3.39212	0.962376	0.741595	0.652629	0.91918
1377	C14H19O9N1S1	6	0.642857	1.35714	376.071	0.0714286	14	19	1	9	1	0	0	0.285714	31	Highly_Unsaturated_and_Phenolic_HighOC	CHONS	0.18667	0	0.170163	0	0	0
1378	C14H20O10N0S0	5	0.714286	1.42857	347.098	0	14	20	0	10	0	0	0	0	78	Highly_Unsaturated_and_Phenolic_HighOC	CHO	1.06408	2.72735	1.44308	0.85853	0.66071	0.993605
1379	C14H20O10N0S1	5	0.714286	1.42857	379.07	0	14	20	0	10	1	0	0	0.142857	58	Highly_Unsaturated_and_Phenolic_HighOC	CHOS	0.470305	1.32738	0.403232	0	0.413954	0.725624
1380	C14H20O10N2S0	6	0.714286	1.42857	375.105	0.142857	14	20	2	10	0	0	0	0.428571	66	Highly_Unsaturated_and_Phenolic_HighOC	CHON	0.157036	0.61774	0.125982	0	0	0
1381	C14H20O11N0S0	5	0.785714	1.42857	363.093	0	14	20	0	11	0	0	0	0.142857	78	Highly_Unsaturated_and_Phenolic_HighOC	CHO	0.313012	0.83107	0.352362	0.18496	0.195064	0.271918
1382	C14H20O11N0S1	5	0.785714	1.42857	395.065	0	14	20	0	11	1	0	0	0.285714	47	Highly_Unsaturated_and_Phenolic_HighOC	CHOS	0.141697	0.360158	0.138295	0	0.128172	0.244824
1383	C14H20O11N2S0	6	0.785714	1.42857	391.099	0.142857	14	20	2	11	0	0	0	0.571429	38	Highly_Unsaturated_and_Phenolic_HighOC	CHON	0	0.176425	0.0696374	0	0	0
1384	C14H20O12N0S0	5	0.857143	1.42857	379.088	0	14	20	0	12	0	0	0	0.285714	68	Highly_Unsaturated_and_Phenolic_HighOC	CHO	0.115511	0.432088	0.123319	0	0	0.0923752
1385	C14H20O2N0S0	5	0.142857	1.42857	219.139	0	14	20	0	2	0	0.25	0.307692	-1.14286	75	Highly_Unsaturated_and_Phenolic_LowOC	CHO	0.408904	0.806828	0.468268	1.32769	0.60238	0.917656
1386	C14H20O3N0S0	5	0.214286	1.42857	235.134	0	14	20	0	3	0	0.181818	0.28	-1	78	Highly_Unsaturated_and_Phenolic_LowOC	CHO	0.69558	1.32944	0.776513	1.93257	0.8644	1.25384
1387	C14H20O3N2S0	6	0.214286	1.42857	263.14	0.142857	14	20	2	3	0	0.111111	0.238095	-0.571429	32	Highly_Unsaturated_and_Phenolic_LowOC	CHON	0.0845157	0	0	0	0	0.0927985
1388	C14H20O4N0S0	5	0.285714	1.42857	251.129	0	14	20	0	4	0	0.1	0.25	-0.857143	78	Highly_Unsaturated_and_Phenolic_LowOC	CHO	0.863522	2.53663	0.955772	2.38696	1.04478	1.50357
1389	C14H20O4N2S0	6	0.285714	1.42857	279.135	0.142857	14	20	2	4	0	0	0.2	-0.428571	73	Highly_Unsaturated_and_Phenolic_LowOC	CHON	0.180256	0.337834	0.124874	0.234706	0.111818	0.180432
1390	C14H20O5N0S0	5	0.357143	1.42857	267.124	0	14	20	0	5	0	0	0.217391	-0.714286	78	Highly_Unsaturated_and_Phenolic_LowOC	CHO	1.31681	4.51616	1.41156	3.13231	1.29609	1.69967
1391	C14H20O5N2S0	6	0.357143	1.42857	295.13	0.142857	14	20	2	5	0	0	0.157895	-0.285714	78	Highly_Unsaturated_and_Phenolic_LowOC	CHON	0.2057	0.659892	0.181858	0.346634	0.177652	0.256593
1392	C14H20O6N0S0	5	0.428571	1.42857	283.119	0	14	20	0	6	0	0	0.181818	-0.571429	78	Highly_Unsaturated_and_Phenolic_LowOC	CHO	2.45542	9.37659	2.39023	4.37679	1.79188	2.22429
1393	C14H20O6N0S1	5	0.428571	1.42857	315.091	0	14	20	0	6	1	0	0.1	-0.428571	67	Highly_Unsaturated_and_Phenolic_LowOC	CHOS	0.315947	1.06043	0.287539	0	0	0.535751
1394	C14H20O6N2S0	6	0.428571	1.42857	311.125	0.142857	14	20	2	6	0	0	0.111111	-0.142857	78	Highly_Unsaturated_and_Phenolic_LowOC	CHON	0.374474	1.77264	0.315743	0.489694	0.238996	0.358028
1395	C14H20O7N0S0	5	0.5	1.42857	299.114	0	14	20	0	7	0	0	0.142857	-0.428571	78	Highly_Unsaturated_and_Phenolic_HighOC	CHO	3.4625	15.3305	3.30887	4.29324	1.98325	2.46869
1396	C14H20O7N0S1	5	0.5	1.42857	331.086	0	14	20	0	7	1	0	0.0526316	-0.285714	75	Highly_Unsaturated_and_Phenolic_HighOC	CHOS	0.752685	2.35109	0.589074	1.09307	0.686973	0.918629
1397	C14H20O7N2S0	6	0.5	1.42857	327.12	0.142857	14	20	2	7	0	0	0.0588235	0	78	Highly_Unsaturated_and_Phenolic_HighOC	CHON	0.54638	2.88676	0.441875	0.560056	0.371754	0.539857
1398	C14H20O8N0S0	5	0.571429	1.42857	315.109	0	14	20	0	8	0	0	0.1	-0.285714	78	Highly_Unsaturated_and_Phenolic_HighOC	CHO	3.88279	20.4574	4.17081	3.77107	2.32922	2.78921
1399	C14H20O8N0S1	5	0.571429	1.42857	347.081	0	14	20	0	8	1	0	0	-0.142857	75	Highly_Unsaturated_and_Phenolic_HighOC	CHOS	1.07288	3.56504	0.917535	1.42977	0.991739	1.56928
1400	C14H20O8N2S0	6	0.571429	1.42857	343.115	0.142857	14	20	2	8	0	0	0	0.142857	78	Highly_Unsaturated_and_Phenolic_HighOC	CHON	0.512858	2.76957	0.432118	0.476006	0.32872	0.449514
1401	C14H20O9N0S0	5	0.642857	1.42857	331.103	0	14	20	0	9	0	0	0.0526316	-0.142857	78	Highly_Unsaturated_and_Phenolic_HighOC	CHO	2.47599	10.7171	3.1039	2.14791	1.60082	2.13411
1402	C14H20O9N0S1	5	0.642857	1.42857	363.076	0	14	20	0	9	1	0	0	0	71	Highly_Unsaturated_and_Phenolic_HighOC	CHOS	0.854294	2.75904	0.80574	0.951094	0.798246	1.25286
1403	C14H20O9N2S0	6	0.642857	1.42857	359.11	0.142857	14	20	2	9	0	0	0	0.285714	77	Highly_Unsaturated_and_Phenolic_HighOC	CHON	0.293438	1.52139	0.312931	0.263418	0.181917	0.270945
1404	C14H21O10N1S0	5	0.714286	1.5	362.109	0.0714286	14	21	1	10	0	0	0	0.142857	70	Peptide_like	CHON	0.170453	1.1557	0.15146	0.137385	0	0.0951693
1405	C14H21O11N1S0	5	0.785714	1.5	378.104	0.0714286	14	21	1	11	0	0	0	0.285714	50	Peptide_like	CHON	0.0885547	0.857157	0.103252	0	0	0
1406	C14H21O12N1S0	5	0.857143	1.5	394.099	0.0714286	14	21	1	12	0	0	0	0.428571	28	Peptide_like	CHON	0	0.237102	0	0	0	0
1407	C14H21O3N1S0	5	0.214286	1.5	250.145	0.0714286	14	21	1	3	0	0.1	0.217391	-0.857143	40	Peptide_like	CHON	0	0.134345	0.0646952	0.190887	0	0.110283
1408	C14H21O4N1S0	5	0.285714	1.5	266.14	0.0714286	14	21	1	4	0	0	0.181818	-0.714286	50	Peptide_like	CHON	0.0761201	0.28678	0.0887882	0.159253	0.0934435	0.104144
1409	C14H21O5N1S0	5	0.357143	1.5	282.135	0.0714286	14	21	1	5	0	0	0.142857	-0.571429	63	Peptide_like	CHON	0.10527	0.411899	0.102954	0.306988	0.121085	0.170568
1410	C14H21O6N1S0	5	0.428571	1.5	298.13	0.0714286	14	21	1	6	0	0	0.1	-0.428571	74	Peptide_like	CHON	0.177609	0.926881	0.183818	0.31066	0.147092	0.217306
1411	C14H21O7N1S0	5	0.5	1.5	314.125	0.0714286	14	21	1	7	0	0	0.0526316	-0.285714	78	Peptide_like	CHON	0.280247	1.95511	0.273266	0.426427	0.222898	0.246771
1412	C14H21O7N1S1	5	0.5	1.5	346.097	0.0714286	14	21	1	7	1	0	0	-0.142857	27	Peptide_like	CHONS	0.124996	0	0.0933895	0	0	0
1413	C14H21O8N1S0	5	0.571429	1.5	330.119	0.0714286	14	21	1	8	0	0	0	-0.142857	78	Peptide_like	CHON	0.326808	2.08645	0.30309	0.286288	0.211963	0.267431
1414	C14H21O8N1S1	5	0.571429	1.5	362.092	0.0714286	14	21	1	8	1	0	0	0	31	Peptide_like	CHONS	0.145539	0	0.125599	0	0	0
1415	C14H21O9N1S0	5	0.642857	1.5	346.114	0.0714286	14	21	1	9	0	0	0	0	77	Peptide_like	CHON	0.247663	1.66283	0.294526	0.22469	0.140326	0.199822
1416	C14H21O9N1S1	5	0.642857	1.5	378.086	0.0714286	14	21	1	9	1	0	0	0.142857	28	Peptide_like	CHONS	0.104408	0	0.101101	0	0	0
1417	C14H22O10N0S0	4	0.714286	1.57143	349.114	0	14	22	0	10	0	0	0	-0.142857	76	Aliphatic_HighOC	CHO	0.193825	0.937446	0.221885	0.26008	0	0.125735
1418	C14H22O10N0S1	4	0.714286	1.57143	381.086	0	14	22	0	10	1	0	0	0	50	Aliphatic_HighOC	CHOS	0.213672	1.09498	0.202628	0	0.159181	0.255704
1419	C14H22O10N2S0	5	0.714286	1.57143	377.12	0.142857	14	22	2	10	0	0	0	0.285714	50	Peptide_like	CHON	0	0.464725	0	0	0	0
1420	C14H22O11N0S0	4	0.785714	1.57143	365.109	0	14	22	0	11	0	0	0	0	56	Aliphatic_HighOC	CHO	0	0.534339	0.103934	0	0	0
1421	C14H22O11N0S1	4	0.785714	1.57143	397.081	0	14	22	0	11	1	0	0	0.142857	30	Aliphatic_HighOC	CHOS	0	0.28479	0.0688279	0	0	0
1422	C14H22O12N0S0	4	0.857143	1.57143	381.104	0	14	22	0	12	0	0	0	0.142857	48	Aliphatic_HighOC	CHO	0.0890085	0.381759	0	0	0	0
1423	C14H22O13N0S0	4	0.928571	1.57143	397.099	0	14	22	0	13	0	0	0	0.285714	17	Sugars_wo_X	CHO	0	0.187967	0	0	0	0
1424	C14H22O2N0S0	4	0.142857	1.57143	221.155	0	14	22	0	2	0	0.166667	0.230769	-1.28571	58	Aliphatic_LowOC	CHO	0.160515	0.312398	0.159555	0.464822	0.205486	0.298166
1425	C14H22O3N0S0	4	0.214286	1.57143	237.15	0	14	22	0	3	0	0.0909091	0.2	-1.14286	67	Aliphatic_LowOC	CHO	0.245545	0.498266	0.236435	0.582759	0.237745	0.318233
1426	C14H22O4N0S0	4	0.285714	1.57143	253.145	0	14	22	0	4	0	0	0.166667	-1	76	Aliphatic_LowOC	CHO	0.284376	1.02624	0.310886	0.717807	0.236399	0.361923
1427	C14H22O4N2S0	5	0.285714	1.57143	281.151	0.142857	14	22	2	4	0	0	0.1	-0.571429	31	Peptide_like	CHON	0.0807944	0.19846	0	0	0	0
1428	C14H22O5N0S0	4	0.357143	1.57143	269.139	0	14	22	0	5	0	0	0.130435	-0.857143	78	Aliphatic_LowOC	CHO	0.404305	2.01752	0.387724	0.95727	0.27613	0.385249
1429	C14H22O5N0S1	4	0.357143	1.57143	301.112	0	14	22	0	5	1	0	0.047619	-0.714286	45	Aliphatic_LowOC	CHOS	0.118688	0.308381	0.104041	0	0	0
1430	C14H22O5N2S0	5	0.357143	1.57143	297.146	0.142857	14	22	2	5	0	0	0.0526316	-0.428571	59	Peptide_like	CHON	0	0.421994	0	0	0	0.0865329
1431	C14H22O6N0S0	4	0.428571	1.57143	285.134	0	14	22	0	6	0	0	0.0909091	-0.714286	78	Aliphatic_LowOC	CHO	0.654555	3.85869	0.587689	1.13372	0.359247	0.482027
1432	C14H22O6N0S1	4	0.428571	1.57143	317.106	0	14	22	0	6	1	0	0	-0.571429	60	Aliphatic_LowOC	CHOS	0.312301	1.07537	0.232771	0	0	0.308962
1433	C14H22O6N2S0	5	0.428571	1.57143	313.141	0.142857	14	22	2	6	0	0	0	-0.285714	74	Peptide_like	CHON	0.115345	0.92764	0.0841656	0.155664	0	0
1434	C14H22O7N0S0	4	0.5	1.57143	301.129	0	14	22	0	7	0	0	0.047619	-0.571429	78	Aliphatic_HighOC	CHO	0.743351	4.93558	0.702615	0.91295	0.3765	0.433427
1435	C14H22O7N0S1	4	0.5	1.57143	333.101	0	14	22	0	7	1	0	0	-0.428571	75	Aliphatic_HighOC	CHOS	0.617508	2.57082	0.502501	0.798852	0.448683	0.593242
1436	C14H22O7N2S0	5	0.5	1.57143	329.135	0.142857	14	22	2	7	0	0	0	-0.142857	75	Peptide_like	CHON	0.221296	2.29298	0.176021	0	0	0.100419
1437	C14H22O8N0S0	4	0.571429	1.57143	317.124	0	14	22	0	8	0	0	0	-0.428571	78	Aliphatic_HighOC	CHO	0.638247	9.80669	0.702125	0.663053	0.361781	0.436348
1438	C14H22O8N0S1	4	0.571429	1.57143	349.096	0	14	22	0	8	1	0	0	-0.285714	75	Aliphatic_HighOC	CHOS	0.849922	3.59243	0.680099	0.76413	0.518557	0.748019
1439	C14H22O8N2S0	5	0.571429	1.57143	345.13	0.142857	14	22	2	8	0	0	0	0	74	Peptide_like	CHON	0.214504	1.72658	0.191572	0	0	0.118073
1440	C14H22O9N0S0	4	0.642857	1.57143	333.119	0	14	22	0	9	0	0	0	-0.285714	78	Aliphatic_HighOC	CHO	0.385971	2.45808	0.39077	0.562393	0.213118	0.313407
1441	C14H22O9N0S1	4	0.642857	1.57143	365.091	0	14	22	0	9	1	0	0	-0.142857	71	Aliphatic_HighOC	CHOS	0.594847	2.80271	0.49562	0.4826	0.3596	0.510096
1442	C14H22O9N2S0	5	0.642857	1.57143	361.125	0.142857	14	22	2	9	0	0	0	0.142857	61	Peptide_like	CHON	0.129822	0.80245	0.101165	0	0	0
1443	C14H23O10N1S0	4	0.714286	1.64286	364.125	0.0714286	14	23	1	10	0	0	0	0	48	Peptide_like	CHON	0	0.806792	0	0	0	0
1444	C14H23O11N1S0	4	0.785714	1.64286	380.12	0.0714286	14	23	1	11	0	0	0	0.142857	41	Peptide_like	CHON	0	0.710004	0	0	0	0
1445	C14H23O12N1S0	4	0.857143	1.64286	396.115	0.0714286	14	23	1	12	0	0	0	0.285714	31	Peptide_like	CHON	0	0.3463	0	0	0	0
1446	C14H23O5N1S0	4	0.357143	1.64286	284.15	0.0714286	14	23	1	5	0	0	0.047619	-0.714286	30	Peptide_like	CHON	0.0741687	0.138976	0	0.120859	0	0
1447	C14H23O6N1S0	4	0.428571	1.64286	300.145	0.0714286	14	23	1	6	0	0	0	-0.571429	32	Peptide_like	CHON	0	0.25447	0	0.123446	0	0
1448	C14H23O7N1S0	4	0.5	1.64286	316.14	0.0714286	14	23	1	7	0	0	0	-0.428571	42	Peptide_like	CHON	0	0.679177	0.0602217	0	0	0
1449	C14H23O8N1S0	4	0.571429	1.64286	332.135	0.0714286	14	23	1	8	0	0	0	-0.285714	65	Peptide_like	CHON	0.0943484	0.823978	0.078137	0	0	0
1450	C14H23O8N1S1	4	0.571429	1.64286	364.107	0.0714286	14	23	1	8	1	0	0	-0.142857	22	Peptide_like	CHONS	0.0864672	0	0.0609673	0	0	0
1451	C14H23O9N1S0	4	0.642857	1.64286	348.13	0.0714286	14	23	1	9	0	0	0	-0.142857	60	Peptide_like	CHON	0	0.733052	0.0726836	0	0	0
1452	C14H24O10N0S0	3	0.714286	1.71429	351.13	0	14	24	0	10	0	0	0	-0.285714	61	Aliphatic_HighOC	CHO	0	0.476086	0	0	0	0
1453	C14H24O10N0S1	3	0.714286	1.71429	383.102	0	14	24	0	10	1	0	0	-0.142857	35	Aliphatic_HighOC	CHOS	0	1.10034	0	0	0	0
1454	C14H24O10N2S0	4	0.714286	1.71429	379.136	0.142857	14	24	2	10	0	0	0	0.142857	17	Peptide_like	CHON	0	0.213439	0	0	0	0
1455	C14H24O11N0S0	3	0.785714	1.71429	367.125	0	14	24	0	11	0	0	0	-0.142857	52	Aliphatic_HighOC	CHO	0	0.733595	0	0	0	0
1456	C14H24O11N0S1	3	0.785714	1.71429	399.097	0	14	24	0	11	1	0	0	0	14	Aliphatic_HighOC	CHOS	0	0.167343	0	0	0	0
1457	C14H24O12N0S0	3	0.857143	1.71429	383.12	0	14	24	0	12	0	0	0	0	38	Aliphatic_HighOC	CHO	0	0.39663	0	0	0	0
1458	C14H24O3N0S0	3	0.214286	1.71429	239.165	0	14	24	0	3	0	0	0.12	-1.28571	29	Aliphatic_LowOC	CHO	0	0.131088	0	0	0	0
1459	C14H24O4N0S0	3	0.285714	1.71429	255.16	0	14	24	0	4	0	0	0.0833333	-1.14286	41	Aliphatic_LowOC	CHO	0	0.238911	0	0.123446	0	0
1460	C14H24O5N0S0	3	0.357143	1.71429	271.155	0	14	24	0	5	0	0	0.0434783	-1	53	Aliphatic_LowOC	CHO	0.0693734	0.41331	0.0640988	0.142393	0	0
1461	C14H24O5N0S1	3	0.357143	1.71429	303.127	0	14	24	0	5	1	0	0	-0.857143	35	Aliphatic_LowOC	CHOS	0	0.182359	0	0	0	0
1462	C14H24O5N2S0	4	0.357143	1.71429	299.161	0.142857	14	24	2	5	0	0	0	-0.571429	41	Peptide_like	CHON	0	0.286925	0	0	0	0
1463	C14H24O6N0S0	3	0.428571	1.71429	287.15	0	14	24	0	6	0	0	0	-0.857143	67	Aliphatic_LowOC	CHO	0.0970259	1.27546	0.0856141	0.159837	0	0
1464	C14H24O6N0S1	3	0.428571	1.71429	319.122	0	14	24	0	6	1	0	0	-0.714286	48	Aliphatic_LowOC	CHOS	0.130866	0.70407	0.123277	0	0	0.115786
1465	C14H24O6N2S0	4	0.428571	1.71429	315.156	0.142857	14	24	2	6	0	0	0	-0.428571	43	Peptide_like	CHON	0	0.966862	0	0	0	0
1466	C14H24O7N0S0	3	0.5	1.71429	303.145	0	14	24	0	7	0	0	0	-0.714286	64	Aliphatic_HighOC	CHO	0.0950745	1.15935	0.0941564	0	0	0
1467	C14H24O7N0S1	3	0.5	1.71429	335.117	0	14	24	0	7	1	0	0	-0.571429	71	Aliphatic_HighOC	CHOS	0.270323	1.88321	0.206121	0.221936	0.139684	0.162863
1468	C14H24O7N2S0	4	0.5	1.71429	331.151	0.142857	14	24	2	7	0	0	0	-0.285714	60	Peptide_like	CHON	0	0.93911	0.0611377	0	0	0
1469	C14H24O8N0S0	3	0.571429	1.71429	319.14	0	14	24	0	8	0	0	0	-0.571429	54	Aliphatic_HighOC	CHO	0.0818987	0.814969	0.0576228	0.244305	0	0
1470	C14H24O8N0S1	3	0.571429	1.71429	351.112	0	14	24	0	8	1	0	0	-0.428571	73	Aliphatic_HighOC	CHOS	0.354839	3.22908	0.246596	0.226276	0	0.179077
1471	C14H24O8N2S0	4	0.571429	1.71429	347.146	0.142857	14	24	2	8	0	0	0	-0.142857	45	Peptide_like	CHON	0	1.98337	0	0	0	0
1472	C14H24O9N0S0	3	0.642857	1.71429	335.135	0	14	24	0	9	0	0	0	-0.428571	45	Aliphatic_HighOC	CHO	0.0645781	0.570847	0	0.185461	0	0
1473	C14H24O9N0S1	3	0.642857	1.71429	367.107	0	14	24	0	9	1	0	0	-0.285714	50	Aliphatic_HighOC	CHOS	0.202735	2.33017	0.153654	0	0	0.113627
1474	C14H24O9N2S0	4	0.642857	1.71429	363.141	0.142857	14	24	2	9	0	0	0	0	31	Peptide_like	CHON	0	0.556411	0	0	0	0
1475	C14H25O10N1S0	3	0.714286	1.78571	366.141	0.0714286	14	25	1	10	0	0	0	-0.142857	29	Peptide_like	CHON	0	0.402781	0	0	0	0
1476	C14H25O11N1S0	3	0.785714	1.78571	382.135	0.0714286	14	25	1	11	0	0	0	0	20	Peptide_like	CHON	0	0.250381	0	0	0	0
1477	C14H25O7N1S0	3	0.5	1.78571	318.156	0.0714286	14	25	1	7	0	0	0	-0.571429	19	Peptide_like	CHON	0	0.137203	0	0	0	0
1478	C14H25O8N1S0	3	0.571429	1.78571	334.151	0.0714286	14	25	1	8	0	0	0	-0.428571	26	Peptide_like	CHON	0	0.256641	0	0	0	0
1479	C14H25O9N1S0	3	0.642857	1.78571	350.146	0.0714286	14	25	1	9	0	0	0	-0.285714	31	Peptide_like	CHON	0	0.435996	0	0	0	0
1480	C14H26O10N0S0	2	0.714286	1.85714	353.145	0	14	26	0	10	0	0	0	-0.428571	22	Aliphatic_HighOC	CHO	0	0.221472	0	0	0	0
1481	C14H26O10N0S1	2	0.714286	1.85714	385.117	0	14	26	0	10	1	0	0	-0.285714	15	Aliphatic_HighOC	CHOS	0	0.232037	0	0	0	0
1482	C14H26O6N0S0	2	0.428571	1.85714	289.166	0	14	26	0	6	0	0	0	-1	23	Aliphatic_LowOC	CHO	0	0.153666	0	0	0	0
1483	C14H26O6N0S1	2	0.428571	1.85714	321.138	0	14	26	0	6	1	0	0	-0.857143	38	Aliphatic_LowOC	CHOS	0	0.345142	0	0	0	0
1484	C14H26O7N0S1	2	0.5	1.85714	337.133	0	14	26	0	7	1	0	0	-0.714286	61	Aliphatic_HighOC	CHOS	0.107025	0.986039	0.0628206	0	0	0
1485	C14H26O7N2S0	3	0.5	1.85714	333.167	0.142857	14	26	2	7	0	0	0	-0.428571	10	Peptide_like	CHON	0	0.20519	0	0	0	0
1486	C14H26O8N0S0	2	0.571429	1.85714	321.155	0	14	26	0	8	0	0	0	-0.714286	20	Aliphatic_HighOC	CHO	0	0.219373	0	0	0	0
1487	C14H26O8N0S1	2	0.571429	1.85714	353.128	0	14	26	0	8	1	0	0	-0.571429	39	Aliphatic_HighOC	CHOS	0	0.982999	0	0	0	0
1488	C14H26O9N0S0	2	0.642857	1.85714	337.15	0	14	26	0	9	0	0	0	-0.571429	20	Aliphatic_HighOC	CHO	0	0.203634	0	0	0	0
1489	C14H26O9N0S1	2	0.642857	1.85714	369.122	0	14	26	0	9	1	0	0	-0.428571	33	Aliphatic_HighOC	CHOS	0	1.12487	0	0	0	0
1490	C14H28O13N2S0	2	0.928571	2	431.152	0.142857	14	28	2	13	0	0	0	0.285714	2	Sugars_w_X	CHON	0	0	0	0.139722	0	0
1491	C14H28O14N2S0	2	1	2	447.147	0.142857	14	28	2	14	0	0	0	0.428571	5	Sugars_w_X	CHON	0	0	0	0.163593	0.0917118	0.0913168
1492	C14H28O6N0S1	1	0.428571	2	323.153	0	14	28	0	6	1	0	0	-1	30	Aliphatic_LowOC	CHOS	0	0.156343	0	0	0	0
1493	C14H28O7N0S1	1	0.5	2	339.148	0	14	28	0	7	1	0	0	-0.857143	26	Aliphatic_HighOC	CHOS	0	0.135575	0	0	0	0
1494	C14H28O8N0S1	1	0.571429	2	355.143	0	14	28	0	8	1	0	0	-0.714286	14	Aliphatic_HighOC	CHOS	0	0.165823	0	0	0	0
1495	C14H30O13N2S0	1	0.928571	2.14286	433.168	0.142857	14	30	2	13	0	0	0	0.142857	1	Sugars_w_X	CHON	0	0	0	0.138971	0	0
1496	C14H30O14N2S0	1	1	2.14286	449.162	0.142857	14	30	2	14	0	0	0	0.285714	5	Sugars_w_X	CHON	0	0	0	0.2625	0.117879	0.104102
1497	C14H32O13N2S0	0	0.928571	2.28571	435.183	0.142857	14	32	2	13	0	0	0	0	3	Sugars_w_X	CHON	0	0	0	0.123029	0.0923211	0
1498	C14H32O14N2S0	0	1	2.28571	451.178	0.142857	14	32	2	14	0	0	0	0.142857	4	Sugars_w_X	CHON	0	0	0	0.221268	0	0
1499	C14H6O10N0S0	12	0.714286	0.428571	332.989	0	14	6	0	10	0	0.5	0.777778	1	60	Condensed_aromatics	CHO	0.279263	0	0.264873	0	0.119225	0.112484
1500	C14H6O10N2S0	13	0.714286	0.428571	360.995	0.142857	14	6	2	10	0	0.5	0.857143	1.42857	39	Condensed_aromatics.X	CHON	0	0	0.0780944	0	0	0.0784046
1501	C14H6O11N0S0	12	0.785714	0.428571	348.984	0	14	6	0	11	0	0.333333	0.764706	1.14286	53	Condensed_aromatics	CHO	0.0988563	0	0.112775	0	0	0
1502	C14H6O2N0S0	12	0.142857	0.428571	205.03	0	14	6	0	2	0	0.833333	0.846154	-0.142857	30	Condensed_aromatics	CHO	0.0932139	0	0.0692965	0	0	0
1503	C14H6O2N2S0	13	0.142857	0.428571	233.036	0.142857	14	6	2	2	0	0.9	0.909091	0.285714	14	Condensed_aromatics.X	CHON	0.0844855	0	0	0	0	0
1504	C14H6O3N0S0	12	0.214286	0.428571	221.024	0	14	6	0	3	0	0.818182	0.84	0	61	Condensed_aromatics	CHO	0.282879	0	0.22491	0	0.101781	0.109013
1505	C14H6O3N2S0	13	0.214286	0.428571	249.031	0.142857	14	6	2	3	0	0.888889	0.904762	0.428571	42	Condensed_aromatics.X	CHON	0.0957704	0	0	0	0	0
1506	C14H6O4N0S0	12	0.285714	0.428571	237.019	0	14	6	0	4	0	0.8	0.833333	0.142857	78	Condensed_aromatics	CHO	0.989229	0.273863	0.78431	0.282532	0.319228	0.371109
1507	C14H6O4N2S0	13	0.285714	0.428571	265.025	0.142857	14	6	2	4	0	0.875	0.9	0.571429	60	Condensed_aromatics.X	CHON	0.273833	0	0.148563	0	0	0.10516
1508	C14H6O5N0S0	12	0.357143	0.428571	253.014	0	14	6	0	5	0	0.777778	0.826087	0.285714	78	Condensed_aromatics	CHO	1.51364	0.446742	1.13938	0.48452	0.467955	0.495786
1509	C14H6O5N0S1	12	0.357143	0.428571	284.986	0	14	6	0	5	1	0.75	0.809524	0.428571	39	Condensed_aromatics.X	CHOS	0.319638	0	0.142257	0	0	0
1510	C14H6O5N2S0	13	0.357143	0.428571	281.02	0.142857	14	6	2	5	0	0.857143	0.894737	0.714286	68	Condensed_aromatics.X	CHON	0.521783	0.163761	0.214685	0.141976	0.161362	0.188645
1511	C14H6O6N0S0	12	0.428571	0.428571	269.009	0	14	6	0	6	0	0.75	0.818182	0.428571	78	Condensed_aromatics	CHO	1.46447	0.377996	1.11795	0.767052	0.519423	0.482832
1512	C14H6O6N0S1	12	0.428571	0.428571	300.981	0	14	6	0	6	1	0.714286	0.8	0.571429	64	Condensed_aromatics.X	CHOS	0.320636	0	0.137358	0	0	0
1513	C14H6O6N2S0	13	0.428571	0.428571	297.015	0.142857	14	6	2	6	0	0.833333	0.888889	0.857143	63	Condensed_aromatics.X	CHON	0.420945	0	0.17044	0.150656	0.173194	0.171372
1514	C14H6O7N0S0	12	0.5	0.428571	285.004	0	14	6	0	7	0	0.714286	0.809524	0.571429	78	Condensed_aromatics	CHO	1.26054	0.324989	1.04358	0.539524	0.502299	0.484229
1515	C14H6O7N0S1	12	0.5	0.428571	316.976	0	14	6	0	7	1	0.666667	0.789474	0.714286	67	Condensed_aromatics.X	CHOS	0.384867	0.171142	0.190869	0	0	0.080479
1516	C14H6O7N2S0	13	0.5	0.428571	313.01	0.142857	14	6	2	7	0	0.8	0.882353	1	61	Condensed_aromatics.X	CHON	0.342465	0	0.144323	0	0	0.139198
1517	C14H6O8N0S0	12	0.571429	0.428571	300.999	0	14	6	0	8	0	0.666667	0.8	0.714286	78	Condensed_aromatics	CHO	1.06234	0.403722	0.849836	0.375263	0.417193	0.366114
1518	C14H6O8N0S1	12	0.571429	0.428571	332.971	0	14	6	0	8	1	0.6	0.777778	0.857143	56	Condensed_aromatics.X	CHOS	0.303996	0	0.167202	0	0	0
1519	C14H6O8N2S0	13	0.571429	0.428571	329.005	0.142857	14	6	2	8	0	0.75	0.875	1.14286	66	Condensed_aromatics.X	CHON	0.451956	0	0.144899	0	0.137183	0.104314
1520	C14H6O9N0S0	12	0.642857	0.428571	316.994	0	14	6	0	9	0	0.6	0.789474	0.857143	78	Condensed_aromatics	CHO	0.679272	0.1651	0.550815	0.173108	0.277156	0.25219
1521	C14H6O9N0S1	12	0.642857	0.428571	348.966	0	14	6	0	9	1	0.5	0.764706	1	52	Condensed_aromatics.X	CHOS	0.193507	0	0.100867	0	0	0
1522	C14H6O9N2S0	13	0.642857	0.428571	345	0.142857	14	6	2	9	0	0.666667	0.866667	1.28571	59	Condensed_aromatics.X	CHON	0.251989	0	0.0893633	0	0	0.0914861
1523	C14H7O10N1S0	12	0.714286	0.5	348	0.0714286	14	7	1	10	0	0.333333	0.75	1.14286	65	Condensed_aromatics.X	CHON	0.251308	0	0.210574	0	0.13311	0.152152
1524	C14H7O11N1S0	12	0.785714	0.5	363.995	0.0714286	14	7	1	11	0	0	0.733333	1.28571	42	Condensed_aromatics.X	CHON	0	0	0.0606691	0	0	0
1525	C14H7O2N1S0	12	0.142857	0.5	220.04	0.0714286	14	7	1	2	0	0.818182	0.833333	0	31	Condensed_aromatics.X	CHON	0.364354	0	0.237436	0	0.148278	0.13797
1526	C14H7O3N1S0	12	0.214286	0.5	236.035	0.0714286	14	7	1	3	0	0.8	0.826087	0.142857	70	Condensed_aromatics.X	CHON	0.826778	0.211702	0.564704	0.221519	0.325545	0.347021
1527	C14H7O4N1S0	12	0.285714	0.5	252.03	0.0714286	14	7	1	4	0	0.777778	0.818182	0.285714	78	Condensed_aromatics.X	CHON	0.944725	0.295464	0.664676	0.283617	0.377654	0.389991
1528	C14H7O5N1S0	12	0.357143	0.5	268.025	0.0714286	14	7	1	5	0	0.75	0.809524	0.428571	78	Condensed_aromatics.X	CHON	1.10267	0.413961	0.734718	0.397715	0.398209	0.414418
1529	C14H7O6N1S0	12	0.428571	0.5	284.02	0.0714286	14	7	1	6	0	0.714286	0.8	0.571429	78	Condensed_aromatics.X	CHON	1.31286	0.383785	0.843594	0.453303	0.428224	0.482197
1530	C14H7O6N1S1	12	0.428571	0.5	315.992	0.0714286	14	7	1	6	1	0.666667	0.777778	0.714286	39	Condensed_aromatics.X	CHONS	0.307718	0	0.164007	0	0	0
1531	C14H7O7N1S0	12	0.5	0.5	300.015	0.0714286	14	7	1	7	0	0.666667	0.789474	0.714286	78	Condensed_aromatics.X	CHON	1.35466	0.367105	0.803567	0.38603	0.444546	0.436517
1532	C14H7O7N1S1	12	0.5	0.5	331.987	0.0714286	14	7	1	7	1	0.6	0.764706	0.857143	48	Condensed_aromatics.X	CHONS	0.360875	0	0.173614	0	0	0
1533	C14H7O8N1S0	12	0.571429	0.5	316.01	0.0714286	14	7	1	8	0	0.6	0.777778	0.857143	78	Condensed_aromatics.X	CHON	1.11991	0.357734	0.739298	0.329607	0.369284	0.363193
1534	C14H7O8N1S1	12	0.571429	0.5	347.982	0.0714286	14	7	1	8	1	0.5	0.75	1	48	Condensed_aromatics.X	CHONS	0.280262	0	0.139488	0	0	0
1535	C14H7O9N1S0	12	0.642857	0.5	332.005	0.0714286	14	7	1	9	0	0.5	0.764706	1	78	Condensed_aromatics.X	CHON	0.64746	0.220639	0.392858	0.143311	0.18849	0.197493
1536	C14H7O9N1S1	12	0.642857	0.5	363.977	0.0714286	14	7	1	9	1	0.333333	0.733333	1.14286	34	Condensed_aromatics.X	CHONS	0.103546	0	0.0725771	0	0	0
1537	C14H8O10N0S0	11	0.714286	0.571429	335.004	0	14	8	0	10	0	0.25	0.666667	0.857143	78	Condensed_aromatics	CHO	1.3639	0.665319	1.33811	0.373009	0.563707	0.636296
1538	C14H8O10N0S1	11	0.714286	0.571429	366.977	0	14	8	0	10	1	0	0.625	1	43	Polyphenolic_HighOC	CHOS	0.192327	0	0.128155	0	0	0
1539	C14H8O10N2S0	12	0.714286	0.571429	363.011	0.142857	14	8	2	10	0	0	0.714286	1.28571	55	Condensed_aromatics.X	CHON	0.135237	0	0.119251	0	0	0
1540	C14H8O11N0S0	11	0.785714	0.571429	350.999	0	14	8	0	11	0	0	0.647059	1	74	Polyphenolic_HighOC	CHO	0.412398	0	0.479004	0.175028	0.207827	0.244358
1541	C14H8O12N0S0	11	0.857143	0.571429	366.994	0	14	8	0	12	0	0	0.625	1.14286	54	Polyphenolic_HighOC	CHO	0.115738	0	0.171654	0	0	0
1542	C14H8O13N0S0	11	0.928571	0.571429	382.989	0	14	8	0	13	0	0	0.6	1.28571	18	Sugars_wo_X	CHO	0	0	0.0634171	0	0	0
1543	C14H8O2N0S0	11	0.142857	0.571429	207.045	0	14	8	0	2	0	0.75	0.769231	-0.285714	74	Condensed_aromatics	CHO	0.695413	0.322999	0.543657	0.142393	0.260449	0.247914
1544	C14H8O2N2S0	12	0.142857	0.571429	235.051	0.142857	14	8	2	2	0	0.8	0.818182	0.142857	14	Condensed_aromatics.X	CHON	0.470275	0	0	0	0	0
1545	C14H8O3N0S0	11	0.214286	0.571429	223.04	0	14	8	0	3	0	0.727273	0.76	-0.142857	77	Condensed_aromatics	CHO	1.94114	0.702587	1.57245	0.587433	0.81088	0.820496
1546	C14H8O3N2S0	12	0.214286	0.571429	251.046	0.142857	14	8	2	3	0	0.777778	0.809524	0.285714	57	Condensed_aromatics.X	CHON	0.603727	0	0.368083	0	0.275168	0.332161
1547	C14H8O4N0S0	11	0.285714	0.571429	239.035	0	14	8	0	4	0	0.7	0.75	0	78	Condensed_aromatics	CHO	3.35139	1.39367	2.80984	1.17211	1.3516	1.33605
1548	C14H8O4N2S0	12	0.285714	0.571429	267.041	0.142857	14	8	2	4	0	0.75	0.8	0.428571	76	Condensed_aromatics.X	CHON	0.72833	0.197881	0.436698	0.263836	0.326764	0.377036
1549	C14H8O5N0S0	11	0.357143	0.571429	255.03	0	14	8	0	5	0	0.666667	0.73913	0.142857	78	Condensed_aromatics	CHO	4.22558	1.47891	3.59149	1.53302	1.41188	1.47817
1550	C14H8O5N0S1	11	0.357143	0.571429	287.002	0	14	8	0	5	1	0.625	0.714286	0.285714	51	Condensed_aromatics.X	CHOS	0.548573	0.219228	0.33581	0	0	0
1551	C14H8O5N2S0	12	0.357143	0.571429	283.036	0.142857	14	8	2	5	0	0.714286	0.789474	0.571429	78	Condensed_aromatics.X	CHON	1.0062	0.31493	0.566088	0.448295	0.382785	0.467041
1552	C14H8O6N0S0	11	0.428571	0.571429	271.025	0	14	8	0	6	0	0.625	0.727273	0.285714	78	Condensed_aromatics	CHO	4.06674	1.50952	3.29321	1.6709	1.44254	1.38148
1553	C14H8O6N0S1	11	0.428571	0.571429	302.997	0	14	8	0	6	1	0.571429	0.7	0.428571	67	Condensed_aromatics.X	CHOS	0.654328	0.217021	0.369212	0	0	0.166335
1554	C14H8O6N2S0	12	0.428571	0.571429	299.031	0.142857	14	8	2	6	0	0.666667	0.777778	0.714286	78	Condensed_aromatics.X	CHON	1.23352	0.274225	0.617832	0.429182	0.387434	0.438592
1555	C14H8O7N0S0	11	0.5	0.571429	287.02	0	14	8	0	7	0	0.571429	0.714286	0.428571	78	Condensed_aromatics	CHO	3.8659	1.19731	3.09725	1.50013	1.38988	1.29101
1556	C14H8O7N0S1	11	0.5	0.571429	318.992	0	14	8	0	7	1	0.5	0.684211	0.571429	74	Condensed_aromatics.X	CHOS	0.579433	0.242421	0.35151	0	0.12721	0.152152
1557	C14H8O7N2S0	12	0.5	0.571429	315.026	0.142857	14	8	2	7	0	0.6	0.764706	0.857143	78	Condensed_aromatics.X	CHON	1.31878	0.325894	0.622817	0.406562	0.437619	0.478133
1558	C14H8O8N0S0	11	0.571429	0.571429	303.015	0	14	8	0	8	0	0.5	0.7	0.571429	78	Condensed_aromatics	CHO	3.0737	0.862187	2.4973	0.909445	1.02964	0.980523
1559	C14H8O8N0S1	11	0.571429	0.571429	334.987	0	14	8	0	8	1	0.4	0.666667	0.714286	73	Condensed_aromatics.X	CHOS	0.514537	0.317499	0.33434	0	0.150587	0.170695
1560	C14H8O8N2S0	12	0.571429	0.571429	331.021	0.142857	14	8	2	8	0	0.5	0.75	1	78	Condensed_aromatics.X	CHON	0.929673	0.236777	0.523739	0.314666	0.31926	0.310697
1561	C14H8O9N0S0	11	0.642857	0.571429	319.01	0	14	8	0	9	0	0.4	0.684211	0.714286	78	Condensed_aromatics	CHO	2.19972	1.00891	2.07964	0.662552	0.851156	0.795815
1562	C14H8O9N0S1	11	0.642857	0.571429	350.982	0	14	8	0	9	1	0.25	0.647059	0.857143	63	Polyphenolic_HighOC	CHOS	0.40317	0.138759	0.241079	0	0.141416	0.129588
1563	C14H8O9N2S0	12	0.642857	0.571429	347.016	0.142857	14	8	2	9	0	0.333333	0.733333	1.14286	67	Condensed_aromatics.X	CHON	0.484298	0	0.305561	0.142727	0.154788	0.183142
1564	C14H9O10N1S0	11	0.714286	0.642857	350.015	0.0714286	14	9	1	10	0	0	0.625	1	76	Polyphenolic_HighOC	CHON	0.537969	0	0.51296	0.150906	0.26853	0.289445
1565	C14H9O10N1S1	11	0.714286	0.642857	381.987	0.0714286	14	9	1	10	1	0	0.571429	1.14286	24	Polyphenolic_HighOC	CHONS	0.0790246	0	0.0706812	0	0	0
1566	C14H9O11N1S0	11	0.785714	0.642857	366.01	0.0714286	14	9	1	11	0	0	0.6	1.14286	55	Polyphenolic_HighOC	CHON	0.147914	0	0.127303	0	0	0.115871
1567	C14H9O2N1S0	11	0.142857	0.642857	222.056	0.0714286	14	9	1	2	0	0.727273	0.75	-0.142857	32	Condensed_aromatics.X	CHON	0.623771	0	0.476001	0	0.29056	0.350281
1568	C14H9O3N1S0	11	0.214286	0.642857	238.051	0.0714286	14	9	1	3	0	0.7	0.73913	0	70	Condensed_aromatics.X	CHON	1.36544	0.545339	1.03734	0.457393	0.646601	0.694677
1569	C14H9O4N1S0	11	0.285714	0.642857	254.046	0.0714286	14	9	1	4	0	0.666667	0.727273	0.142857	78	Condensed_aromatics.X	CHON	1.96306	0.808565	1.42928	0.614893	0.740782	0.841029
1570	C14H9O5N1S0	11	0.357143	0.642857	270.041	0.0714286	14	9	1	5	0	0.625	0.714286	0.285714	78	Condensed_aromatics.X	CHON	2.15097	0.857519	1.51737	0.855776	0.893261	0.925064
1571	C14H9O6N1S0	11	0.428571	0.642857	286.036	0.0714286	14	9	1	6	0	0.571429	0.7	0.428571	78	Condensed_aromatics.X	CHON	2.29805	0.884186	1.59684	1.00017	0.924686	0.926207
1572	C14H9O6N1S1	11	0.428571	0.642857	318.008	0.0714286	14	9	1	6	1	0.5	0.666667	0.571429	39	Condensed_aromatics.X	CHONS	0.429401	0	0.249067	0	0	0
1573	C14H9O7N1S0	11	0.5	0.642857	302.031	0.0714286	14	9	1	7	0	0.5	0.684211	0.571429	78	Condensed_aromatics.X	CHON	2.15871	0.765327	1.61267	0.697608	0.718142	0.781633
1574	C14H9O7N1S1	11	0.5	0.642857	334.003	0.0714286	14	9	1	7	1	0.4	0.647059	0.714286	48	Polyphenolic_HighOC	CHONS	0.472181	0	0.325415	0	0	0
1575	C14H9O8N1S0	11	0.571429	0.642857	318.026	0.0714286	14	9	1	8	0	0.4	0.666667	0.714286	78	Condensed_aromatics.X	CHON	1.95345	0.726395	1.52263	0.592775	0.711921	0.736546
1576	C14H9O8N1S1	11	0.571429	0.642857	349.998	0.0714286	14	9	1	8	1	0.25	0.625	0.857143	48	Polyphenolic_HighOC	CHONS	0.380268	0	0.273693	0	0	0
1577	C14H9O9N1S0	11	0.642857	0.642857	334.02	0.0714286	14	9	1	9	0	0.25	0.647059	0.857143	78	Polyphenolic_HighOC	CHON	1.44317	0.555325	1.20137	0.408816	0.537893	0.606577
1578	C14H9O9N1S1	11	0.642857	0.642857	365.993	0.0714286	14	9	1	9	1	0	0.6	1	42	Polyphenolic_HighOC	CHONS	0.210828	0	0.166563	0	0	0
1579	C15H10O10N0S0	11	0.666667	0.666667	349.02	0	15	10	0	10	0	0.2	0.6	0.666667	78	Polyphenolic_HighOC	CHO	3.93748	1.76689	4.36359	1.26184	1.75606	1.60467
1580	C15H10O10N0S1	11	0.666667	0.666667	380.992	0	15	10	0	10	1	0	0.555556	0.8	51	Polyphenolic_HighOC	CHOS	0.350982	0	0.25582	0	0.189741	0.141653
1581	C15H10O10N2S0	12	0.666667	0.666667	377.026	0.133333	15	10	2	10	0	0	0.625	1.06667	70	Polyphenolic_HighOC	CHON	0.376728	0	0.306498	0.243554	0.281068	0.276279
1582	C15H10O11N0S0	11	0.733333	0.666667	365.015	0	15	10	0	11	0	0	0.578947	0.8	78	Polyphenolic_HighOC	CHO	1.62935	0.548885	2.03474	0.69068	0.961275	1.02053
1583	C15H10O11N0S1	11	0.733333	0.666667	396.987	0	15	10	0	11	1	0	0.529412	0.933333	28	Polyphenolic_HighOC	CHOS	0.157868	0	0.100462	0	0	0
1584	C15H10O11N2S0	12	0.733333	0.666667	393.021	0.133333	15	10	2	11	0	0	0.6	1.2	44	Polyphenolic_HighOC	CHON	0.0956645	0	0.0667189	0.118605	0	0.0801827
1585	C15H10O12N0S0	11	0.8	0.666667	381.01	0	15	10	0	12	0	0	0.555556	0.933333	78	Polyphenolic_HighOC	CHO	0.531192	0.24224	0.742216	0.40698	0.463465	0.477244
1586	C15H10O12N0S1	11	0.8	0.666667	412.982	0	15	10	0	12	1	0	0.5	1.06667	10	Highly_Unsaturated_and_Phenolic_HighOC	CHOS	0.0718694	0	0.0780944	0	0	0.079717
1587	C15H10O13N0S0	11	0.866667	0.666667	397.005	0	15	10	0	13	0	0	0.529412	1.06667	57	Polyphenolic_HighOC	CHO	0.132983	0	0.225485	0.180787	0.179736	0.168409
1588	C15H10O14N0S0	11	0.933333	0.666667	413	0	15	10	0	14	0	0	0.5	1.2	10	Sugars_wo_X	CHO	0	0	0.158426	0.12595	0.163414	0
1589	C15H10O15N0S0	11	1	0.666667	428.995	0	15	10	0	15	0	0	0.466667	1.33333	1	Sugars_wo_X	CHO	0	0	0	0	0.091808	0
1590	C15H10O2N0S0	11	0.133333	0.666667	221.061	0	15	10	0	2	0	0.692308	0.714286	-0.4	76	Condensed_aromatics	CHO	1.76211	0.982095	1.5602	0.575998	0.890214	0.894329
1591	C15H10O2N2S0	12	0.133333	0.666667	249.067	0.133333	15	10	2	2	0	0.727273	0.75	0	14	Condensed_aromatics.X	CHON	0.444906	0	0	0	0	0
1592	C15H10O3N0S0	11	0.2	0.666667	237.056	0	15	10	0	3	0	0.666667	0.703704	-0.266667	78	Condensed_aromatics	CHO	3.8737	1.88549	3.38569	1.3529	1.69661	1.80149
1593	C15H10O3N2S0	12	0.2	0.666667	265.062	0.133333	15	10	2	3	0	0.7	0.73913	0.133333	57	Condensed_aromatics.X	CHON	0.76878	0	0.532985	0	0.458912	0.488759
1594	C15H10O4N0S0	11	0.266667	0.666667	253.051	0	15	10	0	4	0	0.636364	0.692308	-0.133333	78	Condensed_aromatics	CHO	5.25179	2.54614	4.59496	2.23088	2.11726	2.21319
1595	C15H10O4N2S0	12	0.266667	0.666667	281.057	0.133333	15	10	2	4	0	0.666667	0.727273	0.266667	76	Condensed_aromatics.X	CHON	1.11365	0.360665	0.818841	0.552461	0.641566	0.695269
1596	C15H10O5N0S0	11	0.333333	0.666667	269.046	0	15	10	0	5	0	0.6	0.68	0	78	Condensed_aromatics	CHO	6.00072	2.93362	5.11158	2.88049	2.49854	2.53833
1597	C15H10O5N0S1	11	0.333333	0.666667	301.018	0	15	10	0	5	1	0.555556	0.652174	0.133333	51	Polyphenolic_LowOC	CHOS	0.6076	0.281389	0.40581	0	0	0
1598	C15H10O5N2S0	12	0.333333	0.666667	297.052	0.133333	15	10	2	5	0	0.625	0.714286	0.4	78	Condensed_aromatics.X	CHON	1.32053	0.455498	0.865621	0.665974	0.709612	0.751279
1599	C15H10O6N0S0	11	0.4	0.666667	285.04	0	15	10	0	6	0	0.555556	0.666667	0.133333	78	Condensed_aromatics	CHO	7.17381	2.81599	6.0079	3.25542	2.89207	2.69789
1600	C15H10O6N0S1	11	0.4	0.666667	317.013	0	15	10	0	6	1	0.5	0.636364	0.266667	67	Polyphenolic_LowOC	CHOS	0.734502	0.387512	0.479814	0	0	0.171626
1601	C15H10O6N2S0	12	0.4	0.666667	313.047	0.133333	15	10	2	6	0	0.571429	0.7	0.533333	78	Condensed_aromatics.X	CHON	1.82982	0.455498	1.05276	0.759289	0.826401	0.881332
1602	C15H10O7N0S0	11	0.466667	0.666667	301.035	0	15	10	0	7	0	0.5	0.652174	0.266667	78	Polyphenolic_LowOC	CHO	7.07766	2.48568	5.90271	2.53494	2.41552	2.25697
1603	C15H10O7N0S1	11	0.466667	0.666667	333.007	0	15	10	0	7	1	0.428571	0.619048	0.4	75	Polyphenolic_LowOC	CHOS	0.871796	0.411935	0.554138	0.164595	0.232486	0.192921
1604	C15H10O7N2S0	12	0.466667	0.666667	329.042	0.133333	15	10	2	7	0	0.5	0.684211	0.666667	78	Condensed_aromatics.X	CHON	1.66539	0.422464	1.0229	0.780239	0.763902	0.750432
1605	C15H10O8N0S0	11	0.533333	0.666667	317.03	0	15	10	0	8	0	0.428571	0.636364	0.4	78	Polyphenolic_HighOC	CHO	6.79734	2.74934	6.06314	2.11544	2.42382	2.17386
1606	C15H10O8N0S1	11	0.533333	0.666667	349.002	0	15	10	0	8	1	0.333333	0.6	0.533333	74	Polyphenolic_HighOC	CHOS	0.820303	0.409764	0.525763	0	0.25814	0.195419
1607	C15H10O8N2S0	12	0.533333	0.666667	345.036	0.133333	15	10	2	8	0	0.4	0.666667	0.8	78	Condensed_aromatics.X	CHON	1.48831	0.353283	0.972942	0.64636	0.671869	0.685236
1608	C15H10O9N0S0	11	0.6	0.666667	333.025	0	15	10	0	9	0	0.333333	0.619048	0.533333	78	Polyphenolic_HighOC	CHO	6.18745	2.48532	5.8361	1.81931	2.16421	2.15583
1609	C15H10O9N0S1	11	0.6	0.666667	364.997	0	15	10	0	9	1	0.2	0.578947	0.666667	72	Polyphenolic_HighOC	CHOS	0.573306	0.276903	0.405256	0.187631	0.189805	0.178993
1610	C15H10O9N2S0	12	0.6	0.666667	361.031	0.133333	15	10	2	9	0	0.25	0.647059	0.933333	78	Polyphenolic_HighOC	CHON	0.913245	0.211558	0.695287	0.426344	0.535392	0.475381
1611	C15H11O10N1S0	11	0.666667	0.733333	364.031	0.0666667	15	11	1	10	0	0	0.555556	0.8	78	Polyphenolic_HighOC	CHON	1.21771	0.538898	1.26527	0.643856	0.779006	0.905971
1612	C15H11O10N1S1	11	0.666667	0.733333	396.003	0.0666667	15	11	1	10	1	0	0.5	0.933333	33	Highly_Unsaturated_and_Phenolic_HighOC	CHONS	0.138202	0	0.126323	0	0	0
1613	C15H11O11N1S0	11	0.733333	0.733333	380.026	0.0666667	15	11	1	11	0	0	0.529412	0.933333	78	Polyphenolic_HighOC	CHON	0.4435	0.184493	0.489315	0.405811	0.404206	0.435755
1614	C15H11O11N1S1	11	0.733333	0.733333	411.998	0.0666667	15	11	1	11	1	0	0.466667	1.06667	21	Highly_Unsaturated_and_Phenolic_HighOC	CHONS	0.111911	0	0.0814389	0	0	0
1615	C15H11O12N1S0	11	0.8	0.733333	396.021	0.0666667	15	11	1	12	0	0	0.5	1.06667	55	Highly_Unsaturated_and_Phenolic_HighOC	CHON	0.092518	0	0.130626	0	0.138402	0.137335
1616	C15H11O13N1S0	11	0.866667	0.733333	412.016	0.0666667	15	11	1	13	0	0	0.466667	1.2	3	Highly_Unsaturated_and_Phenolic_HighOC	CHON	0	0	0	0	0.103961	0
1617	C15H11O2N1S0	11	0.133333	0.733333	236.072	0.0666667	15	11	1	2	0	0.666667	0.692308	-0.266667	33	Condensed_aromatics.X	CHON	0.855988	0	0.661076	0	0.456667	0.529824
1618	C15H11O3N1S0	11	0.2	0.733333	252.067	0.0666667	15	11	1	3	0	0.636364	0.68	-0.133333	70	Condensed_aromatics.X	CHON	1.36196	0.761202	1.09087	0.632254	0.75813	0.839039
1619	C15H11O4N1S0	11	0.266667	0.733333	268.062	0.0666667	15	11	1	4	0	0.6	0.666667	0	78	Condensed_aromatics.X	CHON	1.96227	1.06958	1.59165	1.1045	1.05222	1.15812
1620	C15H11O5N1S0	11	0.333333	0.733333	284.056	0.0666667	15	11	1	5	0	0.555556	0.652174	0.133333	78	Polyphenolic_LowOC	CHON	2.66784	1.10218	2.07176	1.44722	1.3869	1.3681
1621	C15H11O6N1S0	11	0.4	0.733333	300.051	0.0666667	15	11	1	6	0	0.5	0.636364	0.266667	78	Polyphenolic_LowOC	CHON	2.89883	1.09592	2.18865	1.39113	1.22259	1.33055
1622	C15H11O6N1S1	11	0.4	0.733333	332.023	0.0666667	15	11	1	6	1	0.428571	0.6	0.4	39	Polyphenolic_LowOC	CHONS	0.48457	0	0.355131	0	0	0
1623	C15H11O7N1S0	11	0.466667	0.733333	316.046	0.0666667	15	11	1	7	0	0.428571	0.619048	0.4	78	Polyphenolic_LowOC	CHON	3.26001	1.3064	2.53313	1.32477	1.44299	1.40519
1624	C15H11O7N1S1	11	0.466667	0.733333	348.018	0.0666667	15	11	1	7	1	0.333333	0.578947	0.533333	48	Polyphenolic_LowOC	CHONS	0.484585	0	0.381269	0	0	0
1625	C15H11O8N1S0	11	0.533333	0.733333	332.041	0.0666667	15	11	1	8	0	0.333333	0.6	0.533333	78	Polyphenolic_HighOC	CHON	3.41388	1.31273	2.75331	1.36767	1.3759	1.38465
1626	C15H11O8N1S1	11	0.533333	0.733333	364.013	0.0666667	15	11	1	8	1	0.2	0.555556	0.666667	48	Polyphenolic_HighOC	CHONS	0.400402	0	0.286921	0	0	0
1627	C15H11O9N1S0	11	0.6	0.733333	348.036	0.0666667	15	11	1	9	0	0.2	0.578947	0.666667	78	Polyphenolic_HighOC	CHON	2.70223	1.16315	2.37679	1.00835	1.25344	1.24673
1628	C15H11O9N1S1	11	0.6	0.733333	380.008	0.0666667	15	11	1	9	1	0	0.529412	0.8	43	Polyphenolic_HighOC	CHONS	0.305237	0	0.230108	0	0	0
1629	C15H12O10N0S0	10	0.666667	0.8	351.036	0	15	12	0	10	0	0	0.5	0.533333	78	Highly_Unsaturated_and_Phenolic_HighOC	CHO	8.39556	6.47731	10.4033	3.85354	5.07971	5.0941
1630	C15H12O10N0S1	10	0.666667	0.8	383.008	0	15	12	0	10	1	0	0.444444	0.666667	61	Highly_Unsaturated_and_Phenolic_HighOC	CHOS	0.533854	0.376114	0.468439	0	0.314899	0.267727
1631	C15H12O10N2S0	11	0.666667	0.8	379.042	0.133333	15	12	2	10	0	0	0.5	0.933333	78	Highly_Unsaturated_and_Phenolic_HighOC	CHON	0.531873	0.222593	0.519841	0.510644	0.627296	0.670461
1632	C15H12O11N0S0	10	0.733333	0.8	367.031	0	15	12	0	11	0	0	0.473684	0.666667	78	Highly_Unsaturated_and_Phenolic_HighOC	CHO	4.6754	2.47555	6.81592	2.94401	3.46507	3.95757
1633	C15H12O11N0S1	10	0.733333	0.8	399.003	0	15	12	0	11	1	0	0.411765	0.8	45	Highly_Unsaturated_and_Phenolic_HighOC	CHOS	0.296962	0.186954	0.266876	0	0.148599	0.182972
1634	C15H12O11N2S0	11	0.733333	0.8	395.037	0.133333	15	12	2	11	0	0	0.466667	1.06667	57	Highly_Unsaturated_and_Phenolic_HighOC	CHON	0.18254	0	0.153185	0.172858	0.182622	0.228059
1635	C15H12O12N0S0	10	0.8	0.8	383.026	0	15	12	0	12	0	0	0.444444	0.8	78	Highly_Unsaturated_and_Phenolic_HighOC	CHO	1.55673	0.682542	2.47516	1.62625	1.81657	1.95863
1636	C15H12O12N0S1	10	0.8	0.8	414.998	0	15	12	0	12	1	0	0.375	0.933333	26	Highly_Unsaturated_and_Phenolic_HighOC	CHOS	0.159002	0	0.133587	0	0.09944	0.104017
1637	C15H12O12N2S0	11	0.8	0.8	411.032	0.133333	15	12	2	12	0	0	0.428571	1.2	9	Highly_Unsaturated_and_Phenolic_HighOC	CHON	0	0	0.0594335	0	0	0.0929255
1638	C15H12O13N0S0	10	0.866667	0.8	399.021	0	15	12	0	13	0	0	0.411765	0.933333	77	Highly_Unsaturated_and_Phenolic_HighOC	CHO	0.479154	0.190065	0.75078	0.575915	0.552676	0.583759
1639	C15H12O14N0S0	10	0.933333	0.8	415.015	0	15	12	0	14	0	0	0.375	1.06667	57	Sugars_wo_X	CHO	0.224851	0	0.391835	0.35281	0.327373	0.20143
1640	C15H12O15N0S0	10	1	0.8	431.01	0	15	12	0	15	0	0	0.333333	1.2	9	Sugars_wo_X	CHO	0	0	0.138849	0.178867	0.157513	0.0940686
1641	C15H12O2N0S0	10	0.133333	0.8	223.076	0	15	12	0	2	0	0.615385	0.642857	-0.533333	76	Polyphenolic_LowOC	CHO	1.81763	1.30296	1.72666	0.88115	1.34005	1.44744
1642	C15H12O2N2S0	11	0.133333	0.8	251.083	0.133333	15	12	2	2	0	0.636364	0.666667	-0.133333	14	Condensed_aromatics.X	CHON	0.42034	0	0	0	0	0
1643	C15H12O3N0S0	10	0.2	0.8	239.071	0	15	12	0	3	0	0.583333	0.62963	-0.4	78	Polyphenolic_LowOC	CHO	3.32597	2.54387	3.2851	2.03365	2.22074	2.48566
1644	C15H12O3N2S0	11	0.2	0.8	267.078	0.133333	15	12	2	3	0	0.6	0.652174	0	57	Polyphenolic_LowOC	CHON	0.807808	0	0.674986	0	0.617901	0.712415
1645	C15H12O4N0S0	10	0.266667	0.8	255.066	0	15	12	0	4	0	0.545455	0.615385	-0.266667	78	Polyphenolic_LowOC	CHO	4.83007	3.1014	4.71783	2.95403	2.56126	3.02251
1646	C15H12O4N2S0	11	0.266667	0.8	283.072	0.133333	15	12	2	4	0	0.555556	0.636364	0.133333	76	Polyphenolic_LowOC	CHON	1.25078	0.515308	0.982102	0.944918	0.97221	1.04648
1647	C15H12O5N0S0	10	0.333333	0.8	271.061	0	15	12	0	5	0	0.5	0.6	-0.133333	78	Polyphenolic_LowOC	CHO	5.55986	3.62264	5.49006	3.73518	2.97884	3.23652
1648	C15H12O5N0S1	10	0.333333	0.8	303.033	0	15	12	0	5	1	0.444444	0.565217	0	51	Polyphenolic_LowOC	CHOS	0.5357	0.345975	0.382398	0	0	0
1649	C15H12O5N2S0	11	0.333333	0.8	299.067	0.133333	15	12	2	5	0	0.5	0.619048	0.266667	78	Polyphenolic_LowOC	CHON	1.4412	0.541323	1.12623	1.03256	1.01345	1.12268
1650	C15H12O6N0S0	10	0.4	0.8	287.056	0	15	12	0	6	0	0.444444	0.583333	0	78	Polyphenolic_LowOC	CHO	7.5655	4.20702	7.42284	4.49956	3.71651	3.73345
1651	C15H12O6N0S1	10	0.4	0.8	319.028	0	15	12	0	6	1	0.375	0.545455	0.133333	67	Polyphenolic_LowOC	CHOS	0.695943	0.526633	0.498709	0	0	0.227212
1652	C15H12O6N2S0	11	0.4	0.8	315.062	0.133333	15	12	2	6	0	0.428571	0.6	0.4	78	Polyphenolic_LowOC	CHON	1.89986	0.775964	1.47928	1.25032	1.29977	1.37259
1653	C15H12O7N0S0	10	0.466667	0.8	303.051	0	15	12	0	7	0	0.375	0.565217	0.133333	78	Polyphenolic_LowOC	CHO	9.25666	4.40313	8.98311	4.07789	3.78077	3.80931
1654	C15H12O7N0S1	10	0.466667	0.8	335.023	0	15	12	0	7	1	0.285714	0.52381	0.266667	75	Polyphenolic_LowOC	CHOS	0.849741	0.771623	0.579701	0.307822	0.331413	0.350577
1655	C15H12O7N2S0	11	0.466667	0.8	331.057	0.133333	15	12	2	7	0	0.333333	0.578947	0.533333	78	Polyphenolic_LowOC	CHON	2.19373	0.749551	1.68082	1.41758	1.39533	1.40895
1656	C15H12O8N0S0	10	0.533333	0.8	319.046	0	15	12	0	8	0	0.285714	0.545455	0.266667	78	Polyphenolic_HighOC	CHO	10.5631	6.40049	10.2031	4.13064	4.18552	4.27915
1657	C15H12O8N0S1	10	0.533333	0.8	351.018	0	15	12	0	8	1	0.166667	0.5	0.4	75	Highly_Unsaturated_and_Phenolic_HighOC	CHOS	0.89665	0.730339	0.639219	0.28971	0.393752	0.350238
1658	C15H12O8N2S0	11	0.533333	0.8	347.052	0.133333	15	12	2	8	0	0.2	0.555556	0.666667	78	Polyphenolic_HighOC	CHON	2.07603	0.748213	1.66261	1.28162	1.35506	1.42644
1659	C15H12O9N0S0	10	0.6	0.8	335.041	0	15	12	0	9	0	0.166667	0.52381	0.4	78	Polyphenolic_HighOC	CHO	10.2389	7.43694	11.2836	4.18965	4.96854	5.09469
1660	C15H12O9N0S1	10	0.6	0.8	367.013	0	15	12	0	9	1	0	0.473684	0.533333	72	Highly_Unsaturated_and_Phenolic_HighOC	CHOS	0.825447	0.617161	0.608438	0.255072	0.361717	0.313364
1661	C15H12O9N2S0	11	0.6	0.8	363.047	0.133333	15	12	2	9	0	0	0.529412	0.8	78	Polyphenolic_HighOC	CHON	1.23626	0.442617	1.0929	0.881066	1.03314	1.09567
1662	C15H13O10N1S0	10	0.666667	0.866667	366.047	0.0666667	15	13	1	10	0	0	0.444444	0.666667	78	Highly_Unsaturated_and_Phenolic_HighOC	CHON	1.91545	1.31414	2.28902	1.59478	1.79338	2.33516
1663	C15H13O10N1S1	10	0.666667	0.866667	398.019	0.0666667	15	13	1	10	1	0	0.375	0.8	35	Highly_Unsaturated_and_Phenolic_HighOC	CHONS	0.221296	0	0.165775	0	0	0
1664	C15H13O11N1S0	10	0.733333	0.866667	382.042	0.0666667	15	13	1	11	0	0	0.411765	0.8	78	Highly_Unsaturated_and_Phenolic_HighOC	CHON	0.700723	0.444499	0.980185	0.91103	1.02294	1.28144
1665	C15H13O11N1S1	10	0.733333	0.866667	414.014	0.0666667	15	13	1	11	1	0	0.333333	0.933333	26	Highly_Unsaturated_and_Phenolic_HighOC	CHONS	0.133271	0	0.123085	0	0	0
1666	C15H13O12N1S0	10	0.8	0.866667	398.036	0.0666667	15	13	1	12	0	0	0.375	0.933333	69	Highly_Unsaturated_and_Phenolic_HighOC	CHON	0.185036	0	0.274949	0.305318	0.271833	0.390245
1667	C15H13O13N1S0	10	0.866667	0.866667	414.031	0.0666667	15	13	1	13	0	0	0.333333	1.06667	15	Highly_Unsaturated_and_Phenolic_HighOC	CHON	0.0909751	0	0.125897	0.147568	0.162291	0.178993
1668	C15H13O14N1S0	10	0.933333	0.866667	430.026	0.0666667	15	13	1	14	0	0	0.285714	1.2	1	Sugars_w_X	CHON	0	0	0	0	0.108258	0
1669	C15H13O2N1S0	10	0.133333	0.866667	238.087	0.0666667	15	13	1	2	0	0.583333	0.615385	-0.4	33	Polyphenolic_LowOC	CHON	0.568163	0	0.565428	0	0.514452	0.587865
1670	C15H13O3N1S0	10	0.2	0.866667	254.082	0.0666667	15	13	1	3	0	0.545455	0.6	-0.266667	70	Polyphenolic_LowOC	CHON	1.05561	0.824413	0.988152	0.765132	0.769353	0.955334
1671	C15H13O4N1S0	10	0.266667	0.866667	270.077	0.0666667	15	13	1	4	0	0.5	0.583333	-0.133333	78	Polyphenolic_LowOC	CHON	1.49071	1.1396	1.40461	1.28613	1.11436	1.3427
1672	C15H13O5N1S0	10	0.333333	0.866667	286.072	0.0666667	15	13	1	5	0	0.444444	0.565217	0	78	Polyphenolic_LowOC	CHON	2.20913	1.40771	2.05397	1.78701	1.51196	1.69882
1673	C15H13O6N1S0	10	0.4	0.866667	302.067	0.0666667	15	13	1	6	0	0.375	0.545455	0.133333	78	Polyphenolic_LowOC	CHON	2.91544	1.53246	2.60008	1.76505	1.63061	1.77917
1674	C15H13O6N1S1	10	0.4	0.866667	334.039	0.0666667	15	13	1	6	1	0.285714	0.5	0.266667	39	Highly_Unsaturated_and_Phenolic_LowOC	CHONS	0.420279	0	0.299532	0	0	0
1675	C15H13O7N1S0	10	0.466667	0.866667	318.062	0.0666667	15	13	1	7	0	0.285714	0.52381	0.266667	78	Polyphenolic_LowOC	CHON	3.59138	2.41404	3.19235	2.12337	2.03273	2.21366
1676	C15H13O7N1S1	10	0.466667	0.866667	350.034	0.0666667	15	13	1	7	1	0.166667	0.473684	0.4	48	Highly_Unsaturated_and_Phenolic_LowOC	CHONS	0.472952	0	0.363503	0	0	0
1677	C15H13O8N1S0	10	0.533333	0.866667	334.057	0.0666667	15	13	1	8	0	0.166667	0.5	0.4	78	Highly_Unsaturated_and_Phenolic_HighOC	CHON	4.20462	2.75484	3.8325	2.39113	2.42126	2.76317
1678	C15H13O8N1S1	10	0.533333	0.866667	366.029	0.0666667	15	13	1	8	1	0	0.444444	0.533333	48	Highly_Unsaturated_and_Phenolic_HighOC	CHONS	0.444029	0	0.367146	0	0	0
1679	C15H13O9N1S0	10	0.6	0.866667	350.052	0.0666667	15	13	1	9	0	0	0.473684	0.533333	78	Highly_Unsaturated_and_Phenolic_HighOC	CHON	3.48061	2.75094	3.63965	2.31751	2.6176	2.9411
1680	C15H13O9N1S1	10	0.6	0.866667	382.024	0.0666667	15	13	1	9	1	0	0.411765	0.666667	43	Highly_Unsaturated_and_Phenolic_HighOC	CHONS	0.355807	0	0.299255	0	0	0
1681	C15H14O10N0S0	9	0.666667	0.933333	353.051	0	15	14	0	10	0	0	0.4	0.4	78	Highly_Unsaturated_and_Phenolic_HighOC	CHO	12.785	10.3212	15.544	9.04195	12.0776	13.5083
1682	C15H14O10N0S1	9	0.666667	0.933333	385.023	0	15	14	0	10	1	0	0.333333	0.533333	61	Highly_Unsaturated_and_Phenolic_HighOC	CHOS	0.670423	0.796407	0.608352	0	0.472989	0.466321
1683	C15H14O10N2S0	10	0.666667	0.933333	381.058	0.133333	15	14	2	10	0	0	0.375	0.8	78	Highly_Unsaturated_and_Phenolic_HighOC	CHON	0.773106	0.442798	0.829279	1.03748	1.0612	1.47157
1684	C15H14O11N0S0	9	0.733333	0.933333	369.046	0	15	14	0	11	0	0	0.368421	0.533333	78	Highly_Unsaturated_and_Phenolic_HighOC	CHO	8.50257	5.26108	12.4653	6.765	8.46067	10.9459
1685	C15H14O11N0S1	9	0.733333	0.933333	401.018	0	15	14	0	11	1	0	0.294118	0.666667	51	Highly_Unsaturated_and_Phenolic_HighOC	CHOS	0.440005	0.31616	0.402742	0	0.221936	0.311375
1686	C15H14O11N2S0	10	0.733333	0.933333	397.052	0.133333	15	14	2	11	0	0	0.333333	0.933333	75	Highly_Unsaturated_and_Phenolic_HighOC	CHON	0.258796	0.193177	0.24911	0.364078	0.392533	0.468395
1687	C15H14O12N0S0	9	0.8	0.933333	385.041	0	15	14	0	12	0	0	0.333333	0.666667	78	Highly_Unsaturated_and_Phenolic_HighOC	CHO	3.20664	2.027	5.79019	3.40908	4.0197	5.14109
1688	C15H14O12N0S1	9	0.8	0.933333	417.013	0	15	14	0	12	1	0	0.25	0.8	38	Highly_Unsaturated_and_Phenolic_HighOC	CHOS	0.186155	0.254434	0.215984	0	0.134714	0.180178
1689	C15H14O12N2S0	10	0.8	0.933333	413.047	0.133333	15	14	2	12	0	0	0.285714	1.06667	25	Highly_Unsaturated_and_Phenolic_HighOC	CHON	0.0858167	0	0.111624	0	0.0917439	0.13742
1690	C15H14O13N0S0	9	0.866667	0.933333	401.036	0	15	14	0	13	0	0	0.294118	0.8	78	Highly_Unsaturated_and_Phenolic_HighOC	CHO	0.896378	0.465774	1.6082	0.859115	0.977757	1.1875
1691	C15H14O13N0S1	9	0.866667	0.933333	433.008	0	15	14	0	13	1	0	0.2	0.933333	9	Highly_Unsaturated_and_Phenolic_HighOC	CHOS	0	0	0.0752399	0	0	0.0842468
1692	C15H14O14N0S0	9	0.933333	0.933333	417.031	0	15	14	0	14	0	0	0.25	0.933333	62	Sugars_wo_X	CHO	0.263516	0	0.473956	0.267007	0.242684	0.254307
1693	C15H14O15N0S0	9	1	0.933333	433.026	0	15	14	0	15	0	0	0.2	1.06667	10	Sugars_wo_X	CHO	0.0638671	0	0.108834	0	0	0
1694	C15H14O2N0S0	9	0.133333	0.933333	225.092	0	15	14	0	2	0	0.538462	0.571429	-0.666667	77	Polyphenolic_LowOC	CHO	1.23919	1.19687	1.27763	1.11018	1.26957	1.71487
1695	C15H14O2N2S0	10	0.133333	0.933333	253.098	0.133333	15	14	2	2	0	0.545455	0.583333	-0.266667	14	Polyphenolic_LowOC	CHON	0.38169	0	0	0	0	0
1696	C15H14O3N0S0	9	0.2	0.933333	241.087	0	15	14	0	3	0	0.5	0.555556	-0.533333	78	Polyphenolic_LowOC	CHO	2.5431	2.49325	2.77312	2.41016	2.2167	2.90533
1697	C15H14O3N2S0	10	0.2	0.933333	269.093	0.133333	15	14	2	3	0	0.5	0.565217	-0.133333	57	Polyphenolic_LowOC	CHON	0.667897	0	0.597659	0	0.645286	0.807627
1698	C15H14O4N0S0	9	0.266667	0.933333	257.082	0	15	14	0	4	0	0.454545	0.538462	-0.4	78	Polyphenolic_LowOC	CHO	3.87674	3.53041	4.18301	3.9754	2.99619	3.79115
1699	C15H14O4N2S0	10	0.266667	0.933333	285.088	0.133333	15	14	2	4	0	0.444444	0.545455	0	76	Polyphenolic_LowOC	CHON	1.17097	0.731062	1.06842	1.2287	1.04853	1.28529
1700	C15H14O5N0S0	9	0.333333	0.933333	273.077	0	15	14	0	5	0	0.4	0.52	-0.266667	78	Polyphenolic_LowOC	CHO	4.70674	4.19634	5.17587	4.81824	3.49364	4.19668
1701	C15H14O5N0S1	9	0.333333	0.933333	305.049	0	15	14	0	5	1	0.333333	0.478261	-0.133333	51	Highly_Unsaturated_and_Phenolic_LowOC	CHOS	0.404411	0.376404	0.357901	0	0	0
1702	C15H14O5N2S0	10	0.333333	0.933333	301.083	0.133333	15	14	2	5	0	0.375	0.52381	0.133333	78	Polyphenolic_LowOC	CHON	1.55034	0.749117	1.37132	1.4483	1.29686	1.51831
1703	C15H14O6N0S0	9	0.4	0.933333	289.072	0	15	14	0	6	0	0.333333	0.5	-0.133333	78	Highly_Unsaturated_and_Phenolic_LowOC	CHO	6.82314	5.70001	7.5851	5.99102	4.81564	5.15912
1704	C15H14O6N0S1	9	0.4	0.933333	321.044	0	15	14	0	6	1	0.25	0.454545	0	67	Highly_Unsaturated_and_Phenolic_LowOC	CHOS	0.564956	0.625663	0.449735	0	0	0.282756
1705	C15H14O6N2S0	10	0.4	0.933333	317.078	0.133333	15	14	2	6	0	0.285714	0.5	0.266667	78	Highly_Unsaturated_and_Phenolic_LowOC	CHON	2.16263	1.23562	1.85373	1.90937	1.73185	2.00021
1706	C15H14O7N0S0	9	0.466667	0.933333	305.067	0	15	14	0	7	0	0.25	0.478261	0	78	Highly_Unsaturated_and_Phenolic_LowOC	CHO	9.32777	8.44776	9.8171	6.30092	5.55097	6.16568
1707	C15H14O7N0S1	9	0.466667	0.933333	337.039	0	15	14	0	7	1	0.142857	0.428571	0.133333	75	Highly_Unsaturated_and_Phenolic_LowOC	CHOS	0.732898	0.96129	0.604347	0.433689	0.422355	0.422039
1708	C15H14O7N2S0	10	0.466667	0.933333	333.073	0.133333	15	14	2	7	0	0.166667	0.473684	0.4	78	Highly_Unsaturated_and_Phenolic_LowOC	CHON	2.6656	1.46147	2.3236	2.38704	2.13564	2.47529
1709	C15H14O8N0S0	9	0.533333	0.933333	321.062	0	15	14	0	8	0	0.142857	0.454545	0.133333	78	Highly_Unsaturated_and_Phenolic_HighOC	CHO	12.1896	13.3336	13.1898	7.24835	7.41769	8.20712
1710	C15H14O8N0S1	9	0.533333	0.933333	353.034	0	15	14	0	8	1	0	0.4	0.266667	75	Highly_Unsaturated_and_Phenolic_HighOC	CHOS	0.957507	1.14665	0.744773	0.408482	0.550399	0.524447
1711	C15H14O8N2S0	10	0.533333	0.933333	349.068	0.133333	15	14	2	8	0	0	0.444444	0.533333	78	Highly_Unsaturated_and_Phenolic_HighOC	CHON	2.61531	1.51499	2.34172	2.41425	2.50508	2.84225
1712	C15H14O9N0S0	9	0.6	0.933333	337.057	0	15	14	0	9	0	0	0.428571	0.266667	78	Highly_Unsaturated_and_Phenolic_HighOC	CHO	12.7955	15.8762	14.5673	9.10154	10.4139	11.5005
1713	C15H14O9N0S1	9	0.6	0.933333	369.029	0	15	14	0	9	1	0	0.368421	0.4	72	Highly_Unsaturated_and_Phenolic_HighOC	CHOS	0.996581	1.13638	0.790977	0.509059	0.502459	0.538418
1714	C15H14O9N2S0	10	0.6	0.933333	365.063	0.133333	15	14	2	9	0	0	0.411765	0.666667	78	Highly_Unsaturated_and_Phenolic_HighOC	CHON	1.61616	1.01303	1.62432	1.72224	1.81926	2.44146
1715	C15H15O10N1S0	9	0.666667	1	368.062	0.0666667	15	15	1	10	0	0	0.333333	0.533333	78	Highly_Unsaturated_and_Phenolic_HighOC	CHON	2.41361	2.26186	3.00774	2.75463	2.97791	4.17729
1716	C15H15O10N1S1	9	0.666667	1	400.034	0.0666667	15	15	1	10	1	0	0.25	0.666667	34	Highly_Unsaturated_and_Phenolic_HighOC	CHONS	0.248404	0	0.206548	0	0	0
1717	C15H15O11N1S0	9	0.733333	1	384.057	0.0666667	15	15	1	11	0	0	0.294118	0.666667	78	Highly_Unsaturated_and_Phenolic_HighOC	CHON	0.938069	0.86642	1.34083	1.31092	1.43744	1.98018
1718	C15H15O11N1S1	9	0.733333	1	416.029	0.0666667	15	15	1	11	1	0	0.2	0.8	27	Highly_Unsaturated_and_Phenolic_HighOC	CHONS	0.151575	0	0.139616	0	0	0
1719	C15H15O12N1S0	9	0.8	1	400.052	0.0666667	15	15	1	12	0	0	0.25	0.8	75	Highly_Unsaturated_and_Phenolic_HighOC	CHON	0.243699	0.185904	0.401081	0.374678	0.356875	0.532321
1720	C15H15O13N1S0	9	0.866667	1	416.047	0.0666667	15	15	1	13	0	0	0.2	0.933333	17	Highly_Unsaturated_and_Phenolic_HighOC	CHON	0	0	0.11646	0.161006	0.1452	0.169764
1721	C15H15O2N1S0	9	0.133333	1	240.103	0.0666667	15	15	1	2	0	0.5	0.538462	-0.533333	32	Polyphenolic_LowOC	CHON	0.387953	0	0.377179	0	0.373357	0.542059
1722	C15H15O3N1S0	9	0.2	1	256.098	0.0666667	15	15	1	3	0	0.454545	0.52	-0.4	70	Polyphenolic_LowOC	CHON	0.770368	0.789786	0.796346	0.755951	0.713493	0.989286
1723	C15H15O4N1S0	9	0.266667	1	272.093	0.0666667	15	15	1	4	0	0.4	0.5	-0.266667	78	Highly_Unsaturated_and_Phenolic_LowOC	CHON	1.13813	1.18888	1.09605	1.28237	0.976186	1.30769
1724	C15H15O5N1S0	9	0.333333	1	288.088	0.0666667	15	15	1	5	0	0.333333	0.478261	-0.133333	78	Highly_Unsaturated_and_Phenolic_LowOC	CHON	1.71364	1.77076	1.71296	1.93399	1.55625	1.88019
1725	C15H15O6N1S0	9	0.4	1	304.083	0.0666667	15	15	1	6	0	0.25	0.454545	0	78	Highly_Unsaturated_and_Phenolic_LowOC	CHON	2.54762	2.03522	2.47094	2.36392	1.93576	2.34714
1726	C15H15O6N1S1	9	0.4	1	336.055	0.0666667	15	15	1	6	1	0.142857	0.4	0.133333	39	Highly_Unsaturated_and_Phenolic_LowOC	CHONS	0.304178	0	0.238245	0	0	0
1727	C15H15O7N1S0	9	0.466667	1	320.078	0.0666667	15	15	1	7	0	0.142857	0.428571	0.133333	78	Highly_Unsaturated_and_Phenolic_LowOC	CHON	3.35311	3.86698	3.33503	2.98816	2.69084	3.18652
1728	C15H15O7N1S1	9	0.466667	1	352.05	0.0666667	15	15	1	7	1	0	0.368421	0.266667	48	Highly_Unsaturated_and_Phenolic_LowOC	CHONS	0.386304	0	0.324243	0	0	0
1729	C15H15O8N1S0	9	0.533333	1	336.072	0.0666667	15	15	1	8	0	0	0.4	0.266667	78	Highly_Unsaturated_and_Phenolic_HighOC	CHON	3.87302	4.69718	3.97178	3.98199	3.58882	4.51406
1730	C15H15O8N1S1	9	0.533333	1	368.045	0.0666667	15	15	1	8	1	0	0.333333	0.4	48	Highly_Unsaturated_and_Phenolic_HighOC	CHONS	0.418222	0	0.354663	0	0	0
1731	C15H15O9N1S0	9	0.6	1	352.067	0.0666667	15	15	1	9	0	0	0.368421	0.4	78	Highly_Unsaturated_and_Phenolic_HighOC	CHON	3.72325	3.8888	4.10294	3.80947	4.20355	5.28985
1732	C15H15O9N1S1	9	0.6	1	384.039	0.0666667	15	15	1	9	1	0	0.294118	0.533333	43	Highly_Unsaturated_and_Phenolic_HighOC	CHONS	0.367289	0	0.348528	0	0	0
1733	C15H16O10N0S0	8	0.666667	1.06667	355.067	0	15	16	0	10	0	0	0.3	0.266667	78	Highly_Unsaturated_and_Phenolic_HighOC	CHO	14.1438	19.2395	20.1731	15.2391	20.1239	24.94
1734	C15H16O10N0S1	8	0.666667	1.06667	387.039	0	15	16	0	10	1	0	0.222222	0.4	61	Highly_Unsaturated_and_Phenolic_HighOC	CHOS	0.719844	1.1058	0.659755	0	0.623512	0.791455
1735	C15H16O10N2S0	9	0.666667	1.06667	383.073	0.133333	15	16	2	10	0	0	0.25	0.666667	78	Highly_Unsaturated_and_Phenolic_HighOC	CHON	0.855595	1.01607	1.04609	1.17871	1.24167	1.8456
1736	C15H16O11N0S0	8	0.733333	1.06667	371.062	0	15	16	0	11	0	0	0.263158	0.4	78	Highly_Unsaturated_and_Phenolic_HighOC	CHO	9.77083	9.79591	15.9065	9.46078	12.3141	17.6716
1737	C15H16O11N0S1	8	0.733333	1.06667	403.034	0	15	16	0	11	1	0	0.176471	0.533333	51	Highly_Unsaturated_and_Phenolic_HighOC	CHOS	0.438311	0.464182	0.364014	0	0.372587	0.550229
1738	C15H16O11N2S0	9	0.733333	1.06667	399.068	0.133333	15	16	2	11	0	0	0.2	0.8	77	Highly_Unsaturated_and_Phenolic_HighOC	CHON	0.286328	0.279001	0.358668	0.393542	0.375089	0.549764
1739	C15H16O12N0S0	8	0.8	1.06667	387.057	0	15	16	0	12	0	0	0.222222	0.533333	78	Highly_Unsaturated_and_Phenolic_HighOC	CHO	3.01496	2.83369	6.18582	3.18706	3.89105	5.42914
1740	C15H16O12N0S1	8	0.8	1.06667	419.029	0	15	16	0	12	1	0	0.125	0.666667	47	Highly_Unsaturated_and_Phenolic_HighOC	CHOS	0.223187	0.187026	0.191828	0	0.186919	0.326446
1741	C15H16O12N2S0	9	0.8	1.06667	415.063	0.133333	15	16	2	12	0	0	0.142857	0.933333	36	Highly_Unsaturated_and_Phenolic_HighOC	CHON	0.112093	0	0.139594	0	0.129615	0.164175
1742	C15H16O13N0S0	8	0.866667	1.06667	403.052	0	15	16	0	13	0	0	0.176471	0.666667	78	Highly_Unsaturated_and_Phenolic_HighOC	CHO	0.702009	0.55272	1.2608	0.695188	0.792025	1.01185
1743	C15H16O13N0S1	8	0.866667	1.06667	435.024	0	15	16	0	13	1	0	0.0666667	0.8	15	Highly_Unsaturated_and_Phenolic_HighOC	CHOS	0.0928206	0	0	0	0	0.109987
1744	C15H16O14N0S0	8	0.933333	1.06667	419.047	0	15	16	0	14	0	0	0.125	0.8	49	Sugars_wo_X	CHO	0.174795	0.154426	0.249024	0.151574	0.115602	0.162778
1745	C15H16O2N0S0	8	0.133333	1.06667	227.108	0	15	16	0	2	0	0.461538	0.5	-0.8	77	Highly_Unsaturated_and_Phenolic_LowOC	CHO	1.01144	1.20263	1.08384	1.59754	1.33672	1.95046
1746	C15H16O2N2S0	9	0.133333	1.06667	255.114	0.133333	15	16	2	2	0	0.454545	0.5	-0.4	14	Highly_Unsaturated_and_Phenolic_LowOC	CHON	0.272169	0	0	0	0	0
1747	C15H16O3N0S0	8	0.2	1.06667	243.103	0	15	16	0	3	0	0.416667	0.481481	-0.666667	78	Highly_Unsaturated_and_Phenolic_LowOC	CHO	2.0976	2.51619	2.36371	3.19908	2.40439	3.50738
1748	C15H16O3N2S0	9	0.2	1.06667	271.109	0.133333	15	16	2	3	0	0.4	0.478261	-0.266667	57	Highly_Unsaturated_and_Phenolic_LowOC	CHON	0.526578	0	0.488207	0	0.545076	0.715844
1749	C15H16O4N0S0	8	0.266667	1.06667	259.098	0	15	16	0	4	0	0.363636	0.461538	-0.533333	78	Highly_Unsaturated_and_Phenolic_LowOC	CHO	2.88677	4.06544	3.17533	5.30501	3.29204	4.50835
1750	C15H16O4N2S0	9	0.266667	1.06667	287.104	0.133333	15	16	2	4	0	0.333333	0.454545	-0.133333	76	Highly_Unsaturated_and_Phenolic_LowOC	CHON	0.95604	0.792066	0.894613	1.24848	0.988756	1.23212
1751	C15H16O5N0S0	8	0.333333	1.06667	275.092	0	15	16	0	5	0	0.3	0.44	-0.4	78	Highly_Unsaturated_and_Phenolic_LowOC	CHO	3.66313	4.96388	4.18544	6.62344	4.01586	5.17559
1752	C15H16O5N0S1	8	0.333333	1.06667	307.065	0	15	16	0	5	1	0.222222	0.391304	-0.266667	51	Highly_Unsaturated_and_Phenolic_LowOC	CHOS	0.242338	0.416494	0.222354	0	0	0
1753	C15H16O5N2S0	9	0.333333	1.06667	303.099	0.133333	15	16	2	5	0	0.25	0.428571	0	78	Highly_Unsaturated_and_Phenolic_LowOC	CHON	1.55831	1.06843	1.35621	1.67007	1.31212	1.71377
1754	C15H16O6N0S0	8	0.4	1.06667	291.087	0	15	16	0	6	0	0.222222	0.416667	-0.266667	78	Highly_Unsaturated_and_Phenolic_LowOC	CHO	5.6346	7.11365	6.67296	8.63263	5.96236	7.01183
1755	C15H16O6N0S1	8	0.4	1.06667	323.059	0	15	16	0	6	1	0.125	0.363636	-0.133333	67	Highly_Unsaturated_and_Phenolic_LowOC	CHOS	0.422004	0.728312	0.348868	0	0	0.409296
1756	C15H16O6N2S0	9	0.4	1.06667	319.094	0.133333	15	16	2	6	0	0.142857	0.4	0.133333	78	Highly_Unsaturated_and_Phenolic_LowOC	CHON	2.05211	1.77282	1.87993	2.22912	1.85781	2.27411
1757	C15H16O7N0S0	8	0.466667	1.06667	307.082	0	15	16	0	7	0	0.125	0.391304	-0.133333	78	Highly_Unsaturated_and_Phenolic_LowOC	CHO	8.42168	11.6126	9.40281	10.5377	8.25249	9.53839
1758	C15H16O7N0S1	8	0.466667	1.06667	339.054	0	15	16	0	7	1	0	0.333333	0	75	Highly_Unsaturated_and_Phenolic_LowOC	CHOS	0.588676	1.32022	0.499945	0.572493	0.461445	0.5352
1759	C15H16O7N2S0	9	0.466667	1.06667	335.088	0.133333	15	16	2	7	0	0	0.368421	0.266667	78	Highly_Unsaturated_and_Phenolic_LowOC	CHON	2.68313	2.71439	2.37922	3.17454	2.57313	3.37241
1760	C15H16O8N0S0	8	0.533333	1.06667	323.077	0	15	16	0	8	0	0	0.363636	0	78	Highly_Unsaturated_and_Phenolic_HighOC	CHO	12.2972	19.749	13.9806	14.4238	13.3743	15.6916
1761	C15H16O8N0S1	8	0.533333	1.06667	355.049	0	15	16	0	8	1	0	0.3	0.133333	75	Highly_Unsaturated_and_Phenolic_HighOC	CHOS	0.816839	1.61883	0.731011	0.634925	0.621011	0.718003
1762	C15H16O8N2S0	9	0.533333	1.06667	351.083	0.133333	15	16	2	8	0	0	0.333333	0.4	78	Highly_Unsaturated_and_Phenolic_HighOC	CHON	2.81864	2.96676	2.6194	3.34632	3.24349	4.06176
1763	C15H16O9N0S0	8	0.6	1.06667	339.072	0	15	16	0	9	0	0	0.333333	0.133333	78	Highly_Unsaturated_and_Phenolic_HighOC	CHO	14.1646	24.2664	17.4476	17.0807	18.1674	22.3024
1764	C15H16O9N0S1	8	0.6	1.06667	371.044	0	15	16	0	9	1	0	0.263158	0.266667	72	Highly_Unsaturated_and_Phenolic_HighOC	CHOS	0.913396	1.7509	0.842188	0.694687	0.73719	0.977729
1765	C15H16O9N2S0	9	0.6	1.06667	367.078	0.133333	15	16	2	9	0	0	0.294118	0.533333	78	Highly_Unsaturated_and_Phenolic_HighOC	CHON	1.91512	1.96987	1.94505	2.39689	2.25637	3.35518
1766	C15H17O10N1S0	8	0.666667	1.13333	370.078	0.0666667	15	17	1	10	0	0	0.222222	0.4	78	Highly_Unsaturated_and_Phenolic_HighOC	CHON	2.17732	3.42346	2.87526	2.83667	2.70896	4.23406
1767	C15H17O10N1S1	8	0.666667	1.13333	402.05	0.0666667	15	17	1	10	1	0	0.125	0.533333	31	Highly_Unsaturated_and_Phenolic_HighOC	CHONS	0.250764	0	0.182071	0	0	0
1768	C15H17O11N1S0	8	0.733333	1.13333	386.073	0.0666667	15	17	1	11	0	0	0.176471	0.533333	78	Highly_Unsaturated_and_Phenolic_HighOC	CHON	0.789867	1.13384	1.12447	1.10309	1.20329	1.69353
1769	C15H17O11N1S1	8	0.733333	1.13333	418.045	0.0666667	15	17	1	11	1	0	0.0666667	0.666667	22	Highly_Unsaturated_and_Phenolic_HighOC	CHONS	0.112002	0	0.111305	0	0	0
1770	C15H17O12N1S0	8	0.8	1.13333	402.068	0.0666667	15	17	1	12	0	0	0.125	0.666667	73	Highly_Unsaturated_and_Phenolic_HighOC	CHON	0.202992	0.240178	0.340923	0.283367	0.330547	0.420514
1771	C15H17O13N1S0	8	0.866667	1.13333	418.063	0.0666667	15	17	1	13	0	0	0.0666667	0.8	10	Highly_Unsaturated_and_Phenolic_HighOC	CHON	0	0	0.0935386	0	0	0.0941109
1772	C15H17O2N1S0	8	0.133333	1.13333	242.119	0.0666667	15	17	1	2	0	0.416667	0.461538	-0.666667	30	Highly_Unsaturated_and_Phenolic_LowOC	CHON	0.267404	0	0.252177	0	0.301046	0.422589
1773	C15H17O3N1S0	8	0.2	1.13333	258.114	0.0666667	15	17	1	3	0	0.363636	0.44	-0.533333	70	Highly_Unsaturated_and_Phenolic_LowOC	CHON	0.505007	0.64759	0.512087	0.702032	0.54017	0.809997
1774	C15H17O4N1S0	8	0.266667	1.13333	274.108	0.0666667	15	17	1	4	0	0.3	0.416667	-0.4	78	Highly_Unsaturated_and_Phenolic_LowOC	CHON	0.756043	1.01383	0.795962	1.29564	0.801164	1.11849
1775	C15H17O5N1S0	8	0.333333	1.13333	290.103	0.0666667	15	17	1	5	0	0.222222	0.391304	-0.266667	78	Highly_Unsaturated_and_Phenolic_LowOC	CHON	1.20826	1.70784	1.2111	2.50965	1.29397	1.70784
1776	C15H17O6N1S0	8	0.4	1.13333	306.098	0.0666667	15	17	1	6	0	0.125	0.363636	-0.133333	78	Highly_Unsaturated_and_Phenolic_LowOC	CHON	1.79329	2.5629	1.76586	2.47785	1.76581	2.30887
1777	C15H17O6N1S1	8	0.4	1.13333	338.07	0.0666667	15	17	1	6	1	0	0.3	0	39	Highly_Unsaturated_and_Phenolic_LowOC	CHONS	0.168396	0	0.158127	0	0	0
1778	C15H17O7N1S0	8	0.466667	1.13333	322.093	0.0666667	15	17	1	7	0	0	0.333333	0	78	Highly_Unsaturated_and_Phenolic_LowOC	CHON	2.54617	4.15694	2.60526	3.42202	2.76575	3.54696
1779	C15H17O7N1S1	8	0.466667	1.13333	354.065	0.0666667	15	17	1	7	1	0	0.263158	0.133333	48	Highly_Unsaturated_and_Phenolic_LowOC	CHONS	0.273364	0	0.235178	0	0	0
1780	C15H17O8N1S0	8	0.533333	1.13333	338.088	0.0666667	15	17	1	8	0	0	0.3	0.133333	78	Highly_Unsaturated_and_Phenolic_HighOC	CHON	3.11153	6.39029	3.2446	21.2755	3.60229	5.10019
1781	C15H17O8N1S1	8	0.533333	1.13333	370.06	0.0666667	15	17	1	8	1	0	0.222222	0.266667	48	Highly_Unsaturated_and_Phenolic_HighOC	CHONS	0.347321	0	0.320877	0	0	0
1782	C15H17O9N1S0	8	0.6	1.13333	354.083	0.0666667	15	17	1	9	0	0	0.263158	0.266667	78	Highly_Unsaturated_and_Phenolic_HighOC	CHON	3.18153	5.87553	3.72601	4.66057	4.12591	5.89554
1783	C15H17O9N1S1	8	0.6	1.13333	386.055	0.0666667	15	17	1	9	1	0	0.176471	0.4	43	Highly_Unsaturated_and_Phenolic_HighOC	CHONS	0.294436	0	0.215899	0	0	0
1784	C15H18O10N0S0	7	0.666667	1.2	357.083	0	15	18	0	10	0	0	0.2	0.133333	78	Highly_Unsaturated_and_Phenolic_HighOC	CHO	11.1059	23.0801	16.854	13.7153	16.1257	21.2184
1785	C15H18O10N0S1	7	0.666667	1.2	389.055	0	15	18	0	10	1	0	0.111111	0.266667	61	Highly_Unsaturated_and_Phenolic_HighOC	CHOS	0.571098	1.40478	0.547129	0	0.875527	1.37068
1786	C15H18O10N2S0	8	0.666667	1.2	385.089	0.133333	15	18	2	10	0	0	0.125	0.533333	78	Highly_Unsaturated_and_Phenolic_HighOC	CHON	0.700768	1.32268	0.763306	0.861869	0.86998	1.30722
1787	C15H18O11N0S0	7	0.733333	1.2	373.078	0	15	18	0	11	0	0	0.157895	0.266667	78	Highly_Unsaturated_and_Phenolic_HighOC	CHO	5.31613	8.95134	9.80792	5.99853	7.44918	10.9374
1788	C15H18O11N0S1	7	0.733333	1.2	405.05	0	15	18	0	11	1	0	0.0588235	0.4	51	Highly_Unsaturated_and_Phenolic_HighOC	CHOS	0.372114	0.633696	0.374453	0	0.451729	0.790523
1789	C15H18O11N2S0	8	0.733333	1.2	401.084	0.133333	15	18	2	11	0	0	0.0666667	0.666667	77	Highly_Unsaturated_and_Phenolic_HighOC	CHON	0.199619	0.357227	0.260102	0.243053	0.245666	0.372803
1790	C15H18O12N0S0	7	0.8	1.2	389.073	0	15	18	0	12	0	0	0.111111	0.4	78	Highly_Unsaturated_and_Phenolic_HighOC	CHO	1.14858	1.81997	2.40233	1.32936	1.65473	2.33389
1791	C15H18O12N0S1	7	0.8	1.2	421.045	0	15	18	0	12	1	0	0	0.533333	46	Highly_Unsaturated_and_Phenolic_HighOC	CHOS	0.215457	0.278893	0.205056	0	0.20385	0.364209
1792	C15H18O12N2S0	8	0.8	1.2	417.079	0.133333	15	18	2	12	0	0	0	0.8	23	Highly_Unsaturated_and_Phenolic_HighOC	CHON	0	0	0.0748564	0	0.190094	0.103933
1793	C15H18O13N0S0	7	0.866667	1.2	405.067	0	15	18	0	13	0	0	0.0588235	0.533333	76	Highly_Unsaturated_and_Phenolic_HighOC	CHO	0.284966	0.322854	0.478365	0.257242	0.2887	0.364717
1794	C15H18O13N0S1	7	0.866667	1.2	437.04	0	15	18	0	13	1	0	0	0.666667	12	Highly_Unsaturated_and_Phenolic_HighOC	CHOS	0.0754848	0	0.058198	0	0.107168	0.115363
1795	C15H18O14N0S0	7	0.933333	1.2	421.062	0	15	18	0	14	0	0	0	0.666667	6	Sugars_wo_X	CHO	0.0670287	0	0.076092	0	0	0
1796	C15H18O2N0S0	7	0.133333	1.2	229.123	0	15	18	0	2	0	0.384615	0.428571	-0.933333	77	Highly_Unsaturated_and_Phenolic_LowOC	CHO	0.911763	1.1777	1.02524	1.92631	1.376	2.02599
1797	C15H18O2N2S0	8	0.133333	1.2	257.13	0.133333	15	18	2	2	0	0.363636	0.416667	-0.533333	12	Highly_Unsaturated_and_Phenolic_LowOC	CHON	0.186488	0	0	0	0	0
1798	C15H18O3N0S0	7	0.2	1.2	245.118	0	15	18	0	3	0	0.333333	0.407407	-0.8	78	Highly_Unsaturated_and_Phenolic_LowOC	CHO	1.58114	2.55414	1.75474	3.82357	2.17408	3.33558
1799	C15H18O3N2S0	8	0.2	1.2	273.124	0.133333	15	18	2	3	0	0.3	0.391304	-0.4	57	Highly_Unsaturated_and_Phenolic_LowOC	CHON	0.324706	0	0.298084	0	0.340841	0.491426
1800	C15H18O4N0S0	7	0.266667	1.2	261.113	0	15	18	0	4	0	0.272727	0.384615	-0.666667	78	Highly_Unsaturated_and_Phenolic_LowOC	CHO	1.95118	4.15788	2.26374	5.94945	3.01697	4.14012
1801	C15H18O4N2S0	8	0.266667	1.2	289.119	0.133333	15	18	2	4	0	0.222222	0.363636	-0.266667	76	Highly_Unsaturated_and_Phenolic_LowOC	CHON	0.625329	0.683808	0.562361	0.853355	0.637782	0.863424
1802	C15H18O5N0S0	7	0.333333	1.2	277.108	0	15	18	0	5	0	0.2	0.36	-0.533333	78	Highly_Unsaturated_and_Phenolic_LowOC	CHO	2.90677	5.13643	3.34338	7.92559	4.08762	5.38092
1803	C15H18O5N0S1	7	0.333333	1.2	309.08	0	15	18	0	5	1	0.111111	0.304348	-0.4	51	Highly_Unsaturated_and_Phenolic_LowOC	CHOS	0.145055	0.38592	0.16226	0	0	0
1804	C15H18O5N2S0	8	0.333333	1.2	305.114	0.133333	15	18	2	5	0	0.125	0.333333	-0.133333	78	Highly_Unsaturated_and_Phenolic_LowOC	CHON	1.00091	1.23226	0.917258	1.38987	0.940816	1.2629
1805	C15H18O6N0S0	7	0.4	1.2	293.103	0	15	18	0	6	0	0.111111	0.333333	-0.4	78	Highly_Unsaturated_and_Phenolic_LowOC	CHO	4.85216	9.24786	5.30062	11.7767	6.58456	8.2233
1806	C15H18O6N0S1	7	0.4	1.2	325.075	0	15	18	0	6	1	0	0.272727	-0.266667	67	Highly_Unsaturated_and_Phenolic_LowOC	CHOS	0.320031	0.849921	0.292801	0	0	0.464247
1807	C15H18O6N2S0	8	0.4	1.2	321.109	0.133333	15	18	2	6	0	0	0.3	0	78	Highly_Unsaturated_and_Phenolic_LowOC	CHON	1.48758	2.20285	1.36787	1.94476	1.39691	1.78485
1808	C15H18O7N0S0	7	0.466667	1.2	309.098	0	15	18	0	7	0	0	0.304348	-0.266667	78	Highly_Unsaturated_and_Phenolic_LowOC	CHO	8.67951	18.5558	9.47356	15.1126	10.1783	11.9741
1809	C15H18O7N0S1	7	0.466667	1.2	341.07	0	15	18	0	7	1	0	0.238095	-0.133333	75	Highly_Unsaturated_and_Phenolic_LowOC	CHOS	0.509046	1.43159	0.438658	0.716471	0.572686	0.723718
1810	C15H18O7N2S0	8	0.466667	1.2	337.104	0.133333	15	18	2	7	0	0	0.263158	0.133333	78	Highly_Unsaturated_and_Phenolic_LowOC	CHON	1.93438	3.57459	1.65922	2.73192	2.03947	2.80131
1811	C15H18O8N0S0	7	0.533333	1.2	325.093	0	15	18	0	8	0	0	0.272727	-0.133333	78	Highly_Unsaturated_and_Phenolic_HighOC	CHO	13.2909	33.7568	14.9704	21.9169	17.4444	21.0482
1812	C15H18O8N0S1	7	0.533333	1.2	357.065	0	15	18	0	8	1	0	0.2	0	75	Highly_Unsaturated_and_Phenolic_HighOC	CHOS	0.722854	2.12665	0.710859	1.03564	0.936295	1.27776
1813	C15H18O8N2S0	8	0.533333	1.2	353.099	0.133333	15	18	2	8	0	0	0.222222	0.266667	78	Highly_Unsaturated_and_Phenolic_HighOC	CHON	2.10268	4.14989	2.03312	2.82599	2.44659	3.38181
1814	C15H18O9N0S0	7	0.6	1.2	341.088	0	15	18	0	9	0	0	0.238095	0	78	Highly_Unsaturated_and_Phenolic_HighOC	CHO	13.5688	35.3558	16.8313	19.8905	18.5307	24.0094
1815	C15H18O9N0S1	7	0.6	1.2	373.06	0	15	18	0	9	1	0	0.157895	0.133333	72	Highly_Unsaturated_and_Phenolic_HighOC	CHOS	0.863159	2.28925	0.784161	1.15216	1.20184	1.76736
1816	C15H18O9N2S0	8	0.6	1.2	369.094	0.133333	15	18	2	9	0	0	0.176471	0.4	78	Highly_Unsaturated_and_Phenolic_HighOC	CHON	1.59494	3.04021	1.63044	1.95753	1.74503	2.71757
1817	C15H19O10N1S0	7	0.666667	1.26667	372.094	0.0666667	15	19	1	10	0	0	0.111111	0.266667	78	Highly_Unsaturated_and_Phenolic_HighOC	CHON	1.12109	3.44126	1.47768	1.50764	1.41759	2.09923
1818	C15H19O10N1S1	7	0.666667	1.26667	404.066	0.0666667	15	19	1	10	1	0	0	0.4	26	Highly_Unsaturated_and_Phenolic_HighOC	CHONS	0.1885	0	0.178066	0	0	0
1819	C15H19O11N1S0	7	0.733333	1.26667	388.089	0.0666667	15	19	1	11	0	0	0.0588235	0.4	77	Highly_Unsaturated_and_Phenolic_HighOC	CHON	0.334478	0.981697	0.463156	0.48477	0.530838	0.684685
1820	C15H19O11N1S1	7	0.733333	1.26667	420.061	0.0666667	15	19	1	11	1	0	0	0.533333	19	Highly_Unsaturated_and_Phenolic_HighOC	CHONS	0.12191	0	0.111539	0	0	0
1821	C15H19O12N1S0	7	0.8	1.26667	404.083	0.0666667	15	19	1	12	0	0	0	0.533333	51	Highly_Unsaturated_and_Phenolic_HighOC	CHON	0.120186	0.236813	0.159235	0.122862	0.102422	0.186401
1822	C15H19O2N1S0	7	0.133333	1.26667	244.134	0.0666667	15	19	1	2	0	0.333333	0.384615	-0.8	20	Highly_Unsaturated_and_Phenolic_LowOC	CHON	0.135994	0	0.145985	0	0.165755	0.266542
1823	C15H19O3N1S0	7	0.2	1.26667	260.129	0.0666667	15	19	1	3	0	0.272727	0.36	-0.666667	67	Highly_Unsaturated_and_Phenolic_LowOC	CHON	0.249856	0.53054	0.257034	0.507723	0.34113	0.490537
1824	C15H19O4N1S0	7	0.266667	1.26667	276.124	0.0666667	15	19	1	4	0	0.2	0.333333	-0.533333	78	Highly_Unsaturated_and_Phenolic_LowOC	CHON	0.389132	0.779293	0.40728	0.834826	0.475908	0.702763
1825	C15H19O5N1S0	7	0.333333	1.26667	292.119	0.0666667	15	19	1	5	0	0.111111	0.304348	-0.4	78	Highly_Unsaturated_and_Phenolic_LowOC	CHON	0.612425	1.29116	0.629996	1.50255	0.848399	1.07404
1826	C15H19O6N1S0	7	0.4	1.26667	308.114	0.0666667	15	19	1	6	0	0	0.272727	-0.266667	78	Highly_Unsaturated_and_Phenolic_LowOC	CHON	0.974026	2.33209	1.00296	1.98883	1.18055	1.52626
1827	C15H19O6N1S1	7	0.4	1.26667	340.086	0.0666667	15	19	1	6	1	0	0.2	-0.133333	25	Highly_Unsaturated_and_Phenolic_LowOC	CHONS	0.123529	0	0.0936025	0	0	0
1828	C15H19O7N1S0	7	0.466667	1.26667	324.109	0.0666667	15	19	1	7	0	0	0.238095	-0.133333	78	Highly_Unsaturated_and_Phenolic_LowOC	CHON	1.50575	4.60882	1.65805	2.74837	1.93288	2.51551
1829	C15H19O7N1S1	7	0.466667	1.26667	356.081	0.0666667	15	19	1	7	1	0	0.157895	0	40	Highly_Unsaturated_and_Phenolic_LowOC	CHONS	0.1677	0	0.153143	0	0	0
1830	C15H19O8N1S0	7	0.533333	1.26667	340.104	0.0666667	15	19	1	8	0	0	0.2	0	78	Highly_Unsaturated_and_Phenolic_HighOC	CHON	1.89008	6.0318	2.00679	3.1066	2.33782	3.32432
1831	C15H19O8N1S1	7	0.533333	1.26667	372.076	0.0666667	15	19	1	8	1	0	0.111111	0.133333	42	Highly_Unsaturated_and_Phenolic_HighOC	CHONS	0.229283	0	0.236051	0	0	0
1832	C15H19O9N1S0	7	0.6	1.26667	356.099	0.0666667	15	19	1	9	0	0	0.157895	0.133333	78	Highly_Unsaturated_and_Phenolic_HighOC	CHON	1.80943	5.5772	2.13697	2.58953	2.30719	3.24829
1833	C15H19O9N1S1	7	0.6	1.26667	388.071	0.0666667	15	19	1	9	1	0	0.0588235	0.266667	36	Highly_Unsaturated_and_Phenolic_HighOC	CHONS	0.204671	0	0.195406	0	0	0
1834	C15H20O10N0S0	6	0.666667	1.33333	359.098	0	15	20	0	10	0	0	0.1	0	78	Highly_Unsaturated_and_Phenolic_HighOC	CHO	4.16849	12.7969	6.69401	4.8992	4.89764	6.81032
1835	C15H20O10N0S1	6	0.666667	1.33333	391.07	0	15	20	0	10	1	0	0	0.133333	61	Highly_Unsaturated_and_Phenolic_HighOC	CHOS	0.625949	1.74543	0.603474	0	0.976475	1.61889
1836	C15H20O10N2S0	7	0.666667	1.33333	387.105	0.133333	15	20	2	10	0	0	0	0.4	77	Highly_Unsaturated_and_Phenolic_HighOC	CHON	0.297144	1.12856	0.335917	0.326352	0.342476	0.420091
1837	C15H20O11N0S0	6	0.733333	1.33333	375.093	0	15	20	0	11	0	0	0.0526316	0.133333	78	Highly_Unsaturated_and_Phenolic_HighOC	CHO	1.37721	3.57079	2.31007	1.57784	1.80874	2.57893
1838	C15H20O11N0S1	6	0.733333	1.33333	407.065	0	15	20	0	11	1	0	0	0.266667	51	Highly_Unsaturated_and_Phenolic_HighOC	CHOS	0.378241	0.744522	0.347377	0	0.474336	0.812749
1839	C15H20O11N2S0	7	0.733333	1.33333	403.099	0.133333	15	20	2	11	0	0	0	0.533333	67	Highly_Unsaturated_and_Phenolic_HighOC	CHON	0.12902	0.293908	0.129667	0.120274	0.0943413	0.125016
1840	C15H20O12N0S0	6	0.8	1.33333	391.088	0	15	20	0	12	0	0	0	0.266667	77	Highly_Unsaturated_and_Phenolic_HighOC	CHO	0.319865	0.714816	0.522973	0.346467	0.362069	0.497818
1841	C15H20O12N0S1	6	0.8	1.33333	423.06	0	15	20	0	12	1	0	0	0.4	46	Highly_Unsaturated_and_Phenolic_HighOC	CHOS	0.149684	0.307006	0.169886	0	0.130513	0.2433
1842	C15H20O13N0S0	6	0.866667	1.33333	407.083	0	15	20	0	13	0	0	0	0.4	51	Highly_Unsaturated_and_Phenolic_HighOC	CHO	0.0878135	0.21011	0.152227	0	0	0.136065
1843	C15H20O2N0S0	6	0.133333	1.33333	231.139	0	15	20	0	2	0	0.307692	0.357143	-1.06667	77	Highly_Unsaturated_and_Phenolic_LowOC	CHO	0.686806	0.928509	0.770761	1.67224	1.00764	1.50505
1844	C15H20O2N2S0	7	0.133333	1.33333	259.145	0.133333	15	20	2	2	0	0.272727	0.333333	-0.666667	5	Highly_Unsaturated_and_Phenolic_LowOC	CHON	0.0763319	0	0	0	0	0
1845	C15H20O3N0S0	6	0.2	1.33333	247.134	0	15	20	0	3	0	0.25	0.333333	-0.933333	78	Highly_Unsaturated_and_Phenolic_LowOC	CHO	1.08163	2.04433	1.1264	3.00961	1.45379	2.22382
1846	C15H20O3N2S0	7	0.2	1.33333	275.14	0.133333	15	20	2	3	0	0.2	0.304348	-0.533333	53	Highly_Unsaturated_and_Phenolic_LowOC	CHON	0.118582	0	0.122169	0	0.158508	0.204648
1847	C15H20O4N0S0	6	0.266667	1.33333	263.129	0	15	20	0	4	0	0.181818	0.307692	-0.8	78	Highly_Unsaturated_and_Phenolic_LowOC	CHO	1.29634	3.07064	1.45337	4.37528	1.87185	2.74839
1848	C15H20O4N2S0	7	0.266667	1.33333	291.135	0.133333	15	20	2	4	0	0.111111	0.272727	-0.4	76	Highly_Unsaturated_and_Phenolic_LowOC	CHON	0.24137	0.493888	0.213492	0.430601	0.275136	0.364886
1849	C15H20O5N0S0	6	0.333333	1.33333	279.124	0	15	20	0	5	0	0.1	0.28	-0.666667	78	Highly_Unsaturated_and_Phenolic_LowOC	CHO	2.10808	5.12996	2.31284	7.06998	2.91079	3.85982
1850	C15H20O5N0S1	6	0.333333	1.33333	311.096	0	15	20	0	5	1	0	0.217391	-0.533333	50	Highly_Unsaturated_and_Phenolic_LowOC	CHOS	0.131123	0.390081	0.123149	0	0	0
1851	C15H20O5N2S0	7	0.333333	1.33333	307.13	0.133333	15	20	2	5	0	0	0.238095	-0.266667	78	Highly_Unsaturated_and_Phenolic_LowOC	CHON	0.394155	0.843661	0.35969	0.672485	0.412479	0.534438
1852	C15H20O6N0S0	6	0.4	1.33333	295.119	0	15	20	0	6	0	0	0.25	-0.533333	78	Highly_Unsaturated_and_Phenolic_LowOC	CHO	3.7764	10.7064	3.9973	10.7935	4.67881	5.80838
1853	C15H20O6N0S1	6	0.4	1.33333	327.091	0	15	20	0	6	1	0	0.181818	-0.4	67	Highly_Unsaturated_and_Phenolic_LowOC	CHOS	0.319683	1.0177	0.281276	0	0	0.600312
1854	C15H20O6N2S0	7	0.4	1.33333	323.125	0.133333	15	20	2	6	0	0	0.2	-0.133333	78	Highly_Unsaturated_and_Phenolic_LowOC	CHON	0.71402	1.86013	0.659606	1.09257	0.649615	0.894752
1855	C15H20O7N0S0	6	0.466667	1.33333	311.114	0	15	20	0	7	0	0	0.217391	-0.4	78	Highly_Unsaturated_and_Phenolic_LowOC	CHO	7.50995	22.3062	7.52774	14.9051	7.16007	8.60677
1856	C15H20O7N2S0	7	0.466667	1.33333	339.12	0.133333	15	20	2	7	0	0	0.157895	0	78	Highly_Unsaturated_and_Phenolic_LowOC	CHON	0.877923	3.07495	0.778558	1.45306	0.956465	1.23064
1857	C15H20O8N0S0	6	0.533333	1.33333	327.109	0	15	20	0	8	0	0	0.181818	-0.266667	78	Highly_Unsaturated_and_Phenolic_HighOC	CHO	9.19241	35.9371	10.1628	17.3778	10.2643	12.5437
1858	C15H20O8N0S1	6	0.533333	1.33333	359.081	0	15	20	0	8	1	0	0.1	-0.133333	75	Highly_Unsaturated_and_Phenolic_HighOC	CHOS	0.911369	2.79841	0.826723	1.73701	1.41005	2.0759
1859	C15H20O8N2S0	7	0.533333	1.33333	355.115	0.133333	15	20	2	8	0	0	0.111111	0.133333	78	Highly_Unsaturated_and_Phenolic_HighOC	CHON	1.09444	3.65915	0.974497	1.34806	1.0705	1.42864
1860	C15H20O9N0S0	6	0.6	1.33333	343.103	0	15	20	0	9	0	0	0.142857	-0.133333	78	Highly_Unsaturated_and_Phenolic_HighOC	CHO	7.83221	27.4673	9.89181	10.6954	8.46831	11.2816
1861	C15H20O9N0S1	6	0.6	1.33333	375.076	0	15	20	0	9	1	0	0.0526316	0	72	Highly_Unsaturated_and_Phenolic_HighOC	CHOS	0.938038	3.1996	0.857078	1.79844	1.63221	2.57334
1862	C15H20O9N2S0	7	0.6	1.33333	371.11	0.133333	15	20	2	9	0	0	0.0588235	0.266667	78	Highly_Unsaturated_and_Phenolic_HighOC	CHON	0.764136	2.73346	0.781008	0.87706	0.773843	1.13776
1863	C15H21O10N1S0	6	0.666667	1.4	374.109	0.0666667	15	21	1	10	0	0	0	0.133333	77	Highly_Unsaturated_and_Phenolic_HighOC	CHON	0.364641	1.67632	0.44147	0.448462	0.40831	0.580033
1864	C15H21O10N1S1	6	0.666667	1.4	406.081	0.0666667	15	21	1	10	1	0	0	0.266667	23	Highly_Unsaturated_and_Phenolic_HighOC	CHONS	0.126312	0	0.111923	0	0	0
1865	C15H21O11N1S0	6	0.733333	1.4	390.104	0.0666667	15	21	1	11	0	0	0	0.266667	62	Highly_Unsaturated_and_Phenolic_HighOC	CHON	0.115511	0.653958	0.167522	0.147985	0.13404	0.19652
1866	C15H21O12N1S0	6	0.8	1.4	406.099	0.0666667	15	21	1	12	0	0	0	0.4	45	Highly_Unsaturated_and_Phenolic_HighOC	CHON	0	0.397209	0.0777536	0	0	0
1867	C15H21O2N1S0	6	0.133333	1.4	246.15	0.0666667	15	21	1	2	0	0.25	0.307692	-0.933333	9	Highly_Unsaturated_and_Phenolic_LowOC	CHON	0	0	0.0742174	0	0.10813	0.124254
1868	C15H21O3N1S0	6	0.2	1.4	262.145	0.0666667	15	21	1	3	0	0.181818	0.28	-0.8	45	Highly_Unsaturated_and_Phenolic_LowOC	CHON	0.109415	0.214923	0.0938794	0.160088	0.110503	0.16934
1869	C15H21O4N1S0	6	0.266667	1.4	278.14	0.0666667	15	21	1	4	0	0.1	0.25	-0.666667	72	Highly_Unsaturated_and_Phenolic_LowOC	CHON	0.160938	0.383279	0.13723	0.378434	0.18724	0.310401
1870	C15H21O5N1S0	6	0.333333	1.4	294.135	0.0666667	15	21	1	5	0	0	0.217391	-0.533333	78	Highly_Unsaturated_and_Phenolic_LowOC	CHON	0.240568	0.77061	0.243188	0.80386	0.334331	0.477371
1871	C15H21O6N1S0	6	0.4	1.4	310.13	0.0666667	15	21	1	6	0	0	0.181818	-0.4	78	Highly_Unsaturated_and_Phenolic_LowOC	CHON	0.427283	1.45992	0.396607	1.05918	0.510412	0.679267
1872	C15H21O7N1S0	6	0.466667	1.4	326.125	0.0666667	15	21	1	7	0	0	0.142857	-0.266667	78	Highly_Unsaturated_and_Phenolic_LowOC	CHON	0.588585	2.79587	0.598937	1.36458	0.769642	1.03357
1873	C15H21O7N1S1	6	0.466667	1.4	358.097	0.0666667	15	21	1	7	1	0	0.0526316	-0.133333	28	Highly_Unsaturated_and_Phenolic_LowOC	CHONS	0.11949	0	0.113989	0	0	0
1874	C15H21O8N1S0	6	0.533333	1.4	342.119	0.0666667	15	21	1	8	0	0	0.1	-0.133333	78	Highly_Unsaturated_and_Phenolic_HighOC	CHON	0.713536	4.04966	0.739809	1.15049	0.751171	1.07971
1875	C15H21O8N1S1	6	0.533333	1.4	374.092	0.0666667	15	21	1	8	1	0	0	0	31	Highly_Unsaturated_and_Phenolic_HighOC	CHONS	0.1813	0	0.147412	0	0	0
1876	C15H21O9N1S0	6	0.6	1.4	358.114	0.0666667	15	21	1	9	0	0	0.0526316	0	78	Highly_Unsaturated_and_Phenolic_HighOC	CHON	0.621955	3.20122	0.686255	0.842839	0.684504	0.924683
1877	C15H21O9N1S1	6	0.6	1.4	390.086	0.0666667	15	21	1	9	1	0	0	0.133333	28	Highly_Unsaturated_and_Phenolic_HighOC	CHONS	0.16233	0	0.140127	0	0	0
1878	C15H22O10N0S0	5	0.666667	1.46667	361.114	0	15	22	0	10	0	0	0	-0.133333	78	Highly_Unsaturated_and_Phenolic_HighOC	CHO	0.86272	3.40811	1.19447	1.02471	0.798791	1.06833
1879	C15H22O10N0S1	5	0.666667	1.46667	393.086	0	15	22	0	10	1	0	0	0	57	Highly_Unsaturated_and_Phenolic_HighOC	CHOS	0.456933	1.72123	0.404212	0	0.568838	0.823545
1880	C15H22O10N2S0	6	0.666667	1.46667	389.12	0.133333	15	22	2	10	0	0	0	0.266667	67	Highly_Unsaturated_and_Phenolic_HighOC	CHON	0.138732	0.811242	0.165264	0	0	0
1881	C15H22O11N0S0	5	0.733333	1.46667	377.109	0	15	22	0	11	0	0	0	0	78	Highly_Unsaturated_and_Phenolic_HighOC	CHO	0.284029	1.19818	0.36165	0.302564	0.29646	0.336479
1882	C15H22O11N0S1	5	0.733333	1.46667	409.081	0	15	22	0	11	1	0	0	0.133333	48	Highly_Unsaturated_and_Phenolic_HighOC	CHOS	0.239358	0.705518	0.207037	0	0.224534	0.387154
1883	C15H22O11N2S0	6	0.733333	1.46667	405.115	0.133333	15	22	2	11	0	0	0	0.4	55	Highly_Unsaturated_and_Phenolic_HighOC	CHON	0	0.384075	0.0713629	0	0	0
1884	C15H22O12N0S0	5	0.8	1.46667	393.104	0	15	22	0	12	0	0	0	0.133333	68	Highly_Unsaturated_and_Phenolic_HighOC	CHO	0.0766042	0.480681	0.08342	0	0	0.0964817
1885	C15H22O12N0S1	5	0.8	1.46667	425.076	0	15	22	0	12	1	0	0	0.266667	34	Highly_Unsaturated_and_Phenolic_HighOC	CHOS	0	0.206528	0.0619472	0	0	0
1886	C15H22O13N0S0	5	0.866667	1.46667	409.099	0	15	22	0	13	0	0	0	0.266667	35	Highly_Unsaturated_and_Phenolic_HighOC	CHO	0	0.184638	0	0	0	0
1887	C15H22O2N0S0	5	0.133333	1.46667	233.155	0	15	22	0	2	0	0.230769	0.285714	-1.2	77	Highly_Unsaturated_and_Phenolic_LowOC	CHO	0.319774	0.528116	0.403275	1.02872	0.424344	0.686294
1888	C15H22O3N0S0	5	0.2	1.46667	249.15	0	15	22	0	3	0	0.166667	0.259259	-1.06667	78	Highly_Unsaturated_and_Phenolic_LowOC	CHO	0.466932	1.06767	0.511917	1.54687	0.566561	0.903939
1889	C15H22O4N0S0	5	0.266667	1.46667	265.145	0	15	22	0	4	0	0.0909091	0.230769	-0.933333	78	Highly_Unsaturated_and_Phenolic_LowOC	CHO	0.675143	1.77988	0.706897	2.09391	0.787856	1.12628
1890	C15H22O4N2S0	6	0.266667	1.46667	293.151	0.133333	15	22	2	4	0	0	0.181818	-0.533333	54	Highly_Unsaturated_and_Phenolic_LowOC	CHON	0	0.230553	0.0732801	0.146566	0.103801	0
1891	C15H22O5N0S0	5	0.333333	1.46667	281.139	0	15	22	0	5	0	0	0.2	-0.8	78	Highly_Unsaturated_and_Phenolic_LowOC	CHO	1.14148	3.42157	1.16479	3.50982	1.19145	1.6048
1892	C15H22O5N2S0	6	0.333333	1.46667	309.146	0.133333	15	22	2	5	0	0	0.142857	-0.4	78	Highly_Unsaturated_and_Phenolic_LowOC	CHON	0.134178	0.565167	0.102251	0.207663	0.146354	0.155412
1893	C15H22O6N0S0	5	0.4	1.46667	297.134	0	15	22	0	6	0	0	0.166667	-0.666667	78	Highly_Unsaturated_and_Phenolic_LowOC	CHO	1.76849	6.96378	1.79672	4.68419	1.69712	2.0356
1894	C15H22O6N2S0	6	0.4	1.46667	325.141	0.133333	15	22	2	6	0	0	0.1	-0.266667	78	Highly_Unsaturated_and_Phenolic_LowOC	CHON	0.211161	1.3936	0.190123	0.390203	0.167743	0.257397
1895	C15H22O7N0S0	5	0.466667	1.46667	313.129	0	15	22	0	7	0	0	0.130435	-0.533333	78	Highly_Unsaturated_and_Phenolic_LowOC	CHO	2.96431	15.3673	2.87328	5.60482	2.34648	2.81651
1896	C15H22O7N0S1	5	0.466667	1.46667	345.101	0	15	22	0	7	1	0	0.047619	-0.4	75	Highly_Unsaturated_and_Phenolic_LowOC	CHOS	0.798399	2.39277	0.715205	1.61832	1.04975	1.34295
1897	C15H22O7N2S0	6	0.466667	1.46667	341.135	0.133333	15	22	2	7	0	0	0.0526316	-0.133333	78	Highly_Unsaturated_and_Phenolic_LowOC	CHON	0.315871	2.00605	0.269347	0.39062	0.259262	0.313915
1898	C15H22O8N0S0	5	0.533333	1.46667	329.124	0	15	22	0	8	0	0	0.0909091	-0.4	78	Highly_Unsaturated_and_Phenolic_HighOC	CHO	3.12941	18.977	3.25329	4.78869	2.55789	3.09783
1899	C15H22O8N0S1	5	0.533333	1.46667	361.096	0	15	22	0	8	1	0	0	-0.266667	75	Highly_Unsaturated_and_Phenolic_HighOC	CHOS	0.968127	3.67112	0.860189	1.79794	1.3364	1.96126
1900	C15H22O8N2S0	6	0.533333	1.46667	357.13	0.133333	15	22	2	8	0	0	0	0	78	Highly_Unsaturated_and_Phenolic_HighOC	CHON	0.346338	2.369	0.349678	0.392457	0.289309	0.351678
1901	C15H22O9N0S0	5	0.6	1.46667	345.119	0	15	22	0	9	0	0	0.047619	-0.266667	78	Highly_Unsaturated_and_Phenolic_HighOC	CHO	2.04012	11.1975	2.53134	2.78643	1.66755	2.2623
1902	C15H22O9N0S1	5	0.6	1.46667	377.091	0	15	22	0	9	1	0	0	-0.133333	71	Highly_Unsaturated_and_Phenolic_HighOC	CHOS	0.799761	3.62691	0.736571	1.47609	1.20646	1.86088
1903	C15H22O9N2S0	6	0.6	1.46667	373.125	0.133333	15	22	2	9	0	0	0	0.133333	77	Highly_Unsaturated_and_Phenolic_HighOC	CHON	0.260612	1.80575	0.27708	0.28512	0.188747	0.229414
1904	C15H23O10N1S0	5	0.666667	1.53333	376.125	0.0666667	15	23	1	10	0	0	0	0	66	Peptide_like	CHON	0.126766	1.14882	0.109558	0.139138	0	0.120105
1905	C15H23O11N1S0	5	0.733333	1.53333	392.12	0.0666667	15	23	1	11	0	0	0	0.133333	50	Peptide_like	CHON	0.0758781	0.852056	0.0675497	0	0	0
1906	C15H23O12N1S0	5	0.8	1.53333	408.115	0.0666667	15	23	1	12	0	0	0	0.266667	35	Peptide_like	CHON	0	0.483648	0	0	0	0
1907	C15H23O13N1S0	5	0.866667	1.53333	424.11	0.0666667	15	23	1	13	0	0	0	0.4	24	Peptide_like	CHON	0	0.255085	0	0	0	0
1908	C15H23O4N1S0	5	0.266667	1.53333	280.155	0.0666667	15	23	1	4	0	0	0.166667	-0.8	35	Peptide_like	CHON	0	0	0.0701912	0.149654	0	0
1909	C15H23O5N1S0	5	0.333333	1.53333	296.15	0.0666667	15	23	1	5	0	0	0.130435	-0.666667	52	Peptide_like	CHON	0.068012	0.275383	0	0.717723	0.110118	0.0977941
1910	C15H23O6N1S0	5	0.4	1.53333	312.145	0.0666667	15	23	1	6	0	0	0.0909091	-0.533333	67	Peptide_like	CHON	0.129625	0.600227	0.11122	0.556801	0.134746	0.191101
1911	C15H23O7N1S0	5	0.466667	1.53333	328.14	0.0666667	15	23	1	7	0	0	0.047619	-0.4	74	Peptide_like	CHON	0.16705	1.17039	0.177875	0.419166	0.188138	0.22645
1912	C15H23O7N1S1	5	0.466667	1.53333	360.112	0.0666667	15	23	1	7	1	0	0	-0.266667	23	Peptide_like	CHONS	0.0750007	0	0	0	0	0
1913	C15H23O8N1S0	5	0.533333	1.53333	344.135	0.0666667	15	23	1	8	0	0	0	-0.266667	74	Peptide_like	CHON	0.170499	1.24702	0.170483	0.280612	0.155301	0.234367
1914	C15H23O8N1S1	5	0.533333	1.53333	376.107	0.0666667	15	23	1	8	1	0	0	-0.133333	29	Peptide_like	CHONS	0.0659244	0	0.0712989	0	0	0
1915	C15H23O9N1S0	5	0.6	1.53333	360.13	0.0666667	15	23	1	9	0	0	0	-0.133333	75	Peptide_like	CHON	0.162254	1.31222	0.176533	0.290461	0.108451	0.147665
1916	C15H24O10N0S0	4	0.666667	1.6	363.13	0	15	24	0	10	0	0	0	-0.266667	65	Aliphatic_HighOC	CHO	0.135555	0.82633	0.145751	0.248144	0	0.117353
1917	C15H24O10N0S1	4	0.666667	1.6	395.102	0	15	24	0	10	1	0	0	-0.133333	49	Aliphatic_HighOC	CHOS	0.222794	1.29797	0.169354	0	0.152896	0.260657
1918	C15H24O10N2S0	5	0.666667	1.6	391.136	0.133333	15	24	2	10	0	0	0	0.133333	42	Peptide_like	CHON	0	0.54722	0	0	0	0
1919	C15H24O11N0S0	4	0.733333	1.6	379.125	0	15	24	0	11	0	0	0	-0.133333	52	Aliphatic_HighOC	CHO	0	0.443739	0.0575376	0	0	0
1920	C15H24O11N0S1	4	0.733333	1.6	411.097	0	15	24	0	11	1	0	0	0	40	Aliphatic_HighOC	CHOS	0.133452	0.479632	0	0	0	0
1921	C15H24O11N2S0	5	0.733333	1.6	407.131	0.133333	15	24	2	11	0	0	0	0.266667	38	Peptide_like	CHON	0	0.287251	0	0	0	0
1922	C15H24O12N0S0	4	0.8	1.6	395.12	0	15	24	0	12	0	0	0	0	47	Aliphatic_HighOC	CHO	0.0835173	0.637531	0	0	0	0
1923	C15H24O12N2S0	5	0.8	1.6	423.126	0.133333	15	24	2	12	0	0	0	0.4	12	Peptide_like	CHON	0	0.144042	0	0	0	0
1924	C15H24O13N0S0	4	0.866667	1.6	411.114	0	15	24	0	13	0	0	0	0.133333	41	Aliphatic_HighOC	CHO	0	0.390804	0	0	0	0
1925	C15H24O2N0S0	4	0.133333	1.6	235.17	0	15	24	0	2	0	0.153846	0.214286	-1.33333	57	Aliphatic_LowOC	CHO	0.092866	0.209821	0.13331	0.323931	0.133175	0.174505
[truncated: 15,843 more rows]

## Sheet: FT-ICR MS data TABLE 1
Table 1: The number of molecular formulas assigned, modified aromaticity index (AI-mod), mean molecular weight (mean MW) and relative abundance of defined compound class revealed by FT-ICR MS for DOM samples from the QTP, including soil leachates (AL and PL) and stream waters (Q-1, Q-9 and Q-17).
Sample	Formulas assigned	Mean MW	AImod	CA	Pol.	Uns.	Ali.	Pep.
				(%)	(%)	(%)	(%)	(%)
AL	14709	498.81	0.47	17.23	27.1	54.28	1.16	0.14
PL	9645	452.73	0.3	4.32	11.33	74.23	7.92	2.12
Q-1	14924	510.07	0.43	12.05	23.69	62.85	1.14	0.14
Q-9	11724	500.19	0.38	6.86	15.82	76.32	0.86	0.06
Q-17	11074	486.5	0.36	5.53	12.91	80.31	1.11	0.08

## Sheet: FT-ICR MS data TABLE 2
Table 2: The number of specific molecules identified in the AL leachate DOM and the PL leachate DOM within the fluvial network, and the percentage of peaks disappeared during the transportation.
Samples		All peaks	Only CHO	Contains N	Contains S	Contains N& S	Condensed aromatics	Polyhoenols	Unsatuated	Aliphatics	Peptides
AL specific	AL	6409	1793	3370	424	822	1620	1720	2970	38	23
	Q-1	5311 (17%)	1653 (8%)	2791 (17%)	349 (18%)	517 (37%)	1278 (21%)	1416 (18%)	2549 (14%)	20 (47%)	14 (39%)
	Q-9	3365 (47%)	1294 (28%)	1917 (43%)	153 (64%)	0 (100%)	748 (54%)	838 (51%)	1759 (41%)	6 (84%)	1 (96%)
	Q-17	2623 (59%)	985 (45%)	1570 (53%)	67 (84%)	0 (100%)	550 (66%)	602 (65%)	1453 (51%)	5 (87%)	0 (100%)
PL specific	PL	1345	515	551	278	0	2	23	318	597	385
	Q-1	222 (83%)	90 (83%)	102 (81%)	30 (89%)	0	0 (100%)	11 (52%)	126 (60%)	46 (92%)	36 (91%)
	Q-9	117 (91%)	44 (91%)	46 (92%)	27 (90%)	0	2 (0%)	14 (39%)	96 (70%)	1 (100%)	4 (99%)
	Q-17	130 (90%)	47 (91%)	55 (90%)	28 (90%)	0	2 (0%)	13 (43%)	104 (67%)	6 (99%)	5 (99%)
